# Supplementary material for: Change of soil microbial community under long-term fertilization in a reclaimed sandy agricultural ecosystem
Source: PeerJ. 2019 Feb 27;7:e6497. doi: 10.7717/peerj.6497 (PMC6397634; doi:10.7717/peerj.6497)
Supplement: Table S2 — The OTU numbers of bacteria in different samples by using a threshold of 0.97. [file peerj-07-6497-s004.xls]

## Sheet: OTU表
Domain	Kingdom	Phylum	Class	Order	Family	Genus	Species	OTU	CF_2	CF_3	CF_1	OF_2	OF_3	OF_1	C_3	C_2	C_1	CK1	CK3	CK2	SUM
d__Archaea	k__norank_d__Archaea	p__Thaumarchaeota	c__Soil_Crenarchaeotic_Group_SCG_	o__Unknown_Order_c__Soil_Crenarchaeotic_Group_SCG_	f__Unknown_Family_o__Unknown_Order_c__Soil_Crenarchaeotic_Group_SCG_	g__Candidatus_Nitrososphaera	s__unclassified_g__Candidatus_Nitrososphaera	OTU3256	118	59	26	82	109	22	126	191	108	59	26	12	938
d__Archaea	k__norank_d__Archaea	p__Thaumarchaeota	c__Soil_Crenarchaeotic_Group_SCG_	o__norank_c__Soil_Crenarchaeotic_Group_SCG_	f__norank_c__Soil_Crenarchaeotic_Group_SCG_	g__norank_c__Soil_Crenarchaeotic_Group_SCG_	s__uncultured_crenarchaeote_g__norank_c__Soil_Crenarchaeotic_Group_SCG_	OTU2767	1578	763	807	1470	1661	496	642	836	612	224	85	73	9247
d__Archaea	k__norank_d__Archaea	p__Euryarchaeota	c__Thermoplasmata	o__Thermoplasmatales	f__unclassified_o__Thermoplasmatales	g__unclassified_o__Thermoplasmatales	s__unclassified_o__Thermoplasmatales	OTU1156	1	0	0	5	0	0	1	4	1	0	0	0	12
d__Archaea	k__norank_d__Archaea	p__Euryarchaeota	c__Thermoplasmata	o__Thermoplasmatales	f__unclassified_o__Thermoplasmatales	g__unclassified_o__Thermoplasmatales	s__unclassified_o__Thermoplasmatales	OTU77	4	15	2	62	7	1	3	4	2	0	0	0	100
d__Archaea	k__norank_d__Archaea	p__Thaumarchaeota	c__Soil_Crenarchaeotic_Group_SCG_	o__Unknown_Order_c__Soil_Crenarchaeotic_Group_SCG_	f__Unknown_Family_o__Unknown_Order_c__Soil_Crenarchaeotic_Group_SCG_	g__Candidatus_Nitrososphaera	s__unclassified_g__Candidatus_Nitrososphaera	OTU745	9	1	0	2	2	2	5	8	18	35	7	8	97
d__Archaea	k__norank_d__Archaea	p__Thaumarchaeota	c__Soil_Crenarchaeotic_Group_SCG_	o__unclassified_c__Soil_Crenarchaeotic_Group_SCG_	f__unclassified_c__Soil_Crenarchaeotic_Group_SCG_	g__unclassified_c__Soil_Crenarchaeotic_Group_SCG_	s__unclassified_c__Soil_Crenarchaeotic_Group_SCG_	OTU2280	375	213	114	345	321	101	243	338	203	25	11	11	2300
d__Archaea	k__norank_d__Archaea	p__Thaumarchaeota	c__Soil_Crenarchaeotic_Group_SCG_	o__norank_c__Soil_Crenarchaeotic_Group_SCG_	f__norank_c__Soil_Crenarchaeotic_Group_SCG_	g__norank_c__Soil_Crenarchaeotic_Group_SCG_	s__uncultured_euryarchaeote_g__norank_c__Soil_Crenarchaeotic_Group_SCG_	OTU2569	23	19	12	32	30	8	3	12	6	46	19	42	252
d__Archaea	k__norank_d__Archaea	p__Euryarchaeota	c__Thermoplasmata	o__Thermoplasmatales	f__Marine_Group_II	g__norank_f__Marine_Group_II	s__uncultured_archaeon_g__norank_f__Marine_Group_II	OTU3234	1	2	0	18	6	0	5	3	3	0	0	0	38
d__Archaea	k__norank_d__Archaea	p__Thaumarchaeota	c__Soil_Crenarchaeotic_Group_SCG_	o__norank_c__Soil_Crenarchaeotic_Group_SCG_	f__norank_c__Soil_Crenarchaeotic_Group_SCG_	g__norank_c__Soil_Crenarchaeotic_Group_SCG_	s__unclassified_g__norank_c__Soil_Crenarchaeotic_Group_SCG_	OTU239	2699	1997	1303	3237	3018	618	1689	1693	1291	238	94	62	17939
d__Archaea	k__norank_d__Archaea	p__Euryarchaeota	c__Halobacteria	o__Halobacteriales	f__Halobacteriaceae	g__Natronococcus	s__unclassified_g__Natronococcus	OTU2866	1	0	0	0	0	0	1	0	0	0	0	0	2
d__Archaea	k__norank_d__Archaea	p__Thaumarchaeota	c__Soil_Crenarchaeotic_Group_SCG_	o__norank_c__Soil_Crenarchaeotic_Group_SCG_	f__norank_c__Soil_Crenarchaeotic_Group_SCG_	g__norank_c__Soil_Crenarchaeotic_Group_SCG_	s__unclassified_g__norank_c__Soil_Crenarchaeotic_Group_SCG_	OTU2105	197	116	46	97	114	45	135	165	140	30	16	10	1111
d__Archaea	k__norank_d__Archaea	p__Euryarchaeota	c__Thermoplasmata	o__Thermoplasmatales	f__unclassified_o__Thermoplasmatales	g__unclassified_o__Thermoplasmatales	s__unclassified_o__Thermoplasmatales	OTU1734	0	4	0	13	3	0	1	2	4	0	0	0	27
d__Archaea	k__norank_d__Archaea	p__Thaumarchaeota	c__Soil_Crenarchaeotic_Group_SCG_	o__Unknown_Order_c__Soil_Crenarchaeotic_Group_SCG_	f__Unknown_Family_o__Unknown_Order_c__Soil_Crenarchaeotic_Group_SCG_	g__Candidatus_Nitrososphaera	s__unclassified_g__Candidatus_Nitrososphaera	OTU1773	58	27	28	28	33	14	7	24	8	12	4	2	245
d__Archaea	k__norank_d__Archaea	p__Euryarchaeota	c__Thermoplasmata	o__Thermoplasmatales	f__unclassified_o__Thermoplasmatales	g__unclassified_o__Thermoplasmatales	s__unclassified_o__Thermoplasmatales	OTU345	0	1	0	2	1	0	0	0	0	0	0	0	4
d__Archaea	k__norank_d__Archaea	p__Euryarchaeota	c__Thermoplasmata	o__Thermoplasmatales	f__Marine_Group_II	g__norank_f__Marine_Group_II	s__unclassified_g__norank_f__Marine_Group_II	OTU447	6	9	1	77	18	2	7	17	8	0	0	0	145
d__Archaea	k__norank_d__Archaea	p__Thaumarchaeota	c__Soil_Crenarchaeotic_Group_SCG_	o__norank_c__Soil_Crenarchaeotic_Group_SCG_	f__norank_c__Soil_Crenarchaeotic_Group_SCG_	g__norank_c__Soil_Crenarchaeotic_Group_SCG_	s__uncultured_crenarchaeote_g__norank_c__Soil_Crenarchaeotic_Group_SCG_	OTU559	456	382	332	898	455	270	105	172	122	1214	282	324	5012
d__Archaea	k__norank_d__Archaea	p__Euryarchaeota	c__Thermoplasmata	o__Thermoplasmatales	f__Marine_Group_II	g__norank_f__Marine_Group_II	s__uncultured_archaeon_g__norank_f__Marine_Group_II	OTU3013	1	5	0	18	3	0	2	1	1	0	0	0	31
d__Archaea	k__norank_d__Archaea	p__Euryarchaeota	c__Thermoplasmata	o__Thermoplasmatales	f__Marine_Group_II	g__norank_f__Marine_Group_II	s__unclassified_g__norank_f__Marine_Group_II	OTU3095	6	11	0	56	15	0	1	2	4	0	0	0	95
d__Archaea	k__norank_d__Archaea	p__Euryarchaeota	c__Thermoplasmata	o__Thermoplasmatales	f__Marine_Group_II	g__norank_f__Marine_Group_II	s__uncultured_euryarchaeote_g__norank_f__Marine_Group_II	OTU2778	4	22	1	75	22	1	4	2	3	0	0	0	134
d__Archaea	k__norank_d__Archaea	p__Euryarchaeota	c__Thermoplasmata	o__Thermoplasmatales	f__unclassified_o__Thermoplasmatales	g__unclassified_o__Thermoplasmatales	s__unclassified_o__Thermoplasmatales	OTU2682	1	1	0	4	0	0	2	3	1	0	0	0	12
d__Archaea	k__norank_d__Archaea	p__Euryarchaeota	c__Thermoplasmata	o__Thermoplasmatales	f__Marine_Group_II	g__norank_f__Marine_Group_II	s__uncultured_archaeon_g__norank_f__Marine_Group_II	OTU2668	18	115	8	190	64	1	32	16	12	0	0	0	456
d__Archaea	k__norank_d__Archaea	p__Thaumarchaeota	c__Soil_Crenarchaeotic_Group_SCG_	o__norank_c__Soil_Crenarchaeotic_Group_SCG_	f__norank_c__Soil_Crenarchaeotic_Group_SCG_	g__norank_c__Soil_Crenarchaeotic_Group_SCG_	s__uncultured_bacterium_g__norank_c__Soil_Crenarchaeotic_Group_SCG_	OTU2991	5	0	3	6	4	2	0	1	2	0	0	0	23
d__Archaea	k__norank_d__Archaea	p__Euryarchaeota	c__Thermoplasmata	o__Thermoplasmatales	f__Marine_Group_II	g__norank_f__Marine_Group_II	s__uncultured_archaeon_g__norank_f__Marine_Group_II	OTU1462	1	16	1	41	14	0	3	1	0	0	0	0	77
d__Archaea	k__norank_d__Archaea	p__Euryarchaeota	c__Thermoplasmata	o__Thermoplasmatales	f__Marine_Group_II	g__norank_f__Marine_Group_II	s__uncultured_euryarchaeote_g__norank_f__Marine_Group_II	OTU2696	11	20	2	165	63	0	21	40	30	0	0	0	352
d__Archaea	k__norank_d__Archaea	p__Thaumarchaeota	c__Soil_Crenarchaeotic_Group_SCG_	o__norank_c__Soil_Crenarchaeotic_Group_SCG_	f__norank_c__Soil_Crenarchaeotic_Group_SCG_	g__norank_c__Soil_Crenarchaeotic_Group_SCG_	s__unclassified_g__norank_c__Soil_Crenarchaeotic_Group_SCG_	OTU1446	57	29	31	34	42	11	17	17	12	17	6	5	278
d__Archaea	k__norank_d__Archaea	p__Thaumarchaeota	c__Soil_Crenarchaeotic_Group_SCG_	o__norank_c__Soil_Crenarchaeotic_Group_SCG_	f__norank_c__Soil_Crenarchaeotic_Group_SCG_	g__norank_c__Soil_Crenarchaeotic_Group_SCG_	s__unclassified_g__norank_c__Soil_Crenarchaeotic_Group_SCG_	OTU408	1246	407	219	670	681	251	1127	1309	937	142	40	67	7096
d__Archaea	k__norank_d__Archaea	p__Euryarchaeota	c__Thermoplasmata	o__Thermoplasmatales	f__unclassified_o__Thermoplasmatales	g__unclassified_o__Thermoplasmatales	s__unclassified_o__Thermoplasmatales	OTU406	3	4	0	12	5	0	0	4	3	0	0	0	31
d__Archaea	k__norank_d__Archaea	p__Euryarchaeota	c__Thermoplasmata	o__Thermoplasmatales	f__Marine_Group_II	g__norank_f__Marine_Group_II	s__uncultured_archaeon_g__norank_f__Marine_Group_II	OTU3170	6	28	1	79	13	2	14	7	4	0	0	0	154
d__Bacteria	k__norank_d__Bacteria	p__Proteobacteria	c__Alphaproteobacteria	o__Rhodospirillales	f__Rhodospirillales_Incertae_Sedis	g__Candidatus_Alysiosphaera	s__unclassified_g__Candidatus_Alysiosphaera	OTU2623	5	6	3	6	6	13	18	12	4	0	0	0	73
d__Bacteria	k__norank_d__Bacteria	p__Proteobacteria	c__Betaproteobacteria	o__Nitrosomonadales	f__Nitrosomonadaceae	g__norank_f__Nitrosomonadaceae	s__unclassified_g__norank_f__Nitrosomonadaceae	OTU2501	47	41	35	104	69	94	98	40	43	15	3	3	592
d__Bacteria	k__norank_d__Bacteria	p__Proteobacteria	c__Deltaproteobacteria	o__Desulfurellales	f__Desulfurellaceae	g__G55	s__uncultured_Desulfovibrionales_bacterium_g__G55	OTU2698	58	20	20	35	34	30	123	70	41	9	5	8	453
d__Bacteria	k__norank_d__Bacteria	p__Proteobacteria	c__Alphaproteobacteria	o__Rhizobiales	f__Rhizobiales_Incertae_Sedis	g__Phreatobacter	s__unclassified_g__Phreatobacter	OTU1077	0	0	0	5	4	1	1	3	3	2	1	2	22
d__Bacteria	k__norank_d__Bacteria	p__Planctomycetes	c__Planctomycetacia	o__Planctomycetales	f__Planctomycetaceae	g__Pir4_lineage	s__unclassified_g__Pir4_lineage	OTU5	3	1	1	7	1	0	1	0	0	6	1	0	21
d__Bacteria	k__norank_d__Bacteria	p__Chloroflexi	c__Thermomicrobia	o__JG30-KF-CM45	f__norank_o__JG30-KF-CM45	g__norank_o__JG30-KF-CM45	s__unclassified_g__norank_o__JG30-KF-CM45	OTU3252	0	2	0	2	1	1	1	0	2	3	0	0	12
d__Bacteria	k__norank_d__Bacteria	p__Armatimonadetes	c__Armatimonadia	o__Armatimonadales	f__norank_o__Armatimonadales	g__norank_o__Armatimonadales	s__unclassified_g__norank_o__Armatimonadales	OTU643	0	0	0	3	0	3	0	0	0	8	0	0	14
d__Bacteria	k__norank_d__Bacteria	p__Gemmatimonadetes	c__Gemmatimonadetes	o__Gemmatimonadales	f__Gemmatimonadaceae	g__unclassified_f__Gemmatimonadaceae	s__unclassified_f__Gemmatimonadaceae	OTU1195	3	1	2	1	2	0	8	2	5	1	0	0	25
d__Bacteria	k__norank_d__Bacteria	p__Gemmatimonadetes	c__Gemmatimonadetes	o__Gemmatimonadales	f__Gemmatimonadaceae	g__unclassified_f__Gemmatimonadaceae	s__unclassified_f__Gemmatimonadaceae	OTU1199	4	5	5	3	4	4	23	7	9	5	1	2	72
d__Bacteria	k__norank_d__Bacteria	p__Bacteroidetes	c__Sphingobacteriia	o__Sphingobacteriales	f__Chitinophagaceae	g__unclassified_f__Chitinophagaceae	s__unclassified_f__Chitinophagaceae	OTU1935	2	0	0	1	1	0	1	0	1	0	0	0	6
d__Bacteria	k__norank_d__Bacteria	p__Acidobacteria	c__Acidobacteria	o__norank_c__Acidobacteria	f__norank_c__Acidobacteria	g__norank_c__Acidobacteria	s__unclassified_g__norank_c__Acidobacteria	OTU1837	12	4	4	13	5	0	7	12	10	13	3	2	85
d__Bacteria	k__norank_d__Bacteria	p__Actinobacteria	c__Actinobacteria	o__Micromonosporales	f__Micromonosporaceae	g__Asanoa	s__uncultured_bacterium_g__Asanoa	OTU1403	5	0	1	2	0	1	1	3	1	1	1	2	18
d__Bacteria	k__norank_d__Bacteria	p__Gemmatimonadetes	c__Gemmatimonadetes	o__norank_c__Gemmatimonadetes	f__norank_c__Gemmatimonadetes	g__norank_c__Gemmatimonadetes	s__unclassified_g__norank_c__Gemmatimonadetes	OTU1642	4	0	0	10	11	10	2	0	0	0	0	1	38
d__Bacteria	k__norank_d__Bacteria	p__Proteobacteria	c__Alphaproteobacteria	o__Caulobacterales	f__Hyphomonadaceae	g__Hirschia	s__uncultured_bacterium_g__Hirschia	OTU2436	2	0	0	10	2	4	4	0	2	9	8	10	51
d__Bacteria	k__norank_d__Bacteria	p__Armatimonadetes	c__Fimbriimonadia	o__Fimbriimonadales	f__Fimbriimonadaceae	g__norank_f__Fimbriimonadaceae	s__uncultured_bacterium_g__norank_f__Fimbriimonadaceae	OTU3180	0	1	2	8	3	2	2	1	1	3	0	1	24
d__Bacteria	k__norank_d__Bacteria	p__Proteobacteria	c__Alphaproteobacteria	o__Rhizobiales	f__Methylobacteriaceae	g__Microvirga	s__unclassified_g__Microvirga	OTU2602	21	13	5	35	20	28	48	18	28	2	1	1	220
d__Bacteria	k__norank_d__Bacteria	p__Acidobacteria	c__Acidobacteria	o__norank_c__Acidobacteria	f__norank_c__Acidobacteria	g__norank_c__Acidobacteria	s__uncultured_bacterium_293	OTU217	48	10	8	10	6	6	9	15	6	3	0	1	122
d__Bacteria	k__norank_d__Bacteria	p__Proteobacteria	c__Alphaproteobacteria	o__Rhizobiales	f__JG34-KF-361	g__norank_f__JG34-KF-361	s__unclassified_g__norank_f__JG34-KF-361	OTU671	1	2	1	5	2	2	2	2	0	13	2	0	32
d__Bacteria	k__norank_d__Bacteria	p__Planctomycetes	c__Phycisphaerae	o__Tepidisphaerales	f__Tepidisphaeraceae	g__norank_f__Tepidisphaeraceae	s__unclassified_g__norank_f__Tepidisphaeraceae	OTU179	15	7	2	34	10	0	22	14	12	0	0	1	117
d__Bacteria	k__norank_d__Bacteria	p__Bacteroidetes	c__Cytophagia	o__Cytophagales	f__Cytophagaceae	g__Adhaeribacter	s__uncultured_bacterium_g__Adhaeribacter	OTU2109	0	0	0	0	0	0	4	0	0	0	0	0	4
d__Bacteria	k__norank_d__Bacteria	p__Proteobacteria	c__Alphaproteobacteria	o__Sphingomonadales	f__Sphingomonadaceae	g__Sphingomonas	s__unclassified_g__Sphingomonas	OTU599	27	29	17	24	24	50	107	55	38	20	21	18	430
d__Bacteria	k__norank_d__Bacteria	p__Cyanobacteria	c__Cyanobacteria	o__norank_c__Cyanobacteria	f__norank_c__Cyanobacteria	g__norank_c__Cyanobacteria	s__uncultured_diatom	OTU1621	7	1	2	0	2	0	18	0	1	0	0	0	31
d__Bacteria	k__norank_d__Bacteria	p__Proteobacteria	c__Gammaproteobacteria	o__unclassified_c__Gammaproteobacteria	f__unclassified_c__Gammaproteobacteria	g__unclassified_c__Gammaproteobacteria	s__unclassified_c__Gammaproteobacteria	OTU3218	0	1	0	6	8	1	0	0	0	0	0	0	16
d__Bacteria	k__norank_d__Bacteria	p__Armatimonadetes	c__norank_p__Armatimonadetes	o__norank_p__Armatimonadetes	f__norank_p__Armatimonadetes	g__norank_p__Armatimonadetes	s__unclassified_g__norank_p__Armatimonadetes	OTU1388	3	0	0	1	2	2	2	1	2	0	0	0	13
d__Bacteria	k__norank_d__Bacteria	p__Chloroflexi	c__Thermomicrobia	o__JG30-KF-CM45	f__norank_o__JG30-KF-CM45	g__norank_o__JG30-KF-CM45	s__unclassified_g__norank_o__JG30-KF-CM45	OTU2415	5	12	5	9	14	17	9	9	12	118	21	28	259
d__Bacteria	k__norank_d__Bacteria	p__Planctomycetes	c__Planctomycetacia	o__Planctomycetales	f__Planctomycetaceae	g__Pir4_lineage	s__unclassified_g__Pir4_lineage	OTU1152	26	22	17	9	9	2	18	13	15	20	1	8	160
d__Bacteria	k__norank_d__Bacteria	p__Proteobacteria	c__Gammaproteobacteria	o__Xanthomonadales	f__Xanthomonadaceae	g__Lysobacter	s__unclassified_g__Lysobacter	OTU80	18	47	10	33	104	55	22	8	9	2	0	1	309
d__Bacteria	k__norank_d__Bacteria	p__Proteobacteria	c__Alphaproteobacteria	o__Sphingomonadales	f__Sphingomonadaceae	g__Sphingomonas	s__unclassified_g__Sphingomonas	OTU607	56	34	51	47	43	34	78	54	34	93	61	74	659
d__Bacteria	k__norank_d__Bacteria	p__Firmicutes	c__Clostridia	o__Clostridiales	f__Family_XI_o__Clostridiales	g__Tepidimicrobium	s__unclassified_g__Tepidimicrobium	OTU2913	0	0	0	1	0	1	0	0	0	0	0	0	2
d__Bacteria	k__norank_d__Bacteria	p__Planctomycetes	c__Planctomycetacia	o__Planctomycetales	f__Planctomycetaceae	g__Planctomyces	s__uncultured_bacterium_g__Planctomyces	OTU3081	1	1	1	4	3	0	0	0	0	5	0	1	16
d__Bacteria	k__norank_d__Bacteria	p__Chloroflexi	c__TK10	o__norank_c__TK10	f__norank_c__TK10	g__norank_c__TK10	s__unclassified_g__norank_c__TK10	OTU491	13	13	10	24	17	9	12	19	12	4	2	0	135
d__Bacteria	k__norank_d__Bacteria	p__Actinobacteria	c__Actinobacteria	o__Acidimicrobiales	f__norank_o__Acidimicrobiales	g__norank_o__Acidimicrobiales	s__uncultured_actinobacterium_g__norank_o__Acidimicrobiales	OTU594	3	4	6	5	7	5	12	11	4	8	1	7	73
d__Bacteria	k__norank_d__Bacteria	p__Planctomycetes	c__Planctomycetacia	o__Planctomycetales	f__Planctomycetaceae	g__Planctomyces	s__uncultured_bacterium_g__Planctomyces	OTU3086	0	2	1	27	6	0	0	0	0	10	0	1	47
d__Bacteria	k__norank_d__Bacteria	p__Chloroflexi	c__Chloroflexia	o__Chloroflexales	f__Roseiflexaceae	g__Roseiflexus	s__uncultured_bacterium_g__Roseiflexus	OTU40	5	8	3	1	4	5	9	4	6	0	0	0	45
d__Bacteria	k__norank_d__Bacteria	p__Chloroflexi	c__Chloroflexia	o__Chloroflexales	f__Roseiflexaceae	g__Roseiflexus	s__unclassified_g__Roseiflexus	OTU1789	5	2	3	0	0	0	1	0	1	0	0	0	12
d__Bacteria	k__norank_d__Bacteria	p__Actinobacteria	c__Actinobacteria	o__Acidimicrobiales	f__norank_o__Acidimicrobiales	g__norank_o__Acidimicrobiales	s__bacterium_YC-ZSS-LKJ66	OTU665	0	1	2	6	2	1	0	0	0	19	1	4	36
d__Bacteria	k__norank_d__Bacteria	p__Proteobacteria	c__Deltaproteobacteria	o__Myxococcales	f__Polyangiaceae	g__unclassified_f__Polyangiaceae	s__unclassified_f__Polyangiaceae	OTU3046	0	1	1	4	4	5	0	1	0	2	0	0	18
d__Bacteria	k__norank_d__Bacteria	p__Planctomycetes	c__Phycisphaerae	o__Tepidisphaerales	f__Tepidisphaeraceae	g__norank_f__Tepidisphaeraceae	s__uncultured_bacterium_g__norank_f__Tepidisphaeraceae	OTU2814	27	16	23	73	19	0	42	39	35	3	0	0	277
d__Bacteria	k__norank_d__Bacteria	p__Proteobacteria	c__Alphaproteobacteria	o__unclassified_c__Alphaproteobacteria	f__unclassified_c__Alphaproteobacteria	g__unclassified_c__Alphaproteobacteria	s__unclassified_c__Alphaproteobacteria	OTU2637	27	12	15	56	25	48	35	20	10	26	9	12	295
d__Bacteria	k__norank_d__Bacteria	p__Proteobacteria	c__Betaproteobacteria	o__unclassified_c__Betaproteobacteria	f__unclassified_c__Betaproteobacteria	g__unclassified_c__Betaproteobacteria	s__unclassified_c__Betaproteobacteria	OTU1203	6	2	4	2	4	7	2	2	1	0	0	0	30
d__Bacteria	k__norank_d__Bacteria	p__Proteobacteria	c__Deltaproteobacteria	o__Myxococcales	f__27F-1492R	g__norank_f__27F-1492R	s__uncultured_bacterium_g__norank_f__27F-1492R	OTU3255	0	0	0	2	1	1	0	1	0	0	0	0	5
d__Bacteria	k__norank_d__Bacteria	p__Latescibacteria	c__norank_p__Latescibacteria	o__norank_p__Latescibacteria	f__norank_p__Latescibacteria	g__norank_p__Latescibacteria	s__unclassified_g__norank_p__Latescibacteria	OTU2166	12	4	9	2	6	1	3	5	5	0	0	0	47
d__Bacteria	k__norank_d__Bacteria	p__Chloroflexi	c__Ktedonobacteria	o__C0119	f__norank_o__C0119	g__norank_o__C0119	s__unclassified_g__norank_o__C0119	OTU1512	3	0	0	0	1	1	2	0	1	0	0	0	8
d__Bacteria	k__norank_d__Bacteria	p__Actinobacteria	c__Actinobacteria	o__Corynebacteriales	f__Nocardiaceae	g__Rhodococcus	s__unclassified_g__Rhodococcus	OTU889	1	2	2	3	2	3	4	3	2	16	15	18	71
d__Bacteria	k__norank_d__Bacteria	p__Planctomycetes	c__Planctomycetacia	o__Planctomycetales	f__Planctomycetaceae	g__norank_f__Planctomycetaceae	s__uncultured_prokaryote_g__norank_f__Planctomycetaceae	OTU2292	27	11	15	2	5	0	14	9	11	0	0	0	94
d__Bacteria	k__norank_d__Bacteria	p__Actinobacteria	c__Actinobacteria	o__Rubrobacterales	f__Rubrobacteriaceae	g__Rubrobacter	s__unclassified_g__Rubrobacter	OTU2795	361	35	104	87	63	14	401	106	243	30	7	17	1468
d__Bacteria	k__norank_d__Bacteria	p__Proteobacteria	c__Deltaproteobacteria	o__Bdellovibrionales	f__Bdellovibrionaceae	g__OM27_clade	s__uncultured_microorganism_g__OM27_clade	OTU3126	0	0	0	5	0	1	0	0	1	0	0	0	7
d__Bacteria	k__norank_d__Bacteria	p__Chloroflexi	c__Gitt-GS-136	o__norank_c__Gitt-GS-136	f__norank_c__Gitt-GS-136	g__norank_c__Gitt-GS-136	s__unclassified_g__norank_c__Gitt-GS-136	OTU2482	203	137	131	115	143	40	63	97	114	463	146	230	1882
d__Bacteria	k__norank_d__Bacteria	p__Chloroflexi	c__Chloroflexia	o__Herpetosiphonales	f__Herpetosiphonaceae	g__Herpetosiphon	s__uncultured_bacterium_g__Herpetosiphon	OTU736	2	4	1	2	2	0	7	5	2	3	2	3	33
d__Bacteria	k__norank_d__Bacteria	p__Proteobacteria	c__Deltaproteobacteria	o__Myxococcales	f__Nannocystaceae	g__Nannocystis	s__unclassified_g__Nannocystis	OTU1857	0	0	0	0	0	0	4	2	1	0	0	0	7
d__Bacteria	k__norank_d__Bacteria	p__Proteobacteria	c__Deltaproteobacteria	o__Myxococcales	f__Sandaracinaceae	g__Sandaracinus	s__uncultured_bacterium_g__Sandaracinus	OTU1892	5	5	4	2	1	3	3	2	4	0	2	4	35
d__Bacteria	k__norank_d__Bacteria	p__Proteobacteria	c__Gammaproteobacteria	o__Xanthomonadales	f__Xanthomonadales_Incertae_Sedis	g__Steroidobacter	s__unclassified_g__Steroidobacter	OTU1932	134	118	94	319	183	215	222	117	83	123	87	80	1775
d__Bacteria	k__norank_d__Bacteria	p__Actinobacteria	c__Actinobacteria	o__norank_c__Actinobacteria	f__norank_c__Actinobacteria	g__norank_c__Actinobacteria	s__uncultured_bacterium_g__norank_c__Actinobacteria	OTU1038	2	0	1	1	0	0	13	1	11	5	0	4	38
d__Bacteria	k__norank_d__Bacteria	p__Verrucomicrobia	c__OPB35_soil_group	o__norank_c__OPB35_soil_group	f__norank_c__OPB35_soil_group	g__norank_c__OPB35_soil_group	s__unclassified_g__norank_c__OPB35_soil_group	OTU298	9	1	0	1	1	0	2	3	0	0	0	1	18
d__Bacteria	k__norank_d__Bacteria	p__Proteobacteria	c__Alphaproteobacteria	o__Rhizobiales	f__Rhodobiaceae	g__norank_f__Rhodobiaceae	s__uncultured_Rhodobiaceae_bacterium_g__norank_f__Rhodobiaceae	OTU1057	7	12	5	20	12	13	12	14	10	5	5	2	117
d__Bacteria	k__norank_d__Bacteria	p__Proteobacteria	c__Alphaproteobacteria	o__Rhodospirillales	f__Acetobacteraceae	g__norank_f__Acetobacteraceae	s__uncultured_Paracraurococcus_sp.	OTU902	0	0	6	2	2	3	3	2	3	42	33	27	123
d__Bacteria	k__norank_d__Bacteria	p__Acidobacteria	c__Acidobacteria	o__norank_c__Acidobacteria	f__norank_c__Acidobacteria	g__norank_c__Acidobacteria	s__unclassified_g__norank_c__Acidobacteria	OTU2971	12	9	1	3	3	0	10	2	7	1	2	0	50
d__Bacteria	k__norank_d__Bacteria	p__Chloroflexi	c__Chloroflexia	o__Chloroflexales	f__Roseiflexaceae	g__Roseiflexus	s__uncultured_Chloroflexi_bacterium_g__Roseiflexus	OTU2586	13	6	3	3	11	1	25	19	9	0	0	0	90
d__Bacteria	k__norank_d__Bacteria	p__Chloroflexi	c__TK10	o__norank_c__TK10	f__norank_c__TK10	g__norank_c__TK10	s__uncultured_bacterium_g__norank_c__TK10	OTU1453	1	2	0	3	6	3	7	17	11	0	0	0	50
d__Bacteria	k__norank_d__Bacteria	p__Chloroflexi	c__SBR2076	o__norank_c__SBR2076	f__norank_c__SBR2076	g__norank_c__SBR2076	s__unclassified_g__norank_c__SBR2076	OTU509	3	2	1	0	1	0	1	1	0	0	0	0	9
d__Bacteria	k__norank_d__Bacteria	p__Chloroflexi	c__Thermomicrobia	o__AKYG1722	f__norank_o__AKYG1722	g__norank_o__AKYG1722	s__unclassified_g__norank_o__AKYG1722	OTU299	26	83	20	41	67	53	25	25	8	77	34	31	490
d__Bacteria	k__norank_d__Bacteria	p__Planctomycetes	c__Planctomycetacia	o__Planctomycetales	f__Planctomycetaceae	g__norank_f__Planctomycetaceae	s__unclassified_g__norank_f__Planctomycetaceae	OTU2760	0	1	0	2	2	0	1	1	0	0	0	0	7
d__Bacteria	k__norank_d__Bacteria	p__Chlorobi	c__Chlorobia	o__Chlorobiales	f__OPB56	g__norank_f__OPB56	s__uncultured_bacterium_0319-6E22	OTU2458	7	2	5	3	4	5	8	4	2	4	1	1	46
d__Bacteria	k__norank_d__Bacteria	p__Planctomycetes	c__Planctomycetacia	o__Planctomycetales	f__Planctomycetaceae	g__norank_f__Planctomycetaceae	s__uncultured_bacterium_g__norank_f__Planctomycetaceae	OTU1082	0	2	0	2	1	1	3	3	2	0	0	0	14
d__Bacteria	k__norank_d__Bacteria	p__Firmicutes	c__Bacilli	o__Bacillales	f__Thermoactinomycetaceae	g__Planifilum	s__unclassified_g__Planifilum	OTU2351	34	31	10	37	43	46	18	53	27	0	0	0	299
d__Bacteria	k__norank_d__Bacteria	p__Proteobacteria	c__Alphaproteobacteria	o__Rhizobiales	f__Rhodobiaceae	g__Methyloceanibacter	s__uncultured_bacterium_g__Methyloceanibacter	OTU2098	0	1	0	2	2	0	1	0	0	0	0	0	6
d__Bacteria	k__norank_d__Bacteria	p__Actinobacteria	c__Actinobacteria	o__Gaiellales	f__norank_o__Gaiellales	g__norank_o__Gaiellales	s__unclassified_g__norank_o__Gaiellales	OTU1476	1	1	4	4	3	3	13	3	5	1	0	1	39
d__Bacteria	k__norank_d__Bacteria	p__Acidobacteria	c__Acidobacteria	o__norank_c__Acidobacteria	f__norank_c__Acidobacteria	g__norank_c__Acidobacteria	s__unclassified_g__norank_c__Acidobacteria	OTU729	14	12	12	13	3	2	5	10	3	12	6	6	98
d__Bacteria	k__norank_d__Bacteria	p__unclassified_k__norank_d__Bacteria	c__unclassified_k__norank_d__Bacteria	o__unclassified_k__norank_d__Bacteria	f__unclassified_k__norank_d__Bacteria	g__unclassified_k__norank_d__Bacteria	s__unclassified_k__norank_d__Bacteria	OTU3217	0	0	0	0	2	0	0	0	1	0	0	0	3
d__Bacteria	k__norank_d__Bacteria	p__Chloroflexi	c__Anaerolineae	o__Anaerolineales	f__Anaerolineaceae	g__norank_f__Anaerolineaceae	s__uncultured_gamma_proteobacterium_g__norank_f__Anaerolineaceae	OTU3271	1	5	0	0	5	2	0	0	0	0	0	0	13
d__Bacteria	k__norank_d__Bacteria	p__Proteobacteria	c__Deltaproteobacteria	o__Myxococcales	f__Polyangiaceae	g__Sorangium	s__unclassified_g__Sorangium	OTU1356	6	1	2	3	5	6	7	5	0	0	0	0	35
d__Bacteria	k__norank_d__Bacteria	p__Actinobacteria	c__Actinobacteria	o__norank_c__Actinobacteria	f__norank_c__Actinobacteria	g__norank_c__Actinobacteria	s__uncultured_bacterium_0425-2M17	OTU1231	5	0	0	3	9	0	1	11	3	3	0	1	36
d__Bacteria	k__norank_d__Bacteria	p__Chloroflexi	c__KD4-96	o__norank_c__KD4-96	f__norank_c__KD4-96	g__norank_c__KD4-96	s__unclassified_g__norank_c__KD4-96	OTU958	268	127	200	74	79	33	83	87	147	99	34	52	1283
d__Bacteria	k__norank_d__Bacteria	p__Proteobacteria	c__Alphaproteobacteria	o__Sphingomonadales	f__Sphingomonadaceae	g__Novosphingobium	s__Novosphingobium_aromaticivorans	OTU525	0	1	5	5	2	4	1	1	0	12	24	11	66
d__Bacteria	k__norank_d__Bacteria	p__Acidobacteria	c__Acidobacteria	o__unclassified_c__Acidobacteria	f__unclassified_c__Acidobacteria	g__unclassified_c__Acidobacteria	s__unclassified_c__Acidobacteria	OTU1385	4	1	2	0	0	0	0	1	0	0	0	0	8
d__Bacteria	k__norank_d__Bacteria	p__Chloroflexi	c__Chloroflexia	o__Kallotenuales	f__AKIW781	g__norank_f__AKIW781	s__uncultured_bacterium_g__norank_f__AKIW781	OTU2285	2	3	0	12	10	11	2	5	2	3	1	1	52
d__Bacteria	k__norank_d__Bacteria	p__Chloroflexi	c__Caldilineae	o__Caldilineales	f__Caldilineaceae	g__norank_f__Caldilineaceae	s__unclassified_g__norank_f__Caldilineaceae	OTU31	1	1	2	3	1	1	0	0	0	0	0	0	9
d__Bacteria	k__norank_d__Bacteria	p__Planctomycetes	c__OM190	o__norank_c__OM190	f__norank_c__OM190	g__norank_c__OM190	s__planctomycete_A-2	OTU479	0	2	2	0	0	0	3	0	0	0	0	0	7
d__Bacteria	k__norank_d__Bacteria	p__Chloroflexi	c__unclassified_p__Chloroflexi	o__unclassified_p__Chloroflexi	f__unclassified_p__Chloroflexi	g__unclassified_p__Chloroflexi	s__unclassified_p__Chloroflexi	OTU139	2	0	0	0	0	0	0	0	0	0	0	0	2
d__Bacteria	k__norank_d__Bacteria	p__Actinobacteria	c__Actinobacteria	o__Acidimicrobiales	f__unclassified_o__Acidimicrobiales	g__unclassified_o__Acidimicrobiales	s__unclassified_o__Acidimicrobiales	OTU585	2	0	0	1	5	10	5	3	4	2	1	0	33
d__Bacteria	k__norank_d__Bacteria	p__Actinobacteria	c__Actinobacteria	o__Acidimicrobiales	f__norank_o__Acidimicrobiales	g__norank_o__Acidimicrobiales	s__unclassified_g__norank_o__Acidimicrobiales	OTU103	14	8	14	5	5	7	9	8	4	0	0	0	74
d__Bacteria	k__norank_d__Bacteria	p__Chloroflexi	c__Chloroflexia	o__Chloroflexales	f__Roseiflexaceae	g__Roseiflexus	s__uncultured_Chloroflexi_bacterium_g__Roseiflexus	OTU1011	10	8	5	9	11	3	11	12	11	0	0	0	80
d__Bacteria	k__norank_d__Bacteria	p__Acidobacteria	c__Acidobacteria	o__norank_c__Acidobacteria	f__norank_c__Acidobacteria	g__norank_c__Acidobacteria	s__uncultured_bacterium_gp6	OTU461	129	65	69	146	39	11	104	85	74	19	6	13	760
d__Bacteria	k__norank_d__Bacteria	p__Proteobacteria	c__Alphaproteobacteria	o__Rhizobiales	f__Hyphomicrobiaceae	g__Pedomicrobium	s__uncultured_bacterium_g__Pedomicrobium	OTU481	0	8	0	0	0	1	0	0	0	3	3	4	19
d__Bacteria	k__norank_d__Bacteria	p__Proteobacteria	c__Deltaproteobacteria	o__Bdellovibrionales	f__Bdellovibrionaceae	g__OM27_clade	s__unclassified_g__OM27_clade	OTU2146	2	1	0	4	3	7	9	1	2	0	0	0	29
d__Bacteria	k__norank_d__Bacteria	p__Chloroflexi	c__Anaerolineae	o__Anaerolineales	f__Anaerolineaceae	g__norank_f__Anaerolineaceae	s__unclassified_g__norank_f__Anaerolineaceae	OTU2197	6	5	0	2	4	0	6	7	3	0	0	0	33
d__Bacteria	k__norank_d__Bacteria	p__Firmicutes	c__Bacilli	o__Bacillales	f__Paenibacillaceae	g__unclassified_f__Paenibacillaceae	s__unclassified_f__Paenibacillaceae	OTU1291	1	3	0	5	4	3	4	2	2	0	0	0	24
d__Bacteria	k__norank_d__Bacteria	p__Chloroflexi	c__Chloroflexia	o__Chloroflexales	f__Roseiflexaceae	g__Roseiflexus	s__uncultured_bacterium_g__Roseiflexus	OTU1279	1	1	0	3	1	0	0	8	1	0	0	0	15
d__Bacteria	k__norank_d__Bacteria	p__Chloroflexi	c__Chloroflexia	o__Chloroflexales	f__Roseiflexaceae	g__Roseiflexus	s__uncultured_bacterium_g__Roseiflexus	OTU1278	15	10	2	17	30	10	35	53	18	7	0	3	200
d__Bacteria	k__norank_d__Bacteria	p__Proteobacteria	c__Alphaproteobacteria	o__Rhodospirillales	f__Rhodospirillales_Incertae_Sedis	g__Candidatus_Alysiosphaera	s__unclassified_g__Candidatus_Alysiosphaera	OTU2584	28	20	10	25	31	21	41	26	26	3	2	2	235
d__Bacteria	k__norank_d__Bacteria	p__Proteobacteria	c__Alphaproteobacteria	o__Rhizobiales	f__unclassified_o__Rhizobiales	g__unclassified_o__Rhizobiales	s__unclassified_o__Rhizobiales	OTU836	0	0	0	0	0	0	0	0	0	0	2	0	2
d__Bacteria	k__norank_d__Bacteria	p__Planctomycetes	c__Planctomycetacia	o__Planctomycetales	f__Planctomycetaceae	g__Pir4_lineage	s__unclassified_g__Pir4_lineage	OTU1373	2	0	1	0	1	0	0	1	0	0	0	0	5
d__Bacteria	k__norank_d__Bacteria	p__Gemmatimonadetes	c__Gemmatimonadetes	o__norank_c__Gemmatimonadetes	f__norank_c__Gemmatimonadetes	g__norank_c__Gemmatimonadetes	s__uncultured_soil_bacterium_g__norank_c__Gemmatimonadetes	OTU432	0	1	2	2	1	1	0	2	0	0	0	0	9
d__Bacteria	k__norank_d__Bacteria	p__Chloroflexi	c__P2-11E	o__norank_c__P2-11E	f__norank_c__P2-11E	g__norank_c__P2-11E	s__uncultured_bacterium_g__norank_c__P2-11E	OTU2183	2	0	1	0	1	0	1	0	1	1	1	0	8
d__Bacteria	k__norank_d__Bacteria	p__Chloroflexi	c__Chloroflexia	o__Chloroflexales	f__Roseiflexaceae	g__Roseiflexus	s__unclassified_g__Roseiflexus	OTU495	2	5	0	5	11	11	1	1	0	0	1	0	37
d__Bacteria	k__norank_d__Bacteria	p__Bacteroidetes	c__Sphingobacteriia	o__Sphingobacteriales	f__env.OPS_17	g__norank_f__env.OPS_17	s__unclassified_g__norank_f__env.OPS_17	OTU192	2	0	1	1	0	0	2	0	0	0	0	0	6
d__Bacteria	k__norank_d__Bacteria	p__Planctomycetes	c__Planctomycetacia	o__Planctomycetales	f__Planctomycetaceae	g__Gemmata	s__unclassified_g__Gemmata	OTU2040	0	1	0	0	1	0	5	2	0	1	0	0	10
d__Bacteria	k__norank_d__Bacteria	p__Chlamydiae	c__Chlamydiae	o__Chlamydiales	f__Parachlamydiaceae	g__unclassified_f__Parachlamydiaceae	s__unclassified_f__Parachlamydiaceae	OTU2432	1	0	1	0	1	0	3	0	0	0	0	0	6
d__Bacteria	k__norank_d__Bacteria	p__Planctomycetes	c__Planctomycetacia	o__Planctomycetales	f__Planctomycetaceae	g__Pirellula	s__unclassified_g__Pirellula	OTU2615	2	2	0	8	5	0	2	0	1	0	0	0	20
d__Bacteria	k__norank_d__Bacteria	p__Chloroflexi	c__Thermomicrobia	o__AKYG1722	f__norank_o__AKYG1722	g__norank_o__AKYG1722	s__unclassified_g__norank_o__AKYG1722	OTU748	0	0	0	0	0	0	0	0	0	15	12	10	37
d__Bacteria	k__norank_d__Bacteria	p__Acidobacteria	c__Acidobacteria	o__unclassified_c__Acidobacteria	f__unclassified_c__Acidobacteria	g__unclassified_c__Acidobacteria	s__unclassified_c__Acidobacteria	OTU1095	2	2	3	2	0	0	4	0	1	0	0	0	14
d__Bacteria	k__norank_d__Bacteria	p__Gemmatimonadetes	c__Gemmatimonadetes	o__norank_c__Gemmatimonadetes	f__norank_c__Gemmatimonadetes	g__norank_c__Gemmatimonadetes	s__unclassified_g__norank_c__Gemmatimonadetes	OTU2522	7	3	6	11	11	17	14	13	11	1	1	0	95
d__Bacteria	k__norank_d__Bacteria	p__Chloroflexi	c__JG30-KF-CM66	o__norank_c__JG30-KF-CM66	f__norank_c__JG30-KF-CM66	g__norank_c__JG30-KF-CM66	s__unclassified_g__norank_c__JG30-KF-CM66	OTU1368	1	0	0	1	0	0	0	2	1	2	0	0	7
d__Bacteria	k__norank_d__Bacteria	p__Bacteroidetes	c__Sphingobacteriia	o__Sphingobacteriales	f__Chitinophagaceae	g__norank_f__Chitinophagaceae	s__unclassified_g__norank_f__Chitinophagaceae	OTU120	0	1	1	3	2	2	1	0	0	5	1	0	16
d__Bacteria	k__norank_d__Bacteria	p__Chloroflexi	c__Thermomicrobia	o__JG30-KF-CM45	f__norank_o__JG30-KF-CM45	g__norank_o__JG30-KF-CM45	s__unclassified_g__norank_o__JG30-KF-CM45	OTU475	0	4	0	3	1	7	1	4	0	0	0	0	20
d__Bacteria	k__norank_d__Bacteria	p__Proteobacteria	c__Betaproteobacteria	o__SC-I-84	f__norank_o__SC-I-84	g__norank_o__SC-I-84	s__unclassified_g__norank_o__SC-I-84	OTU2416	13	3	4	8	12	5	38	20	8	5	6	8	130
d__Bacteria	k__norank_d__Bacteria	p__Proteobacteria	c__Deltaproteobacteria	o__NB1-j	f__norank_o__NB1-j	g__norank_o__NB1-j	s__unclassified_g__norank_o__NB1-j	OTU1544	4	0	1	2	5	5	4	5	4	0	0	0	30
d__Bacteria	k__norank_d__Bacteria	p__Acidobacteria	c__Acidobacteria	o__norank_c__Acidobacteria	f__norank_c__Acidobacteria	g__norank_c__Acidobacteria	s__unclassified_g__norank_c__Acidobacteria	OTU466	6	9	3	10	2	0	5	10	5	6	1	0	57
d__Bacteria	k__norank_d__Bacteria	p__Proteobacteria	c__Alphaproteobacteria	o__Rhodospirillales	f__Acetobacteraceae	g__Craurococcus	s__unclassified_g__Craurococcus	OTU1864	3	2	0	1	1	1	6	1	2	1	0	0	18
d__Bacteria	k__norank_d__Bacteria	p__Actinobacteria	c__Actinobacteria	o__Frankiales	f__Geodermatophilaceae	g__Geodermatophilus	s__unclassified_g__Geodermatophilus	OTU701	20	13	17	80	47	73	25	44	19	213	86	120	757
d__Bacteria	k__norank_d__Bacteria	p__Proteobacteria	c__Betaproteobacteria	o__SC-I-84	f__norank_o__SC-I-84	g__norank_o__SC-I-84	s__unclassified_g__norank_o__SC-I-84	OTU1764	0	1	1	2	1	3	3	3	2	1	2	1	20
d__Bacteria	k__norank_d__Bacteria	p__Acidobacteria	c__Acidobacteria	o__norank_c__Acidobacteria	f__norank_c__Acidobacteria	g__norank_c__Acidobacteria	s__unclassified_g__norank_c__Acidobacteria	OTU469	27	23	9	159	30	0	10	17	7	6	3	5	296
d__Bacteria	k__norank_d__Bacteria	p__Actinobacteria	c__Actinobacteria	o__Streptomycetales	f__Streptomycetaceae	g__unclassified_f__Streptomycetaceae	s__unclassified_f__Streptomycetaceae	OTU606	0	0	0	0	0	0	1	0	0	8	3	1	13
d__Bacteria	k__norank_d__Bacteria	p__Acidobacteria	c__Acidobacteria	o__norank_c__Acidobacteria	f__norank_c__Acidobacteria	g__norank_c__Acidobacteria	s__uncultured_Geoalkalibacter_sp._g__norank_c__Acidobacteria	OTU37	88	36	19	25	25	4	33	22	28	9	4	5	298
d__Bacteria	k__norank_d__Bacteria	p__Proteobacteria	c__Alphaproteobacteria	o__Rhodospirillales	f__MSB-1E8	g__norank_f__MSB-1E8	s__unclassified_g__norank_f__MSB-1E8	OTU1051	3	4	0	2	4	6	10	3	4	4	2	0	42
d__Bacteria	k__norank_d__Bacteria	p__Chloroflexi	c__Caldilineae	o__Caldilineales	f__Caldilineaceae	g__norank_f__Caldilineaceae	s__uncultured_bacterium_g__norank_f__Caldilineaceae	OTU1293	3	3	2	1	7	0	3	2	0	1	0	0	22
d__Bacteria	k__norank_d__Bacteria	p__Firmicutes	c__Clostridia	o__Clostridiales	f__Heliobacteriaceae	g__Hydrogenispora	s__uncultured_Clostridium_sp._g__Hydrogenispora	OTU3015	1	0	1	2	0	0	0	0	0	0	0	0	4
d__Bacteria	k__norank_d__Bacteria	p__Planctomycetes	c__Planctomycetacia	o__Planctomycetales	f__Planctomycetaceae	g__norank_f__Planctomycetaceae	s__uncultured_soil_bacterium_g__norank_f__Planctomycetaceae	OTU2020	31	16	11	14	14	2	9	8	8	4	2	1	120
d__Bacteria	k__norank_d__Bacteria	p__Actinobacteria	c__Actinobacteria	o__Micromonosporales	f__Micromonosporaceae	g__Micromonospora	s__unclassified_g__Micromonospora	OTU601	38	35	32	74	43	39	92	45	52	128	103	90	771
d__Bacteria	k__norank_d__Bacteria	p__Firmicutes	c__Bacilli	o__Bacillales	f__Bacillaceae	g__Bacillus	s__unclassified_g__Bacillus	OTU1079	2	4	3	22	9	21	18	5	10	1	0	2	97
d__Bacteria	k__norank_d__Bacteria	p__Verrucomicrobia	c__S-BQ2-57_soil_group	o__norank_c__S-BQ2-57_soil_group	f__norank_c__S-BQ2-57_soil_group	g__norank_c__S-BQ2-57_soil_group	s__uncultured_bacterium_g__norank_c__S-BQ2-57_soil_group	OTU2704	0	0	1	0	1	0	1	0	0	0	0	0	3
d__Bacteria	k__norank_d__Bacteria	p__Gemmatimonadetes	c__Gemmatimonadetes	o__Gemmatimonadales	f__Gemmatimonadaceae	g__unclassified_f__Gemmatimonadaceae	s__unclassified_f__Gemmatimonadaceae	OTU83	3	3	1	1	1	0	4	2	0	2	0	1	18
d__Bacteria	k__norank_d__Bacteria	p__Actinobacteria	c__Actinobacteria	o__Solirubrobacterales	f__Elev-16S-1332	g__norank_f__Elev-16S-1332	s__uncultured_actinobacterium_g__norank_f__Elev-16S-1332	OTU635	0	0	1	1	3	1	2	2	0	13	5	5	33
d__Bacteria	k__norank_d__Bacteria	p__Chloroflexi	c__Chloroflexia	o__Chloroflexales	f__Chloroflexaceae	g__Chloronema	s__uncultured_bacterium_g__Chloronema	OTU2041	0	1	0	0	1	0	1	3	0	0	0	0	6
d__Bacteria	k__norank_d__Bacteria	p__Proteobacteria	c__Deltaproteobacteria	o__Oligoflexales	f__Oligoflexaceae	g__norank_f__Oligoflexaceae	s__uncultured_bacterium_g__norank_f__Oligoflexaceae	OTU1910	1	1	1	0	2	3	2	2	0	3	0	3	18
d__Bacteria	k__norank_d__Bacteria	p__Firmicutes	c__Limnochordia	o__Limnochordales	f__Limnochordaceae	g__norank_f__Limnochordaceae	s__uncultured_compost_bacterium_g__norank_f__Limnochordaceae	OTU1213	0	0	0	2	3	0	0	0	4	0	0	0	9
d__Bacteria	k__norank_d__Bacteria	p__Actinobacteria	c__Actinobacteria	o__Solirubrobacterales	f__unclassified_o__Solirubrobacterales	g__unclassified_o__Solirubrobacterales	s__unclassified_o__Solirubrobacterales	OTU535	6	3	7	15	6	9	11	4	3	17	11	10	102
d__Bacteria	k__norank_d__Bacteria	p__Actinobacteria	c__Actinobacteria	o__Gaiellales	f__Gaiellaceae	g__Gaiella	s__unclassified_g__Gaiella	OTU735	24	9	8	24	13	32	81	40	38	36	17	31	353
d__Bacteria	k__norank_d__Bacteria	p__Gemmatimonadetes	c__Gemmatimonadetes	o__Gemmatimonadales	f__Gemmatimonadaceae	g__Gemmatimonas	s__unclassified_g__Gemmatimonas	OTU1143	1	3	0	0	1	0	0	0	1	0	0	0	6
d__Bacteria	k__norank_d__Bacteria	p__Proteobacteria	c__Gammaproteobacteria	o__Xanthomonadales	f__Xanthomonadaceae	g__Luteimonas	s__unclassified_g__Luteimonas	OTU335	0	3	0	0	0	0	0	0	0	3	1	1	8
d__Bacteria	k__norank_d__Bacteria	p__Planctomycetes	c__Planctomycetacia	o__Planctomycetales	f__Planctomycetaceae	g__norank_f__Planctomycetaceae	s__unclassified_g__norank_f__Planctomycetaceae	OTU162	4	1	0	1	0	0	0	0	1	0	0	0	7
d__Bacteria	k__norank_d__Bacteria	p__Planctomycetes	c__Phycisphaerae	o__Phycisphaerales	f__Phycisphaeraceae	g__SM1A02	s__uncultured_prokaryote_g__SM1A02	OTU381	0	1	0	0	1	0	0	1	0	0	0	0	3
d__Bacteria	k__norank_d__Bacteria	p__Proteobacteria	c__Deltaproteobacteria	o__Myxococcales	f__Sandaracinaceae	g__norank_f__Sandaracinaceae	s__uncultured_bacterium_g__norank_f__Sandaracinaceae	OTU2933	0	0	1	1	2	4	2	2	1	1	0	7	21
d__Bacteria	k__norank_d__Bacteria	p__Planctomycetes	c__Planctomycetacia	o__Planctomycetales	f__Planctomycetaceae	g__Planctomyces	s__unclassified_g__Planctomyces	OTU1838	14	8	6	39	10	0	12	13	7	4	3	1	117
d__Bacteria	k__norank_d__Bacteria	p__Planctomycetes	c__Planctomycetacia	o__Planctomycetales	f__Planctomycetaceae	g__norank_f__Planctomycetaceae	s__unclassified_g__norank_f__Planctomycetaceae	OTU506	5	6	3	21	1	0	3	0	1	0	1	0	41
d__Bacteria	k__norank_d__Bacteria	p__Proteobacteria	c__Betaproteobacteria	o__Burkholderiales	f__unclassified_o__Burkholderiales	g__unclassified_o__Burkholderiales	s__unclassified_o__Burkholderiales	OTU641	1	0	0	0	0	0	0	1	0	1	0	0	3
d__Bacteria	k__norank_d__Bacteria	p__Chloroflexi	c__Chloroflexia	o__Chloroflexales	f__FFCH7168	g__norank_f__FFCH7168	s__uncultured_bacterium_g__norank_f__FFCH7168	OTU43	1	0	2	2	5	0	2	2	2	0	0	0	16
d__Bacteria	k__norank_d__Bacteria	p__Acidobacteria	c__Acidobacteria	o__Solibacterales	f__Solibacteraceae__Subgroup_3_	g__Bryobacter	s__unclassified_g__Bryobacter	OTU2290	2	4	2	5	4	4	24	2	1	0	0	0	48
d__Bacteria	k__norank_d__Bacteria	p__Verrucomicrobia	c__OPB35_soil_group	o__norank_c__OPB35_soil_group	f__norank_c__OPB35_soil_group	g__norank_c__OPB35_soil_group	s__uncultured_bacterium_g__norank_c__OPB35_soil_group	OTU2103	2	0	0	0	0	0	2	0	0	0	0	0	4
d__Bacteria	k__norank_d__Bacteria	p__Actinobacteria	c__Actinobacteria	o__Acidimicrobiales	f__norank_o__Acidimicrobiales	g__norank_o__Acidimicrobiales	s__unclassified_g__norank_o__Acidimicrobiales	OTU2536	6	2	2	9	4	2	6	3	2	0	0	0	36
d__Bacteria	k__norank_d__Bacteria	p__Firmicutes	c__Bacilli	o__Bacillales	f__Bacillaceae	g__Bacillus	s__unclassified_g__Bacillus	OTU1187	4	0	1	2	4	5	5	3	5	7	3	5	44
d__Bacteria	k__norank_d__Bacteria	p__Gemmatimonadetes	c__Gemmatimonadetes	o__Gemmatimonadales	f__Gemmatimonadaceae	g__unclassified_f__Gemmatimonadaceae	s__unclassified_f__Gemmatimonadaceae	OTU259	1	0	1	4	4	4	5	3	0	5	3	2	32
d__Bacteria	k__norank_d__Bacteria	p__unclassified_k__norank_d__Bacteria	c__unclassified_k__norank_d__Bacteria	o__unclassified_k__norank_d__Bacteria	f__unclassified_k__norank_d__Bacteria	g__unclassified_k__norank_d__Bacteria	s__unclassified_k__norank_d__Bacteria	OTU1982	5	3	1	3	2	0	4	6	0	0	0	0	24
d__Bacteria	k__norank_d__Bacteria	p__Planctomycetes	c__Phycisphaerae	o__Phycisphaerales	f__Phycisphaeraceae	g__AKYG587	s__uncultured_bacterium_g__AKYG587	OTU2736	2	6	5	1	3	2	8	9	1	0	0	0	37
d__Bacteria	k__norank_d__Bacteria	p__Firmicutes	c__Bacilli	o__Bacillales	f__Paenibacillaceae	g__Paenibacillus	s__Paenibacillus_alginolyticus	OTU2148	7	3	2	2	6	10	11	10	5	12	5	12	85
d__Bacteria	k__norank_d__Bacteria	p__Proteobacteria	c__Deltaproteobacteria	o__Myxococcales	f__mle1-27	g__norank_f__mle1-27	s__unclassified_g__norank_f__mle1-27	OTU1729	0	0	0	1	0	0	5	1	0	0	0	0	7
d__Bacteria	k__norank_d__Bacteria	p__Actinobacteria	c__Actinobacteria	o__Solirubrobacterales	f__Solirubrobacteraceae	g__Solirubrobacter	s__uncultured_bacterium_g__Solirubrobacter	OTU876	0	0	0	1	1	0	0	0	0	3	3	3	11
d__Bacteria	k__norank_d__Bacteria	p__Planctomycetes	c__Phycisphaerae	o__mle1-8	f__norank_o__mle1-8	g__norank_o__mle1-8	s__uncultured_bacterium_g__norank_o__mle1-8	OTU176	3	1	1	1	3	0	0	2	1	0	0	0	12
d__Bacteria	k__norank_d__Bacteria	p__Chloroflexi	c__SBR2076	o__norank_c__SBR2076	f__norank_c__SBR2076	g__norank_c__SBR2076	s__unclassified_g__norank_c__SBR2076	OTU1496	5	0	1	0	0	0	8	0	0	0	0	0	14
d__Bacteria	k__norank_d__Bacteria	p__Gemmatimonadetes	c__Gemmatimonadetes	o__Gemmatimonadales	f__Gemmatimonadaceae	g__unclassified_f__Gemmatimonadaceae	s__unclassified_f__Gemmatimonadaceae	OTU3202	0	1	1	9	6	10	1	0	0	3	2	3	36
d__Bacteria	k__norank_d__Bacteria	p__Bacteroidetes	c__Sphingobacteriia	o__Sphingobacteriales	f__Chitinophagaceae	g__Flavisolibacter	s__unclassified_g__Flavisolibacter	OTU1355	6	0	1	5	4	3	17	7	5	7	3	1	59
d__Bacteria	k__norank_d__Bacteria	p__unclassified_k__norank_d__Bacteria	c__unclassified_k__norank_d__Bacteria	o__unclassified_k__norank_d__Bacteria	f__unclassified_k__norank_d__Bacteria	g__unclassified_k__norank_d__Bacteria	s__unclassified_k__norank_d__Bacteria	OTU854	2	2	0	2	1	2	2	1	0	20	6	7	45
d__Bacteria	k__norank_d__Bacteria	p__Actinobacteria	c__Actinobacteria	o__Streptosporangiales	f__Thermomonosporaceae	g__Actinocorallia	s__unclassified_g__Actinocorallia	OTU2876	0	2	2	0	0	27	0	0	0	0	1	0	32
d__Bacteria	k__norank_d__Bacteria	p__Chloroflexi	c__Anaerolineae	o__Anaerolineales	f__Anaerolineaceae	g__norank_f__Anaerolineaceae	s__unclassified_g__norank_f__Anaerolineaceae	OTU473	4	4	0	2	2	0	10	2	2	0	0	0	26
d__Bacteria	k__norank_d__Bacteria	p__Proteobacteria	c__Alphaproteobacteria	o__Rhodospirillales	f__Rhodospirillales_Incertae_Sedis	g__Reyranella	s__unclassified_g__Reyranella	OTU2165	29	12	10	37	52	23	59	28	36	13	12	7	318
d__Bacteria	k__norank_d__Bacteria	p__Actinobacteria	c__Actinobacteria	o__unclassified_c__Actinobacteria	f__unclassified_c__Actinobacteria	g__unclassified_c__Actinobacteria	s__unclassified_c__Actinobacteria	OTU1771	2	0	0	7	1	2	12	9	10	2	2	1	48
d__Bacteria	k__norank_d__Bacteria	p__Actinobacteria	c__Actinobacteria	o__Acidimicrobiales	f__unclassified_o__Acidimicrobiales	g__unclassified_o__Acidimicrobiales	s__unclassified_o__Acidimicrobiales	OTU2462	0	0	1	0	0	0	9	3	3	0	0	0	16
d__Bacteria	k__norank_d__Bacteria	p__Chloroflexi	c__Chloroflexia	o__Kallotenuales	f__AKIW781	g__norank_f__AKIW781	s__uncultured_Chloroflexi_bacterium_g__norank_f__AKIW781	OTU365	7	7	0	3	7	4	2	0	3	1	1	0	35
d__Bacteria	k__norank_d__Bacteria	p__Chloroflexi	c__Ardenticatenia	o__Ardenticatenales	f__norank_o__Ardenticatenales	g__norank_o__Ardenticatenales	s__unclassified_g__norank_o__Ardenticatenales	OTU2282	0	0	0	0	0	0	6	0	0	0	0	0	6
d__Bacteria	k__norank_d__Bacteria	p__Actinobacteria	c__Actinobacteria	o__Euzebyales	f__Euzebyaceae	g__norank_f__Euzebyaceae	s__unclassified_g__norank_f__Euzebyaceae	OTU906	0	0	0	0	0	2	1	0	1	14	5	2	25
d__Bacteria	k__norank_d__Bacteria	p__Chloroflexi	c__Chloroflexia	o__Chloroflexales	f__Roseiflexaceae	g__Roseiflexus	s__uncultured_bacterium_g__Roseiflexus	OTU2253	124	72	32	89	132	43	114	128	70	5	0	2	811
d__Bacteria	k__norank_d__Bacteria	p__Bacteroidetes	c__Cytophagia	o__Cytophagales	f__Cytophagaceae	g__Pontibacter	s__unclassified_g__Pontibacter	OTU135	11	9	3	11	18	12	16	7	0	0	0	0	87
d__Bacteria	k__norank_d__Bacteria	p__Firmicutes	c__Clostridia	o__Clostridiales	f__Peptococcaceae	g__Desulfotomaculum	s__Desulfotomaculum_intricatum	OTU1305	1	0	0	0	0	2	1	3	0	0	0	0	7
d__Bacteria	k__norank_d__Bacteria	p__Bacteroidetes	c__Bacteroidia	o__Bacteroidales	f__Bacteroidaceae	g__Bacteroides	s__unclassified_g__Bacteroides	OTU388	8	4	0	6	2	1	0	0	0	0	0	0	21
d__Bacteria	k__norank_d__Bacteria	p__Chloroflexi	c__Ardenticatenia	o__Ardenticatenales	f__norank_o__Ardenticatenales	g__norank_o__Ardenticatenales	s__uncultured_bacterium_g__norank_o__Ardenticatenales	OTU2836	6	5	4	4	6	1	17	11	2	0	0	0	56
d__Bacteria	k__norank_d__Bacteria	p__Actinobacteria	c__Actinobacteria	o__Acidimicrobiales	f__unclassified_o__Acidimicrobiales	g__unclassified_o__Acidimicrobiales	s__unclassified_o__Acidimicrobiales	OTU3241	7	2	4	10	10	10	18	12	11	15	9	19	127
d__Bacteria	k__norank_d__Bacteria	p__Gemmatimonadetes	c__Gemmatimonadetes	o__Gemmatimonadales	f__Gemmatimonadaceae	g__norank_f__Gemmatimonadaceae	s__uncultured_Nitrospira_sp._g__norank	OTU1525	27	6	12	15	8	18	9	3	2	0	0	0	100
d__Bacteria	k__norank_d__Bacteria	p__Acidobacteria	c__Acidobacteria	o__Solibacterales	f__Solibacteraceae__Subgroup_3_	g__Bryobacter	s__uncultured_soil_bacterium_g__Bryobacter	OTU2031	2	5	4	5	4	2	4	2	0	2	0	2	32
d__Bacteria	k__norank_d__Bacteria	p__Gemmatimonadetes	c__Gemmatimonadetes	o__Gemmatimonadales	f__Gemmatimonadaceae	g__norank_f__Gemmatimonadaceae	s__uncultured_Gemmatimonadetes_bacterium_g__norank_f__Gemmatimonadaceae	OTU2107	2	2	0	3	0	0	13	9	0	0	0	0	29
d__Bacteria	k__norank_d__Bacteria	p__Proteobacteria	c__Alphaproteobacteria	o__Rhizobiales	f__Methylobacteriaceae	g__Microvirga	s__unclassified_g__Microvirga	OTU666	69	39	41	75	55	68	121	76	65	504	128	181	1422
d__Bacteria	k__norank_d__Bacteria	p__Acidobacteria	c__Acidobacteria	o__Solibacterales	f__Solibacteraceae__Subgroup_3_	g__Bryobacter	s__unclassified_g__Bryobacter	OTU361	0	7	1	3	2	6	6	1	0	2	0	0	28
d__Bacteria	k__norank_d__Bacteria	p__Planctomycetes	c__Planctomycetacia	o__Planctomycetales	f__Planctomycetaceae	g__norank_f__Planctomycetaceae	s__uncultured_Singulisphaera_sp._g__norank	OTU312	4	1	0	4	2	0	2	5	4	1	0	1	24
d__Bacteria	k__norank_d__Bacteria	p__Cyanobacteria	c__Cyanobacteria	o__SubsectionIII	f__FamilyI_o__SubsectionIII	g__Microcoleus	s__unclassified_g__Microcoleus	OTU2520	15	3	47	3	3	0	35	11	29	0	0	0	146
d__Bacteria	k__norank_d__Bacteria	p__Proteobacteria	c__Deltaproteobacteria	o__Myxococcales	f__Sandaracinaceae	g__norank_f__Sandaracinaceae	s__unclassified_g__norank_f__Sandaracinaceae	OTU1226	5	2	3	2	4	3	16	1	3	1	7	14	61
d__Bacteria	k__norank_d__Bacteria	p__Actinobacteria	c__Actinobacteria	o__Corynebacteriales	f__Nocardiaceae	g__Nocardia	s__Nocardia_uniformis	OTU308	3	0	0	0	1	0	0	0	1	0	0	0	5
d__Bacteria	k__norank_d__Bacteria	p__Proteobacteria	c__Deltaproteobacteria	o__Myxococcales	f__Haliangiaceae	g__Haliangium	s__uncultured_bacterium_g__Haliangium	OTU1460	2	1	0	3	6	9	3	3	1	4	0	0	32
d__Bacteria	k__norank_d__Bacteria	p__Proteobacteria	c__Alphaproteobacteria	o__Rhizobiales	f__Methylobacteriaceae	g__Microvirga	s__unclassified_g__Microvirga	OTU1255	74	34	63	87	71	102	145	137	84	355	123	241	1516
d__Bacteria	k__norank_d__Bacteria	p__Bacteroidetes	c__Sphingobacteriia	o__Sphingobacteriales	f__NS11-12_marine_group	g__norank_f__NS11-12_marine_group	s__uncultured_bacterium_g__norank_f__NS11-12_marine_group	OTU1720	0	0	1	0	2	1	3	0	0	0	0	0	7
d__Bacteria	k__norank_d__Bacteria	p__Actinobacteria	c__Actinobacteria	o__Micromonosporales	f__Micromonosporaceae	g__norank_f__Micromonosporaceae	s__uncultured_soil_bacterium_g__norank_f__Micromonosporaceae	OTU167	2	2	0	3	0	1	0	0	0	0	3	0	11
d__Bacteria	k__norank_d__Bacteria	p__Gemmatimonadetes	c__Gemmatimonadetes	o__Gemmatimonadales	f__Gemmatimonadaceae	g__unclassified_f__Gemmatimonadaceae	s__unclassified_f__Gemmatimonadaceae	OTU2532	3	0	4	0	0	0	26	4	9	0	0	0	46
d__Bacteria	k__norank_d__Bacteria	p__Deinococcus-Thermus	c__Deinococci	o__Deinococcales	f__Trueperaceae	g__Truepera	s__unclassified_g__Truepera	OTU264	2	0	1	1	4	0	0	3	0	0	0	0	11
d__Bacteria	k__norank_d__Bacteria	p__Actinobacteria	c__Actinobacteria	o__Gaiellales	f__Gaiellaceae	g__Gaiella	s__unclassified_g__Gaiella	OTU2175	92	38	54	44	58	46	200	69	100	21	8	4	734
d__Bacteria	k__norank_d__Bacteria	p__Actinobacteria	c__Actinobacteria	o__Streptomycetales	f__Streptomycetaceae	g__Streptomyces	s__unclassified_g__Streptomyces	OTU2238	58	47	43	224	157	145	180	113	103	320	442	211	2043
d__Bacteria	k__norank_d__Bacteria	p__Chloroflexi	c__Anaerolineae	o__Anaerolineales	f__Anaerolineaceae	g__norank_f__Anaerolineaceae	s__Chloroflexi_bacterium_OLB13	OTU2853	49	158	25	32	288	9	49	21	6	4	1	0	642
d__Bacteria	k__norank_d__Bacteria	p__Armatimonadetes	c__Chthonomonadetes	o__Chthonomonadales	f__norank_o__Chthonomonadales	g__norank_o__Chthonomonadales	s__uncultured_bacterium_g__norank_o__Chthonomonadales	OTU292	3	1	3	0	0	0	4	5	0	0	0	0	16
d__Bacteria	k__norank_d__Bacteria	p__Chloroflexi	c__KD4-96	o__norank_c__KD4-96	f__norank_c__KD4-96	g__norank_c__KD4-96	s__unclassified_g__norank_c__KD4-96	OTU1072	557	205	419	116	134	36	150	263	386	179	72	105	2622
d__Bacteria	k__norank_d__Bacteria	p__Actinobacteria	c__Actinobacteria	o__Streptosporangiales	f__Nocardiopsaceae	g__Murinocardiopsis	s__unclassified_g__Murinocardiopsis	OTU617	0	0	0	2	2	0	0	1	2	49	0	1	57
d__Bacteria	k__norank_d__Bacteria	p__Proteobacteria	c__Alphaproteobacteria	o__Rhodospirillales	f__I-10	g__norank_f__I-10	s__unclassified_g__norank_f__I-10	OTU1552	3	0	4	3	5	4	5	2	3	0	0	0	29
d__Bacteria	k__norank_d__Bacteria	p__Gemmatimonadetes	c__Gemmatimonadetes	o__Gemmatimonadales	f__Gemmatimonadaceae	g__Gemmatirosa	s__uncultured_bacterium_g__Gemmatirosa	OTU246	1	0	0	5	3	4	1	2	1	1	1	0	19
d__Bacteria	k__norank_d__Bacteria	p__Planctomycetes	c__Planctomycetacia	o__Planctomycetales	f__Planctomycetaceae	g__norank_f__Planctomycetaceae	s__unclassified_g__norank_f__Planctomycetaceae	OTU195	5	0	0	0	0	0	0	1	0	0	0	0	6
d__Bacteria	k__norank_d__Bacteria	p__Chloroflexi	c__Caldilineae	o__Caldilineales	f__Caldilineaceae	g__norank_f__Caldilineaceae	s__uncultured_bacterium_g__norank_f__Caldilineaceae	OTU953	4	13	1	2	10	6	0	0	1	0	0	0	37
d__Bacteria	k__norank_d__Bacteria	p__Planctomycetes	c__Planctomycetacia	o__Planctomycetales	f__Planctomycetaceae	g__norank_f__Planctomycetaceae	s__uncultured_bacterium_g__norank_f__Planctomycetaceae	OTU1572	0	1	1	2	0	0	3	2	0	0	0	0	9
d__Bacteria	k__norank_d__Bacteria	p__Actinobacteria	c__Actinobacteria	o__unclassified_c__Actinobacteria	f__unclassified_c__Actinobacteria	g__unclassified_c__Actinobacteria	s__unclassified_c__Actinobacteria	OTU1399	6	2	2	11	16	5	5	1	3	3	2	0	56
d__Bacteria	k__norank_d__Bacteria	p__Gemmatimonadetes	c__Gemmatimonadetes	o__Gemmatimonadales	f__Gemmatimonadaceae	g__Gemmatimonas	s__uncultured_bacterium_g__Gemmatimonas	OTU2525	2	0	0	0	0	0	5	1	0	0	0	0	8
d__Bacteria	k__norank_d__Bacteria	p__Bacteroidetes	c__Bacteroidetes_Incertae_Sedis	o__Order_II	f__Rhodothermaceae	g__norank_f__Rhodothermaceae	s__unclassified_g__norank_f__Rhodothermaceae	OTU3083	0	0	0	2	0	1	0	0	0	1	1	1	6
d__Bacteria	k__norank_d__Bacteria	p__Proteobacteria	c__Alphaproteobacteria	o__Sphingomonadales	f__Sphingomonadaceae	g__Sphingomonas	s__unclassified_g__Sphingomonas	OTU2856	109	83	87	110	131	146	195	138	79	42	13	26	1159
d__Bacteria	k__norank_d__Bacteria	p__Proteobacteria	c__Alphaproteobacteria	o__Rhodospirillales	f__Acetobacteraceae	g__Craurococcus	s__unclassified_g__Craurococcus	OTU2448	1	0	0	1	0	1	4	0	2	1	0	1	11
d__Bacteria	k__norank_d__Bacteria	p__Chloroflexi	c__Chloroflexia	o__Chloroflexales	f__Roseiflexaceae	g__Roseiflexus	s__uncultured_bacterium_g__Roseiflexus	OTU2925	0	1	0	0	5	2	1	0	0	0	0	0	9
d__Bacteria	k__norank_d__Bacteria	p__Firmicutes	c__Bacilli	o__Bacillales	f__Bacillaceae	g__unclassified_f__Bacillaceae	s__unclassified_f__Bacillaceae	OTU1907	4	8	2	5	8	8	16	7	2	0	0	0	60
d__Bacteria	k__norank_d__Bacteria	p__Fibrobacteres	c__Fibrobacteria	o__Fibrobacterales	f__Fibrobacteraceae	g__possible_genus_04	s__uncultured_bacterium_g__possible_genus_04	OTU1899	3	1	1	2	9	0	16	3	4	0	3	1	43
d__Bacteria	k__norank_d__Bacteria	p__Chloroflexi	c__Chloroflexia	o__Kallotenuales	f__unclassified_o__Kallotenuales	g__unclassified_o__Kallotenuales	s__unclassified_o__Kallotenuales	OTU3054	1	0	0	2	5	0	1	1	1	1	1	0	13
d__Bacteria	k__norank_d__Bacteria	p__Cyanobacteria	c__Cyanobacteria	o__SubsectionIII	f__FamilyI_o__SubsectionIII	g__unclassified_f__FamilyI_o__SubsectionIII	s__unclassified_f__FamilyI_o__SubsectionIII	OTU26	0	0	4	0	0	0	0	0	0	0	0	0	4
d__Bacteria	k__norank_d__Bacteria	p__Actinobacteria	c__Actinobacteria	o__Pseudonocardiales	f__Pseudonocardiaceae	g__Actinophytocola	s__unclassified_g__Actinophytocola	OTU674	2	0	4	15	1	12	8	4	2	84	17	28	177
d__Bacteria	k__norank_d__Bacteria	p__Proteobacteria	c__Alphaproteobacteria	o__Rhizobiales	f__Hyphomicrobiaceae	g__Pedomicrobium	s__uncultured_Pedomicrobium_sp.	OTU2422	44	19	13	33	16	23	33	33	20	28	14	13	289
d__Bacteria	k__norank_d__Bacteria	p__Chloroflexi	c__Ktedonobacteria	o__C0119	f__norank_o__C0119	g__norank_o__C0119	s__uncultured_soil_bacterium_g__norank_o__C0119	OTU513	0	0	0	0	0	0	0	0	0	61	1	1	63
d__Bacteria	k__norank_d__Bacteria	p__Acidobacteria	c__Acidobacteria	o__norank_c__Acidobacteria	f__norank_c__Acidobacteria	g__norank_c__Acidobacteria	s__Acidobacteria_bacterium_IGE-010	OTU908	1	0	1	0	0	0	0	0	0	22	10	7	41
d__Bacteria	k__norank_d__Bacteria	p__Firmicutes	c__Bacilli	o__Bacillales	f__Paenibacillaceae	g__Paenibacillus	s__unclassified_g__Paenibacillus	OTU684	0	2	0	3	2	13	0	0	0	61	15	34	130
d__Bacteria	k__norank_d__Bacteria	p__Planctomycetes	c__Planctomycetacia	o__Planctomycetales	f__Planctomycetaceae	g__norank_f__Planctomycetaceae	s__unclassified_g__norank_f__Planctomycetaceae	OTU3229	16	13	22	36	10	1	8	11	10	6	0	1	134
d__Bacteria	k__norank_d__Bacteria	p__Acidobacteria	c__Acidobacteria	o__Subgroup_10	f__ABS-19	g__norank_f__ABS-19	s__unclassified_g__norank_f__ABS-19	OTU2236	59	52	78	135	68	85	142	44	21	24	18	11	737
d__Bacteria	k__norank_d__Bacteria	p__Actinobacteria	c__Actinobacteria	o__Streptomycetales	f__Streptomycetaceae	g__Streptomyces	s__unclassified_g__Streptomyces	OTU733	135	74	81	250	312	278	294	162	149	728	343	387	3193
d__Bacteria	k__norank_d__Bacteria	p__Tectomicrobia	c__norank_p__Tectomicrobia	o__norank_p__Tectomicrobia	f__norank_p__Tectomicrobia	g__norank_p__Tectomicrobia	s__uncultured_bacterium_g__norank_p__Tectomicrobia	OTU1808	3	2	0	3	1	0	12	6	3	0	0	0	30
d__Bacteria	k__norank_d__Bacteria	p__Chloroflexi	c__Anaerolineae	o__Anaerolineales	f__Anaerolineaceae	g__norank_f__Anaerolineaceae	s__unclassified_g__norank_f__Anaerolineaceae	OTU2182	116	74	33	146	69	7	262	111	58	3	4	1	884
d__Bacteria	k__norank_d__Bacteria	p__Chloroflexi	c__Anaerolineae	o__Anaerolineales	f__Anaerolineaceae	g__norank_f__Anaerolineaceae	s__unclassified_g__norank_f__Anaerolineaceae	OTU2180	5	23	5	8	5	0	29	24	21	0	0	0	120
d__Bacteria	k__norank_d__Bacteria	p__Actinobacteria	c__Actinobacteria	o__Gaiellales	f__unclassified_o__Gaiellales	g__unclassified_o__Gaiellales	s__unclassified_o__Gaiellales	OTU2658	4	4	1	16	6	5	18	15	50	6	0	1	126
d__Bacteria	k__norank_d__Bacteria	p__Chloroflexi	c__Anaerolineae	o__Anaerolineales	f__Anaerolineaceae	g__norank_f__Anaerolineaceae	s__unclassified_g__norank_f__Anaerolineaceae	OTU2186	1	2	1	2	3	4	3	3	1	0	0	0	20
d__Bacteria	k__norank_d__Bacteria	p__Chloroflexi	c__Anaerolineae	o__Anaerolineales	f__Anaerolineaceae	g__norank_f__Anaerolineaceae	s__unclassified_g__norank_f__Anaerolineaceae	OTU2185	16	13	2	7	22	0	56	11	28	0	0	0	155
d__Bacteria	k__norank_d__Bacteria	p__Chloroflexi	c__Thermomicrobia	o__AKYG1722	f__norank_o__AKYG1722	g__norank_o__AKYG1722	s__uncultured_bacterium_g__norank_o__AKYG1722	OTU480	0	4	0	2	2	9	0	0	0	0	0	0	17
d__Bacteria	k__norank_d__Bacteria	p__Verrucomicrobia	c__OPB35_soil_group	o__norank_c__OPB35_soil_group	f__norank_c__OPB35_soil_group	g__norank_c__OPB35_soil_group	s__unclassified_g__norank_c__OPB35_soil_group	OTU2145	4	1	2	12	8	0	7	0	0	0	0	0	34
d__Bacteria	k__norank_d__Bacteria	p__Planctomycetes	c__Planctomycetacia	o__Planctomycetales	f__Planctomycetaceae	g__Gemmata	s__uncultured_bacterium_g__Gemmata	OTU1004	7	4	3	14	8	0	11	17	7	0	0	0	71
d__Bacteria	k__norank_d__Bacteria	p__Proteobacteria	c__Alphaproteobacteria	o__Rickettsiales	f__Mitochondria	g__norank_f__Mitochondria	s__unclassified_g__norank_f__Mitochondria	OTU1817	1	0	0	0	0	0	21	0	0	0	0	0	22
d__Bacteria	k__norank_d__Bacteria	p__Firmicutes	c__Bacilli	o__Bacillales	f__Paenibacillaceae	g__Paenibacillus	s__unclassified_g__Paenibacillus	OTU352	2	2	2	1	2	0	4	0	0	3	3	0	19
d__Bacteria	k__norank_d__Bacteria	p__Chloroflexi	c__Chloroflexia	o__Kallotenuales	f__AKIW781	g__norank_f__AKIW781	s__unclassified_g__norank_f__AKIW781	OTU2731	5	4	6	4	11	10	16	0	4	1	0	0	61
d__Bacteria	k__norank_d__Bacteria	p__Proteobacteria	c__Deltaproteobacteria	o__Myxococcales	f__BIrii41	g__norank_f__BIrii41	s__unclassified_g__norank_f__BIrii41	OTU2796	0	0	0	0	0	0	3	1	0	0	0	0	4
d__Bacteria	k__norank_d__Bacteria	p__Bacteroidetes	c__Sphingobacteriia	o__Sphingobacteriales	f__Chitinophagaceae	g__Flavisolibacter	s__unclassified_g__Flavisolibacter	OTU1597	0	2	6	2	0	2	6	1	1	8	1	0	29
d__Bacteria	k__norank_d__Bacteria	p__Chloroflexi	c__Anaerolineae	o__Anaerolineales	f__Anaerolineaceae	g__norank_f__Anaerolineaceae	s__unclassified_g__norank_f__Anaerolineaceae	OTU313	5	3	0	6	2	0	0	0	0	1	0	0	17
d__Bacteria	k__norank_d__Bacteria	p__Proteobacteria	c__Deltaproteobacteria	o__Myxococcales	f__Blfdi19	g__norank_f__Blfdi19	s__uncultured_bacterium_g__norank_f__Blfdi19	OTU2104	0	1	0	1	3	1	4	0	0	1	1	0	12
d__Bacteria	k__norank_d__Bacteria	p__Actinobacteria	c__Actinobacteria	o__Propionibacteriales	f__Nocardioidaceae	g__Flindersiella	s__uncultured_bacterium_g__Flindersiella	OTU790	0	0	0	0	0	0	0	0	0	12	1	10	23
d__Bacteria	k__norank_d__Bacteria	p__Actinobacteria	c__Actinobacteria	o__Propionibacteriales	f__Nocardioidaceae	g__Nocardioides	s__unclassified_g__Nocardioides	OTU2215	14	5	12	15	14	18	58	26	33	4	1	2	202
d__Bacteria	k__norank_d__Bacteria	p__WS2	c__norank_p__WS2	o__norank_p__WS2	f__norank_p__WS2	g__norank_p__WS2	s__uncultured_soil_bacterium_g__norank_p__WS2	OTU1471	2	0	0	0	2	0	6	3	1	1	0	1	16
d__Bacteria	k__norank_d__Bacteria	p__Proteobacteria	c__Alphaproteobacteria	o__Rhodobacterales	f__Rhodobacteraceae	g__Paracoccus	s__unclassified_g__Paracoccus	OTU919	1	0	1	1	1	2	2	3	0	8	4	8	31
d__Bacteria	k__norank_d__Bacteria	p__Acidobacteria	c__Acidobacteria	o__Solibacterales	f__Solibacteraceae__Subgroup_3_	g__Bryobacter	s__unclassified_g__Bryobacter	OTU1585	0	0	0	0	0	0	1	1	0	0	0	0	2
d__Bacteria	k__norank_d__Bacteria	p__Proteobacteria	c__Alphaproteobacteria	o__Rhodospirillales	f__Acetobacteraceae	g__norank_f__Acetobacteraceae	s__uncultured_Paracraurococcus_sp.	OTU2427	6	8	4	9	9	8	35	17	12	18	6	7	139
d__Bacteria	k__norank_d__Bacteria	p__Planctomycetes	c__Planctomycetacia	o__Planctomycetales	f__Planctomycetaceae	g__Gemmata	s__unclassified_g__Gemmata	OTU872	1	1	0	2	0	0	0	0	0	2	1	0	7
d__Bacteria	k__norank_d__Bacteria	p__Gemmatimonadetes	c__Gemmatimonadetes	o__Gemmatimonadales	f__Gemmatimonadaceae	g__unclassified_f__Gemmatimonadaceae	s__unclassified_f__Gemmatimonadaceae	OTU2897	4	4	0	29	15	54	3	4	0	10	2	5	130
d__Bacteria	k__norank_d__Bacteria	p__Bacteroidetes	c__Sphingobacteriia	o__Sphingobacteriales	f__Chitinophagaceae	g__norank_f__Chitinophagaceae	s__uncultured_Niastella_sp._g__norank	OTU2681	55	18	23	21	38	11	171	38	41	24	7	9	456
d__Bacteria	k__norank_d__Bacteria	p__Proteobacteria	c__Gammaproteobacteria	o__Legionellales	f__Coxiellaceae	g__Aquicella	s__unclassified_g__Aquicella	OTU2029	2	0	0	1	2	1	5	0	0	0	0	0	11
d__Bacteria	k__norank_d__Bacteria	p__Actinobacteria	c__Actinobacteria	o__Solirubrobacterales	f__unclassified_o__Solirubrobacterales	g__unclassified_o__Solirubrobacterales	s__unclassified_o__Solirubrobacterales	OTU2605	9	5	15	16	11	7	42	22	17	2	2	2	150
d__Bacteria	k__norank_d__Bacteria	p__Proteobacteria	c__Alphaproteobacteria	o__Rhizobiales	f__unclassified_o__Rhizobiales	g__unclassified_o__Rhizobiales	s__unclassified_o__Rhizobiales	OTU519	0	0	0	0	1	3	0	0	0	12	3	3	22
d__Bacteria	k__norank_d__Bacteria	p__Elusimicrobia	c__Elusimicrobia	o__Lineage_IIa	f__norank_o__Lineage_IIa	g__norank_o__Lineage_IIa	s__uncultured_bacterium_g__norank_o__Lineage_IIa	OTU2081	6	1	3	2	1	0	8	0	0	0	0	0	21
d__Bacteria	k__norank_d__Bacteria	p__Proteobacteria	c__Gammaproteobacteria	o__unclassified_c__Gammaproteobacteria	f__unclassified_c__Gammaproteobacteria	g__unclassified_c__Gammaproteobacteria	s__unclassified_c__Gammaproteobacteria	OTU507	1	10	1	0	0	1	0	0	0	0	0	0	13
d__Bacteria	k__norank_d__Bacteria	p__Acidobacteria	c__Acidobacteria	o__norank_c__Acidobacteria	f__norank_c__Acidobacteria	g__norank_c__Acidobacteria	s__unclassified_g__norank_c__Acidobacteria	OTU3048	32	26	11	118	26	0	24	26	12	2	0	0	277
d__Bacteria	k__norank_d__Bacteria	p__Proteobacteria	c__Deltaproteobacteria	o__Myxococcales	f__KD3-10	g__norank_f__KD3-10	s__uncultured_bacterium_g__norank_f__KD3-10	OTU1052	0	0	0	0	1	0	0	1	1	0	0	0	3
d__Bacteria	k__norank_d__Bacteria	p__Planctomycetes	c__Planctomycetacia	o__Planctomycetales	f__Planctomycetaceae	g__norank_f__Planctomycetaceae	s__uncultured_bacterium_g__norank_f__Planctomycetaceae	OTU959	0	0	1	0	0	0	1	0	1	0	0	0	3
d__Bacteria	k__norank_d__Bacteria	p__Planctomycetes	c__Planctomycetacia	o__Planctomycetales	f__Planctomycetaceae	g__Pir4_lineage	s__uncultured_bacterium_g__Pir4_lineage	OTU532	4	2	3	2	1	0	0	4	0	9	1	2	28
d__Bacteria	k__norank_d__Bacteria	p__Verrucomicrobia	c__OPB35_soil_group	o__norank_c__OPB35_soil_group	f__norank_c__OPB35_soil_group	g__norank_c__OPB35_soil_group	s__unclassified_g__norank_c__OPB35_soil_group	OTU2493	9	5	9	4	7	0	47	8	8	0	1	1	99
d__Bacteria	k__norank_d__Bacteria	p__Chloroflexi	c__Chloroflexia	o__Kallotenuales	f__AKIW781	g__norank_f__AKIW781	s__uncultured_endolithic_bacterium_g__norank_f__AKIW781	OTU935	1	2	0	1	4	0	1	4	1	10	3	6	33
d__Bacteria	k__norank_d__Bacteria	p__Firmicutes	c__Bacilli	o__Bacillales	f__Thermoactinomycetaceae	g__norank_f__Thermoactinomycetaceae	s__uncultured_bacterium_g__norank_f__Thermoactinomycetaceae	OTU1178	0	1	0	1	0	1	0	0	1	0	0	0	4
d__Bacteria	k__norank_d__Bacteria	p__Proteobacteria	c__Deltaproteobacteria	o__Myxococcales	f__Archangiaceae	g__Anaeromyxobacter	s__uncultured_bacterium_g__Anaeromyxobacter	OTU271	1	0	0	1	0	1	1	0	0	2	0	2	8
d__Bacteria	k__norank_d__Bacteria	p__Planctomycetes	c__Phycisphaerae	o__Tepidisphaerales	f__Tepidisphaeraceae	g__norank_f__Tepidisphaeraceae	s__unclassified_g__norank_f__Tepidisphaeraceae	OTU3226	1	2	1	11	2	0	2	0	1	0	0	0	20
d__Bacteria	k__norank_d__Bacteria	p__Proteobacteria	c__Deltaproteobacteria	o__Myxococcales	f__Sandaracinaceae	g__unclassified_f__Sandaracinaceae	s__unclassified_f__Sandaracinaceae	OTU2097	2	2	6	2	1	3	4	3	2	0	2	1	28
d__Bacteria	k__norank_d__Bacteria	p__Actinobacteria	c__Actinobacteria	o__Acidimicrobiales	f__unclassified_o__Acidimicrobiales	g__unclassified_o__Acidimicrobiales	s__unclassified_o__Acidimicrobiales	OTU359	3	1	3	7	7	9	7	4	4	5	2	5	57
d__Bacteria	k__norank_d__Bacteria	p__Actinobacteria	c__Actinobacteria	o__Acidimicrobiales	f__Iamiaceae	g__Iamia	s__Iamia_majanohamensis	OTU646	3	0	0	1	4	0	1	1	2	8	0	6	26
d__Bacteria	k__norank_d__Bacteria	p__Actinobacteria	c__Actinobacteria	o__Acidimicrobiales	f__unclassified_o__Acidimicrobiales	g__unclassified_o__Acidimicrobiales	s__unclassified_o__Acidimicrobiales	OTU354	5	7	6	24	14	14	11	6	11	1	0	0	99
d__Bacteria	k__norank_d__Bacteria	p__Actinobacteria	c__Actinobacteria	o__Pseudonocardiales	f__Pseudonocardiaceae	g__unclassified_f__Pseudonocardiaceae	s__unclassified_f__Pseudonocardiaceae	OTU1634	20	6	2	19	8	20	21	4	9	13	11	5	138
d__Bacteria	k__norank_d__Bacteria	p__Proteobacteria	c__Gammaproteobacteria	o__Legionellales	f__Coxiellaceae	g__Aquicella	s__unclassified_g__Aquicella	OTU2048	2	0	0	0	0	0	2	0	1	0	0	0	5
d__Bacteria	k__norank_d__Bacteria	p__Acidobacteria	c__Acidobacteria	o__Subgroup_7	f__norank_o__Subgroup_7	g__norank_o__Subgroup_7	s__unclassified_g__norank_o__Subgroup_7	OTU1604	12	2	8	1	2	1	39	9	7	0	0	0	81
d__Bacteria	k__norank_d__Bacteria	p__Proteobacteria	c__Deltaproteobacteria	o__Oligoflexales	f__0319-6G20	g__norank_f__0319-6G20	s__unclassified_g__norank_f__0319-6G20	OTU2949	0	1	0	0	0	3	0	1	1	2	0	0	8
d__Bacteria	k__norank_d__Bacteria	p__Acidobacteria	c__Acidobacteria	o__Solibacterales	f__Solibacteraceae__Subgroup_3_	g__Bryobacter	s__unclassified_g__Bryobacter	OTU1763	7	4	3	3	6	5	29	9	2	3	1	3	75
d__Bacteria	k__norank_d__Bacteria	p__Cyanobacteria	c__Cyanobacteria	o__SubsectionIII	f__FamilyI_o__SubsectionIII	g__unclassified_f__FamilyI_o__SubsectionIII	s__unclassified_f__FamilyI_o__SubsectionIII	OTU1675	3	0	9	0	0	0	12	2	10	0	0	0	36
d__Bacteria	k__norank_d__Bacteria	p__Chloroflexi	c__Chloroflexia	o__Kallotenuales	f__AKIW781	g__norank_f__AKIW781	s__unclassified_g__norank_f__AKIW781	OTU2478	7	4	2	9	11	13	16	26	18	1	0	0	107
d__Bacteria	k__norank_d__Bacteria	p__Planctomycetes	c__Phycisphaerae	o__unclassified_c__Phycisphaerae	f__unclassified_c__Phycisphaerae	g__unclassified_c__Phycisphaerae	s__unclassified_c__Phycisphaerae	OTU2886	0	0	0	3	2	3	0	0	0	1	0	1	10
d__Bacteria	k__norank_d__Bacteria	p__unclassified_k__norank_d__Bacteria	c__unclassified_k__norank_d__Bacteria	o__unclassified_k__norank_d__Bacteria	f__unclassified_k__norank_d__Bacteria	g__unclassified_k__norank_d__Bacteria	s__unclassified_k__norank_d__Bacteria	OTU2194	0	0	0	1	1	0	1	1	0	0	0	0	4
d__Bacteria	k__norank_d__Bacteria	p__Actinobacteria	c__Actinobacteria	o__Propionibacteriales	f__Nocardioidaceae	g__Nocardioides	s__Nocardioides_albus	OTU1833	3	1	2	10	3	11	5	5	3	45	24	21	133
d__Bacteria	k__norank_d__Bacteria	p__Chlorobi	c__Chlorobia	o__Chlorobiales	f__OPB56	g__norank_f__OPB56	s__unclassified_g__norank_f__OPB56	OTU571	1	4	0	0	3	0	2	1	0	3	1	0	15
d__Bacteria	k__norank_d__Bacteria	p__Actinobacteria	c__Actinobacteria	o__Acidimicrobiales	f__norank_o__Acidimicrobiales	g__norank_o__Acidimicrobiales	s__unclassified_g__norank_o__Acidimicrobiales	OTU1701	9	14	10	18	27	22	25	19	15	6	6	5	176
d__Bacteria	k__norank_d__Bacteria	p__Planctomycetes	c__Planctomycetacia	o__Planctomycetales	f__Planctomycetaceae	g__norank_f__Planctomycetaceae	s__uncultured_bacterium_g__norank_f__Planctomycetaceae	OTU1347	0	0	1	1	1	0	0	1	1	0	0	0	5
d__Bacteria	k__norank_d__Bacteria	p__Proteobacteria	c__Alphaproteobacteria	o__Rhizobiales	f__JG34-KF-361	g__norank_f__JG34-KF-361	s__uncultured_Rhizobiales_bacterium_g__norank_f__JG34-KF-361	OTU800	0	0	0	0	0	0	0	0	0	10	6	6	22
d__Bacteria	k__norank_d__Bacteria	p__Gemmatimonadetes	c__Gemmatimonadetes	o__Gemmatimonadales	f__Gemmatimonadaceae	g__unclassified_f__Gemmatimonadaceae	s__unclassified_f__Gemmatimonadaceae	OTU2981	1	4	0	11	8	8	3	2	0	1	1	4	43
d__Bacteria	k__norank_d__Bacteria	p__Actinobacteria	c__Actinobacteria	o__norank_c__Actinobacteria	f__norank_c__Actinobacteria	g__norank_c__Actinobacteria	s__unclassified_g__norank_c__Actinobacteria	OTU2204	5	1	2	0	2	0	6	4	7	0	0	3	30
d__Bacteria	k__norank_d__Bacteria	p__Planctomycetes	c__Phycisphaerae	o__Phycisphaerales	f__Phycisphaeraceae	g__AKYG587	s__uncultured_bacterium_g__AKYG587	OTU1202	2	1	3	1	5	3	4	3	1	1	0	0	24
d__Bacteria	k__norank_d__Bacteria	p__Proteobacteria	c__Alphaproteobacteria	o__Rhodobacterales	f__Rhodobacteraceae	g__unclassified_f__Rhodobacteraceae	s__unclassified_f__Rhodobacteraceae	OTU682	0	0	0	2	0	3	1	0	0	5	3	4	18
d__Bacteria	k__norank_d__Bacteria	p__Proteobacteria	c__Deltaproteobacteria	o__Oligoflexales	f__Oligoflexaceae	g__Oligoflexus	s__uncultured_bacterium_g__Oligoflexus	OTU1007	3	2	1	2	14	0	0	2	1	0	0	1	26
d__Bacteria	k__norank_d__Bacteria	p__Proteobacteria	c__Deltaproteobacteria	o__Bdellovibrionales	f__Bdellovibrionaceae	g__OM27_clade	s__unclassified_g__OM27_clade	OTU1420	3	4	6	15	12	3	8	7	1	1	2	6	68
d__Bacteria	k__norank_d__Bacteria	p__Proteobacteria	c__Deltaproteobacteria	o__Myxococcales	f__Blfdi19	g__norank_f__Blfdi19	s__uncultured_bacterium_g__norank_f__Blfdi19	OTU3079	1	0	1	1	0	3	4	3	0	1	0	0	14
d__Bacteria	k__norank_d__Bacteria	p__Firmicutes	c__Bacilli	o__Bacillales	f__Planococcaceae	g__Sporosarcina	s__unclassified_g__Sporosarcina	OTU3154	37	37	23	304	348	436	33	10	15	4	24	21	1292
d__Bacteria	k__norank_d__Bacteria	p__Proteobacteria	c__Alphaproteobacteria	o__Caulobacterales	f__Caulobacteraceae	g__norank_f__Caulobacteraceae	s__unclassified_g__norank_f__Caulobacteraceae	OTU764	5	2	3	7	8	1	1	3	4	21	7	14	76
d__Bacteria	k__norank_d__Bacteria	p__Planctomycetes	c__OM190	o__norank_c__OM190	f__norank_c__OM190	g__norank_c__OM190	s__unclassified_g__norank_c__OM190	OTU211	9	1	1	0	0	0	0	0	1	0	0	0	12
d__Bacteria	k__norank_d__Bacteria	p__Cyanobacteria	c__Cyanobacteria	o__norank_c__Cyanobacteria	f__norank_c__Cyanobacteria	g__norank_c__Cyanobacteria	s__unclassified_g__norank_c__Cyanobacteria	OTU1919	3	0	1	0	0	0	1	0	0	0	0	0	5
d__Bacteria	k__norank_d__Bacteria	p__Proteobacteria	c__Alphaproteobacteria	o__Rhizobiales	f__unclassified_o__Rhizobiales	g__unclassified_o__Rhizobiales	s__unclassified_o__Rhizobiales	OTU2141	0	0	0	0	0	3	3	0	0	0	0	0	6
d__Bacteria	k__norank_d__Bacteria	p__Chloroflexi	c__Chloroflexia	o__Chloroflexales	f__Roseiflexaceae	g__Roseiflexus	s__unclassified_g__Roseiflexus	OTU1303	62	43	35	47	67	14	27	14	6	0	0	0	315
d__Bacteria	k__norank_d__Bacteria	p__Armatimonadetes	c__Fimbriimonadia	o__Fimbriimonadales	f__Fimbriimonadaceae	g__norank_f__Fimbriimonadaceae	s__uncultured_bacterium_g__norank_f__Fimbriimonadaceae	OTU1139	0	0	2	0	0	0	2	0	2	0	0	0	6
d__Bacteria	k__norank_d__Bacteria	p__Actinobacteria	c__Actinobacteria	o__Gaiellales	f__norank_o__Gaiellales	g__norank_o__Gaiellales	s__unclassified_g__norank_o__Gaiellales	OTU2171	38	15	20	22	23	40	101	32	58	2	0	0	351
d__Bacteria	k__norank_d__Bacteria	p__Proteobacteria	c__Betaproteobacteria	o__Burkholderiales	f__Comamonadaceae	g__Variovorax	s__unclassified_g__Variovorax	OTU39	12	16	21	30	14	22	11	3	1	30	25	14	199
d__Bacteria	k__norank_d__Bacteria	p__Actinobacteria	c__Actinobacteria	o__Pseudonocardiales	f__Pseudonocardiaceae	g__unclassified_f__Pseudonocardiaceae	s__unclassified_f__Pseudonocardiaceae	OTU1589	1	2	1	6	6	0	122	82	58	0	4	1	283
d__Bacteria	k__norank_d__Bacteria	p__Firmicutes	c__Bacilli	o__Bacillales	f__unclassified_o__Bacillales	g__unclassified_o__Bacillales	s__unclassified_o__Bacillales	OTU888	44	55	13	55	39	55	46	33	19	30	23	41	453
d__Bacteria	k__norank_d__Bacteria	p__Chloroflexi	c__Anaerolineae	o__Anaerolineales	f__Anaerolineaceae	g__norank_f__Anaerolineaceae	s__uncultured_Caldilineales_bacterium_g__norank_f__Anaerolineaceae	OTU2073	3	1	1	2	0	1	2	1	1	0	0	0	12
d__Bacteria	k__norank_d__Bacteria	p__Latescibacteria	c__norank_p__Latescibacteria	o__norank_p__Latescibacteria	f__norank_p__Latescibacteria	g__norank_p__Latescibacteria	s__unclassified_g__norank_p__Latescibacteria	OTU33	1	0	1	0	0	0	0	2	0	0	0	0	4
d__Bacteria	k__norank_d__Bacteria	p__Armatimonadetes	c__Fimbriimonadia	o__Fimbriimonadales	f__Fimbriimonadaceae	g__norank_f__Fimbriimonadaceae	s__uncultured_bacterium_g__norank_f__Fimbriimonadaceae	OTU1737	0	1	1	4	0	2	4	0	0	0	0	0	12
d__Bacteria	k__norank_d__Bacteria	p__Chloroflexi	c__Chloroflexia	o__Chloroflexales	f__Roseiflexaceae	g__Roseiflexus	s__uncultured_bacterium_g__Roseiflexus	OTU2550	17	12	2	15	29	12	35	35	15	0	0	0	172
d__Bacteria	k__norank_d__Bacteria	p__Proteobacteria	c__Alphaproteobacteria	o__Rhizobiales	f__unclassified_o__Rhizobiales	g__unclassified_o__Rhizobiales	s__unclassified_o__Rhizobiales	OTU2381	56	31	23	63	76	62	142	77	73	69	23	23	718
d__Bacteria	k__norank_d__Bacteria	p__Proteobacteria	c__Deltaproteobacteria	o__Oligoflexales	f__0319-6G20	g__norank_f__0319-6G20	s__uncultured_bacterium_g__norank_f__0319-6G20	OTU1767	1	0	0	4	0	0	2	2	0	0	0	0	9
d__Bacteria	k__norank_d__Bacteria	p__Planctomycetes	c__Planctomycetacia	o__Planctomycetales	f__Planctomycetaceae	g__norank_f__Planctomycetaceae	s__uncultured_bacterium_g__norank_f__Planctomycetaceae	OTU374	7	4	0	0	0	0	1	1	2	7	0	0	22
d__Bacteria	k__norank_d__Bacteria	p__Bacteroidetes	c__Sphingobacteriia	o__Sphingobacteriales	f__env.OPS_17	g__norank_f__env.OPS_17	s__uncultured_Bacteroidetes_bacterium_g__norank_f__env.OPS_17	OTU2642	4	7	1	7	34	2	38	8	5	0	0	0	106
d__Bacteria	k__norank_d__Bacteria	p__Proteobacteria	c__Gammaproteobacteria	o__Xanthomonadales	f__norank_o__Xanthomonadales	g__norank_o__Xanthomonadales	s__unclassified_g__norank_o__Xanthomonadales	OTU115	2	2	5	5	2	2	3	2	1	6	0	1	31
d__Bacteria	k__norank_d__Bacteria	p__Actinobacteria	c__Actinobacteria	o__Acidimicrobiales	f__norank_o__Acidimicrobiales	g__norank_o__Acidimicrobiales	s__unclassified_g__norank_o__Acidimicrobiales	OTU42	0	0	2	3	3	2	1	3	2	3	1	3	23
d__Bacteria	k__norank_d__Bacteria	p__Proteobacteria	c__Betaproteobacteria	o__Burkholderiales	f__Burkholderiaceae	g__Limnobacter	s__uncultured_bacterium_g__Limnobacter	OTU333	0	2	0	1	0	1	0	0	0	0	0	0	4
d__Bacteria	k__norank_d__Bacteria	p__Proteobacteria	c__Deltaproteobacteria	o__Myxococcales	f__P3OB-42	g__norank_f__P3OB-42	s__uncultured_bacterium_g__norank_f__P3OB-42	OTU145	2	0	0	9	4	1	5	6	3	0	0	0	30
d__Bacteria	k__norank_d__Bacteria	p__Proteobacteria	c__Deltaproteobacteria	o__Myxococcales	f__Nannocystaceae	g__Nannocystis	s__unclassified_g__Nannocystis	OTU199	3	0	0	1	2	1	3	2	2	0	0	0	14
d__Bacteria	k__norank_d__Bacteria	p__Planctomycetes	c__Planctomycetacia	o__Planctomycetales	f__Planctomycetaceae	g__Planctomyces	s__unclassified_g__Planctomyces	OTU1542	3	3	1	25	6	0	5	4	4	3	0	1	55
d__Bacteria	k__norank_d__Bacteria	p__Actinobacteria	c__Actinobacteria	o__Streptosporangiales	f__Thermomonosporaceae	g__Actinomadura	s__Actinomadura_cremea	OTU2490	11	3	5	43	10	37	16	4	12	41	7	5	194
d__Bacteria	k__norank_d__Bacteria	p__Verrucomicrobia	c__Verrucomicrobiae	o__Verrucomicrobiales	f__Verrucomicrobiaceae	g__Haloferula	s__unclassified_g__Haloferula	OTU470	2	3	5	3	2	1	1	0	2	0	4	1	24
d__Bacteria	k__norank_d__Bacteria	p__Chloroflexi	c__TK10	o__norank_c__TK10	f__norank_c__TK10	g__norank_c__TK10	s__unclassified_g__norank_c__TK10	OTU1084	2	1	0	2	3	0	1	2	3	0	0	0	14
d__Bacteria	k__norank_d__Bacteria	p__Actinobacteria	c__Actinobacteria	o__Solirubrobacterales	f__288-2	g__norank_f__288-2	s__uncultured_bacterium_g__norank_f__288-2	OTU1229	4	5	5	6	4	3	8	11	8	2	3	4	63
d__Bacteria	k__norank_d__Bacteria	p__Proteobacteria	c__Deltaproteobacteria	o__Desulfurellales	f__Desulfurellaceae	g__H16	s__uncultured_Dongia_sp._g__H16	OTU136	1	0	0	1	1	2	1	2	1	0	1	0	10
d__Bacteria	k__norank_d__Bacteria	p__Actinobacteria	c__Actinobacteria	o__Frankiales	f__Geodermatophilaceae	g__Blastococcus	s__Blastococcus_aggregatus	OTU1242	26	19	11	281	162	214	43	34	40	451	185	261	1727
d__Bacteria	k__norank_d__Bacteria	p__Actinobacteria	c__Actinobacteria	o__Gaiellales	f__norank_o__Gaiellales	g__norank_o__Gaiellales	s__unclassified_g__norank_o__Gaiellales	OTU95	2	2	2	2	5	0	2	2	4	0	0	0	21
d__Bacteria	k__norank_d__Bacteria	p__Chloroflexi	c__Chloroflexia	o__Kallotenuales	f__AKIW781	g__norank_f__AKIW781	s__unclassified_g__norank_f__AKIW781	OTU1425	0	2	0	0	0	1	1	5	1	0	0	0	10
d__Bacteria	k__norank_d__Bacteria	p__Proteobacteria	c__Deltaproteobacteria	o__Myxococcales	f__Polyangiaceae	g__unclassified_f__Polyangiaceae	s__unclassified_f__Polyangiaceae	OTU2513	1	2	2	9	10	7	14	3	4	1	0	1	54
d__Bacteria	k__norank_d__Bacteria	p__Cyanobacteria	c__Cyanobacteria	o__SubsectionIV	f__FamilyI_o__SubsectionIV	g__Nostoc	s__unclassified_g__Nostoc	OTU2005	1	3	0	0	0	0	10	0	2	0	0	0	16
d__Bacteria	k__norank_d__Bacteria	p__Proteobacteria	c__Alphaproteobacteria	o__Rhodospirillales	f__I-10	g__norank_f__I-10	s__uncultured_Stella_sp._g__norank	OTU697	6	8	0	11	8	7	4	10	6	7	1	6	74
d__Bacteria	k__norank_d__Bacteria	p__Gemmatimonadetes	c__Gemmatimonadetes	o__norank_c__Gemmatimonadetes	f__norank_c__Gemmatimonadetes	g__norank_c__Gemmatimonadetes	s__unclassified_g__norank_c__Gemmatimonadetes	OTU1320	3	3	5	6	12	4	9	3	2	2	1	0	50
d__Bacteria	k__norank_d__Bacteria	p__Gemmatimonadetes	c__Gemmatimonadetes	o__Longimicrobiales	f__Longimicrobiaceae	g__norank_f__Longimicrobiaceae	s__unclassified_g__norank_f__Longimicrobiaceae	OTU357	1	22	0	1	1	1	0	5	0	0	0	0	31
d__Bacteria	k__norank_d__Bacteria	p__Proteobacteria	c__Alphaproteobacteria	o__Rhodospirillales	f__DA111	g__norank_f__DA111	s__uncultured_Stella_sp._g__norank_f__DA111	OTU231	40	24	12	19	25	46	84	49	31	0	0	1	331
d__Bacteria	k__norank_d__Bacteria	p__Proteobacteria	c__Deltaproteobacteria	o__Myxococcales	f__unclassified_o__Myxococcales	g__unclassified_o__Myxococcales	s__unclassified_o__Myxococcales	OTU1852	3	4	1	6	10	5	15	2	1	0	1	0	48
d__Bacteria	k__norank_d__Bacteria	p__Chloroflexi	c__Thermomicrobia	o__AKYG1722	f__norank_o__AKYG1722	g__norank_o__AKYG1722	s__unclassified_g__norank_o__AKYG1722	OTU2116	5	4	2	2	4	3	2	1	2	0	1	0	26
d__Bacteria	k__norank_d__Bacteria	p__Actinobacteria	c__Actinobacteria	o__Micrococcales	f__Intrasporangiaceae	g__Janibacter	s__uncultured_organism_g__Janibacter	OTU2251	129	70	49	187	162	91	179	134	202	155	57	51	1466
d__Bacteria	k__norank_d__Bacteria	p__Actinobacteria	c__Actinobacteria	o__Acidimicrobiales	f__Iamiaceae	g__Iamia	s__unclassified_g__Iamia	OTU784	1	1	1	0	1	2	1	0	0	6	4	2	19
d__Bacteria	k__norank_d__Bacteria	p__Bacteroidetes	c__Cytophagia	o__Cytophagales	f__Cytophagaceae	g__Hymenobacter	s__unclassified_g__Hymenobacter	OTU1541	0	1	2	0	10	4	10	6	3	0	0	0	36
d__Bacteria	k__norank_d__Bacteria	p__Planctomycetes	c__OM190	o__norank_c__OM190	f__norank_c__OM190	g__norank_c__OM190	s__uncultured_bacterium_g__norank_c__OM190	OTU1672	11	6	6	4	5	0	13	6	8	0	1	1	61
d__Bacteria	k__norank_d__Bacteria	p__Bacteroidetes	c__Sphingobacteriia	o__Sphingobacteriales	f__Chitinophagaceae	g__Flavisolibacter	s__unclassified_g__Flavisolibacter	OTU2133	2	0	1	1	0	0	4	1	1	0	0	0	10
d__Bacteria	k__norank_d__Bacteria	p__Chloroflexi	c__Chloroflexia	o__Chloroflexales	f__FFCH7168	g__norank_f__FFCH7168	s__uncultured_bacterium_g__norank_f__FFCH7168	OTU2254	11	3	3	3	9	0	15	12	6	0	0	0	62
d__Bacteria	k__norank_d__Bacteria	p__Omnitrophica	c__norank_p__Omnitrophica	o__norank_p__Omnitrophica	f__norank_p__Omnitrophica	g__norank_p__Omnitrophica	s__uncultured_bacterium_g__norank_p__Omnitrophica	OTU2094	1	0	1	0	2	0	1	0	0	0	0	0	5
d__Bacteria	k__norank_d__Bacteria	p__Gemmatimonadetes	c__Gemmatimonadetes	o__norank_c__Gemmatimonadetes	f__norank_c__Gemmatimonadetes	g__norank_c__Gemmatimonadetes	s__uncultured_bacterium_g__norank_c__Gemmatimonadetes	OTU2976	1	4	0	1	2	2	0	0	0	4	2	5	21
d__Bacteria	k__norank_d__Bacteria	p__Actinobacteria	c__Actinobacteria	o__Acidimicrobiales	f__norank_o__Acidimicrobiales	g__norank_o__Acidimicrobiales	s__unclassified_g__norank_o__Acidimicrobiales	OTU655	3	0	0	1	1	0	0	1	2	7	2	3	20
d__Bacteria	k__norank_d__Bacteria	p__Planctomycetes	c__Phycisphaerae	o__Tepidisphaerales	f__Tepidisphaeraceae	g__norank_f__Tepidisphaeraceae	s__unclassified_g__norank_f__Tepidisphaeraceae	OTU2990	1	0	1	5	0	0	0	0	0	0	0	0	7
d__Bacteria	k__norank_d__Bacteria	p__Proteobacteria	c__Gammaproteobacteria	o__Xanthomonadales	f__Xanthomonadaceae	g__Pseudofulvimonas	s__uncultured_bacterium_g__Pseudofulvimonas	OTU696	0	0	0	0	0	0	0	0	0	2	3	14	19
d__Bacteria	k__norank_d__Bacteria	p__Chloroflexi	c__KD4-96	o__norank_c__KD4-96	f__norank_c__KD4-96	g__norank_c__KD4-96	s__uncultured_bacterium_g__norank_c__KD4-96	OTU787	6	2	0	0	0	0	0	1	0	8	1	2	20
d__Bacteria	k__norank_d__Bacteria	p__Proteobacteria	c__Betaproteobacteria	o__Burkholderiales	f__Comamonadaceae	g__unclassified_f__Comamonadaceae	s__unclassified_f__Comamonadaceae	OTU2714	134	133	114	143	193	181	238	117	92	190	117	69	1721
d__Bacteria	k__norank_d__Bacteria	p__Acidobacteria	c__Acidobacteria	o__Blastocatellales	f__Blastocatellaceae__Subgroup_4_	g__11-24	s__unclassified_g__11-24	OTU382	8	11	6	2	1	0	1	0	0	2	0	1	32
d__Bacteria	k__norank_d__Bacteria	p__Proteobacteria	c__Alphaproteobacteria	o__Rhodospirillales	f__Acetobacteraceae	g__unclassified_f__Acetobacteraceae	s__unclassified_f__Acetobacteraceae	OTU2112	0	0	0	0	0	0	1	0	0	9	1	4	15
d__Bacteria	k__norank_d__Bacteria	p__Actinobacteria	c__Actinobacteria	o__Acidimicrobiales	f__Acidimicrobiaceae	g__Ilumatobacter	s__unclassified_g__Ilumatobacter	OTU1677	64	45	62	68	57	54	112	53	50	12	14	11	602
d__Bacteria	k__norank_d__Bacteria	p__Proteobacteria	c__Alphaproteobacteria	o__Rhodospirillales	f__Acetobacteraceae	g__Roseomonas	s__Roseomonas_frigidaquae	OTU758	0	0	0	2	0	0	0	0	0	7	2	6	17
d__Bacteria	k__norank_d__Bacteria	p__Acidobacteria	c__Acidobacteria	o__Solibacterales	f__Solibacteraceae__Subgroup_3_	g__PAUC26f	s__unclassified_g__PAUC26f	OTU46	1	2	6	3	2	3	0	0	1	6	2	2	28
d__Bacteria	k__norank_d__Bacteria	p__Proteobacteria	c__Deltaproteobacteria	o__Myxococcales	f__BIrii41	g__norank_f__BIrii41	s__unclassified_g__norank_f__BIrii41	OTU1311	5	9	5	9	10	15	9	7	9	2	3	20	103
d__Bacteria	k__norank_d__Bacteria	p__Actinobacteria	c__Actinobacteria	o__norank_c__Actinobacteria	f__norank_c__Actinobacteria	g__norank_c__Actinobacteria	s__unclassified_g__norank_c__Actinobacteria	OTU1033	13	1	7	4	2	1	15	13	5	0	0	0	61
d__Bacteria	k__norank_d__Bacteria	p__Proteobacteria	c__Alphaproteobacteria	o__Rhizobiales	f__Rhizobiaceae	g__Ensifer	s__unclassified_g__Ensifer	OTU694	63	78	40	143	92	205	49	50	23	46	35	34	858
d__Bacteria	k__norank_d__Bacteria	p__Planctomycetes	c__Planctomycetacia	o__Planctomycetales	f__Planctomycetaceae	g__norank_f__Planctomycetaceae	s__unclassified_g__norank_f__Planctomycetaceae	OTU476	1	2	0	3	3	0	1	0	0	0	0	0	10
d__Bacteria	k__norank_d__Bacteria	p__Proteobacteria	c__Alphaproteobacteria	o__Rhizobiales	f__Hyphomicrobiaceae	g__Pedomicrobium	s__unclassified_g__Pedomicrobium	OTU1338	20	9	12	23	14	15	25	21	12	5	1	7	164
d__Bacteria	k__norank_d__Bacteria	p__Actinobacteria	c__Actinobacteria	o__Micrococcales	f__Promicromonosporaceae	g__Promicromonospora	s__unclassified_g__Promicromonospora	OTU2787	41	19	20	63	26	13	51	12	52	95	168	45	605
d__Bacteria	k__norank_d__Bacteria	p__Chloroflexi	c__Ardenticatenia	o__norank_c__Ardenticatenia	f__norank_c__Ardenticatenia	g__norank_c__Ardenticatenia	s__unclassified_g__norank_c__Ardenticatenia	OTU610	0	0	0	0	0	0	0	0	0	2	0	0	2
d__Bacteria	k__norank_d__Bacteria	p__Proteobacteria	c__Deltaproteobacteria	o__Bdellovibrionales	f__Bdellovibrionaceae	g__OM27_clade	s__uncultured_Myxococcales_bacterium_g__OM27_clade	OTU547	0	0	1	0	0	0	0	0	0	3	0	0	4
d__Bacteria	k__norank_d__Bacteria	p__Actinobacteria	c__Actinobacteria	o__Gaiellales	f__Gaiellaceae	g__Gaiella	s__unclassified_g__Gaiella	OTU2545	143	108	92	231	156	171	345	201	218	67	32	48	1812
d__Bacteria	k__norank_d__Bacteria	p__Actinobacteria	c__Actinobacteria	o__Solirubrobacterales	f__Elev-16S-1332	g__norank_f__Elev-16S-1332	s__unclassified_g__norank_f__Elev-16S-1332	OTU2686	13	13	11	26	27	10	28	6	13	1	0	1	149
d__Bacteria	k__norank_d__Bacteria	p__Chloroflexi	c__Thermomicrobia	o__JG30-KF-CM45	f__norank_o__JG30-KF-CM45	g__norank_o__JG30-KF-CM45	s__unclassified_g__norank_o__JG30-KF-CM45	OTU747	0	0	0	0	0	0	0	0	1	2	0	7	10
d__Bacteria	k__norank_d__Bacteria	p__Chloroflexi	c__Anaerolineae	o__Anaerolineales	f__Anaerolineaceae	g__norank_f__Anaerolineaceae	s__unclassified_g__norank_f__Anaerolineaceae	OTU1516	12	5	2	1	4	0	3	1	3	1	0	1	33
d__Bacteria	k__norank_d__Bacteria	p__Actinobacteria	c__Actinobacteria	o__norank_c__Actinobacteria	f__norank_c__Actinobacteria	g__norank_c__Actinobacteria	s__uncultured_bacterium_0425-2M17	OTU1358	3	0	2	0	0	0	0	5	1	0	0	0	11
d__Bacteria	k__norank_d__Bacteria	p__Planctomycetes	c__Planctomycetacia	o__Planctomycetales	f__Planctomycetaceae	g__unclassified_f__Planctomycetaceae	s__unclassified_f__Planctomycetaceae	OTU2080	1	1	1	2	1	0	1	0	0	0	0	0	7
d__Bacteria	k__norank_d__Bacteria	p__Actinobacteria	c__Actinobacteria	o__Solirubrobacterales	f__Elev-16S-1332	g__norank_f__Elev-16S-1332	s__unclassified_g__norank_f__Elev-16S-1332	OTU1645	6	3	5	18	12	13	23	13	5	16	5	5	124
d__Bacteria	k__norank_d__Bacteria	p__Proteobacteria	c__Gammaproteobacteria	o__Xanthomonadales	f__Solimonadaceae	g__Polycyclovorans	s__uncultured_Xanthomonadales_bacterium_g__Polycyclovorans	OTU2077	1	7	0	3	1	0	4	3	0	0	0	0	19
d__Bacteria	k__norank_d__Bacteria	p__Proteobacteria	c__Alphaproteobacteria	o__Rhizobiales	f__KF-JG30-B3	g__norank_f__KF-JG30-B3	s__uncultured_bacterium_g__norank_f__KF-JG30-B3	OTU2745	13	6	8	10	11	10	33	12	11	9	7	8	138
d__Bacteria	k__norank_d__Bacteria	p__Planctomycetes	c__Planctomycetacia	o__Planctomycetales	f__Planctomycetaceae	g__norank_f__Planctomycetaceae	s__unclassified_g__norank_f__Planctomycetaceae	OTU102	0	1	1	4	0	0	0	0	0	0	0	0	6
d__Bacteria	k__norank_d__Bacteria	p__Nitrospirae	c__Nitrospira	o__norank_c__Nitrospira	f__norank_c__Nitrospira	g__Nitrospira	s__unclassified_g__Nitrospira	OTU169	3	2	0	1	0	0	1	2	0	0	0	0	9
d__Bacteria	k__norank_d__Bacteria	p__Planctomycetes	c__Phycisphaerae	o__Tepidisphaerales	f__Tepidisphaeraceae	g__norank_f__Tepidisphaeraceae	s__unclassified_g__norank_f__Tepidisphaeraceae	OTU2977	0	0	0	2	0	0	0	0	0	0	0	0	2
d__Bacteria	k__norank_d__Bacteria	p__Firmicutes	c__Clostridia	o__Clostridiales	f__Lachnospiraceae	g__Anaerostipes	s__unclassified_g__Anaerostipes	OTU2957	0	1	0	0	1	2	0	0	0	0	0	0	4
d__Bacteria	k__norank_d__Bacteria	p__Planctomycetes	c__Planctomycetacia	o__Planctomycetales	f__Planctomycetaceae	g__unclassified_f__Planctomycetaceae	s__unclassified_f__Planctomycetaceae	OTU401	1	1	0	0	0	0	0	0	0	0	0	0	2
d__Bacteria	k__norank_d__Bacteria	p__Proteobacteria	c__Betaproteobacteria	o__Nitrosomonadales	f__Nitrosomonadaceae	g__norank_f__Nitrosomonadaceae	s__uncultured_Burkholderiaceae_bacterium_g__norank_f__Nitrosomonadaceae	OTU266	9	1	1	0	0	5	1	1	1	0	0	0	19
d__Bacteria	k__norank_d__Bacteria	p__Chloroflexi	c__P2-11E	o__norank_c__P2-11E	f__norank_c__P2-11E	g__norank_c__P2-11E	s__uncultured_bacterium_g__norank_c__P2-11E	OTU22	2	0	4	0	0	0	2	1	1	0	0	0	10
d__Bacteria	k__norank_d__Bacteria	p__Planctomycetes	c__Planctomycetacia	o__Planctomycetales	f__Planctomycetaceae	g__Pirellula	s__unclassified_g__Pirellula	OTU355	2	11	5	19	2	0	2	6	1	0	0	0	48
d__Bacteria	k__norank_d__Bacteria	p__Planctomycetes	c__Phycisphaerae	o__Phycisphaerales	f__Phycisphaeraceae	g__SM1A02	s__uncultured_planctomycete_g__SM1A02	OTU1662	3	0	1	2	3	0	8	3	1	0	0	0	21
d__Bacteria	k__norank_d__Bacteria	p__Chloroflexi	c__Ardenticatenia	o__unclassified_c__Ardenticatenia	f__unclassified_c__Ardenticatenia	g__unclassified_c__Ardenticatenia	s__unclassified_c__Ardenticatenia	OTU3115	23	3	5	5	31	4	74	48	15	0	0	0	208
d__Bacteria	k__norank_d__Bacteria	p__Proteobacteria	c__Gammaproteobacteria	o__Xanthomonadales	f__Xanthomonadaceae	g__Lysobacter	s__unclassified_g__Lysobacter	OTU1834	7	5	2	4	2	1	3	0	1	0	0	0	25
d__Bacteria	k__norank_d__Bacteria	p__Firmicutes	c__Bacilli	o__Bacillales	f__Paenibacillaceae	g__Paenibacillus	s__unclassified_g__Paenibacillus	OTU92	1	2	1	3	1	0	0	6	0	0	0	0	14
d__Bacteria	k__norank_d__Bacteria	p__Chloroflexi	c__Chloroflexia	o__Kallotenuales	f__AKIW781	g__norank_f__AKIW781	s__unclassified_g__norank_f__AKIW781	OTU1994	0	1	0	0	0	3	2	0	0	0	0	0	6
d__Bacteria	k__norank_d__Bacteria	p__Actinobacteria	c__Actinobacteria	o__Rubrobacterales	f__Rubrobacteriaceae	g__Rubrobacter	s__uncultured_Actinomycetales_bacterium_g__Rubrobacter	OTU2159	24	22	10	58	37	58	57	49	27	2	0	2	346
d__Bacteria	k__norank_d__Bacteria	p__Actinobacteria	c__Actinobacteria	o__Solirubrobacterales	f__Elev-16S-1332	g__norank_f__Elev-16S-1332	s__uncultured_Rubrobacteraceae_bacterium_g__norank_f__Elev-16S-1332	OTU1222	1	3	1	0	3	6	0	4	1	5	1	1	26
d__Bacteria	k__norank_d__Bacteria	p__Firmicutes	c__Clostridia	o__Clostridiales	f__Ruminococcaceae	g__Faecalibacterium	s__unclassified_g__Faecalibacterium	OTU242	10	3	0	3	6	9	3	0	0	0	0	0	34
d__Bacteria	k__norank_d__Bacteria	p__Actinobacteria	c__Actinobacteria	o__Acidimicrobiales	f__unclassified_o__Acidimicrobiales	g__unclassified_o__Acidimicrobiales	s__unclassified_o__Acidimicrobiales	OTU1109	10	7	1	15	7	8	25	18	14	15	5	5	130
d__Bacteria	k__norank_d__Bacteria	p__Proteobacteria	c__Deltaproteobacteria	o__Bdellovibrionales	f__Bacteriovoracaceae	g__Peredibacter	s__unclassified_g__Peredibacter	OTU1660	4	2	0	2	8	0	5	4	0	1	0	0	26
d__Bacteria	k__norank_d__Bacteria	p__Gemmatimonadetes	c__Gemmatimonadetes	o__Gemmatimonadales	f__Gemmatimonadaceae	g__Gemmatirosa	s__uncultured_bacterium_g__Gemmatirosa	OTU467	35	24	22	38	35	17	165	70	53	13	2	8	482
d__Bacteria	k__norank_d__Bacteria	p__Latescibacteria	c__norank_p__Latescibacteria	o__norank_p__Latescibacteria	f__norank_p__Latescibacteria	g__norank_p__Latescibacteria	s__uncultured_soil_bacterium_g__norank_p__Latescibacteria	OTU284	2	0	0	0	1	0	0	1	3	0	0	0	7
d__Bacteria	k__norank_d__Bacteria	p__Proteobacteria	c__Deltaproteobacteria	o__NB1-j	f__norank_o__NB1-j	g__norank_o__NB1-j	s__unclassified_g__norank_o__NB1-j	OTU52	0	1	1	4	2	1	3	1	2	3	0	0	18
d__Bacteria	k__norank_d__Bacteria	p__Proteobacteria	c__Alphaproteobacteria	o__Caulobacterales	f__Caulobacteraceae	g__norank_f__Caulobacteraceae	s__uncultured_Caulobacteraceae_bacterium_g__norank	OTU720	2	7	7	15	11	8	15	4	2	40	25	34	170
d__Bacteria	k__norank_d__Bacteria	p__Firmicutes	c__Bacilli	o__Bacillales	f__unclassified_o__Bacillales	g__unclassified_o__Bacillales	s__unclassified_o__Bacillales	OTU1329	0	0	0	2	2	1	0	2	0	0	0	0	7
d__Bacteria	k__norank_d__Bacteria	p__Proteobacteria	c__Deltaproteobacteria	o__Myxococcales	f__Nannocystaceae	g__Nannocystis	s__unclassified_g__Nannocystis	OTU1868	8	3	2	2	26	4	8	4	3	4	3	6	73
d__Bacteria	k__norank_d__Bacteria	p__Actinobacteria	c__Actinobacteria	o__Acidimicrobiales	f__norank_o__Acidimicrobiales	g__norank_o__Acidimicrobiales	s__unclassified_g__norank_o__Acidimicrobiales	OTU1699	1	4	5	3	4	4	14	3	4	1	0	0	43
d__Bacteria	k__norank_d__Bacteria	p__Chloroflexi	c__Anaerolineae	o__Anaerolineales	f__Anaerolineaceae	g__norank_f__Anaerolineaceae	s__uncultured_Chloroflexi_bacterium_g__norank_f__Anaerolineaceae	OTU2649	7	8	0	3	9	1	39	8	9	0	0	0	84
d__Bacteria	k__norank_d__Bacteria	p__Chloroflexi	c__unclassified_p__Chloroflexi	o__unclassified_p__Chloroflexi	f__unclassified_p__Chloroflexi	g__unclassified_p__Chloroflexi	s__unclassified_p__Chloroflexi	OTU783	0	2	0	1	3	6	1	5	2	6	2	5	33
d__Bacteria	k__norank_d__Bacteria	p__Chloroflexi	c__TK10	o__norank_c__TK10	f__norank_c__TK10	g__norank_c__TK10	s__unclassified_g__norank_c__TK10	OTU202	2	1	0	2	4	4	0	3	0	2	0	0	18
d__Bacteria	k__norank_d__Bacteria	p__Planctomycetes	c__Planctomycetacia	o__Planctomycetales	f__Planctomycetaceae	g__norank_f__Planctomycetaceae	s__uncultured_Pasteuria_sp._g__norank	OTU127	8	2	6	0	1	0	2	4	3	6	0	0	32
d__Bacteria	k__norank_d__Bacteria	p__Armatimonadetes	c__norank_p__Armatimonadetes	o__norank_p__Armatimonadetes	f__norank_p__Armatimonadetes	g__norank_p__Armatimonadetes	s__unclassified_g__norank_p__Armatimonadetes	OTU418	2	4	3	1	0	3	0	1	1	0	1	0	16
d__Bacteria	k__norank_d__Bacteria	p__Planctomycetes	c__Planctomycetacia	o__Planctomycetales	f__Planctomycetaceae	g__Pirellula	s__unclassified_g__Pirellula	OTU681	0	1	0	0	0	0	0	0	0	2	1	1	5
d__Bacteria	k__norank_d__Bacteria	p__Chloroflexi	c__unclassified_p__Chloroflexi	o__unclassified_p__Chloroflexi	f__unclassified_p__Chloroflexi	g__unclassified_p__Chloroflexi	s__unclassified_p__Chloroflexi	OTU380	0	4	0	0	4	1	0	0	0	0	0	0	9
d__Bacteria	k__norank_d__Bacteria	p__Acidobacteria	c__Acidobacteria	o__norank_c__Acidobacteria	f__norank_c__Acidobacteria	g__norank_c__Acidobacteria	s__uncultured_Geoalkalibacter_sp._g__norank_c__Acidobacteria	OTU1280	29	14	25	5	6	4	5	18	8	2	3	2	121
d__Bacteria	k__norank_d__Bacteria	p__Armatimonadetes	c__norank_p__Armatimonadetes	o__norank_p__Armatimonadetes	f__norank_p__Armatimonadetes	g__norank_p__Armatimonadetes	s__uncultured_bacterium_g__norank_p__Armatimonadetes	OTU38	2	5	3	1	2	7	5	1	4	0	0	1	31
d__Bacteria	k__norank_d__Bacteria	p__Proteobacteria	c__Gammaproteobacteria	o__Legionellales	f__Coxiellaceae	g__Coxiella	s__unclassified_g__Coxiella	OTU2891	1	0	0	1	0	2	0	0	1	0	0	0	5
d__Bacteria	k__norank_d__Bacteria	p__Actinobacteria	c__Actinobacteria	o__Acidimicrobiales	f__Iamiaceae	g__Iamia	s__uncultured_bacterium_g__Iamia	OTU3228	1	3	1	6	7	1	2	2	2	18	24	28	95
d__Bacteria	k__norank_d__Bacteria	p__Chloroflexi	c__Chloroflexia	o__Kallotenuales	f__AKIW781	g__norank_f__AKIW781	s__unclassified_g__norank_f__AKIW781	OTU651	0	0	0	2	1	2	0	1	2	4	1	0	13
d__Bacteria	k__norank_d__Bacteria	p__Proteobacteria	c__Alphaproteobacteria	o__Rhodospirillales	f__DA111	g__norank_f__DA111	s__unclassified_g__norank_f__DA111	OTU2889	18	3	16	22	21	19	28	7	5	8	3	10	160
d__Bacteria	k__norank_d__Bacteria	p__Chloroflexi	c__JG30-KF-CM66	o__norank_c__JG30-KF-CM66	f__norank_c__JG30-KF-CM66	g__norank_c__JG30-KF-CM66	s__uncultured_Chloroflexi_bacterium_g__norank_c__JG30-KF-CM66	OTU161	1	1	1	1	2	0	0	0	0	1	0	0	7
d__Bacteria	k__norank_d__Bacteria	p__Actinobacteria	c__Actinobacteria	o__Solirubrobacterales	f__Elev-16S-1332	g__norank_f__Elev-16S-1332	s__unclassified_g__norank_f__Elev-16S-1332	OTU1131	3	1	1	7	4	2	6	3	3	51	18	26	125
d__Bacteria	k__norank_d__Bacteria	p__Planctomycetes	c__Planctomycetacia	o__Planctomycetales	f__Planctomycetaceae	g__norank_f__Planctomycetaceae	s__planctomycete_WY69	OTU1158	1	1	0	1	1	0	0	1	3	0	0	0	8
d__Bacteria	k__norank_d__Bacteria	p__Chloroflexi	c__Thermomicrobia	o__JG30-KF-CM45	f__norank_o__JG30-KF-CM45	g__norank_o__JG30-KF-CM45	s__unclassified_g__norank_o__JG30-KF-CM45	OTU537	2	5	1	1	1	1	0	2	1	16	6	2	38
d__Bacteria	k__norank_d__Bacteria	p__Verrucomicrobia	c__OPB35_soil_group	o__norank_c__OPB35_soil_group	f__norank_c__OPB35_soil_group	g__norank_c__OPB35_soil_group	s__unclassified_g__norank_c__OPB35_soil_group	OTU73	4	0	1	0	0	0	1	0	0	0	0	0	6
d__Bacteria	k__norank_d__Bacteria	p__Proteobacteria	c__Gammaproteobacteria	o__Cellvibrionales	f__Cellvibrionaceae	g__Cellvibrio	s__unclassified_g__Cellvibrio	OTU892	0	0	0	0	0	0	1	0	1	7	6	2	17
d__Bacteria	k__norank_d__Bacteria	p__Actinobacteria	c__Actinobacteria	o__Acidimicrobiales	f__norank_o__Acidimicrobiales	g__norank_o__Acidimicrobiales	s__uncultured_Ferrimicrobium_sp._g__norank	OTU2887	4	4	0	11	6	1	1	5	2	6	14	9	63
d__Bacteria	k__norank_d__Bacteria	p__Gemmatimonadetes	c__Gemmatimonadetes	o__Gemmatimonadales	f__Gemmatimonadaceae	g__unclassified_f__Gemmatimonadaceae	s__unclassified_f__Gemmatimonadaceae	OTU1055	3	0	3	6	3	2	9	5	3	2	0	1	37
d__Bacteria	k__norank_d__Bacteria	p__Acidobacteria	c__Acidobacteria	o__Blastocatellales	f__Blastocatellaceae__Subgroup_4_	g__RB41	s__unclassified_g__RB41	OTU900	21	6	8	3	4	2	5	5	5	9	5	3	76
d__Bacteria	k__norank_d__Bacteria	p__Planctomycetes	c__Phycisphaerae	o__Tepidisphaerales	f__Tepidisphaeraceae	g__norank_f__Tepidisphaeraceae	s__unclassified_g__norank_f__Tepidisphaeraceae	OTU3009	1	2	2	4	0	0	1	0	0	0	2	0	12
d__Bacteria	k__norank_d__Bacteria	p__Actinobacteria	c__Actinobacteria	o__Rubrobacterales	f__Rubrobacteriaceae	g__Rubrobacter	s__unclassified_g__Rubrobacter	OTU999	319	23	109	72	67	24	231	209	220	110	29	57	1470
d__Bacteria	k__norank_d__Bacteria	p__Proteobacteria	c__Alphaproteobacteria	o__Rhizobiales	f__Hyphomicrobiaceae	g__Devosia	s__unclassified_g__Devosia	OTU1950	9	74	5	52	61	22	2	17	1	16	12	27	298
d__Bacteria	k__norank_d__Bacteria	p__Acidobacteria	c__Acidobacteria	o__unclassified_c__Acidobacteria	f__unclassified_c__Acidobacteria	g__unclassified_c__Acidobacteria	s__unclassified_c__Acidobacteria	OTU3023	1	0	1	2	0	0	0	0	0	0	0	0	4
d__Bacteria	k__norank_d__Bacteria	p__Planctomycetes	c__Phycisphaerae	o__Tepidisphaerales	f__Tepidisphaeraceae	g__norank_f__Tepidisphaeraceae	s__unclassified_g__norank_f__Tepidisphaeraceae	OTU3001	11	11	6	30	12	0	6	6	2	3	0	0	87
d__Bacteria	k__norank_d__Bacteria	p__Gemmatimonadetes	c__Gemmatimonadetes	o__Gemmatimonadales	f__Gemmatimonadaceae	g__norank_f__Gemmatimonadaceae	s__unclassified_g__norank_f__Gemmatimonadaceae	OTU2061	3	1	0	0	0	0	3	3	1	0	0	0	11
d__Bacteria	k__norank_d__Bacteria	p__Latescibacteria	c__norank_p__Latescibacteria	o__norank_p__Latescibacteria	f__norank_p__Latescibacteria	g__norank_p__Latescibacteria	s__uncultured_Acidobacterium_sp._g__norank_p__Latescibacteria	OTU300	11	3	4	3	0	0	9	3	2	1	1	3	40
d__Bacteria	k__norank_d__Bacteria	p__Acidobacteria	c__Acidobacteria	o__Subgroup_7	f__norank_o__Subgroup_7	g__norank_o__Subgroup_7	s__unclassified_g__norank_o__Subgroup_7	OTU48	1	0	7	3	0	1	1	0	0	0	0	0	13
d__Bacteria	k__norank_d__Bacteria	p__Proteobacteria	c__Betaproteobacteria	o__TRA3-20	f__norank_o__TRA3-20	g__norank_o__TRA3-20	s__unclassified_g__norank_o__TRA3-20	OTU2861	41	27	25	45	39	55	71	19	26	11	5	3	367
d__Bacteria	k__norank_d__Bacteria	p__Gemmatimonadetes	c__Gemmatimonadetes	o__Gemmatimonadales	f__Gemmatimonadaceae	g__norank_f__Gemmatimonadaceae	s__unclassified_g__norank_f__Gemmatimonadaceae	OTU2066	2	0	2	0	0	2	2	1	0	0	0	0	9
d__Bacteria	k__norank_d__Bacteria	p__Acidobacteria	c__Acidobacteria	o__norank_c__Acidobacteria	f__norank_c__Acidobacteria	g__norank_c__Acidobacteria	s__unclassified_g__norank_c__Acidobacteria	OTU2794	333	281	185	798	177	42	280	225	159	60	29	41	2610
d__Bacteria	k__norank_d__Bacteria	p__Cyanobacteria	c__Cyanobacteria	o__SubsectionIII	f__FamilyI_o__SubsectionIII	g__unclassified_f__FamilyI_o__SubsectionIII	s__unclassified_f__FamilyI_o__SubsectionIII	OTU981	1	0	12	1	0	0	0	2	1	0	0	0	17
d__Bacteria	k__norank_d__Bacteria	p__Proteobacteria	c__Deltaproteobacteria	o__Myxococcales	f__Polyangiaceae	g__Sorangium	s__unclassified_g__Sorangium	OTU1422	4	1	1	9	5	6	14	6	6	0	0	0	52
d__Bacteria	k__norank_d__Bacteria	p__Actinobacteria	c__Actinobacteria	o__Acidimicrobiales	f__Iamiaceae	g__Iamia	s__uncultured_Iamia_sp._g__Iamia	OTU3244	17	9	17	23	27	17	23	21	11	71	39	57	332
d__Bacteria	k__norank_d__Bacteria	p__Proteobacteria	c__Alphaproteobacteria	o__Rhizobiales	f__Rhizobiales_Incertae_Sedis	g__Agaricicola	s__unclassified_g__Agaricicola	OTU730	0	0	0	0	1	2	5	2	1	16	23	36	86
d__Bacteria	k__norank_d__Bacteria	p__Proteobacteria	c__Gammaproteobacteria	o__Xanthomonadales	f__Xanthomonadales_Incertae_Sedis	g__Acidibacter	s__uncultured_bacterium_g__Acidibacter	OTU724	9	4	4	13	20	17	7	9	8	6	16	18	131
d__Bacteria	k__norank_d__Bacteria	p__Proteobacteria	c__Deltaproteobacteria	o__Desulfurellales	f__Desulfurellaceae	g__H16	s__unclassified_g__H16	OTU2202	151	144	61	140	114	183	141	70	45	49	26	29	1153
d__Bacteria	k__norank_d__Bacteria	p__Gemmatimonadetes	c__Gemmatimonadetes	o__norank_c__Gemmatimonadetes	f__norank_c__Gemmatimonadetes	g__norank_c__Gemmatimonadetes	s__unclassified_g__norank_c__Gemmatimonadetes	OTU1916	1	0	0	1	0	0	2	1	1	0	0	1	7
d__Bacteria	k__norank_d__Bacteria	p__Acidobacteria	c__Acidobacteria	o__Blastocatellales	f__Blastocatellaceae__Subgroup_4_	g__Blastocatella	s__unclassified_g__Blastocatella	OTU235	5	1	3	0	0	0	3	4	0	0	0	0	16
d__Bacteria	k__norank_d__Bacteria	p__Proteobacteria	c__Deltaproteobacteria	o__Myxococcales	f__Haliangiaceae	g__Haliangium	s__uncultured_Kofleria_sp.	OTU2222	0	0	0	0	0	0	2	0	0	0	0	0	2
d__Bacteria	k__norank_d__Bacteria	p__Bacteroidetes	c__Sphingobacteriia	o__Sphingobacteriales	f__norank_o__Sphingobacteriales	g__norank_o__Sphingobacteriales	s__uncultured_Bacteroidetes_bacterium_g__norank_o__Sphingobacteriales	OTU1330	0	0	1	1	0	1	2	2	0	0	0	0	7
d__Bacteria	k__norank_d__Bacteria	p__Proteobacteria	c__Alphaproteobacteria	o__Rickettsiales	f__Mitochondria	g__norank_f__Mitochondria	s__unclassified_g__norank_f__Mitochondria	OTU1951	0	0	0	0	0	0	7	0	0	0	0	0	7
d__Bacteria	k__norank_d__Bacteria	p__Planctomycetes	c__Planctomycetacia	o__Planctomycetales	f__Planctomycetaceae	g__norank_f__Planctomycetaceae	s__uncultured_bacterium_g__norank_f__Planctomycetaceae	OTU1407	0	2	0	1	2	0	0	3	0	0	0	0	8
d__Bacteria	k__norank_d__Bacteria	p__Proteobacteria	c__Alphaproteobacteria	o__Sphingomonadales	f__Sphingomonadaceae	g__Sphingomonas	s__unclassified_g__Sphingomonas	OTU1150	129	94	60	163	165	154	251	144	137	52	16	34	1399
d__Bacteria	k__norank_d__Bacteria	p__Chloroflexi	c__Ardenticatenia	o__norank_c__Ardenticatenia	f__norank_c__Ardenticatenia	g__norank_c__Ardenticatenia	s__unclassified_g__norank_c__Ardenticatenia	OTU2177	0	0	0	0	0	0	3	1	1	0	0	0	5
d__Bacteria	k__norank_d__Bacteria	p__Acidobacteria	c__Acidobacteria	o__norank_c__Acidobacteria	f__norank_c__Acidobacteria	g__norank_c__Acidobacteria	s__unclassified_g__norank_c__Acidobacteria	OTU2313	65	39	34	118	22	7	39	30	40	60	15	27	496
d__Bacteria	k__norank_d__Bacteria	p__Chloroflexi	c__TK10	o__norank_c__TK10	f__norank_c__TK10	g__norank_c__TK10	s__uncultured_bacterium_g__norank_c__TK10	OTU1434	37	16	5	23	41	15	46	63	26	1	0	0	273
d__Bacteria	k__norank_d__Bacteria	p__Planctomycetes	c__Planctomycetacia	o__Planctomycetales	f__Planctomycetaceae	g__Gemmata	s__unclassified_g__Gemmata	OTU1282	10	6	7	2	6	1	7	8	6	7	2	4	66
d__Bacteria	k__norank_d__Bacteria	p__Actinobacteria	c__Actinobacteria	o__Acidimicrobiales	f__Iamiaceae	g__Iamia	s__uncultured_Actinomycetales_bacterium_g__Iamia	OTU346	5	7	2	13	6	13	18	7	7	23	11	13	125
d__Bacteria	k__norank_d__Bacteria	p__Planctomycetes	c__Planctomycetacia	o__Planctomycetales	f__Planctomycetaceae	g__norank_f__Planctomycetaceae	s__unclassified_g__norank_f__Planctomycetaceae	OTU3165	3	2	2	2	1	0	4	6	2	1	0	0	23
d__Bacteria	k__norank_d__Bacteria	p__Planctomycetes	c__Planctomycetacia	o__Planctomycetales	f__Planctomycetaceae	g__norank_f__Planctomycetaceae	s__unclassified_g__norank_f__Planctomycetaceae	OTU3161	3	3	4	11	1	0	2	2	0	0	0	0	26
d__Bacteria	k__norank_d__Bacteria	p__Actinobacteria	c__Actinobacteria	o__Gaiellales	f__Gaiellaceae	g__Gaiella	s__uncultured_actinobacterium_g__Gaiella	OTU1955	5	3	3	4	4	4	7	3	5	3	2	3	46
d__Bacteria	k__norank_d__Bacteria	p__Acidobacteria	c__Acidobacteria	o__unclassified_c__Acidobacteria	f__unclassified_c__Acidobacteria	g__unclassified_c__Acidobacteria	s__unclassified_c__Acidobacteria	OTU1272	51	40	39	99	15	5	23	37	27	65	25	36	462
d__Bacteria	k__norank_d__Bacteria	p__Actinobacteria	c__Actinobacteria	o__Solirubrobacterales	f__Solirubrobacteraceae	g__Solirubrobacter	s__uncultured_Solirubrobacter_sp._g__Solirubrobacter	OTU3031	216	161	154	354	351	312	409	256	278	237	160	122	3010
d__Bacteria	k__norank_d__Bacteria	p__Actinobacteria	c__Actinobacteria	o__Pseudonocardiales	f__Pseudonocardiaceae	g__Actinophytocola	s__unclassified_g__Actinophytocola	OTU849	9	0	13	4	7	9	3	10	3	71	83	51	263
d__Bacteria	k__norank_d__Bacteria	p__Actinobacteria	c__Actinobacteria	o__Acidimicrobiales	f__norank_o__Acidimicrobiales	g__norank_o__Acidimicrobiales	s__unclassified_g__norank_o__Acidimicrobiales	OTU1714	3	4	2	6	4	4	9	2	0	4	5	6	49
d__Bacteria	k__norank_d__Bacteria	p__Chloroflexi	c__Chloroflexia	o__Chloroflexales	f__unclassified_o__Chloroflexales	g__unclassified_o__Chloroflexales	s__unclassified_o__Chloroflexales	OTU972	4	4	1	5	7	5	2	5	3	1	0	0	37
d__Bacteria	k__norank_d__Bacteria	p__Proteobacteria	c__Betaproteobacteria	o__Burkholderiales	f__Comamonadaceae	g__Hydrogenophaga	s__Hydrogenophaga_intermedia	OTU785	0	0	0	0	0	0	0	0	0	2	1	8	11
d__Bacteria	k__norank_d__Bacteria	p__Acidobacteria	c__Acidobacteria	o__Subgroup_10	f__unclassified_o__Subgroup_10	g__unclassified_o__Subgroup_10	s__unclassified_o__Subgroup_10	OTU1348	3	0	1	0	0	1	4	1	0	2	1	0	13
d__Bacteria	k__norank_d__Bacteria	p__Actinobacteria	c__Actinobacteria	o__Acidimicrobiales	f__norank_o__Acidimicrobiales	g__norank_o__Acidimicrobiales	s__unclassified_g__norank_o__Acidimicrobiales	OTU1711	4	0	4	3	1	2	19	6	11	0	0	0	50
d__Bacteria	k__norank_d__Bacteria	p__Chloroflexi	c__TK10	o__norank_c__TK10	f__norank_c__TK10	g__norank_c__TK10	s__unclassified_g__norank_c__TK10	OTU2360	9	9	1	18	17	8	16	16	7	1	0	0	102
d__Bacteria	k__norank_d__Bacteria	p__Chloroflexi	c__TK10	o__norank_c__TK10	f__norank_c__TK10	g__norank_c__TK10	s__unclassified_g__norank_c__TK10	OTU2363	21	9	3	15	15	18	13	28	6	6	2	5	141
d__Bacteria	k__norank_d__Bacteria	p__Proteobacteria	c__Deltaproteobacteria	o__Myxococcales	f__Sandaracinaceae	g__norank_f__Sandaracinaceae	s__uncultured_Polyangiaceae_bacterium_g__norank_f__Sandaracinaceae	OTU1905	1	0	2	5	3	3	13	5	4	1	2	2	41
d__Bacteria	k__norank_d__Bacteria	p__Proteobacteria	c__Betaproteobacteria	o__Burkholderiales	f__Burkholderiaceae	g__Burkholderia-Paraburkholderia	s__unclassified_g__Burkholderia-Paraburkholderia	OTU574	0	0	0	0	0	0	1	0	0	7	3	7	18
d__Bacteria	k__norank_d__Bacteria	p__Bacteroidetes	c__Sphingobacteriia	o__Sphingobacteriales	f__Chitinophagaceae	g__Niastella	s__unclassified_g__Niastella	OTU840	4	1	7	6	6	3	11	2	0	1	10	2	53
d__Bacteria	k__norank_d__Bacteria	p__Planctomycetes	c__Phycisphaerae	o__Tepidisphaerales	f__Tepidisphaeraceae	g__norank_f__Tepidisphaeraceae	s__uncultured_bacterium_g__norank_f__Tepidisphaeraceae	OTU2694	35	33	12	180	24	0	50	29	21	7	1	1	393
d__Bacteria	k__norank_d__Bacteria	p__Proteobacteria	c__Alphaproteobacteria	o__unclassified_c__Alphaproteobacteria	f__unclassified_c__Alphaproteobacteria	g__unclassified_c__Alphaproteobacteria	s__unclassified_c__Alphaproteobacteria	OTU811	0	0	0	0	0	0	0	0	0	2	3	0	5
d__Bacteria	k__norank_d__Bacteria	p__Proteobacteria	c__Deltaproteobacteria	o__Myxococcales	f__Sandaracinaceae	g__norank_f__Sandaracinaceae	s__uncultured_bacterium_g__norank_f__Sandaracinaceae	OTU196	2	1	3	1	0	0	2	1	0	0	1	1	12
d__Bacteria	k__norank_d__Bacteria	p__Chloroflexi	c__Thermomicrobia	o__JG30-KF-CM45	f__norank_o__JG30-KF-CM45	g__norank_o__JG30-KF-CM45	s__unclassified_g__norank_o__JG30-KF-CM45	OTU1270	0	0	0	1	0	1	1	4	1	1	1	0	10
d__Bacteria	k__norank_d__Bacteria	p__Proteobacteria	c__Deltaproteobacteria	o__Oligoflexales	f__0319-6G20	g__norank_f__0319-6G20	s__uncultured_bacterium_g__norank_f__0319-6G20	OTU1154	4	0	0	0	3	0	1	3	1	1	0	0	13
d__Bacteria	k__norank_d__Bacteria	p__Chloroflexi	c__Chloroflexia	o__Chloroflexales	f__Roseiflexaceae	g__Roseiflexus	s__uncultured_soil_bacterium_g__Roseiflexus	OTU2275	211	137	69	151	185	92	223	326	158	4	1	0	1557
d__Bacteria	k__norank_d__Bacteria	p__Proteobacteria	c__Alphaproteobacteria	o__Rhizobiales	f__Rhizobiales_Incertae_Sedis	g__Nordella	s__uncultured_alpha_proteobacterium_g__Nordella	OTU2199	220	133	97	174	170	153	421	196	177	31	20	23	1815
d__Bacteria	k__norank_d__Bacteria	p__Acidobacteria	c__Acidobacteria	o__norank_c__Acidobacteria	f__norank_c__Acidobacteria	g__norank_c__Acidobacteria	s__uncultured_Acidobacteriales_bacterium_g__norank_c__Acidobacteria	OTU2534	106	37	43	15	23	2	60	39	34	3	0	2	364
d__Bacteria	k__norank_d__Bacteria	p__Cyanobacteria	c__Cyanobacteria	o__norank_c__Cyanobacteria	f__norank_c__Cyanobacteria	g__norank_c__Cyanobacteria	s__unclassified_g__norank_c__Cyanobacteria	OTU2306	0	1	0	0	1	0	3	0	0	0	0	0	5
d__Bacteria	k__norank_d__Bacteria	p__Proteobacteria	c__Betaproteobacteria	o__Nitrosomonadales	f__Nitrosomonadaceae	g__norank_f__Nitrosomonadaceae	s__unclassified_g__norank_f__Nitrosomonadaceae	OTU1308	135	96	113	96	117	80	465	205	265	13	11	20	1616
d__Bacteria	k__norank_d__Bacteria	p__Chloroflexi	c__Chloroflexia	o__Kallotenuales	f__AKIW781	g__norank_f__AKIW781	s__uncultured_Chloroflexi_bacterium_g__norank_f__AKIW781	OTU2770	13	6	2	10	6	5	14	18	16	9	0	3	102
d__Bacteria	k__norank_d__Bacteria	p__Verrucomicrobia	c__OPB35_soil_group	o__norank_c__OPB35_soil_group	f__norank_c__OPB35_soil_group	g__norank_c__OPB35_soil_group	s__uncultured_subdivision_3_bacterium	OTU1390	15	1	2	12	6	0	12	4	0	0	0	0	52
d__Bacteria	k__norank_d__Bacteria	p__Proteobacteria	c__Deltaproteobacteria	o__Myxococcales	f__mle1-27	g__norank_f__mle1-27	s__uncultured_bacterium_g__norank_f__mle1-27	OTU1100	1	0	0	1	2	0	8	3	2	0	0	0	17
d__Bacteria	k__norank_d__Bacteria	p__Verrucomicrobia	c__Spartobacteria	o__Chthoniobacterales	f__Chthoniobacteraceae	g__Chthoniobacter	s__bacterium_Ellin507	OTU3033	7	7	6	8	3	0	1	2	0	2	1	0	37
d__Bacteria	k__norank_d__Bacteria	p__Proteobacteria	c__Alphaproteobacteria	o__Rhizobiales	f__Xanthobacteraceae	g__Pseudolabrys	s__unclassified_g__Pseudolabrys	OTU770	17	8	12	28	10	36	35	16	16	55	39	42	314
d__Bacteria	k__norank_d__Bacteria	p__Actinobacteria	c__Actinobacteria	o__Pseudonocardiales	f__Pseudonocardiaceae	g__Pseudonocardia	s__unclassified_g__Pseudonocardia	OTU3167	141	59	69	211	128	139	233	114	101	167	61	95	1518
d__Bacteria	k__norank_d__Bacteria	p__Proteobacteria	c__Gammaproteobacteria	o__Legionellales	f__Legionellaceae	g__Legionella	s__unclassified_g__Legionella	OTU1414	0	0	0	0	1	0	2	5	0	0	0	0	8
d__Bacteria	k__norank_d__Bacteria	p__Firmicutes	c__Bacilli	o__Bacillales	f__Bacillaceae	g__Bacillus	s__unclassified_g__Bacillus	OTU1206	37	16	19	59	36	26	93	86	42	15	13	19	461
d__Bacteria	k__norank_d__Bacteria	p__Firmicutes	c__Bacilli	o__Bacillales	f__Bacillaceae	g__Bacillus	s__Bacillus_gibsonii	OTU1920	1	1	3	2	4	1	1	0	4	1	0	0	18
d__Bacteria	k__norank_d__Bacteria	p__Actinobacteria	c__Actinobacteria	o__Acidimicrobiales	f__norank_o__Acidimicrobiales	g__norank_o__Acidimicrobiales	s__unclassified_g__norank_o__Acidimicrobiales	OTU53	3	1	5	9	0	4	5	2	2	2	0	0	33
d__Bacteria	k__norank_d__Bacteria	p__Proteobacteria	c__Deltaproteobacteria	o__Myxococcales	f__MSB-4B10	g__norank_f__MSB-4B10	s__uncultured_bacterium_g__norank_f__MSB-4B10	OTU2173	2	1	1	1	1	1	4	1	4	0	0	0	16
d__Bacteria	k__norank_d__Bacteria	p__Chloroflexi	c__Caldilineae	o__Caldilineales	f__Caldilineaceae	g__norank_f__Caldilineaceae	s__unclassified_g__norank_f__Caldilineaceae	OTU286	3	1	0	3	0	0	0	0	0	0	0	0	7
d__Bacteria	k__norank_d__Bacteria	p__Proteobacteria	c__Betaproteobacteria	o__Nitrosomonadales	f__Nitrosomonadaceae	g__norank_f__Nitrosomonadaceae	s__uncultured_Burkholderiales_bacterium_g__norank_f__Nitrosomonadaceae	OTU3035	56	64	58	137	98	62	212	70	105	17	8	9	896
d__Bacteria	k__norank_d__Bacteria	p__Actinobacteria	c__Actinobacteria	o__Acidimicrobiales	f__norank_o__Acidimicrobiales	g__norank_o__Acidimicrobiales	s__unclassified_g__norank_o__Acidimicrobiales	OTU904	0	0	0	0	2	1	2	0	1	4	6	4	20
d__Bacteria	k__norank_d__Bacteria	p__Actinobacteria	c__Actinobacteria	o__Acidimicrobiales	f__norank_o__Acidimicrobiales	g__norank_o__Acidimicrobiales	s__uncultured_Acidothermaceae_bacterium	OTU3004	99	78	62	172	97	130	183	122	100	177	103	155	1478
d__Bacteria	k__norank_d__Bacteria	p__Actinobacteria	c__Actinobacteria	o__Acidimicrobiales	f__norank_o__Acidimicrobiales	g__norank_o__Acidimicrobiales	s__unclassified_g__norank_o__Acidimicrobiales	OTU1136	38	17	25	43	13	35	88	46	61	186	58	81	691
d__Bacteria	k__norank_d__Bacteria	p__Chloroflexi	c__TK10	o__norank_c__TK10	f__norank_c__TK10	g__norank_c__TK10	s__uncultured_Chloroflexus_sp._g__norank_c__TK10	OTU2544	145	85	47	113	171	60	142	208	64	10	7	3	1055
d__Bacteria	k__norank_d__Bacteria	p__Acidobacteria	c__Acidobacteria	o__norank_c__Acidobacteria	f__norank_c__Acidobacteria	g__norank_c__Acidobacteria	s__wastewater_metagenome_g__norank_c__Acidobacteria	OTU2328	36	6	9	9	15	3	5	8	16	7	1	3	118
d__Bacteria	k__norank_d__Bacteria	p__Actinobacteria	c__Actinobacteria	o__Solirubrobacterales	f__0319-6M6	g__norank_f__0319-6M6	s__unclassified_g__norank_f__0319-6M6	OTU2524	43	23	26	41	45	63	80	49	73	32	6	12	493
d__Bacteria	k__norank_d__Bacteria	p__Planctomycetes	c__Planctomycetacia	o__Planctomycetales	f__Planctomycetaceae	g__norank_f__Planctomycetaceae	s__unclassified_g__norank_f__Planctomycetaceae	OTU1140	0	0	0	0	0	0	0	2	2	0	0	0	4
d__Bacteria	k__norank_d__Bacteria	p__Gemmatimonadetes	c__Gemmatimonadetes	o__Gemmatimonadales	f__Gemmatimonadaceae	g__norank_f__Gemmatimonadaceae	s__Gemmatimonadetes_bacterium_WY71	OTU691	0	0	0	1	0	1	0	0	0	0	1	3	6
d__Bacteria	k__norank_d__Bacteria	p__Gemmatimonadetes	c__Gemmatimonadetes	o__Longimicrobiales	f__Longimicrobiaceae	g__norank_f__Longimicrobiaceae	s__uncultured_bacterium_g__norank_f__Longimicrobiaceae	OTU218	8	1	1	5	3	0	8	7	4	0	0	0	37
d__Bacteria	k__norank_d__Bacteria	p__Chloroflexi	c__TK10	o__norank_c__TK10	f__norank_c__TK10	g__norank_c__TK10	s__uncultured_bacterium_g__norank_c__TK10	OTU2156	9	7	0	1	4	4	9	21	10	5	2	2	74
d__Bacteria	k__norank_d__Bacteria	p__Planctomycetes	c__Planctomycetacia	o__Planctomycetales	f__Planctomycetaceae	g__norank_f__Planctomycetaceae	s__unclassified_g__norank_f__Planctomycetaceae	OTU1147	13	4	2	2	1	0	12	10	9	0	0	1	54
d__Bacteria	k__norank_d__Bacteria	p__Proteobacteria	c__Gammaproteobacteria	o__Salinisphaerales	f__Salinisphaeraceae	g__norank_f__Salinisphaeraceae	s__uncultured_bacterium_g__norank_f__Salinisphaeraceae	OTU2433	1	6	5	6	8	8	10	1	0	3	0	0	48
d__Bacteria	k__norank_d__Bacteria	p__WS2	c__norank_p__WS2	o__norank_p__WS2	f__norank_p__WS2	g__norank_p__WS2	s__uncultured_soil_bacterium_g__norank_p__WS2	OTU260	3	1	0	3	0	0	1	1	0	1	0	1	11
d__Bacteria	k__norank_d__Bacteria	p__Acidobacteria	c__Acidobacteria	o__norank_c__Acidobacteria	f__norank_c__Acidobacteria	g__norank_c__Acidobacteria	s__unclassified_g__norank_c__Acidobacteria	OTU56	8	7	8	15	2	1	11	4	3	1	0	1	61
d__Bacteria	k__norank_d__Bacteria	p__Actinobacteria	c__Actinobacteria	o__Acidimicrobiales	f__unclassified_o__Acidimicrobiales	g__unclassified_o__Acidimicrobiales	s__unclassified_o__Acidimicrobiales	OTU316	3	0	0	2	1	1	0	3	1	0	0	0	11
d__Bacteria	k__norank_d__Bacteria	p__Firmicutes	c__Bacilli	o__Bacillales	f__Paenibacillaceae	g__Paenibacillus	s__unclassified_g__Paenibacillus	OTU3121	4	2	0	44	2	4	2	2	0	2	2	3	67
d__Bacteria	k__norank_d__Bacteria	p__Acidobacteria	c__Acidobacteria	o__Subgroup_10	f__ABS-19	g__norank_f__ABS-19	s__unclassified_g__norank_f__ABS-19	OTU2208	23	5	6	37	31	80	56	47	47	0	0	0	332
d__Bacteria	k__norank_d__Bacteria	p__Proteobacteria	c__Deltaproteobacteria	o__unclassified_c__Deltaproteobacteria	f__unclassified_c__Deltaproteobacteria	g__unclassified_c__Deltaproteobacteria	s__unclassified_c__Deltaproteobacteria	OTU2009	1	0	0	0	0	0	2	0	0	1	0	0	4
d__Bacteria	k__norank_d__Bacteria	p__Actinobacteria	c__Actinobacteria	o__Solirubrobacterales	f__288-2	g__norank_f__288-2	s__uncultured_bacterium_g__norank_f__288-2	OTU597	2	2	1	3	5	2	6	2	4	11	4	4	46
d__Bacteria	k__norank_d__Bacteria	p__Acidobacteria	c__Acidobacteria	o__Solibacterales	f__Solibacteraceae__Subgroup_3_	g__Candidatus_Solibacter	s__unclassified_g__Candidatus_Solibacter	OTU1983	4	3	5	7	21	5	7	5	2	1	2	0	62
d__Bacteria	k__norank_d__Bacteria	p__unclassified_k__norank_d__Bacteria	c__unclassified_k__norank_d__Bacteria	o__unclassified_k__norank_d__Bacteria	f__unclassified_k__norank_d__Bacteria	g__unclassified_k__norank_d__Bacteria	s__unclassified_k__norank_d__Bacteria	OTU2612	0	0	0	0	0	0	1	1	1	0	0	0	3
d__Bacteria	k__norank_d__Bacteria	p__Firmicutes	c__Bacilli	o__Bacillales	f__Paenibacillaceae	g__Paenibacillus	s__unclassified_g__Paenibacillus	OTU3128	4	0	5	13	8	8	3	3	1	1	0	0	46
d__Bacteria	k__norank_d__Bacteria	p__Acidobacteria	c__Acidobacteria	o__Blastocatellales	f__Blastocatellaceae__Subgroup_4_	g__RB41	s__unclassified_g__RB41	OTU1106	961	416	457	158	276	37	423	329	329	83	32	24	3525
d__Bacteria	k__norank_d__Bacteria	p__Proteobacteria	c__Alphaproteobacteria	o__Caulobacterales	f__Caulobacteraceae	g__Phenylobacterium	s__uncultured_organism_g__Phenylobacterium	OTU1735	4	3	1	7	6	5	13	6	6	14	15	11	91
d__Bacteria	k__norank_d__Bacteria	p__Nitrospirae	c__Nitrospira	o__norank_c__Nitrospira	f__norank_c__Nitrospira	g__Nitrospira	s__unclassified_g__Nitrospira	OTU2850	12	9	3	8	14	12	8	9	3	4	0	1	83
d__Bacteria	k__norank_d__Bacteria	p__Chloroflexi	c__unclassified_p__Chloroflexi	o__unclassified_p__Chloroflexi	f__unclassified_p__Chloroflexi	g__unclassified_p__Chloroflexi	s__unclassified_p__Chloroflexi	OTU1248	11	4	5	3	6	1	12	12	1	0	0	0	55
d__Bacteria	k__norank_d__Bacteria	p__Bacteroidetes	c__Sphingobacteriia	o__Sphingobacteriales	f__Sphingobacteriaceae	g__unclassified_f__Sphingobacteriaceae	s__unclassified_f__Sphingobacteriaceae	OTU2397	4	3	2	4	4	3	8	6	1	1	6	0	42
d__Bacteria	k__norank_d__Bacteria	p__Acidobacteria	c__Acidobacteria	o__Subgroup_10	f__ABS-19	g__norank_f__ABS-19	s__unclassified_g__norank_f__ABS-19	OTU620	4	2	1	1	2	0	7	3	1	14	0	1	36
d__Bacteria	k__norank_d__Bacteria	p__Chloroflexi	c__TK10	o__norank_c__TK10	f__norank_c__TK10	g__norank_c__TK10	s__Chloroflexi_bacterium_JEA33	OTU311	6	2	1	3	6	3	0	2	3	1	0	0	27
d__Bacteria	k__norank_d__Bacteria	p__Proteobacteria	c__Gammaproteobacteria	o__Xanthomonadales	f__Xanthomonadales_Incertae_Sedis	g__Acidibacter	s__unclassified_g__Acidibacter	OTU907	11	5	6	11	9	11	15	4	5	5	3	0	85
d__Bacteria	k__norank_d__Bacteria	p__Actinobacteria	c__Actinobacteria	o__Acidimicrobiales	f__Acidimicrobiaceae	g__CL500-29_marine_group	s__unclassified_g__CL500-29_marine_group	OTU2906	19	10	20	25	15	26	46	33	36	36	7	9	282
d__Bacteria	k__norank_d__Bacteria	p__Bacteroidetes	c__Sphingobacteriia	o__Sphingobacteriales	f__Chitinophagaceae	g__Niastella	s__uncultured_bacterium_g__Niastella	OTU2455	10	4	7	5	10	8	34	1	6	1	12	1	99
d__Bacteria	k__norank_d__Bacteria	p__Verrucomicrobia	c__Spartobacteria	o__Chthoniobacterales	f__Chthoniobacteraceae	g__Chthoniobacter	s__unclassified_g__Chthoniobacter	OTU1170	2	0	0	0	0	0	0	0	3	0	0	0	5
d__Bacteria	k__norank_d__Bacteria	p__Saccharibacteria	c__norank_p__Saccharibacteria	o__norank_p__Saccharibacteria	f__norank_p__Saccharibacteria	g__norank_p__Saccharibacteria	s__unclassified_g__norank_p__Saccharibacteria	OTU3282	1	0	0	1	6	0	0	0	1	1	1	0	11
d__Bacteria	k__norank_d__Bacteria	p__Actinobacteria	c__Actinobacteria	o__Micromonosporales	f__Micromonosporaceae	g__unclassified_f__Micromonosporaceae	s__unclassified_f__Micromonosporaceae	OTU1186	25	12	17	61	23	43	50	21	27	57	30	23	389
d__Bacteria	k__norank_d__Bacteria	p__Proteobacteria	c__Deltaproteobacteria	o__Myxococcales	f__Haliangiaceae	g__Haliangium	s__uncultured_Haliangium_sp.	OTU6	3	1	4	1	4	0	1	1	0	0	0	1	16
d__Bacteria	k__norank_d__Bacteria	p__Proteobacteria	c__Betaproteobacteria	o__TRA3-20	f__norank_o__TRA3-20	g__norank_o__TRA3-20	s__unclassified_g__norank_o__TRA3-20	OTU3022	8	7	9	25	12	36	6	2	4	1	8	5	123
d__Bacteria	k__norank_d__Bacteria	p__Acidobacteria	c__Acidobacteria	o__Subgroup_7	f__norank_o__Subgroup_7	g__norank_o__Subgroup_7	s__uncultured_bacterium_g__norank_o__Subgroup_7	OTU2240	72	52	34	33	25	56	42	35	36	0	2	0	387
d__Bacteria	k__norank_d__Bacteria	p__Firmicutes	c__Clostridia	o__Clostridiales	f__Lachnospiraceae	g__Blautia	s__Ruminococcus_sp._5_1_39BFAA	OTU209	3	3	0	0	2	4	0	0	0	0	0	0	12
d__Bacteria	k__norank_d__Bacteria	p__Chloroflexi	c__Chloroflexia	o__Kallotenuales	f__AKIW781	g__norank_f__AKIW781	s__uncultured_bacterium_g__norank_f__AKIW781	OTU2117	1	1	1	1	0	1	1	0	0	1	0	0	7
d__Bacteria	k__norank_d__Bacteria	p__Planctomycetes	c__Planctomycetacia	o__Planctomycetales	f__Planctomycetaceae	g__norank_f__Planctomycetaceae	s__unclassified_g__norank_f__Planctomycetaceae	OTU1327	4	0	0	7	1	0	3	3	3	0	0	1	22
d__Bacteria	k__norank_d__Bacteria	p__Proteobacteria	c__Gammaproteobacteria	o__Xanthomonadales	f__Xanthomonadaceae	g__Chiayiivirga	s__uncultured_bacterium_g__Chiayiivirga	OTU915	0	0	0	0	0	0	0	0	0	6	18	1	25
d__Bacteria	k__norank_d__Bacteria	p__Firmicutes	c__Bacilli	o__Bacillales	f__Thermoactinomycetaceae	g__Laceyella	s__Laceyella_sacchari	OTU1504	0	0	1	14	3	1	1	0	4	0	0	0	24
d__Bacteria	k__norank_d__Bacteria	p__Planctomycetes	c__Planctomycetacia	o__Planctomycetales	f__Planctomycetaceae	g__norank_f__Planctomycetaceae	s__unclassified_g__norank_f__Planctomycetaceae	OTU1323	2	0	0	1	0	0	1	2	0	0	0	0	6
d__Bacteria	k__norank_d__Bacteria	p__Proteobacteria	c__Gammaproteobacteria	o__Legionellales	f__Coxiellaceae	g__Aquicella	s__unclassified_g__Aquicella	OTU203	7	1	0	0	3	1	5	0	0	0	0	0	17
d__Bacteria	k__norank_d__Bacteria	p__Deinococcus-Thermus	c__Deinococci	o__Deinococcales	f__Trueperaceae	g__Truepera	s__uncultured_Deinococcales_bacterium	OTU804	0	2	0	0	6	1	0	2	1	4	2	1	19
d__Bacteria	k__norank_d__Bacteria	p__Chloroflexi	c__Anaerolineae	o__Anaerolineales	f__Anaerolineaceae	g__norank_f__Anaerolineaceae	s__unclassified_g__norank_f__Anaerolineaceae	OTU457	2	14	3	7	6	0	4	0	2	9	5	0	52
d__Bacteria	k__norank_d__Bacteria	p__Planctomycetes	c__Phycisphaerae	o__Tepidisphaerales	f__Tepidisphaeraceae	g__norank_f__Tepidisphaeraceae	s__uncultured_bacterium_g__norank_f__Tepidisphaeraceae	OTU3006	6	1	2	31	8	0	7	7	5	0	0	0	67
d__Bacteria	k__norank_d__Bacteria	p__Proteobacteria	c__Alphaproteobacteria	o__Rhizobiales	f__JG34-KF-361	g__norank_f__JG34-KF-361	s__uncultured_bacterium_g__norank_f__JG34-KF-361	OTU734	7	1	2	7	4	9	12	10	2	39	18	18	129
d__Bacteria	k__norank_d__Bacteria	p__Planctomycetes	c__BD7-11	o__norank_c__BD7-11	f__norank_c__BD7-11	g__norank_c__BD7-11	s__uncultured_Planctomycetaceae_bacterium_g__norank_c__BD7-11	OTU3056	2	1	1	2	1	0	0	1	0	0	0	0	8
d__Bacteria	k__norank_d__Bacteria	p__Proteobacteria	c__Deltaproteobacteria	o__Myxococcales	f__Sandaracinaceae	g__Sandaracinus	s__uncultured_delta_proteobacterium_g__Sandaracinus	OTU1066	1	0	0	0	0	0	1	1	3	0	0	0	6
d__Bacteria	k__norank_d__Bacteria	p__Deinococcus-Thermus	c__Deinococci	o__Deinococcales	f__Deinococcaceae	g__Deinococcus	s__Deinococcus_deserti_VCD115	OTU517	0	0	0	0	0	0	0	0	0	7	0	1	8
d__Bacteria	k__norank_d__Bacteria	p__Acidobacteria	c__Acidobacteria	o__unclassified_c__Acidobacteria	f__unclassified_c__Acidobacteria	g__unclassified_c__Acidobacteria	s__unclassified_c__Acidobacteria	OTU1475	4	0	1	0	1	0	0	2	0	0	0	0	8
d__Bacteria	k__norank_d__Bacteria	p__Actinobacteria	c__Actinobacteria	o__Streptosporangiales	f__Thermomonosporaceae	g__Actinocorallia	s__uncultured_bacterium_g__Actinocorallia	OTU35	12	11	22	2	3	0	0	0	0	0	0	0	50
d__Bacteria	k__norank_d__Bacteria	p__Chloroflexi	c__JG30-KF-CM66	o__norank_c__JG30-KF-CM66	f__norank_c__JG30-KF-CM66	g__norank_c__JG30-KF-CM66	s__uncultured_Chloroflexi_bacterium_g__norank_c__JG30-KF-CM66	OTU3036	3	4	0	10	11	6	0	1	0	3	0	1	39
d__Bacteria	k__norank_d__Bacteria	p__Armatimonadetes	c__norank_p__Armatimonadetes	o__norank_p__Armatimonadetes	f__norank_p__Armatimonadetes	g__norank_p__Armatimonadetes	s__unclassified_g__norank_p__Armatimonadetes	OTU338	4	3	1	5	2	2	1	0	2	1	0	0	21
d__Bacteria	k__norank_d__Bacteria	p__unclassified_k__norank_d__Bacteria	c__unclassified_k__norank_d__Bacteria	o__unclassified_k__norank_d__Bacteria	f__unclassified_k__norank_d__Bacteria	g__unclassified_k__norank_d__Bacteria	s__unclassified_k__norank_d__Bacteria	OTU386	4	1	0	0	1	3	0	2	2	4	1	0	18
d__Bacteria	k__norank_d__Bacteria	p__Actinobacteria	c__Actinobacteria	o__Acidimicrobiales	f__norank_o__Acidimicrobiales	g__norank_o__Acidimicrobiales	s__unclassified_g__norank_o__Acidimicrobiales	OTU3138	4	1	3	7	2	6	10	2	2	0	0	0	37
d__Bacteria	k__norank_d__Bacteria	p__Acidobacteria	c__Acidobacteria	o__norank_c__Acidobacteria	f__norank_c__Acidobacteria	g__norank_c__Acidobacteria	s__unclassified_g__norank_c__Acidobacteria	OTU1149	196	84	90	57	47	14	83	78	101	15	11	14	790
d__Bacteria	k__norank_d__Bacteria	p__Proteobacteria	c__Deltaproteobacteria	o__Myxococcales	f__Haliangiaceae	g__Haliangium	s__uncultured_Nannocystineae_bacterium_g__Haliangium	OTU2147	6	10	6	12	6	7	22	8	5	2	1	3	88
d__Bacteria	k__norank_d__Bacteria	p__unclassified_k__norank_d__Bacteria	c__unclassified_k__norank_d__Bacteria	o__unclassified_k__norank_d__Bacteria	f__unclassified_k__norank_d__Bacteria	g__unclassified_k__norank_d__Bacteria	s__unclassified_k__norank_d__Bacteria	OTU278	78	5	15	21	53	13	51	57	30	16	7	21	367
d__Bacteria	k__norank_d__Bacteria	p__Actinobacteria	c__Actinobacteria	o__unclassified_c__Actinobacteria	f__unclassified_c__Actinobacteria	g__unclassified_c__Actinobacteria	s__unclassified_c__Actinobacteria	OTU1117	1	0	2	0	0	0	1	3	3	0	0	0	10
d__Bacteria	k__norank_d__Bacteria	p__Bacteroidetes	c__Sphingobacteriia	o__Sphingobacteriales	f__Chitinophagaceae	g__Niastella	s__uncultured_Chitinophagaceae_bacterium_g__Niastella	OTU2227	2	1	1	8	2	5	12	5	4	3	7	3	53
d__Bacteria	k__norank_d__Bacteria	p__Planctomycetes	c__Planctomycetacia	o__Planctomycetales	f__Planctomycetaceae	g__norank_f__Planctomycetaceae	s__unclassified_g__norank_f__Planctomycetaceae	OTU267	10	0	2	3	3	2	4	1	3	1	0	0	29
d__Bacteria	k__norank_d__Bacteria	p__Proteobacteria	c__Gammaproteobacteria	o__Legionellales	f__Coxiellaceae	g__Coxiella	s__unclassified_g__Coxiella	OTU164	1	1	0	1	0	0	1	1	1	0	0	0	6
d__Bacteria	k__norank_d__Bacteria	p__Proteobacteria	c__Gammaproteobacteria	o__Xanthomonadales	f__norank_o__Xanthomonadales	g__norank_o__Xanthomonadales	s__unclassified_g__norank_o__Xanthomonadales	OTU2330	0	2	5	2	0	2	3	1	3	0	0	0	18
d__Bacteria	k__norank_d__Bacteria	p__Chloroflexi	c__Anaerolineae	o__Anaerolineales	f__Anaerolineaceae	g__norank_f__Anaerolineaceae	s__uncultured_sludge_bacterium_H8	OTU1393	4	0	0	5	5	0	0	3	0	0	0	0	17
d__Bacteria	k__norank_d__Bacteria	p__Proteobacteria	c__Gammaproteobacteria	o__Xanthomonadales	f__Xanthomonadaceae	g__Stenotrophomonas	s__Stenotrophomonas_chelatiphaga	OTU68	0	0	5	1	0	4	0	0	0	1	2	5	18
d__Bacteria	k__norank_d__Bacteria	p__Proteobacteria	c__Deltaproteobacteria	o__Myxococcales	f__Haliangiaceae	g__Haliangium	s__uncultured_prokaryote_g__Haliangium	OTU883	2	1	3	0	1	1	3	2	2	5	4	1	25
d__Bacteria	k__norank_d__Bacteria	p__Nitrospirae	c__Nitrospira	o__norank_c__Nitrospira	f__norank_c__Nitrospira	g__Nitrospira	s__unclassified_g__Nitrospira	OTU1553	8	7	1	4	5	10	6	0	1	3	4	4	53
d__Bacteria	k__norank_d__Bacteria	p__Verrucomicrobia	c__OPB35_soil_group	o__norank_c__OPB35_soil_group	f__norank_c__OPB35_soil_group	g__norank_c__OPB35_soil_group	s__uncultured_subdivision_3_bacterium	OTU2284	130	8	51	18	25	4	105	11	29	0	1	0	382
d__Bacteria	k__norank_d__Bacteria	p__Planctomycetes	c__Phycisphaerae	o__Tepidisphaerales	f__Tepidisphaeraceae	g__norank_f__Tepidisphaeraceae	s__uncultured_soil_bacterium_g__norank_f__Tepidisphaeraceae	OTU2553	2	8	0	26	3	1	32	8	19	0	0	0	99
d__Bacteria	k__norank_d__Bacteria	p__Chloroflexi	c__Anaerolineae	o__Anaerolineales	f__Anaerolineaceae	g__norank_f__Anaerolineaceae	s__unclassified_g__norank_f__Anaerolineaceae	OTU1219	7	9	2	6	6	1	9	6	2	0	0	0	48
d__Bacteria	k__norank_d__Bacteria	p__Actinobacteria	c__Actinobacteria	o__Solirubrobacterales	f__0319-6M6	g__norank_f__0319-6M6	s__unclassified_g__norank_f__0319-6M6	OTU1261	1	6	3	9	7	7	10	3	4	27	6	13	96
d__Bacteria	k__norank_d__Bacteria	p__Proteobacteria	c__Betaproteobacteria	o__Burkholderiales	f__Alcaligenaceae	g__norank_f__Alcaligenaceae	s__unclassified_g__norank_f__Alcaligenaceae	OTU2353	1	0	1	10	0	1	3	3	0	4	0	2	25
d__Bacteria	k__norank_d__Bacteria	p__Chloroflexi	c__Anaerolineae	o__Anaerolineales	f__Anaerolineaceae	g__norank_f__Anaerolineaceae	s__unclassified_g__norank_f__Anaerolineaceae	OTU10	15	1	11	1	1	1	4	2	1	0	0	0	37
d__Bacteria	k__norank_d__Bacteria	p__Planctomycetes	c__Planctomycetacia	o__Planctomycetales	f__Planctomycetaceae	g__unclassified_f__Planctomycetaceae	s__unclassified_f__Planctomycetaceae	OTU1503	8	3	3	1	2	0	6	3	5	0	0	0	31
d__Bacteria	k__norank_d__Bacteria	p__Proteobacteria	c__Alphaproteobacteria	o__Rhodospirillales	f__AKYH478	g__norank_f__AKYH478	s__uncultured_bacterium_g__norank_f__AKYH478	OTU693	0	0	1	1	0	1	4	0	1	2	4	3	17
d__Bacteria	k__norank_d__Bacteria	p__Bacteroidetes	c__Cytophagia	o__Cytophagales	f__Cytophagaceae	g__Ohtaekwangia	s__uncultured_bacterium_g__Ohtaekwangia	OTU1376	3	2	3	2	0	0	1	1	0	0	1	1	14
d__Bacteria	k__norank_d__Bacteria	p__Planctomycetes	c__Planctomycetacia	o__Planctomycetales	f__Planctomycetaceae	g__norank_f__Planctomycetaceae	s__uncultured_bacterium_g__norank_f__Planctomycetaceae	OTU323	3	2	0	1	2	1	2	5	1	1	0	0	18
d__Bacteria	k__norank_d__Bacteria	p__Chloroflexi	c__Thermomicrobia	o__JG30-KF-CM45	f__norank_o__JG30-KF-CM45	g__norank_o__JG30-KF-CM45	s__unclassified_g__norank_o__JG30-KF-CM45	OTU415	0	1	0	0	0	1	0	1	1	0	0	0	4
d__Bacteria	k__norank_d__Bacteria	p__Actinobacteria	c__Actinobacteria	o__Euzebyales	f__Euzebyaceae	g__unclassified_f__Euzebyaceae	s__unclassified_f__Euzebyaceae	OTU1802	17	7	11	15	12	22	27	18	15	21	8	4	177
d__Bacteria	k__norank_d__Bacteria	p__Gemmatimonadetes	c__Gemmatimonadetes	o__norank_c__Gemmatimonadetes	f__norank_c__Gemmatimonadetes	g__norank_c__Gemmatimonadetes	s__uncultured_soil_bacterium_g__norank_c__Gemmatimonadetes	OTU1543	9	5	6	16	28	13	8	3	2	2	0	0	92
d__Bacteria	k__norank_d__Bacteria	p__Proteobacteria	c__Betaproteobacteria	o__SC-I-84	f__norank_o__SC-I-84	g__norank_o__SC-I-84	s__unclassified_g__norank_o__SC-I-84	OTU2543	24	4	17	6	8	8	25	13	11	3	3	4	126
d__Bacteria	k__norank_d__Bacteria	p__Proteobacteria	c__Alphaproteobacteria	o__unclassified_c__Alphaproteobacteria	f__unclassified_c__Alphaproteobacteria	g__unclassified_c__Alphaproteobacteria	s__unclassified_c__Alphaproteobacteria	OTU2932	1	0	0	0	0	5	0	3	0	1	1	0	11
d__Bacteria	k__norank_d__Bacteria	p__Gemmatimonadetes	c__Gemmatimonadetes	o__norank_c__Gemmatimonadetes	f__norank_c__Gemmatimonadetes	g__norank_c__Gemmatimonadetes	s__unclassified_g__norank_c__Gemmatimonadetes	OTU423	3	9	3	14	11	2	10	3	3	1	0	1	60
d__Bacteria	k__norank_d__Bacteria	p__Chloroflexi	c__Thermomicrobia	o__JG30-KF-CM45	f__norank_o__JG30-KF-CM45	g__norank_o__JG30-KF-CM45	s__uncultured_bacterium_g__norank_o__JG30-KF-CM45	OTU2435	7	23	15	7	4	7	8	6	6	97	36	36	252
d__Bacteria	k__norank_d__Bacteria	p__Proteobacteria	c__Alphaproteobacteria	o__unclassified_c__Alphaproteobacteria	f__unclassified_c__Alphaproteobacteria	g__unclassified_c__Alphaproteobacteria	s__unclassified_c__Alphaproteobacteria	OTU2936	0	0	0	0	0	3	0	0	0	0	0	0	3
d__Bacteria	k__norank_d__Bacteria	p__Actinobacteria	c__Actinobacteria	o__Corynebacteriales	f__Nocardiaceae	g__Nocardia	s__unclassified_g__Nocardia	OTU2614	3	1	0	11	3	3	3	1	3	0	0	1	29
d__Bacteria	k__norank_d__Bacteria	p__Chloroflexi	c__Ardenticatenia	o__Ardenticatenales	f__norank_o__Ardenticatenales	g__norank_o__Ardenticatenales	s__uncultured_Chloroflexus_sp._g__norank	OTU1809	21	25	10	55	120	26	25	16	10	0	0	0	308
d__Bacteria	k__norank_d__Bacteria	p__Proteobacteria	c__Alphaproteobacteria	o__Rhizobiales	f__Methylobacteriaceae	g__Microvirga	s__uncultured_alpha_proteobacterium_g__Microvirga	OTU973	1	0	0	2	2	1	6	1	3	12	3	3	34
d__Bacteria	k__norank_d__Bacteria	p__Proteobacteria	c__Alphaproteobacteria	o__Sphingomonadales	f__Sphingomonadaceae	g__unclassified_f__Sphingomonadaceae	s__unclassified_f__Sphingomonadaceae	OTU842	0	0	0	0	0	0	0	0	0	14	10	8	32
d__Bacteria	k__norank_d__Bacteria	p__Planctomycetes	c__Planctomycetacia	o__Planctomycetales	f__Planctomycetaceae	g__Planctomyces	s__unclassified_g__Planctomyces	OTU3134	0	0	0	5	1	0	0	0	0	0	0	0	6
d__Bacteria	k__norank_d__Bacteria	p__Armatimonadetes	c__norank_p__Armatimonadetes	o__norank_p__Armatimonadetes	f__norank_p__Armatimonadetes	g__norank_p__Armatimonadetes	s__uncultured_bacterium_g__norank_p__Armatimonadetes	OTU358	2	8	2	0	3	5	4	7	1	12	0	0	44
d__Bacteria	k__norank_d__Bacteria	p__Proteobacteria	c__Alphaproteobacteria	o__Rhizobiales	f__JG34-KF-361	g__norank_f__JG34-KF-361	s__uncultured_alpha_proteobacterium_g__norank_f__JG34-KF-361	OTU771	9	6	9	17	8	19	5	5	4	34	22	15	153
d__Bacteria	k__norank_d__Bacteria	p__Proteobacteria	c__Alphaproteobacteria	o__Rhizobiales	f__Rhizobiales_Incertae_Sedis	g__Agaricicola	s__uncultured_bacterium_g__Agaricicola	OTU657	1	0	0	3	1	3	0	0	0	44	15	11	78
d__Bacteria	k__norank_d__Bacteria	p__Planctomycetes	c__Planctomycetacia	o__Planctomycetales	f__Planctomycetaceae	g__Pir4_lineage	s__unclassified_g__Pir4_lineage	OTU153	4	3	0	2	0	0	1	1	1	0	0	0	12
d__Bacteria	k__norank_d__Bacteria	p__Proteobacteria	c__Gammaproteobacteria	o__Gammaproteobacteria_Incertae_Sedis	f__Unknown_Family_o__Gammaproteobacteria_Incertae_Sedis	g__norank_f__Unknown_Family_o__Gammaproteobacteria_Incertae_Sedis	s__uncultured_soil_bacterium_g__norank_f__Unknown_Family	OTU3258	2	0	0	3	2	4	2	1	0	0	0	0	14
d__Bacteria	k__norank_d__Bacteria	p__Proteobacteria	c__Deltaproteobacteria	o__NB1-j	f__norank_o__NB1-j	g__norank_o__NB1-j	s__unclassified_g__norank_o__NB1-j	OTU2947	0	0	0	0	0	13	0	0	0	0	0	0	13
d__Bacteria	k__norank_d__Bacteria	p__Proteobacteria	c__Alphaproteobacteria	o__Rhizobiales	f__FFCH5858	g__norank_f__FFCH5858	s__unclassified_g__norank_f__FFCH5858	OTU2299	15	8	17	18	9	11	33	18	30	0	0	0	159
d__Bacteria	k__norank_d__Bacteria	p__Actinobacteria	c__Actinobacteria	o__Acidimicrobiales	f__norank_o__Acidimicrobiales	g__norank_o__Acidimicrobiales	s__unclassified_g__norank_o__Acidimicrobiales	OTU245	18	10	6	14	15	12	24	6	5	9	2	2	123
d__Bacteria	k__norank_d__Bacteria	p__Gemmatimonadetes	c__Gemmatimonadetes	o__Gemmatimonadales	f__Gemmatimonadaceae	g__Gemmatirosa	s__uncultured_bacterium_g__Gemmatirosa	OTU2507	12	4	3	15	14	11	10	1	5	1	0	0	76
d__Bacteria	k__norank_d__Bacteria	p__Planctomycetes	c__Planctomycetacia	o__Planctomycetales	f__Planctomycetaceae	g__norank_f__Planctomycetaceae	s__unclassified_g__norank_f__Planctomycetaceae	OTU288	3	3	2	2	0	0	1	4	0	1	0	0	16
d__Bacteria	k__norank_d__Bacteria	p__Proteobacteria	c__Alphaproteobacteria	o__Rhizobiales	f__Methylobacteriaceae	g__Microvirga	s__Microvirga_vignae	OTU2692	290	151	233	305	250	283	526	257	220	921	301	270	4007
d__Bacteria	k__norank_d__Bacteria	p__Proteobacteria	c__Gammaproteobacteria	o__Legionellales	f__Coxiellaceae	g__Aquicella	s__unclassified_g__Aquicella	OTU795	0	0	0	0	0	0	0	0	0	2	0	1	3
d__Bacteria	k__norank_d__Bacteria	p__Proteobacteria	c__Deltaproteobacteria	o__Myxococcales	f__Sandaracinaceae	g__norank_f__Sandaracinaceae	s__uncultured_soil_bacterium_g__norank_f__Sandaracinaceae	OTU1915	1	1	1	0	0	0	3	0	0	1	0	0	7
d__Bacteria	k__norank_d__Bacteria	p__Actinobacteria	c__Actinobacteria	o__Micrococcales	f__Cellulomonadaceae	g__Cellulomonas	s__unclassified_g__Cellulomonas	OTU1640	1	8	7	13	14	7	16	10	21	30	28	35	190
d__Bacteria	k__norank_d__Bacteria	p__Chloroflexi	c__Anaerolineae	o__Anaerolineales	f__Anaerolineaceae	g__norank_f__Anaerolineaceae	s__uncultured_Caldilineaceae_bacterium_g__norank_f__Anaerolineaceae	OTU276	35	107	15	33	43	4	48	23	21	7	4	1	341
d__Bacteria	k__norank_d__Bacteria	p__Proteobacteria	c__Gammaproteobacteria	o__Legionellales	f__Coxiellaceae	g__Aquicella	s__unclassified_g__Aquicella	OTU554	0	0	0	0	0	0	0	0	0	2	0	0	2
d__Bacteria	k__norank_d__Bacteria	p__Planctomycetes	c__unclassified_p__Planctomycetes	o__unclassified_p__Planctomycetes	f__unclassified_p__Planctomycetes	g__unclassified_p__Planctomycetes	s__unclassified_p__Planctomycetes	OTU2870	2	0	0	1	0	0	2	0	1	0	0	0	6
d__Bacteria	k__norank_d__Bacteria	p__Firmicutes	c__Clostridia	o__Clostridiales	f__Peptococcaceae	g__Desulfitobacterium	s__unclassified_g__Desulfitobacterium	OTU2266	1	2	0	2	1	1	2	0	1	0	0	0	10
d__Bacteria	k__norank_d__Bacteria	p__Planctomycetes	c__Phycisphaerae	o__Tepidisphaerales	f__Tepidisphaeraceae	g__norank_f__Tepidisphaeraceae	s__unclassified_g__norank_f__Tepidisphaeraceae	OTU230	5	4	3	18	2	0	7	2	9	1	0	0	51
d__Bacteria	k__norank_d__Bacteria	p__Actinobacteria	c__Actinobacteria	o__Micromonosporales	f__Micromonosporaceae	g__norank_f__Micromonosporaceae	s__uncultured_actinobacterium_g__norank_f__Micromonosporaceae	OTU563	6	1	4	3	0	3	4	2	0	19	3	6	51
d__Bacteria	k__norank_d__Bacteria	p__Bacteroidetes	c__Flavobacteriia	o__Flavobacteriales	f__Cryomorphaceae	g__unclassified_f__Cryomorphaceae	s__unclassified_f__Cryomorphaceae	OTU3302	0	1	0	1	2	0	2	0	0	1	0	0	7
d__Bacteria	k__norank_d__Bacteria	p__Chloroflexi	c__Chloroflexia	o__Chloroflexales	f__Roseiflexaceae	g__Roseiflexus	s__uncultured_soil_bacterium_g__Roseiflexus	OTU1566	7	5	0	3	12	0	9	15	6	0	0	0	57
d__Bacteria	k__norank_d__Bacteria	p__Planctomycetes	c__Planctomycetacia	o__Planctomycetales	f__Planctomycetaceae	g__Rhodopirellula	s__uncultured_bacterium_g__Rhodopirellula	OTU3100	0	0	0	13	3	1	2	1	0	7	0	0	27
d__Bacteria	k__norank_d__Bacteria	p__Planctomycetes	c__OM190	o__norank_c__OM190	f__norank_c__OM190	g__norank_c__OM190	s__uncultured_bacterium_g__norank_c__OM190	OTU113	3	1	2	1	2	1	2	1	1	1	0	0	15
d__Bacteria	k__norank_d__Bacteria	p__Chloroflexi	c__Chloroflexia	o__Chloroflexales	f__Roseiflexaceae	g__Roseiflexus	s__uncultured_bacterium_g__Roseiflexus	OTU243	7	0	0	0	0	1	1	0	1	0	0	0	10
d__Bacteria	k__norank_d__Bacteria	p__Proteobacteria	c__Alphaproteobacteria	o__Sphingomonadales	f__Erythrobacteraceae	g__Altererythrobacter	s__uncultured_bacterium_g__Altererythrobacter	OTU1067	22	23	20	73	49	64	45	24	15	29	28	22	414
d__Bacteria	k__norank_d__Bacteria	p__Proteobacteria	c__Gammaproteobacteria	o__Xanthomonadales	f__Xanthomonadaceae	g__norank_f__Xanthomonadaceae	s__Aquimonas_sp._enrichment_culture_clone_03SUJ1	OTU1610	5	5	6	4	1	6	7	8	1	14	11	5	73
d__Bacteria	k__norank_d__Bacteria	p__Chloroflexi	c__unclassified_p__Chloroflexi	o__unclassified_p__Chloroflexi	f__unclassified_p__Chloroflexi	g__unclassified_p__Chloroflexi	s__unclassified_p__Chloroflexi	OTU1873	33	25	10	34	34	32	26	44	18	0	0	4	260
d__Bacteria	k__norank_d__Bacteria	p__Chloroflexi	c__Anaerolineae	o__Anaerolineales	f__Anaerolineaceae	g__norank_f__Anaerolineaceae	s__unclassified_g__norank_f__Anaerolineaceae	OTU2400	15	8	1	2	11	0	34	12	12	0	0	0	95
d__Bacteria	k__norank_d__Bacteria	p__Planctomycetes	c__OM190	o__norank_c__OM190	f__norank_c__OM190	g__norank_c__OM190	s__uncultured_Planctomycetales_bacterium_g__norank_c__OM190	OTU3150	2	2	1	7	3	0	1	0	0	0	0	0	16
d__Bacteria	k__norank_d__Bacteria	p__Acidobacteria	c__Acidobacteria	o__Blastocatellales	f__Blastocatellaceae__Subgroup_4_	g__norank_f__Blastocatellaceae__Subgroup_4_	s__uncultured_bacterium_g__norank_f__Blastocatellaceae__Subgroup_4_	OTU1839	1	0	0	0	0	0	2	0	0	0	0	0	3
d__Bacteria	k__norank_d__Bacteria	p__Proteobacteria	c__Alphaproteobacteria	o__Rhodospirillales	f__MSB-1E8	g__norank_f__MSB-1E8	s__uncultured_bacterium_g__norank_f__MSB-1E8	OTU2082	4	3	1	1	4	2	5	1	1	0	0	0	22
d__Bacteria	k__norank_d__Bacteria	p__Actinobacteria	c__Actinobacteria	o__Frankiales	f__norank_o__Frankiales	g__norank_o__Frankiales	s__uncultured_actinobacterium_g__norank_o__Frankiales	OTU796	0	0	0	0	0	3	2	4	2	12	6	11	40
d__Bacteria	k__norank_d__Bacteria	p__Armatimonadetes	c__Armatimonadia	o__Armatimonadales	f__norank_o__Armatimonadales	g__norank_o__Armatimonadales	s__unclassified_g__norank_o__Armatimonadales	OTU530	1	0	0	0	0	0	0	0	1	11	0	3	16
d__Bacteria	k__norank_d__Bacteria	p__Gemmatimonadetes	c__Gemmatimonadetes	o__Gemmatimonadales	f__Gemmatimonadaceae	g__unclassified_f__Gemmatimonadaceae	s__unclassified_f__Gemmatimonadaceae	OTU3016	0	10	1	16	3	13	0	0	0	0	0	0	43
d__Bacteria	k__norank_d__Bacteria	p__Chloroflexi	c__Chloroflexia	o__Herpetosiphonales	f__Herpetosiphonaceae	g__Herpetosiphon	s__uncultured_Chloroflexi_bacterium_g__Herpetosiphon	OTU637	0	0	0	0	0	0	0	0	0	5	1	0	6
d__Bacteria	k__norank_d__Bacteria	p__Proteobacteria	c__Gammaproteobacteria	o__Xanthomonadales	f__norank_o__Xanthomonadales	g__norank_o__Xanthomonadales	s__unclassified_g__norank_o__Xanthomonadales	OTU2475	74	85	54	160	100	96	74	62	53	50	49	25	882
d__Bacteria	k__norank_d__Bacteria	p__Actinobacteria	c__Actinobacteria	o__Gaiellales	f__norank_o__Gaiellales	g__norank_o__Gaiellales	s__unclassified_g__norank_o__Gaiellales	OTU1110	8	4	7	7	7	7	12	11	8	2	2	0	75
d__Bacteria	k__norank_d__Bacteria	p__Chloroflexi	c__unclassified_p__Chloroflexi	o__unclassified_p__Chloroflexi	f__unclassified_p__Chloroflexi	g__unclassified_p__Chloroflexi	s__unclassified_p__Chloroflexi	OTU460	5	2	0	1	2	3	0	2	0	1	0	0	16
d__Bacteria	k__norank_d__Bacteria	p__Actinobacteria	c__Actinobacteria	o__Gaiellales	f__norank_o__Gaiellales	g__norank_o__Gaiellales	s__unclassified_g__norank_o__Gaiellales	OTU1115	0	1	0	0	0	1	2	2	2	0	0	3	11
d__Bacteria	k__norank_d__Bacteria	p__Planctomycetes	c__Planctomycetacia	o__Planctomycetales	f__Planctomycetaceae	g__Pirellula	s__unclassified_g__Pirellula	OTU360	2	3	6	1	2	0	1	0	0	4	0	0	19
d__Bacteria	k__norank_d__Bacteria	p__Firmicutes	c__Clostridia	o__Clostridiales	f__unclassified_o__Clostridiales	g__unclassified_o__Clostridiales	s__unclassified_o__Clostridiales	OTU2125	3	2	0	2	0	6	1	2	0	0	0	0	16
d__Bacteria	k__norank_d__Bacteria	p__Proteobacteria	c__Alphaproteobacteria	o__Rhizobiales	f__Xanthobacteraceae	g__Variibacter	s__uncultured_proteobacterium_g__Variibacter	OTU2366	168	104	111	172	141	173	320	119	150	155	87	122	1822
d__Bacteria	k__norank_d__Bacteria	p__Proteobacteria	c__Betaproteobacteria	o__Burkholderiales	f__Alcaligenaceae	g__norank_f__Alcaligenaceae	s__uncultured_beta_proteobacterium_g__norank_f__Alcaligenaceae	OTU1581	1	2	3	0	0	0	5	0	0	3	2	6	22
d__Bacteria	k__norank_d__Bacteria	p__Proteobacteria	c__Deltaproteobacteria	o__Myxococcales	f__unclassified_o__Myxococcales	g__unclassified_o__Myxococcales	s__unclassified_o__Myxococcales	OTU3223	0	0	0	3	4	2	0	1	0	0	0	0	10
d__Bacteria	k__norank_d__Bacteria	p__Chloroflexi	c__Anaerolineae	o__Anaerolineales	f__Anaerolineaceae	g__norank_f__Anaerolineaceae	s__unclassified_g__norank_f__Anaerolineaceae	OTU1989	1	1	0	0	2	1	2	0	1	0	0	0	8
d__Bacteria	k__norank_d__Bacteria	p__Proteobacteria	c__Betaproteobacteria	o__Burkholderiales	f__Oxalobacteraceae	g__unclassified_f__Oxalobacteraceae	s__unclassified_f__Oxalobacteraceae	OTU750	9	4	10	15	6	15	8	10	6	66	37	57	243
d__Bacteria	k__norank_d__Bacteria	p__Chloroflexi	c__Ardenticatenia	o__norank_c__Ardenticatenia	f__norank_c__Ardenticatenia	g__norank_c__Ardenticatenia	s__unclassified_g__norank_c__Ardenticatenia	OTU2463	6	5	2	9	3	2	6	7	5	2	0	0	47
d__Bacteria	k__norank_d__Bacteria	p__Proteobacteria	c__Deltaproteobacteria	o__Myxococcales	f__Vulgatibacteraceae	g__Vulgatibacter	s__unclassified_g__Vulgatibacter	OTU154	1	1	0	2	2	3	0	0	0	1	0	1	11
d__Bacteria	k__norank_d__Bacteria	p__Proteobacteria	c__Alphaproteobacteria	o__Rhodospirillales	f__Acetobacteraceae	g__Roseomonas	s__unclassified_g__Roseomonas	OTU19	2	2	2	0	1	0	0	0	0	2	3	5	17
d__Bacteria	k__norank_d__Bacteria	p__Proteobacteria	c__Alphaproteobacteria	o__Rhodobacterales	f__Rhodobacteraceae	g__Oceanicella	s__Rhodovulum_sp._SMB1	OTU1885	22	24	13	32	30	50	50	15	22	2	3	4	267
d__Bacteria	k__norank_d__Bacteria	p__Firmicutes	c__Bacilli	o__Bacillales	f__Alicyclobacillaceae	g__Tumebacillus	s__unclassified_g__Tumebacillus	OTU1018	6	5	0	5	5	1	2	8	10	0	0	0	42
d__Bacteria	k__norank_d__Bacteria	p__Chloroflexi	c__Anaerolineae	o__Anaerolineales	f__Anaerolineaceae	g__norank_f__Anaerolineaceae	s__unclassified_g__norank_f__Anaerolineaceae	OTU1073	2	5	3	9	1	0	2	0	1	0	0	0	23
d__Bacteria	k__norank_d__Bacteria	p__Bacteroidetes	c__Cytophagia	o__Cytophagales	f__Cytophagaceae	g__Adhaeribacter	s__uncultured_bacterium_g__Adhaeribacter	OTU520	0	0	0	0	0	0	0	0	0	7	1	1	9
d__Bacteria	k__norank_d__Bacteria	p__Acidobacteria	c__Acidobacteria	o__norank_c__Acidobacteria	f__norank_c__Acidobacteria	g__norank_c__Acidobacteria	s__unclassified_g__norank_c__Acidobacteria	OTU2404	17	4	9	26	1	2	25	17	5	0	0	0	106
d__Bacteria	k__norank_d__Bacteria	p__Proteobacteria	c__Deltaproteobacteria	o__Myxococcales	f__Haliangiaceae	g__Haliangium	s__unclassified_g__Haliangium	OTU1040	17	12	5	17	12	2	67	40	28	2	1	1	204
d__Bacteria	k__norank_d__Bacteria	p__Proteobacteria	c__Alphaproteobacteria	o__Rhodospirillales	f__MSB-1E8	g__norank_f__MSB-1E8	s__uncultured_bacterium_g__norank_f__MSB-1E8	OTU1193	0	0	0	0	2	1	3	3	1	0	0	0	10
d__Bacteria	k__norank_d__Bacteria	p__Chloroflexi	c__Anaerolineae	o__Anaerolineales	f__Anaerolineaceae	g__norank_f__Anaerolineaceae	s__unclassified_g__norank_f__Anaerolineaceae	OTU1078	105	45	14	21	24	3	36	12	15	0	0	0	275
d__Bacteria	k__norank_d__Bacteria	p__Actinobacteria	c__Actinobacteria	o__Propionibacteriales	f__Nocardioidaceae	g__unclassified_f__Nocardioidaceae	s__unclassified_f__Nocardioidaceae	OTU1466	27	30	19	39	101	52	76	55	38	76	22	33	568
d__Bacteria	k__norank_d__Bacteria	p__Gemmatimonadetes	c__Gemmatimonadetes	o__Longimicrobiales	f__Longimicrobiaceae	g__norank_f__Longimicrobiaceae	s__uncultured_bacterium_g__norank_f__Longimicrobiaceae	OTU875	0	0	0	1	2	4	0	0	0	11	6	5	29
d__Bacteria	k__norank_d__Bacteria	p__Armatimonadetes	c__Fimbriimonadia	o__Fimbriimonadales	f__Fimbriimonadaceae	g__norank_f__Fimbriimonadaceae	s__uncultured_bacterium_g__norank_f__Fimbriimonadaceae	OTU580	0	0	1	2	0	0	1	0	0	6	2	1	13
d__Bacteria	k__norank_d__Bacteria	p__Actinobacteria	c__Actinobacteria	o__Pseudonocardiales	f__Pseudonocardiaceae	g__Pseudonocardia	s__unclassified_g__Pseudonocardia	OTU3028	4	0	1	7	7	5	5	2	1	18	7	8	65
d__Bacteria	k__norank_d__Bacteria	p__Latescibacteria	c__norank_p__Latescibacteria	o__norank_p__Latescibacteria	f__norank_p__Latescibacteria	g__norank_p__Latescibacteria	s__unclassified_g__norank_p__Latescibacteria	OTU485	1	1	1	0	0	0	0	0	2	0	0	0	5
d__Bacteria	k__norank_d__Bacteria	p__Chloroflexi	c__Chloroflexia	o__Chloroflexales	f__FFCH7168	g__norank_f__FFCH7168	s__uncultured_bacterium_g__norank_f__FFCH7168	OTU2460	0	3	2	0	1	0	10	6	1	0	0	0	23
d__Bacteria	k__norank_d__Bacteria	p__Bacteroidetes	c__Cytophagia	o__Cytophagales	f__Cytophagaceae	g__Pontibacter	s__unclassified_g__Pontibacter	OTU1712	6	11	8	16	22	22	6	8	0	2	0	2	103
d__Bacteria	k__norank_d__Bacteria	p__Proteobacteria	c__Gammaproteobacteria	o__Xanthomonadales	f__norank_o__Xanthomonadales	g__norank_o__Xanthomonadales	s__unclassified_g__norank_o__Xanthomonadales	OTU1307	28	14	21	41	34	36	40	23	15	8	6	4	270
d__Bacteria	k__norank_d__Bacteria	p__Acidobacteria	c__Acidobacteria	o__Blastocatellales	f__Blastocatellaceae__Subgroup_4_	g__RB41	s__unclassified_g__RB41	OTU2644	28	16	11	54	11	2	27	29	23	28	5	7	241
d__Bacteria	k__norank_d__Bacteria	p__Chloroflexi	c__Thermomicrobia	o__JG30-KF-CM45	f__norank_o__JG30-KF-CM45	g__norank_o__JG30-KF-CM45	s__uncultured_bacterium_g__norank_o__JG30-KF-CM45	OTU2231	80	188	55	76	83	139	49	45	47	54	22	19	857
d__Bacteria	k__norank_d__Bacteria	p__Actinobacteria	c__Actinobacteria	o__unclassified_c__Actinobacteria	f__unclassified_c__Actinobacteria	g__unclassified_c__Actinobacteria	s__unclassified_c__Actinobacteria	OTU557	0	0	0	0	0	0	0	0	0	8	1	1	10
d__Bacteria	k__norank_d__Bacteria	p__Actinobacteria	c__Actinobacteria	o__Acidimicrobiales	f__norank_o__Acidimicrobiales	g__norank_o__Acidimicrobiales	s__unclassified_g__norank_o__Acidimicrobiales	OTU1112	2	1	8	8	5	4	18	7	7	1	0	1	62
d__Bacteria	k__norank_d__Bacteria	p__Planctomycetes	c__Planctomycetacia	o__Planctomycetales	f__Planctomycetaceae	g__Planctomyces	s__unclassified_g__Planctomyces	OTU698	2	1	0	3	0	0	0	1	0	3	1	2	13
d__Bacteria	k__norank_d__Bacteria	p__Chloroflexi	c__KD4-96	o__norank_c__KD4-96	f__norank_c__KD4-96	g__norank_c__KD4-96	s__unclassified_g__norank_c__KD4-96	OTU1028	21	4	9	4	10	1	4	4	11	1	1	2	72
d__Bacteria	k__norank_d__Bacteria	p__Acidobacteria	c__Acidobacteria	o__Blastocatellales	f__Blastocatellaceae__Subgroup_4_	g__DS-100	s__uncultured_bacterium_g__DS-100	OTU1423	8	6	4	14	7	2	3	9	1	0	0	0	54
d__Bacteria	k__norank_d__Bacteria	p__Actinobacteria	c__Actinobacteria	o__norank_c__Actinobacteria	f__norank_c__Actinobacteria	g__norank_c__Actinobacteria	s__unclassified_g__norank_c__Actinobacteria	OTU2264	55	2	14	3	6	2	20	11	26	0	0	0	139
d__Bacteria	k__norank_d__Bacteria	p__Planctomycetes	c__OM190	o__norank_c__OM190	f__norank_c__OM190	g__norank_c__OM190	s__uncultured_bacterium_g__norank_c__OM190	OTU2902	0	0	0	2	0	4	0	0	0	0	1	0	7
d__Bacteria	k__norank_d__Bacteria	p__Actinobacteria	c__Actinobacteria	o__Acidimicrobiales	f__norank_o__Acidimicrobiales	g__norank_o__Acidimicrobiales	s__unclassified_g__norank_o__Acidimicrobiales	OTU1655	2	2	3	9	12	6	9	5	5	0	1	0	54
d__Bacteria	k__norank_d__Bacteria	p__Nitrospirae	c__Nitrospira	o__norank_c__Nitrospira	f__norank_c__Nitrospira	g__Nitrospira	s__Nitrospira_sp.	OTU2549	29	29	14	20	21	21	35	14	2	15	2	11	213
d__Bacteria	k__norank_d__Bacteria	p__Proteobacteria	c__Alphaproteobacteria	o__Rhizobiales	f__Hyphomicrobiaceae	g__Rhodomicrobium	s__unclassified_g__Rhodomicrobium	OTU3114	26	27	29	100	46	56	29	21	16	4	18	5	377
d__Bacteria	k__norank_d__Bacteria	p__Proteobacteria	c__ARKICE-90	o__norank_c__ARKICE-90	f__norank_c__ARKICE-90	g__norank_c__ARKICE-90	s__uncultured_proteobacterium_g__norank_c__ARKICE-90	OTU1696	19	20	18	23	14	26	53	36	24	11	4	4	252
d__Bacteria	k__norank_d__Bacteria	p__Planctomycetes	c__Planctomycetacia	o__Planctomycetales	f__Planctomycetaceae	g__norank_f__Planctomycetaceae	s__uncultured_endolithic_bacterium_g__norank_f__Planctomycetaceae	OTU3162	8	2	3	17	8	0	7	4	3	15	2	5	74
d__Bacteria	k__norank_d__Bacteria	p__unclassified_k__norank_d__Bacteria	c__unclassified_k__norank_d__Bacteria	o__unclassified_k__norank_d__Bacteria	f__unclassified_k__norank_d__Bacteria	g__unclassified_k__norank_d__Bacteria	s__unclassified_k__norank_d__Bacteria	OTU2673	20	13	16	10	15	22	65	33	17	3	2	0	216
d__Bacteria	k__norank_d__Bacteria	p__Planctomycetes	c__Planctomycetacia	o__Planctomycetales	f__Planctomycetaceae	g__Planctomyces	s__unclassified_g__Planctomyces	OTU561	1	1	1	7	5	1	0	0	0	4	0	0	20
d__Bacteria	k__norank_d__Bacteria	p__Firmicutes	c__Clostridia	o__Clostridiales	f__Peptococcaceae	g__unclassified_f__Peptococcaceae	s__unclassified_f__Peptococcaceae	OTU3088	0	1	0	3	0	0	0	0	1	0	0	0	5
d__Bacteria	k__norank_d__Bacteria	p__Gemmatimonadetes	c__Gemmatimonadetes	o__Longimicrobiales	f__Longimicrobiaceae	g__norank_f__Longimicrobiaceae	s__unclassified_g__norank_f__Longimicrobiaceae	OTU1166	1	0	2	9	1	1	1	0	2	12	3	4	36
d__Bacteria	k__norank_d__Bacteria	p__Acidobacteria	c__Acidobacteria	o__Solibacterales	f__Solibacteraceae__Subgroup_3_	g__Candidatus_Solibacter	s__unclassified_g__Candidatus_Solibacter	OTU2047	3	1	3	2	5	2	2	2	0	0	0	1	21
d__Bacteria	k__norank_d__Bacteria	p__Actinobacteria	c__Actinobacteria	o__Gaiellales	f__norank_o__Gaiellales	g__norank_o__Gaiellales	s__unclassified_g__norank_o__Gaiellales	OTU564	4	3	2	7	5	6	11	4	9	13	7	12	83
d__Bacteria	k__norank_d__Bacteria	p__Planctomycetes	c__Planctomycetacia	o__Planctomycetales	f__Planctomycetaceae	g__norank_f__Planctomycetaceae	s__uncultured_bacterium_g__norank_f__Planctomycetaceae	OTU183	2	1	0	2	1	0	1	1	0	0	0	0	8
d__Bacteria	k__norank_d__Bacteria	p__Actinobacteria	c__Actinobacteria	o__Gaiellales	f__norank_o__Gaiellales	g__norank_o__Gaiellales	s__unclassified_g__norank_o__Gaiellales	OTU1596	4	3	2	8	3	4	14	2	5	2	0	1	48
d__Bacteria	k__norank_d__Bacteria	p__Proteobacteria	c__Gammaproteobacteria	o__Xanthomonadales	f__Xanthomonadales_Incertae_Sedis	g__Steroidobacter	s__unclassified_g__Steroidobacter	OTU1451	14	11	11	23	16	20	23	20	9	23	1	5	176
d__Bacteria	k__norank_d__Bacteria	p__Planctomycetes	c__Planctomycetacia	o__Planctomycetales	f__Planctomycetaceae	g__Planctomyces	s__unclassified_g__Planctomyces	OTU1965	1	2	0	9	4	0	1	0	1	9	1	0	28
d__Bacteria	k__norank_d__Bacteria	p__Armatimonadetes	c__norank_p__Armatimonadetes	o__norank_p__Armatimonadetes	f__norank_p__Armatimonadetes	g__norank_p__Armatimonadetes	s__uncultured_soil_bacterium_g__norank_p__Armatimonadetes	OTU2278	0	3	0	1	2	3	1	4	4	0	0	0	18
d__Bacteria	k__norank_d__Bacteria	p__Proteobacteria	c__Alphaproteobacteria	o__Rhodobacterales	f__Rhodobacteraceae	g__Rubellimicrobium	s__uncultured_bacterium_g__Rubellimicrobium	OTU2139	7	3	16	17	8	18	20	20	7	12	4	7	139
d__Bacteria	k__norank_d__Bacteria	p__Actinobacteria	c__Actinobacteria	o__Micromonosporales	f__Micromonosporaceae	g__unclassified_f__Micromonosporaceae	s__unclassified_f__Micromonosporaceae	OTU1401	0	1	0	5	4	1	0	2	0	0	1	0	14
d__Bacteria	k__norank_d__Bacteria	p__Chloroflexi	c__Thermomicrobia	o__JG30-KF-CM45	f__norank_o__JG30-KF-CM45	g__norank_o__JG30-KF-CM45	s__unclassified_g__norank_o__JG30-KF-CM45	OTU1465	0	4	0	1	0	0	0	1	0	2	0	0	8
d__Bacteria	k__norank_d__Bacteria	p__Proteobacteria	c__Deltaproteobacteria	o__Myxococcales	f__Polyangiaceae	g__unclassified_f__Polyangiaceae	s__unclassified_f__Polyangiaceae	OTU1224	0	0	0	4	18	0	2	5	5	0	0	0	34
d__Bacteria	k__norank_d__Bacteria	p__Gemmatimonadetes	c__Gemmatimonadetes	o__Gemmatimonadales	f__Gemmatimonadaceae	g__norank_f__Gemmatimonadaceae	s__unclassified_g__norank_f__Gemmatimonadaceae	OTU2392	1	1	0	2	1	4	4	6	1	0	0	0	20
d__Bacteria	k__norank_d__Bacteria	p__Actinobacteria	c__Actinobacteria	o__Micromonosporales	f__Micromonosporaceae	g__unclassified_f__Micromonosporaceae	s__unclassified_f__Micromonosporaceae	OTU1157	1	2	0	7	4	3	6	4	5	6	0	0	38
d__Bacteria	k__norank_d__Bacteria	p__unclassified_k__norank_d__Bacteria	c__unclassified_k__norank_d__Bacteria	o__unclassified_k__norank_d__Bacteria	f__unclassified_k__norank_d__Bacteria	g__unclassified_k__norank_d__Bacteria	s__unclassified_k__norank_d__Bacteria	OTU1395	1	0	0	1	0	1	4	2	1	1	0	0	11
d__Bacteria	k__norank_d__Bacteria	p__Planctomycetes	c__Phycisphaerae	o__mle1-8	f__norank_o__mle1-8	g__norank_o__mle1-8	s__uncultured_bacterium_g__norank_o__mle1-8	OTU1569	3	0	0	1	1	1	2	4	1	0	0	0	13
d__Bacteria	k__norank_d__Bacteria	p__Chloroflexi	c__Anaerolineae	o__Anaerolineales	f__Anaerolineaceae	g__norank_f__Anaerolineaceae	s__uncultured_sludge_bacterium_S14	OTU885	1	8	2	1	5	1	0	1	0	3	4	5	31
d__Bacteria	k__norank_d__Bacteria	p__Chloroflexi	c__JG30-KF-CM66	o__norank_c__JG30-KF-CM66	f__norank_c__JG30-KF-CM66	g__norank_c__JG30-KF-CM66	s__unclassified_g__norank_c__JG30-KF-CM66	OTU1880	15	16	6	19	19	8	14	18	11	27	6	3	162
d__Bacteria	k__norank_d__Bacteria	p__Actinobacteria	c__Actinobacteria	o__Acidimicrobiales	f__Acidimicrobiaceae	g__norank_f__Acidimicrobiaceae	s__unclassified_g__norank_f__Acidimicrobiaceae	OTU3201	0	0	0	0	1	2	3	1	0	1	0	0	8
d__Bacteria	k__norank_d__Bacteria	p__Proteobacteria	c__Alphaproteobacteria	o__Rhodospirillales	f__unclassified_o__Rhodospirillales	g__unclassified_o__Rhodospirillales	s__unclassified_o__Rhodospirillales	OTU603	1	0	0	5	0	2	1	2	0	12	5	6	34
d__Bacteria	k__norank_d__Bacteria	p__Proteobacteria	c__Gammaproteobacteria	o__unclassified_c__Gammaproteobacteria	f__unclassified_c__Gammaproteobacteria	g__unclassified_c__Gammaproteobacteria	s__unclassified_c__Gammaproteobacteria	OTU2954	0	0	0	2	0	3	0	0	0	0	0	0	5
d__Bacteria	k__norank_d__Bacteria	p__Chloroflexi	c__unclassified_p__Chloroflexi	o__unclassified_p__Chloroflexi	f__unclassified_p__Chloroflexi	g__unclassified_p__Chloroflexi	s__unclassified_p__Chloroflexi	OTU1472	4	5	3	4	5	6	8	13	6	2	0	1	57
d__Bacteria	k__norank_d__Bacteria	p__Bacteroidetes	c__Sphingobacteriia	o__Sphingobacteriales	f__Chitinophagaceae	g__Cnuella	s__uncultured_bacterium_g__Cnuella	OTU931	2	0	0	0	2	0	2	0	0	1	3	2	12
d__Bacteria	k__norank_d__Bacteria	p__Proteobacteria	c__Betaproteobacteria	o__Nitrosomonadales	f__Nitrosomonadaceae	g__norank_f__Nitrosomonadaceae	s__unclassified_g__norank_f__Nitrosomonadaceae	OTU1458	0	0	1	0	0	1	0	1	0	2	0	0	5
d__Bacteria	k__norank_d__Bacteria	p__Actinobacteria	c__Actinobacteria	o__norank_c__Actinobacteria	f__norank_c__Actinobacteria	g__norank_c__Actinobacteria	s__unclassified_g__norank_c__Actinobacteria	OTU2684	31	1	5	30	24	2	34	53	21	5	0	1	207
d__Bacteria	k__norank_d__Bacteria	p__Proteobacteria	c__Deltaproteobacteria	o__Myxococcales	f__Haliangiaceae	g__Haliangium	s__uncultured_bacterium_g__Haliangium	OTU1332	12	4	5	6	1	5	21	9	4	0	0	1	68
d__Bacteria	k__norank_d__Bacteria	p__Planctomycetes	c__Phycisphaerae	o__Tepidisphaerales	f__Tepidisphaeraceae	g__norank_f__Tepidisphaeraceae	s__uncultured_Planctomycetales_bacterium_g__norank_f__Tepidisphaeraceae	OTU1094	17	20	12	63	18	4	10	13	10	0	0	0	167
d__Bacteria	k__norank_d__Bacteria	p__Actinobacteria	c__Actinobacteria	o__Streptosporangiales	f__Thermomonosporaceae	g__Actinomadura	s__Actinomadura_flavalba_DSM_45200	OTU803	1	0	0	0	0	0	5	4	0	2	42	3	57
d__Bacteria	k__norank_d__Bacteria	p__Chloroflexi	c__Chloroflexia	o__Chloroflexales	f__Roseiflexaceae	g__Roseiflexus	s__uncultured_bacterium_g__Roseiflexus	OTU1021	1	0	0	0	0	1	1	1	3	0	0	0	7
d__Bacteria	k__norank_d__Bacteria	p__Firmicutes	c__Clostridia	o__Clostridiales	f__Peptococcaceae	g__Desulfitibacter	s__unclassified_g__Desulfitibacter	OTU1794	0	0	0	0	0	0	2	3	2	0	0	0	7
d__Bacteria	k__norank_d__Bacteria	p__Planctomycetes	c__Planctomycetacia	o__Planctomycetales	f__Planctomycetaceae	g__norank_f__Planctomycetaceae	s__unclassified_g__norank_f__Planctomycetaceae	OTU1173	1	0	1	6	1	0	4	6	3	0	0	0	22
d__Bacteria	k__norank_d__Bacteria	p__Actinobacteria	c__Actinobacteria	o__Propionibacteriales	f__Nocardioidaceae	g__unclassified_f__Nocardioidaceae	s__unclassified_f__Nocardioidaceae	OTU1862	4	4	0	15	9	22	7	6	1	0	0	0	68
d__Bacteria	k__norank_d__Bacteria	p__Actinobacteria	c__Actinobacteria	o__Gaiellales	f__unclassified_o__Gaiellales	g__unclassified_o__Gaiellales	s__unclassified_o__Gaiellales	OTU2439	43	2	28	33	29	43	121	62	91	4	3	0	459
d__Bacteria	k__norank_d__Bacteria	p__Proteobacteria	c__Deltaproteobacteria	o__Bdellovibrionales	f__Bdellovibrionaceae	g__Bdellovibrio	s__unclassified_g__Bdellovibrio	OTU1631	0	0	0	1	0	0	4	5	0	0	0	0	10
d__Bacteria	k__norank_d__Bacteria	p__Proteobacteria	c__Gammaproteobacteria	o__Legionellales	f__Coxiellaceae	g__Coxiella	s__unclassified_g__Coxiella	OTU1733	1	0	0	0	1	0	1	0	0	0	0	0	3
d__Bacteria	k__norank_d__Bacteria	p__Planctomycetes	c__Phycisphaerae	o__Tepidisphaerales	f__Tepidisphaeraceae	g__norank_f__Tepidisphaeraceae	s__uncultured_bacterium_g__norank_f__Tepidisphaeraceae	OTU2106	2	0	0	7	4	0	2	0	3	1	1	0	20
d__Bacteria	k__norank_d__Bacteria	p__Cyanobacteria	c__Cyanobacteria	o__SubsectionIII	f__FamilyI_o__SubsectionIII	g__Leptolyngbya	s__Leptolyngbya_sp._UIC_10125	OTU1353	1	0	2	0	1	0	0	5	1	0	0	0	10
d__Bacteria	k__norank_d__Bacteria	p__Proteobacteria	c__Betaproteobacteria	o__SC-I-84	f__norank_o__SC-I-84	g__norank_o__SC-I-84	s__unclassified_g__norank_o__SC-I-84	OTU664	0	2	0	3	1	7	0	0	0	7	2	9	31
d__Bacteria	k__norank_d__Bacteria	p__Proteobacteria	c__Deltaproteobacteria	o__Myxococcales	f__Myxococcaceae	g__Myxococcus	s__unclassified_g__Myxococcus	OTU722	54	8	11	27	17	24	26	28	14	9	1	9	228
d__Bacteria	k__norank_d__Bacteria	p__Nitrospirae	c__Nitrospira	o__norank_c__Nitrospira	f__norank_c__Nitrospira	g__Nitrospira	s__unclassified_g__Nitrospira	OTU1371	1	0	0	1	1	0	0	2	1	1	0	0	7
d__Bacteria	k__norank_d__Bacteria	p__Chloroflexi	c__TK10	o__norank_c__TK10	f__norank_c__TK10	g__norank_c__TK10	s__uncultured_bacterium_g__norank_c__TK10	OTU2442	16	3	2	12	18	10	31	44	9	0	0	0	145
d__Bacteria	k__norank_d__Bacteria	p__Gemmatimonadetes	c__Gemmatimonadetes	o__Longimicrobiales	f__Longimicrobiaceae	g__norank_f__Longimicrobiaceae	s__uncultured_soil_bacterium_g__norank_f__Longimicrobiaceae	OTU2341	2	1	0	4	1	6	1	3	0	4	4	3	29
d__Bacteria	k__norank_d__Bacteria	p__Verrucomicrobia	c__OPB35_soil_group	o__norank_c__OPB35_soil_group	f__norank_c__OPB35_soil_group	g__norank_c__OPB35_soil_group	s__uncultured_bacterium_g__norank_c__OPB35_soil_group	OTU2018	3	1	2	8	2	0	4	2	2	0	0	0	24
d__Bacteria	k__norank_d__Bacteria	p__Firmicutes	c__Clostridia	o__Clostridiales	f__Ruminococcaceae	g__Ruminococcus_2	s__uncultured_bacterium_g__Ruminococcus_2	OTU282	4	0	0	2	0	4	0	0	0	0	0	0	10
d__Bacteria	k__norank_d__Bacteria	p__Chloroflexi	c__Chloroflexia	o__Chloroflexales	f__Chloroflexaceae	g__Chloronema	s__unclassified_g__Chloronema	OTU2086	2	2	0	1	2	0	2	0	0	0	0	0	9
d__Bacteria	k__norank_d__Bacteria	p__Planctomycetes	c__Phycisphaerae	o__Tepidisphaerales	f__Tepidisphaeraceae	g__norank_f__Tepidisphaeraceae	s__unclassified_g__norank_f__Tepidisphaeraceae	OTU1502	5	3	0	4	1	0	4	1	0	0	0	0	18
d__Bacteria	k__norank_d__Bacteria	p__Proteobacteria	c__Gammaproteobacteria	o__Legionellales	f__Legionellaceae	g__Legionella	s__unclassified_g__Legionella	OTU2633	0	0	0	0	0	0	5	1	1	0	0	0	7
d__Bacteria	k__norank_d__Bacteria	p__Verrucomicrobia	c__Verrucomicrobiae	o__Verrucomicrobiales	f__Verrucomicrobiaceae	g__norank_f__Verrucomicrobiaceae	s__unclassified_g__norank_f__Verrucomicrobiaceae	OTU490	2	2	0	4	8	0	0	1	0	0	0	0	17
d__Bacteria	k__norank_d__Bacteria	p__Proteobacteria	c__Betaproteobacteria	o__SC-I-84	f__norank_o__SC-I-84	g__norank_o__SC-I-84	s__uncultured_bacterium_g__norank_o__SC-I-84	OTU910	19	6	11	11	11	20	9	19	9	15	2	11	143
d__Bacteria	k__norank_d__Bacteria	p__Planctomycetes	c__Planctomycetacia	o__Planctomycetales	f__Planctomycetaceae	g__norank_f__Planctomycetaceae	s__uncultured_sludge_bacterium_A40	OTU3297	1	1	1	0	2	0	0	0	0	0	0	2	7
d__Bacteria	k__norank_d__Bacteria	p__Proteobacteria	c__Alphaproteobacteria	o__Rhodospirillales	f__Rhodospirillaceae	g__norank_f__Rhodospirillaceae	s__uncultured_Rhodospirillaceae_bacterium_g__norank_f__Rhodospirillaceae	OTU2924	0	0	1	3	4	1	0	1	0	0	0	1	11
d__Bacteria	k__norank_d__Bacteria	p__Actinobacteria	c__Actinobacteria	o__norank_c__Actinobacteria	f__norank_c__Actinobacteria	g__norank_c__Actinobacteria	s__unclassified_g__norank_c__Actinobacteria	OTU1489	30	2	7	12	12	0	23	2	12	0	1	1	102
d__Bacteria	k__norank_d__Bacteria	p__Proteobacteria	c__Alphaproteobacteria	o__Rhodospirillales	f__Acetobacteraceae	g__Roseomonas	s__unclassified_g__Roseomonas	OTU1435	1	6	0	5	5	1	1	2	0	6	4	4	35
d__Bacteria	k__norank_d__Bacteria	p__Latescibacteria	c__norank_p__Latescibacteria	o__norank_p__Latescibacteria	f__norank_p__Latescibacteria	g__norank_p__Latescibacteria	s__uncultured_Acidobacteria_bacterium_g__norank_p__Latescibacteria	OTU1567	10	5	3	18	4	0	3	5	3	0	0	0	51
d__Bacteria	k__norank_d__Bacteria	p__unclassified_k__norank_d__Bacteria	c__unclassified_k__norank_d__Bacteria	o__unclassified_k__norank_d__Bacteria	f__unclassified_k__norank_d__Bacteria	g__unclassified_k__norank_d__Bacteria	s__unclassified_k__norank_d__Bacteria	OTU1069	11	5	13	2	1	0	0	2	3	0	0	0	37
d__Bacteria	k__norank_d__Bacteria	p__Proteobacteria	c__Alphaproteobacteria	o__Rhodospirillales	f__Acetobacteraceae	g__Roseomonas	s__unclassified_g__Roseomonas	OTU1236	1	2	1	4	5	4	2	1	0	0	1	0	21
d__Bacteria	k__norank_d__Bacteria	p__Actinobacteria	c__Actinobacteria	o__Micrococcales	f__Promicromonosporaceae	g__Cellulosimicrobium	s__unclassified_g__Cellulosimicrobium	OTU1083	35	22	3	66	32	27	47	22	63	18	52	40	427
d__Bacteria	k__norank_d__Bacteria	p__Proteobacteria	c__Gammaproteobacteria	o__Xanthomonadales	f__Xanthomonadaceae	g__unclassified_f__Xanthomonadaceae	s__unclassified_f__Xanthomonadaceae	OTU3304	0	0	0	4	19	6	0	0	0	0	0	0	29
d__Bacteria	k__norank_d__Bacteria	p__Planctomycetes	c__Planctomycetacia	o__Planctomycetales	f__Planctomycetaceae	g__Zavarzinella	s__unclassified_g__Zavarzinella	OTU2843	26	13	12	18	14	1	25	28	23	0	0	0	160
d__Bacteria	k__norank_d__Bacteria	p__Actinobacteria	c__Actinobacteria	o__norank_c__Actinobacteria	f__norank_c__Actinobacteria	g__norank_c__Actinobacteria	s__unclassified_g__norank_c__Actinobacteria	OTU2045	9	0	8	1	3	1	4	4	3	25	3	19	80
d__Bacteria	k__norank_d__Bacteria	p__Proteobacteria	c__Gammaproteobacteria	o__Xanthomonadales	f__norank_o__Xanthomonadales	g__norank_o__Xanthomonadales	s__bacterium_endosymbiont_of_Onthophagus_Taurus_g__norank_o__Xanthomonadales	OTU2038	5	4	3	2	1	1	3	0	1	0	2	1	23
d__Bacteria	k__norank_d__Bacteria	p__Bacteroidetes	c__Sphingobacteriia	o__Sphingobacteriales	f__Chitinophagaceae	g__norank_f__Chitinophagaceae	s__unclassified_g__norank_f__Chitinophagaceae	OTU2599	1	0	0	0	0	0	3	1	5	0	0	0	10
d__Bacteria	k__norank_d__Bacteria	p__Chloroflexi	c__Ardenticatenia	o__Ardenticatenales	f__norank_o__Ardenticatenales	g__norank_o__Ardenticatenales	s__uncultured_bacterium_g__norank_o__Ardenticatenales	OTU141	1	0	0	1	4	0	2	0	0	0	0	0	8
d__Bacteria	k__norank_d__Bacteria	p__Planctomycetes	c__Planctomycetacia	o__Planctomycetales	f__Planctomycetaceae	g__norank_f__Planctomycetaceae	s__unclassified_g__norank_f__Planctomycetaceae	OTU1290	2	0	0	2	0	0	2	1	1	0	0	0	8
d__Bacteria	k__norank_d__Bacteria	p__Actinobacteria	c__Actinobacteria	o__Pseudonocardiales	f__Pseudonocardiaceae	g__Pseudonocardia	s__unclassified_g__Pseudonocardia	OTU3116	0	0	0	2	0	0	0	0	0	0	0	0	2
d__Bacteria	k__norank_d__Bacteria	p__Actinobacteria	c__Actinobacteria	o__Solirubrobacterales	f__Elev-16S-1332	g__norank_f__Elev-16S-1332	s__uncultured_bacterium_g__norank_f__Elev-16S-1332	OTU2218	47	37	29	76	78	74	125	58	46	124	41	60	795
d__Bacteria	k__norank_d__Bacteria	p__Acidobacteria	c__Acidobacteria	o__norank_c__Acidobacteria	f__norank_c__Acidobacteria	g__norank_c__Acidobacteria	s__unclassified_g__norank_c__Acidobacteria	OTU455	5	5	0	7	2	1	1	0	1	1	1	1	25
d__Bacteria	k__norank_d__Bacteria	p__Actinobacteria	c__Actinobacteria	o__Solirubrobacterales	f__0319-6M6	g__norank_f__0319-6M6	s__uncultured_bacterium_g__norank_f__0319-6M6	OTU2198	247	151	120	268	263	222	355	180	206	29	20	22	2083
d__Bacteria	k__norank_d__Bacteria	p__Proteobacteria	c__Alphaproteobacteria	o__Rhizobiales	f__JG34-KF-361	g__norank_f__JG34-KF-361	s__uncultured_endolithic_bacterium_g__norank_f__JG34-KF-361	OTU2242	102	73	52	135	100	136	275	149	125	439	174	186	1946
d__Bacteria	k__norank_d__Bacteria	p__Actinobacteria	c__Actinobacteria	o__unclassified_c__Actinobacteria	f__unclassified_c__Actinobacteria	g__unclassified_c__Actinobacteria	s__unclassified_c__Actinobacteria	OTU2001	4	0	1	1	0	1	1	0	3	1	0	2	14
d__Bacteria	k__norank_d__Bacteria	p__Actinobacteria	c__Actinobacteria	o__unclassified_c__Actinobacteria	f__unclassified_c__Actinobacteria	g__unclassified_c__Actinobacteria	s__unclassified_c__Actinobacteria	OTU1757	6	2	0	7	6	4	14	3	5	51	4	0	102
d__Bacteria	k__norank_d__Bacteria	p__Actinobacteria	c__Actinobacteria	o__unclassified_c__Actinobacteria	f__unclassified_c__Actinobacteria	g__unclassified_c__Actinobacteria	s__unclassified_c__Actinobacteria	OTU1756	0	0	0	0	0	0	12	4	2	3	0	0	21
d__Bacteria	k__norank_d__Bacteria	p__Proteobacteria	c__Alphaproteobacteria	o__Rhodobacterales	f__Rhodobacteraceae	g__unclassified_f__Rhodobacteraceae	s__unclassified_f__Rhodobacteraceae	OTU824	1	0	1	0	0	3	0	1	0	10	6	6	28
d__Bacteria	k__norank_d__Bacteria	p__Actinobacteria	c__Actinobacteria	o__Acidimicrobiales	f__OM1_clade	g__norank_f__OM1_clade	s__unclassified_g__norank_f__OM1_clade	OTU914	4	1	0	2	0	1	0	0	0	50	24	38	120
d__Bacteria	k__norank_d__Bacteria	p__Actinobacteria	c__Actinobacteria	o__Acidimicrobiales	f__norank_o__Acidimicrobiales	g__norank_o__Acidimicrobiales	s__unclassified_g__norank_o__Acidimicrobiales	OTU662	0	0	3	0	1	1	1	2	2	21	4	7	42
d__Bacteria	k__norank_d__Bacteria	p__Actinobacteria	c__Actinobacteria	o__Propionibacteriales	f__Nocardioidaceae	g__Nocardioides	s__unclassified_g__Nocardioides	OTU277	2	2	2	4	6	17	6	3	1	1	0	1	45
d__Bacteria	k__norank_d__Bacteria	p__Actinobacteria	c__Actinobacteria	o__Micromonosporales	f__Micromonosporaceae	g__Actinoplanes	s__Actinoplanes_regularis	OTU356	6	3	1	11	9	19	4	2	3	2	0	11	71
d__Bacteria	k__norank_d__Bacteria	p__Actinobacteria	c__Actinobacteria	o__Propionibacteriales	f__Nocardioidaceae	g__Aeromicrobium	s__uncultured_bacterium_g__Aeromicrobium	OTU1350	38	27	48	147	96	65	65	66	98	217	88	145	1100
d__Bacteria	k__norank_d__Bacteria	p__Actinobacteria	c__Actinobacteria	o__Rubrobacterales	f__Rubrobacteriaceae	g__Rubrobacter	s__unclassified_g__Rubrobacter	OTU2324	77	23	38	82	49	93	182	92	117	146	38	85	1022
d__Bacteria	k__norank_d__Bacteria	p__Proteobacteria	c__Betaproteobacteria	o__Nitrosomonadales	f__Nitrosomonadaceae	g__norank_f__Nitrosomonadaceae	s__unclassified_g__norank_f__Nitrosomonadaceae	OTU2225	36	8	14	3	11	4	36	18	16	0	0	0	146
d__Bacteria	k__norank_d__Bacteria	p__Gemmatimonadetes	c__Gemmatimonadetes	o__Gemmatimonadales	f__Gemmatimonadaceae	g__norank_f__Gemmatimonadaceae	s__uncultured_bacterium_g__norank_f__Gemmatimonadaceae	OTU171	1	0	1	1	0	0	6	2	2	0	0	0	13
d__Bacteria	k__norank_d__Bacteria	p__Cyanobacteria	c__Cyanobacteria	o__SubsectionIII	f__FamilyI_o__SubsectionIII	g__unclassified_f__FamilyI_o__SubsectionIII	s__unclassified_f__FamilyI_o__SubsectionIII	OTU57	0	0	6	0	0	0	1	0	0	0	0	0	7
d__Bacteria	k__norank_d__Bacteria	p__Chloroflexi	c__Anaerolineae	o__Anaerolineales	f__Anaerolineaceae	g__norank_f__Anaerolineaceae	s__uncultured_Gemmatimonadetes_bacterium_g__norank_f__Anaerolineaceae	OTU965	1	3	0	0	2	0	4	0	2	0	0	0	12
d__Bacteria	k__norank_d__Bacteria	p__Proteobacteria	c__Alphaproteobacteria	o__Rhodospirillales	f__Acetobacteraceae	g__unclassified_f__Acetobacteraceae	s__unclassified_f__Acetobacteraceae	OTU1812	0	0	1	0	0	0	3	0	1	9	0	0	14
d__Bacteria	k__norank_d__Bacteria	p__Actinobacteria	c__Actinobacteria	o__norank_c__Actinobacteria	f__norank_c__Actinobacteria	g__norank_c__Actinobacteria	s__uncultured_bacterium_0425-2M17	OTU2138	1	0	0	2	1	0	1	1	0	0	0	0	6
d__Bacteria	k__norank_d__Bacteria	p__Proteobacteria	c__Alphaproteobacteria	o__Rhodobacterales	f__Rhodobacteraceae	g__Rubellimicrobium	s__uncultured_bacterium_g__Rubellimicrobium	OTU752	0	0	1	0	0	0	0	0	0	7	5	5	18
d__Bacteria	k__norank_d__Bacteria	p__unclassified_k__norank_d__Bacteria	c__unclassified_k__norank_d__Bacteria	o__unclassified_k__norank_d__Bacteria	f__unclassified_k__norank_d__Bacteria	g__unclassified_k__norank_d__Bacteria	s__unclassified_k__norank_d__Bacteria	OTU2477	3	0	3	1	1	0	5	1	1	0	0	0	15
d__Bacteria	k__norank_d__Bacteria	p__Proteobacteria	c__Deltaproteobacteria	o__Myxococcales	f__mle1-27	g__norank_f__mle1-27	s__unclassified_g__norank_f__mle1-27	OTU2715	3	0	6	3	0	3	8	2	1	0	0	1	27
d__Bacteria	k__norank_d__Bacteria	p__Chloroflexi	c__unclassified_p__Chloroflexi	o__unclassified_p__Chloroflexi	f__unclassified_p__Chloroflexi	g__unclassified_p__Chloroflexi	s__unclassified_p__Chloroflexi	OTU1228	1	1	0	2	1	0	0	3	3	0	0	1	12
d__Bacteria	k__norank_d__Bacteria	p__Acidobacteria	c__Acidobacteria	o__Blastocatellales	f__Blastocatellaceae__Subgroup_4_	g__DS-100	s__unclassified_g__DS-100	OTU1326	7	9	8	23	6	3	11	7	4	1	0	0	79
d__Bacteria	k__norank_d__Bacteria	p__Proteobacteria	c__Betaproteobacteria	o__unclassified_c__Betaproteobacteria	f__unclassified_c__Betaproteobacteria	g__unclassified_c__Betaproteobacteria	s__unclassified_c__Betaproteobacteria	OTU1785	7	2	2	1	3	3	8	6	4	0	0	0	36
d__Bacteria	k__norank_d__Bacteria	p__Proteobacteria	c__Alphaproteobacteria	o__Rhodospirillales	f__Rhodospirillales_Incertae_Sedis	g__Candidatus_Alysiosphaera	s__unclassified_g__Candidatus_Alysiosphaera	OTU1175	3	3	0	4	6	1	10	0	3	4	0	0	34
d__Bacteria	k__norank_d__Bacteria	p__Planctomycetes	c__Planctomycetacia	o__Planctomycetales	f__Planctomycetaceae	g__unclassified_f__Planctomycetaceae	s__unclassified_f__Planctomycetaceae	OTU94	1	1	1	0	0	0	1	1	1	1	0	1	8
d__Bacteria	k__norank_d__Bacteria	p__Gemmatimonadetes	c__Gemmatimonadetes	o__Gemmatimonadales	f__Gemmatimonadaceae	g__norank_f__Gemmatimonadaceae	s__uncultured_Gemmatimonas_sp._g__norank	OTU1317	3	4	3	4	4	7	8	6	3	0	0	0	42
d__Bacteria	k__norank_d__Bacteria	p__Chloroflexi	c__Ardenticatenia	o__norank_c__Ardenticatenia	f__norank_c__Ardenticatenia	g__norank_c__Ardenticatenia	s__uncultured_bacterium_g__norank_c__Ardenticatenia	OTU233	1	0	1	1	1	1	1	0	0	0	0	0	6
d__Bacteria	k__norank_d__Bacteria	p__Gemmatimonadetes	c__Gemmatimonadetes	o__norank_c__Gemmatimonadetes	f__norank_c__Gemmatimonadetes	g__norank_c__Gemmatimonadetes	s__uncultured_Gemmatimonadales_bacterium_g__norank_c__Gemmatimonadetes	OTU2512	1	1	2	6	3	0	15	3	3	0	3	0	37
d__Bacteria	k__norank_d__Bacteria	p__Proteobacteria	c__Deltaproteobacteria	o__Myxococcales	f__Vulgatibacteraceae	g__Vulgatibacter	s__unclassified_g__Vulgatibacter	OTU364	0	2	0	2	2	0	0	0	0	0	0	0	6
d__Bacteria	k__norank_d__Bacteria	p__Proteobacteria	c__Deltaproteobacteria	o__Oligoflexales	f__0319-6G20	g__norank_f__0319-6G20	s__uncultured_bacterium_g__norank_f__0319-6G20	OTU2942	0	0	0	1	0	1	0	0	0	0	0	0	2
d__Bacteria	k__norank_d__Bacteria	p__Nitrospirae	c__Nitrospira	o__norank_c__Nitrospira	f__norank_c__Nitrospira	g__Nitrospira	s__unclassified_g__Nitrospira	OTU1418	0	1	0	1	0	0	1	3	3	0	0	0	9
d__Bacteria	k__norank_d__Bacteria	p__Chloroflexi	c__Anaerolineae	o__Anaerolineales	f__Anaerolineaceae	g__norank_f__Anaerolineaceae	s__unclassified_g__norank_f__Anaerolineaceae	OTU1996	4	0	0	5	2	0	4	7	5	1	0	0	28
d__Bacteria	k__norank_d__Bacteria	p__Actinobacteria	c__Actinobacteria	o__Acidimicrobiales	f__norank_o__Acidimicrobiales	g__norank_o__Acidimicrobiales	s__unclassified_g__norank_o__Acidimicrobiales	OTU3039	5	9	7	17	15	22	28	12	8	15	4	3	145
d__Bacteria	k__norank_d__Bacteria	p__Actinobacteria	c__Actinobacteria	o__Acidimicrobiales	f__norank_o__Acidimicrobiales	g__norank_o__Acidimicrobiales	s__unclassified_g__norank_o__Acidimicrobiales	OTU258	10	3	5	10	8	11	15	8	7	4	5	3	89
d__Bacteria	k__norank_d__Bacteria	p__Planctomycetes	c__Planctomycetacia	o__Planctomycetales	f__Planctomycetaceae	g__unclassified_f__Planctomycetaceae	s__unclassified_f__Planctomycetaceae	OTU2533	1	2	0	5	2	0	1	0	1	0	1	0	13
d__Bacteria	k__norank_d__Bacteria	p__Proteobacteria	c__Betaproteobacteria	o__B1-7BS	f__norank_o__B1-7BS	g__norank_o__B1-7BS	s__uncultured_bacterium_g__norank_o__B1-7BS	OTU1342	12	75	13	86	101	100	1	7	0	4	6	2	407
d__Bacteria	k__norank_d__Bacteria	p__Chlamydiae	c__Chlamydiae	o__Chlamydiales	f__unclassified_o__Chlamydiales	g__unclassified_o__Chlamydiales	s__unclassified_o__Chlamydiales	OTU1765	1	0	0	0	0	0	1	0	0	2	0	2	6
d__Bacteria	k__norank_d__Bacteria	p__Gemmatimonadetes	c__Gemmatimonadetes	o__norank_c__Gemmatimonadetes	f__norank_c__Gemmatimonadetes	g__norank_c__Gemmatimonadetes	s__uncultured_bacterium_g__norank_c__Gemmatimonadetes	OTU1723	7	1	0	6	9	7	2	7	7	0	0	0	46
d__Bacteria	k__norank_d__Bacteria	p__Proteobacteria	c__Betaproteobacteria	o__Burkholderiales	f__Comamonadaceae	g__unclassified_f__Comamonadaceae	s__unclassified_f__Comamonadaceae	OTU1741	3	3	2	1	0	0	8	0	0	0	0	0	17
d__Bacteria	k__norank_d__Bacteria	p__Armatimonadetes	c__norank_p__Armatimonadetes	o__norank_p__Armatimonadetes	f__norank_p__Armatimonadetes	g__norank_p__Armatimonadetes	s__unclassified_g__norank_p__Armatimonadetes	OTU1176	1	5	5	2	1	4	2	3	5	0	0	1	29
d__Bacteria	k__norank_d__Bacteria	p__Actinobacteria	c__Actinobacteria	o__norank_c__Actinobacteria	f__norank_c__Actinobacteria	g__norank_c__Actinobacteria	s__uncultured_bacterium_0425-2M17	OTU1025	3	0	1	1	0	0	4	2	1	1	0	0	13
d__Bacteria	k__norank_d__Bacteria	p__Gemmatimonadetes	c__Gemmatimonadetes	o__Longimicrobiales	f__Longimicrobiaceae	g__norank_f__Longimicrobiaceae	s__unclassified_g__norank_f__Longimicrobiaceae	OTU3230	0	2	1	2	4	5	0	0	0	5	1	2	22
d__Bacteria	k__norank_d__Bacteria	p__Proteobacteria	c__Alphaproteobacteria	o__Rhodospirillales	f__KCM-B-15	g__norank_f__KCM-B-15	s__uncultured_bacterium_g__norank_f__KCM-B-15	OTU1374	4	1	0	27	4	12	3	7	3	3	1	0	65
d__Bacteria	k__norank_d__Bacteria	p__Gemmatimonadetes	c__Gemmatimonadetes	o__Gemmatimonadales	f__Gemmatimonadaceae	g__unclassified_f__Gemmatimonadaceae	s__unclassified_f__Gemmatimonadaceae	OTU1439	0	0	0	0	0	1	1	1	0	1	0	1	5
d__Bacteria	k__norank_d__Bacteria	p__Proteobacteria	c__Deltaproteobacteria	o__Myxococcales	f__Myxococcaceae	g__norank_f__Myxococcaceae	s__uncultured_bacterium_g__norank_f__Myxococcaceae	OTU942	27	0	18	58	38	60	50	25	15	7	3	14	315
d__Bacteria	k__norank_d__Bacteria	p__Planctomycetes	c__Planctomycetacia	o__Planctomycetales	f__Planctomycetaceae	g__Planctomyces	s__unclassified_g__Planctomyces	OTU3301	8	6	3	9	9	1	5	4	4	3	1	1	54
d__Bacteria	k__norank_d__Bacteria	p__Armatimonadetes	c__norank_p__Armatimonadetes	o__norank_p__Armatimonadetes	f__norank_p__Armatimonadetes	g__norank_p__Armatimonadetes	s__uncultured_Chloroflexi_bacterium_g__norank_p__Armatimonadetes	OTU1333	8	5	6	11	17	4	4	7	2	2	1	2	69
d__Bacteria	k__norank_d__Bacteria	p__Chloroflexi	c__JG30-KF-CM66	o__norank_c__JG30-KF-CM66	f__norank_c__JG30-KF-CM66	g__norank_c__JG30-KF-CM66	s__uncultured_Chloroflexi_bacterium_g__norank_c__JG30-KF-CM66	OTU2488	14	8	3	15	10	6	14	15	6	8	2	3	104
d__Bacteria	k__norank_d__Bacteria	p__Chloroflexi	c__Anaerolineae	o__Anaerolineales	f__Anaerolineaceae	g__norank_f__Anaerolineaceae	s__unclassified_g__norank_f__Anaerolineaceae	OTU8	1	3	2	4	0	0	2	0	0	0	0	0	12
d__Bacteria	k__norank_d__Bacteria	p__Planctomycetes	c__Planctomycetacia	o__Planctomycetales	f__Planctomycetaceae	g__Pir4_lineage	s__uncultured_bacterium_g__Pir4_lineage	OTU661	1	1	1	3	2	0	0	1	0	15	4	2	30
d__Bacteria	k__norank_d__Bacteria	p__Actinobacteria	c__Actinobacteria	o__Pseudonocardiales	f__Pseudonocardiaceae	g__Saccharomonospora	s__Saccharomonospora_azurea	OTU389	2	2	1	6	1	5	3	3	2	0	0	0	25
d__Bacteria	k__norank_d__Bacteria	p__Actinobacteria	c__Actinobacteria	o__Solirubrobacterales	f__FFCH13075	g__norank_f__FFCH13075	s__uncultured_bacterium_g__norank_f__FFCH13075	OTU1855	15	8	16	20	8	7	46	14	10	4	1	5	154
d__Bacteria	k__norank_d__Bacteria	p__Actinobacteria	c__Actinobacteria	o__Gaiellales	f__Gaiellaceae	g__Gaiella	s__unclassified_g__Gaiella	OTU1233	18	10	19	28	25	36	50	47	38	9	4	6	290
d__Bacteria	k__norank_d__Bacteria	p__Proteobacteria	c__Betaproteobacteria	o__Burkholderiales	f__Oxalobacteraceae	g__unclassified_f__Oxalobacteraceae	s__unclassified_f__Oxalobacteraceae	OTU896	26	19	18	34	35	44	27	14	12	79	47	33	388
d__Bacteria	k__norank_d__Bacteria	p__Proteobacteria	c__Alphaproteobacteria	o__Rhizobiales	f__Xanthobacteraceae	g__unclassified_f__Xanthobacteraceae	s__unclassified_f__Xanthobacteraceae	OTU884	23	21	14	18	19	23	46	33	27	24	21	32	301
d__Bacteria	k__norank_d__Bacteria	p__Actinobacteria	c__Actinobacteria	o__Frankiales	f__Cryptosporangiaceae	g__Cryptosporangium	s__Cryptosporangium_japonicum	OTU2832	0	1	2	8	4	2	5	4	4	4	4	1	39
d__Bacteria	k__norank_d__Bacteria	p__Bacteroidetes	c__Sphingobacteriia	o__Sphingobacteriales	f__Chitinophagaceae	g__unclassified_f__Chitinophagaceae	s__unclassified_f__Chitinophagaceae	OTU2948	9	5	10	4	7	4	9	0	1	1	2	1	53
d__Bacteria	k__norank_d__Bacteria	p__Nitrospirae	c__Nitrospira	o__norank_c__Nitrospira	f__norank_c__Nitrospira	g__Nitrospira	s__uncultured_candidate_division_SPAM_bacterium	OTU1801	19	26	5	18	13	17	7	16	18	4	2	5	150
d__Bacteria	k__norank_d__Bacteria	p__Actinobacteria	c__Actinobacteria	o__Euzebyales	f__Euzebyaceae	g__norank_f__Euzebyaceae	s__uncultured_Actinomycetales_bacterium_g__norank_f__Euzebyaceae	OTU673	0	0	0	2	0	1	1	8	0	10	2	7	31
d__Bacteria	k__norank_d__Bacteria	p__Actinobacteria	c__Actinobacteria	o__Gaiellales	f__unclassified_o__Gaiellales	g__unclassified_o__Gaiellales	s__unclassified_o__Gaiellales	OTU913	0	2	0	4	0	2	4	1	2	6	5	6	32
d__Bacteria	k__norank_d__Bacteria	p__Proteobacteria	c__Gammaproteobacteria	o__Xanthomonadales	f__Xanthomonadaceae	g__Arenimonas	s__unclassified_g__Arenimonas	OTU2828	12	10	12	15	17	18	24	13	4	0	0	0	125
d__Bacteria	k__norank_d__Bacteria	p__Cyanobacteria	c__Cyanobacteria	o__SubsectionIII	f__FamilyI_o__SubsectionIII	g__unclassified_f__FamilyI_o__SubsectionIII	s__unclassified_f__FamilyI_o__SubsectionIII	OTU166	9	0	2	1	2	1	3	6	0	0	0	0	24
d__Bacteria	k__norank_d__Bacteria	p__Firmicutes	c__Bacilli	o__Bacillales	f__Paenibacillaceae	g__unclassified_f__Paenibacillaceae	s__unclassified_f__Paenibacillaceae	OTU478	2	1	0	5	1	3	1	0	0	0	0	0	13
d__Bacteria	k__norank_d__Bacteria	p__Actinobacteria	c__Actinobacteria	o__Solirubrobacterales	f__288-2	g__norank_f__288-2	s__uncultured_bacterium_g__norank_f__288-2	OTU2164	420	288	294	613	491	446	864	401	526	201	101	143	4788
d__Bacteria	k__norank_d__Bacteria	p__Actinobacteria	c__Actinobacteria	o__Micrococcales	f__Microbacteriaceae	g__Microbacterium	s__unclassified_g__Microbacterium	OTU1211	13	11	31	42	37	32	7	11	17	227	172	240	840
d__Bacteria	k__norank_d__Bacteria	p__Actinobacteria	c__Actinobacteria	o__unclassified_c__Actinobacteria	f__unclassified_c__Actinobacteria	g__unclassified_c__Actinobacteria	s__unclassified_c__Actinobacteria	OTU2829	14	3	7	14	3	6	64	11	11	7	5	1	146
d__Bacteria	k__norank_d__Bacteria	p__Proteobacteria	c__Betaproteobacteria	o__Burkholderiales	f__Comamonadaceae	g__unclassified_f__Comamonadaceae	s__unclassified_f__Comamonadaceae	OTU1294	5	4	13	9	4	11	14	15	2	33	27	18	155
d__Bacteria	k__norank_d__Bacteria	p__Actinobacteria	c__Actinobacteria	o__Acidimicrobiales	f__unclassified_o__Acidimicrobiales	g__unclassified_o__Acidimicrobiales	s__unclassified_o__Acidimicrobiales	OTU62	3	0	1	1	1	1	14	2	5	0	0	1	29
d__Bacteria	k__norank_d__Bacteria	p__Bacteroidetes	c__Sphingobacteriia	o__Sphingobacteriales	f__norank_o__Sphingobacteriales	g__norank_o__Sphingobacteriales	s__uncultured_bacterium_g__norank_o__Sphingobacteriales	OTU1900	34	15	8	17	15	4	93	15	11	1	0	0	213
d__Bacteria	k__norank_d__Bacteria	p__Actinobacteria	c__Actinobacteria	o__Solirubrobacterales	f__Elev-16S-1332	g__norank_f__Elev-16S-1332	s__unclassified_g__norank_f__Elev-16S-1332	OTU938	0	1	1	35	2	1	0	4	2	76	59	55	236
d__Bacteria	k__norank_d__Bacteria	p__Actinobacteria	c__Actinobacteria	o__Solirubrobacterales	f__Elev-16S-1332	g__norank_f__Elev-16S-1332	s__unclassified_g__norank_f__Elev-16S-1332	OTU934	9	6	6	16	21	36	12	26	17	150	71	111	481
d__Bacteria	k__norank_d__Bacteria	p__Chloroflexi	c__Thermomicrobia	o__JG30-KF-CM45	f__norank_o__JG30-KF-CM45	g__norank_o__JG30-KF-CM45	s__unclassified_g__norank_o__JG30-KF-CM45	OTU2914	0	0	0	2	0	2	0	0	0	0	1	0	5
d__Bacteria	k__norank_d__Bacteria	p__Actinobacteria	c__Actinobacteria	o__Streptosporangiales	f__Streptosporangiaceae	g__Nonomuraea	s__unclassified_g__Nonomuraea	OTU2375	42	25	13	162	112	87	66	40	33	36	7	10	633
d__Bacteria	k__norank_d__Bacteria	p__Proteobacteria	c__Deltaproteobacteria	o__Myxococcales	f__unclassified_o__Myxococcales	g__unclassified_o__Myxococcales	s__unclassified_o__Myxococcales	OTU3232	2	0	0	7	19	6	5	8	1	3	1	2	54
d__Bacteria	k__norank_d__Bacteria	p__Proteobacteria	c__Gammaproteobacteria	o__Legionellales	f__Coxiellaceae	g__Aquicella	s__uncultured_Aquicella_sp.	OTU1501	4	6	1	9	4	7	2	2	1	0	0	0	36
d__Bacteria	k__norank_d__Bacteria	p__Planctomycetes	c__Phycisphaerae	o__Tepidisphaerales	f__Tepidisphaeraceae	g__norank_f__Tepidisphaeraceae	s__unclassified_g__norank_f__Tepidisphaeraceae	OTU339	2	2	0	1	0	0	2	0	0	0	0	0	7
d__Bacteria	k__norank_d__Bacteria	p__Proteobacteria	c__Deltaproteobacteria	o__Bdellovibrionales	f__Bdellovibrionaceae	g__OM27_clade	s__uncultured_bacterium_g__OM27_clade	OTU2267	0	0	0	1	1	1	2	1	0	0	0	0	6
d__Bacteria	k__norank_d__Bacteria	p__Planctomycetes	c__Pla4_lineage	o__norank_c__Pla4_lineage	f__norank_c__Pla4_lineage	g__norank_c__Pla4_lineage	s__unclassified_g__norank_c__Pla4_lineage	OTU2149	3	3	3	2	2	1	3	0	0	0	0	0	17
d__Bacteria	k__norank_d__Bacteria	p__Planctomycetes	c__Planctomycetacia	o__Planctomycetales	f__Planctomycetaceae	g__norank_f__Planctomycetaceae	s__unclassified_g__norank_f__Planctomycetaceae	OTU1207	4	1	0	7	1	0	3	2	2	0	0	0	20
d__Bacteria	k__norank_d__Bacteria	p__Planctomycetes	c__Planctomycetacia	o__Planctomycetales	f__Planctomycetaceae	g__unclassified_f__Planctomycetaceae	s__unclassified_f__Planctomycetaceae	OTU1048	2	3	2	30	9	0	3	6	5	11	2	1	74
d__Bacteria	k__norank_d__Bacteria	p__Proteobacteria	c__Alphaproteobacteria	o__Rhizobiales	f__unclassified_o__Rhizobiales	g__unclassified_o__Rhizobiales	s__unclassified_o__Rhizobiales	OTU3292	2	0	0	3	4	3	3	4	1	1	0	2	23
d__Bacteria	k__norank_d__Bacteria	p__Proteobacteria	c__Alphaproteobacteria	o__Rhodospirillales	f__unclassified_o__Rhodospirillales	g__unclassified_o__Rhodospirillales	s__unclassified_o__Rhodospirillales	OTU310	4	0	0	3	1	0	3	1	0	0	0	1	13
d__Bacteria	k__norank_d__Bacteria	p__Proteobacteria	c__Deltaproteobacteria	o__Myxococcales	f__Polyangiaceae	g__Sorangium	s__unclassified_g__Sorangium	OTU1692	0	0	1	0	1	0	2	0	0	0	0	0	4
d__Bacteria	k__norank_d__Bacteria	p__Bacteroidetes	c__Sphingobacteriia	o__Sphingobacteriales	f__env.OPS_17	g__norank_f__env.OPS_17	s__unclassified_g__norank_f__env.OPS_17	OTU948	0	0	0	0	2	0	1	0	1	0	0	0	4
d__Bacteria	k__norank_d__Bacteria	p__Firmicutes	c__Clostridia	o__Clostridiales	f__Lachnospiraceae	g__[Eubacterium]_hallii_group	s__uncultured_organism_g__[Eubacterium]_hallii_group	OTU216	2	0	0	0	0	0	0	0	0	0	0	0	2
d__Bacteria	k__norank_d__Bacteria	p__Gemmatimonadetes	c__Gemmatimonadetes	o__Gemmatimonadales	f__Gemmatimonadaceae	g__unclassified_f__Gemmatimonadaceae	s__unclassified_f__Gemmatimonadaceae	OTU2941	5	5	0	10	4	4	13	12	10	3	2	1	69
d__Bacteria	k__norank_d__Bacteria	p__Proteobacteria	c__Alphaproteobacteria	o__Rhodospirillales	f__Acetobacteraceae	g__Craurococcus	s__uncultured_bacterium_g__Craurococcus	OTU2395	0	0	2	3	1	2	2	3	0	4	3	2	22
d__Bacteria	k__norank_d__Bacteria	p__Proteobacteria	c__Gammaproteobacteria	o__Xanthomonadales	f__Xanthomonadaceae	g__Thermomonas	s__unclassified_g__Thermomonas	OTU3280	22	42	7	18	54	30	4	3	0	3	0	2	185
d__Bacteria	k__norank_d__Bacteria	p__Cyanobacteria	c__Cyanobacteria	o__SubsectionIII	f__FamilyI_o__SubsectionIII	g__Phormidium	s__Microcoleus_sp._PCC_7113	OTU2542	17	2	281	7	9	0	23	16	35	0	0	0	390
d__Bacteria	k__norank_d__Bacteria	p__Chloroflexi	c__Chloroflexia	o__Chloroflexales	f__Chloroflexaceae	g__unclassified_f__Chloroflexaceae	s__unclassified_f__Chloroflexaceae	OTU2878	0	1	0	3	2	3	0	0	0	1	0	1	11
d__Bacteria	k__norank_d__Bacteria	p__Planctomycetes	c__Planctomycetacia	o__Planctomycetales	f__Planctomycetaceae	g__Gemmata	s__uncultured_bacterium_g__Gemmata	OTU951	0	0	1	0	1	0	2	0	2	0	0	0	6
d__Bacteria	k__norank_d__Bacteria	p__Proteobacteria	c__Betaproteobacteria	o__Nitrosomonadales	f__Nitrosomonadaceae	g__norank_f__Nitrosomonadaceae	s__unclassified_g__norank_f__Nitrosomonadaceae	OTU2781	22	16	12	16	36	22	80	24	37	14	1	5	285
d__Bacteria	k__norank_d__Bacteria	p__Proteobacteria	c__Deltaproteobacteria	o__Myxococcales	f__unclassified_o__Myxococcales	g__unclassified_o__Myxococcales	s__unclassified_o__Myxococcales	OTU949	10	0	8	39	16	22	18	8	12	1	2	4	140
d__Bacteria	k__norank_d__Bacteria	p__Bacteroidetes	c__Sphingobacteriia	o__Sphingobacteriales	f__Chitinophagaceae	g__Parafilimonas	s__uncultured_soil_bacterium_g__Parafilimonas	OTU813	0	0	0	0	1	0	4	0	0	7	25	3	40
d__Bacteria	k__norank_d__Bacteria	p__Chloroflexi	c__Thermomicrobia	o__JG30-KF-CM45	f__norank_o__JG30-KF-CM45	g__norank_o__JG30-KF-CM45	s__uncultured_bacterium_g__norank_o__JG30-KF-CM45	OTU779	2	0	0	0	0	0	1	0	0	7	1	2	13
d__Bacteria	k__norank_d__Bacteria	p__Acidobacteria	c__Acidobacteria	o__Solibacterales	f__Solibacteraceae__Subgroup_3_	g__Candidatus_Solibacter	s__unclassified_g__Candidatus_Solibacter	OTU2339	1	0	1	4	1	2	7	0	0	0	0	0	16
d__Bacteria	k__norank_d__Bacteria	p__Planctomycetes	c__Planctomycetacia	o__Planctomycetales	f__Planctomycetaceae	g__Gemmata	s__unclassified_g__Gemmata	OTU2014	2	0	1	2	4	0	4	6	3	0	0	0	22
d__Bacteria	k__norank_d__Bacteria	p__Chloroflexi	c__TK10	o__norank_c__TK10	f__norank_c__TK10	g__norank_c__TK10	s__bacterium_SCGC_AG-212-C10	OTU1859	7	3	1	2	6	2	7	6	5	0	0	1	40
d__Bacteria	k__norank_d__Bacteria	p__Proteobacteria	c__Deltaproteobacteria	o__Desulfurellales	f__Desulfurellaceae	g__G55	s__uncultured_bacterium_g__G55	OTU1648	1	0	0	0	1	1	1	2	1	2	2	1	12
d__Bacteria	k__norank_d__Bacteria	p__Firmicutes	c__Erysipelotrichia	o__Erysipelotrichales	f__Erysipelotrichaceae	g__Turicibacter	s__unclassified_g__Turicibacter	OTU3305	4	0	0	27	10	9	8	0	2	0	0	2	62
d__Bacteria	k__norank_d__Bacteria	p__Bacteroidetes	c__Cytophagia	o__Cytophagales	f__Cytophagaceae	g__Adhaeribacter	s__uncultured_Bacteroidetes_bacterium_g__Adhaeribacter	OTU2084	0	0	0	2	4	1	2	1	1	3	0	0	14
d__Bacteria	k__norank_d__Bacteria	p__Gemmatimonadetes	c__Gemmatimonadetes	o__Gemmatimonadales	f__Gemmatimonadaceae	g__norank_f__Gemmatimonadaceae	s__uncultured_Gemmatimonas_sp._g__norank	OTU342	51	39	21	70	36	47	80	25	38	1	1	1	410
d__Bacteria	k__norank_d__Bacteria	p__Planctomycetes	c__Planctomycetacia	o__Planctomycetales	f__Planctomycetaceae	g__norank_f__Planctomycetaceae	s__uncultured_Singulisphaera_sp._g__norank	OTU3122	0	0	0	3	1	0	0	2	0	0	0	0	6
d__Bacteria	k__norank_d__Bacteria	p__Actinobacteria	c__Actinobacteria	o__Gaiellales	f__norank_o__Gaiellales	g__norank_o__Gaiellales	s__unclassified_g__norank_o__Gaiellales	OTU1053	9	3	2	5	2	5	12	9	9	3	3	1	63
d__Bacteria	k__norank_d__Bacteria	p__Actinobacteria	c__Actinobacteria	o__Acidimicrobiales	f__norank_o__Acidimicrobiales	g__norank_o__Acidimicrobiales	s__uncultured_bacterium_g__norank_o__Acidimicrobiales	OTU341	12	7	9	26	16	13	23	12	6	16	6	11	157
d__Bacteria	k__norank_d__Bacteria	p__Chloroflexi	c__JG30-KF-CM66	o__norank_c__JG30-KF-CM66	f__norank_c__JG30-KF-CM66	g__norank_c__JG30-KF-CM66	s__uncultured_bacterium_g__norank_c__JG30-KF-CM66	OTU595	4	1	1	3	2	1	6	7	6	3	0	3	37
d__Bacteria	k__norank_d__Bacteria	p__Proteobacteria	c__Alphaproteobacteria	o__Rhodospirillales	f__Rhodospirillaceae	g__unclassified_f__Rhodospirillaceae	s__unclassified_f__Rhodospirillaceae	OTU125	0	3	1	2	0	0	0	0	0	0	0	1	7
d__Bacteria	k__norank_d__Bacteria	p__Proteobacteria	c__Gammaproteobacteria	o__Legionellales	f__Coxiellaceae	g__Aquicella	s__uncultured_Aquicella_sp.	OTU1238	1	1	1	1	2	0	1	3	0	0	0	0	10
d__Bacteria	k__norank_d__Bacteria	p__Planctomycetes	c__Planctomycetacia	o__Planctomycetales	f__Planctomycetaceae	g__Pirellula	s__unclassified_g__Pirellula	OTU1498	3	2	1	2	0	0	1	0	1	1	0	1	12
d__Bacteria	k__norank_d__Bacteria	p__Actinobacteria	c__Actinobacteria	o__Acidimicrobiales	f__norank_o__Acidimicrobiales	g__norank_o__Acidimicrobiales	s__wastewater_metagenome_g__norank	OTU1105	2	3	1	7	3	6	14	8	11	4	2	1	62
d__Bacteria	k__norank_d__Bacteria	p__Proteobacteria	c__Deltaproteobacteria	o__Desulfurellales	f__Desulfurellaceae	g__G55	s__uncultured_bacterium_g__G55	OTU2115	2	0	1	3	0	7	10	1	0	1	1	1	27
d__Bacteria	k__norank_d__Bacteria	p__Verrucomicrobia	c__OPB35_soil_group	o__norank_c__OPB35_soil_group	f__norank_c__OPB35_soil_group	g__norank_c__OPB35_soil_group	s__unclassified_g__norank_c__OPB35_soil_group	OTU1944	34	12	10	9	8	0	16	5	2	0	0	0	96
d__Bacteria	k__norank_d__Bacteria	p__Actinobacteria	c__Actinobacteria	o__Solirubrobacterales	f__0319-6M6	g__norank_f__0319-6M6	s__uncultured_organism_g__norank_f__0319-6M6	OTU2635	4	2	1	3	5	5	42	23	22	14	3	3	127
d__Bacteria	k__norank_d__Bacteria	p__Proteobacteria	c__Deltaproteobacteria	o__Myxococcales	f__Haliangiaceae	g__Haliangium	s__uncultured_sludge_bacterium_A9	OTU498	2	4	2	4	0	0	3	1	0	0	0	0	16
d__Bacteria	k__norank_d__Bacteria	p__Chloroflexi	c__Thermomicrobia	o__JG30-KF-CM45	f__norank_o__JG30-KF-CM45	g__norank_o__JG30-KF-CM45	s__uncultured_soil_bacterium_g__norank_o__JG30-KF-CM45	OTU2636	8	33	8	14	14	19	8	9	9	301	92	139	654
d__Bacteria	k__norank_d__Bacteria	p__Chloroflexi	c__Anaerolineae	o__Anaerolineales	f__Anaerolineaceae	g__norank_f__Anaerolineaceae	s__unclassified_g__norank_f__Anaerolineaceae	OTU841	0	0	0	0	0	0	0	0	1	3	2	0	6
d__Bacteria	k__norank_d__Bacteria	p__Acidobacteria	c__Acidobacteria	o__Blastocatellales	f__Blastocatellaceae__Subgroup_4_	g__RB41	s__unclassified_g__RB41	OTU1693	274	94	133	47	80	17	87	83	72	1	0	0	888
d__Bacteria	k__norank_d__Bacteria	p__Acidobacteria	c__Acidobacteria	o__Blastocatellales	f__Blastocatellaceae__Subgroup_4_	g__RB41	s__uncultured_Acidobacteriaceae_bacterium_g__RB41	OTU881	329	105	166	67	87	19	166	147	86	23	6	14	1215
d__Bacteria	k__norank_d__Bacteria	p__Chloroflexi	c__Thermomicrobia	o__JG30-KF-CM45	f__norank_o__JG30-KF-CM45	g__norank_o__JG30-KF-CM45	s__unclassified_g__norank_o__JG30-KF-CM45	OTU1104	0	3	1	1	4	5	3	3	2	7	5	2	36
d__Bacteria	k__norank_d__Bacteria	p__Bacteroidetes	c__Sphingobacteriia	o__Sphingobacteriales	f__unclassified_o__Sphingobacteriales	g__unclassified_o__Sphingobacteriales	s__unclassified_o__Sphingobacteriales	OTU1738	1	0	0	0	0	0	9	0	0	0	0	0	10
d__Bacteria	k__norank_d__Bacteria	p__Proteobacteria	c__Deltaproteobacteria	o__Myxococcales	f__Sandaracinaceae	g__norank_f__Sandaracinaceae	s__unclassified_g__norank_f__Sandaracinaceae	OTU731	1	0	0	0	0	0	0	0	0	1	2	6	10
d__Bacteria	k__norank_d__Bacteria	p__Acidobacteria	c__Acidobacteria	o__Blastocatellales	f__Blastocatellaceae__Subgroup_4_	g__RB41	s__Acidobacterium_sp._Ac_12_G8	OTU1302	45	28	15	65	11	3	40	32	29	56	4	14	342
d__Bacteria	k__norank_d__Bacteria	p__Proteobacteria	c__Alphaproteobacteria	o__Rhizobiales	f__Methylobacteriaceae	g__norank_f__Methylobacteriaceae	s__unclassified_g__norank_f__Methylobacteriaceae	OTU860	3	2	1	1	0	2	0	0	0	27	36	29	101
d__Bacteria	k__norank_d__Bacteria	p__Tectomicrobia	c__norank_p__Tectomicrobia	o__norank_p__Tectomicrobia	f__norank_p__Tectomicrobia	g__norank_p__Tectomicrobia	s__uncultured_bacterium_g__norank_p__Tectomicrobia	OTU1129	8	3	0	2	10	1	12	6	5	0	0	0	47
d__Bacteria	k__norank_d__Bacteria	p__Proteobacteria	c__Deltaproteobacteria	o__Desulfurellales	f__Desulfurellaceae	g__H16	s__unclassified_g__H16	OTU1260	54	27	37	72	44	81	60	91	35	39	21	50	611
d__Bacteria	k__norank_d__Bacteria	p__Gemmatimonadetes	c__Gemmatimonadetes	o__Longimicrobiales	f__Longimicrobiaceae	g__norank_f__Longimicrobiaceae	s__unclassified_g__norank_f__Longimicrobiaceae	OTU248	2	3	1	0	0	0	1	0	0	3	4	3	17
d__Bacteria	k__norank_d__Bacteria	p__Planctomycetes	c__Planctomycetacia	o__Planctomycetales	f__Planctomycetaceae	g__Planctomyces	s__uncultured_bacterium_g__Planctomyces	OTU2657	4	2	2	10	1	1	6	2	0	4	0	0	32
d__Bacteria	k__norank_d__Bacteria	p__Chloroflexi	c__Chloroflexia	o__Chloroflexales	f__Chloroflexaceae	g__unclassified_f__Chloroflexaceae	s__unclassified_f__Chloroflexaceae	OTU2732	3	0	1	2	5	1	3	2	3	0	0	0	20
d__Bacteria	k__norank_d__Bacteria	p__Actinobacteria	c__Actinobacteria	o__unclassified_c__Actinobacteria	f__unclassified_c__Actinobacteria	g__unclassified_c__Actinobacteria	s__unclassified_c__Actinobacteria	OTU1960	3	1	0	5	4	1	1	2	0	23	9	12	61
d__Bacteria	k__norank_d__Bacteria	p__Actinobacteria	c__Actinobacteria	o__Gaiellales	f__norank_o__Gaiellales	g__norank_o__Gaiellales	s__unclassified_g__norank_o__Gaiellales	OTU2369	2	3	1	5	0	4	9	5	2	9	1	6	47
d__Bacteria	k__norank_d__Bacteria	p__Proteobacteria	c__Alphaproteobacteria	o__Rhizobiales	f__unclassified_o__Rhizobiales	g__unclassified_o__Rhizobiales	s__unclassified_o__Rhizobiales	OTU2771	67	28	34	53	46	52	106	71	51	67	18	22	615
d__Bacteria	k__norank_d__Bacteria	p__Planctomycetes	c__Planctomycetacia	o__Planctomycetales	f__Planctomycetaceae	g__norank_f__Planctomycetaceae	s__unclassified_g__norank_f__Planctomycetaceae	OTU1168	2	0	0	0	0	0	2	0	4	0	0	0	8
d__Bacteria	k__norank_d__Bacteria	p__Verrucomicrobia	c__OPB35_soil_group	o__norank_c__OPB35_soil_group	f__norank_c__OPB35_soil_group	g__norank_c__OPB35_soil_group	s__uncultured_Verrucomicrobia_bacterium_g__norank_c__OPB35_soil_group	OTU1877	3	0	2	0	0	0	7	1	3	0	0	0	16
d__Bacteria	k__norank_d__Bacteria	p__Proteobacteria	c__Deltaproteobacteria	o__Myxococcales	f__Sandaracinaceae	g__norank_f__Sandaracinaceae	s__unclassified_g__norank_f__Sandaracinaceae	OTU81	4	3	3	6	2	3	3	2	1	2	0	2	31
d__Bacteria	k__norank_d__Bacteria	p__Actinobacteria	c__Actinobacteria	o__norank_c__Actinobacteria	f__norank_c__Actinobacteria	g__norank_c__Actinobacteria	s__unclassified_g__norank_c__Actinobacteria	OTU996	10	0	1	0	1	0	3	0	7	0	0	0	22
d__Bacteria	k__norank_d__Bacteria	p__Proteobacteria	c__Alphaproteobacteria	o__Rhodospirillales	f__Acetobacteraceae	g__norank_f__Acetobacteraceae	s__unclassified_g__norank_f__Acetobacteraceae	OTU766	0	0	0	0	0	0	1	0	0	10	3	5	19
d__Bacteria	k__norank_d__Bacteria	p__Planctomycetes	c__Planctomycetacia	o__Planctomycetales	f__Planctomycetaceae	g__Pirellula	s__unclassified_g__Pirellula	OTU971	25	4	19	4	10	1	3	6	3	4	0	0	79
d__Bacteria	k__norank_d__Bacteria	p__Actinobacteria	c__Actinobacteria	o__Micromonosporales	f__Micromonosporaceae	g__Virgisporangium	s__Virgisporangium_ochraceum	OTU1386	30	20	15	60	26	55	69	40	17	25	12	6	375
d__Bacteria	k__norank_d__Bacteria	p__Proteobacteria	c__Alphaproteobacteria	o__Rhodospirillales	f__MNC12	g__norank_f__MNC12	s__unclassified_g__norank_f__MNC12	OTU3021	1	0	0	7	5	5	0	0	2	0	0	0	20
d__Bacteria	k__norank_d__Bacteria	p__Planctomycetes	c__Planctomycetacia	o__Planctomycetales	f__Planctomycetaceae	g__Gemmata	s__unclassified_g__Gemmata	OTU72	0	3	2	0	2	1	0	0	0	1	0	0	9
d__Bacteria	k__norank_d__Bacteria	p__Tectomicrobia	c__Tectomicrobia_Incertae_Sedis	o__Unknown_Order_c__Tectomicrobia_Incertae_Sedis	f__Unknown_Family_o__Unknown_Order_c__Tectomicrobia_Incertae_Sedis	g__Candidatus_Entotheonella	s__unclassified_g__Candidatus_Entotheonella	OTU980	3	4	2	5	1	10	7	5	5	9	2	5	58
d__Bacteria	k__norank_d__Bacteria	p__Actinobacteria	c__Actinobacteria	o__Solirubrobacterales	f__unclassified_o__Solirubrobacterales	g__unclassified_o__Solirubrobacterales	s__unclassified_o__Solirubrobacterales	OTU1196	0	2	1	1	1	1	0	0	1	2	0	1	10
d__Bacteria	k__norank_d__Bacteria	p__Planctomycetes	c__Planctomycetacia	o__Planctomycetales	f__Planctomycetaceae	g__norank_f__Planctomycetaceae	s__unclassified_g__norank_f__Planctomycetaceae	OTU1943	2	0	0	2	0	0	3	0	0	1	0	0	8
d__Bacteria	k__norank_d__Bacteria	p__Planctomycetes	c__Planctomycetacia	o__Planctomycetales	f__Planctomycetaceae	g__norank_f__Planctomycetaceae	s__unclassified_g__norank_f__Planctomycetaceae	OTU1942	0	0	0	3	0	0	3	0	0	0	0	0	6
d__Bacteria	k__norank_d__Bacteria	p__Bacteroidetes	c__Sphingobacteriia	o__Sphingobacteriales	f__Chitinophagaceae	g__norank_f__Chitinophagaceae	s__unclassified_g__norank_f__Chitinophagaceae	OTU2413	4	0	2	1	1	0	30	9	6	5	1	9	68
d__Bacteria	k__norank_d__Bacteria	p__Proteobacteria	c__Alphaproteobacteria	o__Sphingomonadales	f__Sphingomonadaceae	g__Sphingomonas	s__Sphingomonas_koreensis_g__Sphingomonas	OTU514	1	1	1	0	0	0	0	1	0	20	16	4	44
d__Bacteria	k__norank_d__Bacteria	p__Bacteroidetes	c__Cytophagia	o__Cytophagales	f__Cytophagaceae	g__norank_f__Cytophagaceae	s__uncultured_Flexibacter_sp._g__norank_f__Cytophagaceae	OTU411	0	1	0	0	0	1	1	1	0	0	0	0	4
d__Bacteria	k__norank_d__Bacteria	p__Chloroflexi	c__Chloroflexia	o__Chloroflexales	f__Roseiflexaceae	g__Roseiflexus	s__uncultured_bacterium_g__Roseiflexus	OTU1617	3	4	4	1	3	1	11	12	4	0	0	0	43
d__Bacteria	k__norank_d__Bacteria	p__Proteobacteria	c__Gammaproteobacteria	o__Xanthomonadales	f__Xanthomonadales_Incertae_Sedis	g__Acidibacter	s__unclassified_g__Acidibacter	OTU2126	21	9	7	11	11	16	25	15	8	2	0	2	127
d__Bacteria	k__norank_d__Bacteria	p__Proteobacteria	c__Deltaproteobacteria	o__Myxococcales	f__Phaselicystidaceae	g__Phaselicystis	s__unclassified_g__Phaselicystis	OTU3085	2	1	3	6	0	0	1	2	1	0	0	0	16
d__Bacteria	k__norank_d__Bacteria	p__Proteobacteria	c__Betaproteobacteria	o__TRA3-20	f__norank_o__TRA3-20	g__norank_o__TRA3-20	s__unclassified_g__norank_o__TRA3-20	OTU1351	7	9	3	10	2	13	4	6	2	5	5	2	68
d__Bacteria	k__norank_d__Bacteria	p__Proteobacteria	c__Alphaproteobacteria	o__Sphingomonadales	f__Sphingomonadaceae	g__Sphingomonas	s__unclassified_g__Sphingomonas	OTU3194	3	1	1	4	16	9	5	1	0	4	1	3	48
d__Bacteria	k__norank_d__Bacteria	p__Planctomycetes	c__Planctomycetacia	o__Planctomycetales	f__Planctomycetaceae	g__Planctomyces	s__unclassified_g__Planctomyces	OTU170	1	1	0	1	0	1	1	0	0	2	0	0	7
d__Bacteria	k__norank_d__Bacteria	p__Deinococcus-Thermus	c__Deinococci	o__Deinococcales	f__Trueperaceae	g__Truepera	s__uncultured_bacterium_g__Truepera	OTU3106	0	3	0	13	23	4	0	0	0	0	0	0	43
d__Bacteria	k__norank_d__Bacteria	p__Proteobacteria	c__Alphaproteobacteria	o__Rhizobiales	f__Xanthobacteraceae	g__Labrys	s__unclassified_g__Labrys	OTU2854	22	19	20	23	30	22	69	28	23	36	13	15	320
d__Bacteria	k__norank_d__Bacteria	p__Planctomycetes	c__Planctomycetacia	o__Planctomycetales	f__Planctomycetaceae	g__Planctomyces	s__unclassified_g__Planctomyces	OTU533	0	0	0	10	0	3	0	1	0	2	1	0	17
d__Bacteria	k__norank_d__Bacteria	p__Firmicutes	c__Bacilli	o__Bacillales	f__Bacillaceae	g__Bacillus	s__unclassified_g__Bacillus	OTU1313	26	18	6	67	35	34	49	16	20	9	9	10	299
d__Bacteria	k__norank_d__Bacteria	p__Cyanobacteria	c__Cyanobacteria	o__SubsectionIII	f__FamilyI_o__SubsectionIII	g__Microcoleus	s__Oscillatoria_nigro-viridis_PCC_7112	OTU2582	60	59	444	69	7	0	50	9	20	0	0	0	718
d__Bacteria	k__norank_d__Bacteria	p__Firmicutes	c__Bacilli	o__Lactobacillales	f__Streptococcaceae	g__Streptococcus	s__unclassified_g__Streptococcus	OTU3147	2	0	0	1	0	2	3	1	0	0	0	0	9
d__Bacteria	k__norank_d__Bacteria	p__Chloroflexi	c__unclassified_p__Chloroflexi	o__unclassified_p__Chloroflexi	f__unclassified_p__Chloroflexi	g__unclassified_p__Chloroflexi	s__unclassified_p__Chloroflexi	OTU1565	10	6	2	5	10	2	6	12	4	2	1	0	60
d__Bacteria	k__norank_d__Bacteria	p__Chloroflexi	c__Chloroflexia	o__Chloroflexales	f__Chloroflexaceae	g__unclassified_f__Chloroflexaceae	s__unclassified_f__Chloroflexaceae	OTU1657	6	0	0	1	11	2	8	2	3	0	0	0	33
d__Bacteria	k__norank_d__Bacteria	p__Planctomycetes	c__Phycisphaerae	o__Tepidisphaerales	f__Tepidisphaeraceae	g__norank_f__Tepidisphaeraceae	s__uncultured_planctomycete_g__norank_f__Tepidisphaeraceae	OTU256	5	7	0	10	3	0	0	2	1	0	0	0	28
d__Bacteria	k__norank_d__Bacteria	p__Actinobacteria	c__Actinobacteria	o__unclassified_c__Actinobacteria	f__unclassified_c__Actinobacteria	g__unclassified_c__Actinobacteria	s__unclassified_c__Actinobacteria	OTU687	0	0	0	2	0	2	0	2	1	0	1	1	9
d__Bacteria	k__norank_d__Bacteria	p__Actinobacteria	c__Actinobacteria	o__Solirubrobacterales	f__Elev-16S-1332	g__norank_f__Elev-16S-1332	s__unclassified_g__norank_f__Elev-16S-1332	OTU738	0	1	1	5	0	1	2	2	0	15	12	38	77
d__Bacteria	k__norank_d__Bacteria	p__Proteobacteria	c__Gammaproteobacteria	o__Xanthomonadales	f__Xanthomonadaceae	g__Lysobacter	s__uncultured_Xanthomonas_sp._g__Lysobacter	OTU2802	66	38	49	29	45	32	119	30	25	6	0	1	440
d__Bacteria	k__norank_d__Bacteria	p__Chloroflexi	c__Ardenticatenia	o__Ardenticatenales	f__norank_o__Ardenticatenales	g__norank_o__Ardenticatenales	s__uncultured_bacterium_g__norank_o__Ardenticatenales	OTU2053	11	21	3	51	105	37	11	9	0	0	0	2	250
d__Bacteria	k__norank_d__Bacteria	p__Proteobacteria	c__Alphaproteobacteria	o__Rhodospirillales	f__I-10	g__norank_f__I-10	s__uncultured_alpha_proteobacterium_g__norank_f__I-10	OTU2060	8	0	5	12	4	7	7	6	3	14	6	6	78
d__Bacteria	k__norank_d__Bacteria	p__Gemmatimonadetes	c__Gemmatimonadetes	o__Gemmatimonadales	f__Gemmatimonadaceae	g__Gemmatirosa	s__unclassified_g__Gemmatirosa	OTU2356	4	1	2	4	2	2	10	0	7	1	0	0	33
d__Bacteria	k__norank_d__Bacteria	p__Chloroflexi	c__Chloroflexia	o__Chloroflexales	f__Roseiflexaceae	g__Roseiflexus	s__uncultured_Chloroflexi_bacterium_g__Roseiflexus	OTU27	2	0	2	2	4	3	4	2	0	0	0	0	19
d__Bacteria	k__norank_d__Bacteria	p__Planctomycetes	c__Planctomycetacia	o__Planctomycetales	f__Planctomycetaceae	g__Planctomyces	s__unclassified_g__Planctomyces	OTU570	0	0	0	3	0	0	0	0	1	1	0	0	5
d__Bacteria	k__norank_d__Bacteria	p__Chloroflexi	c__Thermomicrobia	o__JG30-KF-CM45	f__norank_o__JG30-KF-CM45	g__norank_o__JG30-KF-CM45	s__unclassified_g__norank_o__JG30-KF-CM45	OTU383	1	1	0	1	0	1	0	0	0	0	0	0	4
d__Bacteria	k__norank_d__Bacteria	p__Actinobacteria	c__Actinobacteria	o__Streptomycetales	f__Streptomycetaceae	g__Streptomyces	s__unclassified_g__Streptomyces	OTU44	71	29	33	106	153	111	159	63	101	105	77	79	1087
d__Bacteria	k__norank_d__Bacteria	p__Bacteroidetes	c__Sphingobacteriia	o__Sphingobacteriales	f__Chitinophagaceae	g__norank_f__Chitinophagaceae	s__unclassified_g__norank_f__Chitinophagaceae	OTU2707	45	7	18	3	17	2	107	38	47	0	0	0	284
d__Bacteria	k__norank_d__Bacteria	p__Planctomycetes	c__Planctomycetacia	o__Planctomycetales	f__Planctomycetaceae	g__norank_f__Planctomycetaceae	s__uncultured_bacterium_g__norank_f__Planctomycetaceae	OTU1218	4	0	1	4	1	0	2	3	2	0	0	0	17
d__Bacteria	k__norank_d__Bacteria	p__Proteobacteria	c__Alphaproteobacteria	o__Rickettsiales	f__Rickettsiales_Incertae_Sedis	g__Constrictibacter	s__uncultured_soil_bacterium_g__Constrictibacter	OTU630	0	0	0	1	0	1	0	0	0	59	14	12	87
d__Bacteria	k__norank_d__Bacteria	p__Chloroflexi	c__Anaerolineae	o__Anaerolineales	f__Anaerolineaceae	g__norank_f__Anaerolineaceae	s__unclassified_g__norank_f__Anaerolineaceae	OTU197	1	0	0	0	1	1	3	2	0	0	0	0	8
d__Bacteria	k__norank_d__Bacteria	p__Proteobacteria	c__Alphaproteobacteria	o__Rhizobiales	f__JG34-KF-361	g__norank_f__JG34-KF-361	s__unclassified_g__norank_f__JG34-KF-361	OTU2252	35	27	22	42	36	38	100	59	30	19	17	13	438
d__Bacteria	k__norank_d__Bacteria	p__Firmicutes	c__Bacilli	o__Bacillales	f__Bacillaceae	g__unclassified_f__Bacillaceae	s__unclassified_f__Bacillaceae	OTU834	0	0	0	0	0	1	0	1	0	3	1	2	8
d__Bacteria	k__norank_d__Bacteria	p__Chloroflexi	c__Thermomicrobia	o__JG30-KF-CM45	f__norank_o__JG30-KF-CM45	g__norank_o__JG30-KF-CM45	s__uncultured_soil_bacterium_g__norank_o__JG30-KF-CM45	OTU642	0	0	0	0	0	0	0	0	0	2	0	0	2
d__Bacteria	k__norank_d__Bacteria	p__Planctomycetes	c__Planctomycetacia	o__Planctomycetales	f__Planctomycetaceae	g__norank_f__Planctomycetaceae	s__unclassified_g__norank_f__Planctomycetaceae	OTU1568	1	0	1	0	0	0	2	3	1	0	0	0	8
d__Bacteria	k__norank_d__Bacteria	p__Gemmatimonadetes	c__Gemmatimonadetes	o__Gemmatimonadales	f__Gemmatimonadaceae	g__Gemmatirosa	s__unclassified_g__Gemmatirosa	OTU1208	1	2	0	2	0	1	13	4	4	2	0	0	29
d__Bacteria	k__norank_d__Bacteria	p__Actinobacteria	c__Actinobacteria	o__Pseudonocardiales	f__Pseudonocardiaceae	g__Crossiella	s__uncultured_bacterium_g__Crossiella	OTU743	17	4	7	11	10	6	24	35	29	29	17	53	242
d__Bacteria	k__norank_d__Bacteria	p__Proteobacteria	c__Alphaproteobacteria	o__Rickettsiales	f__TK34	g__norank_f__TK34	s__unclassified_g__norank_f__TK34	OTU2318	0	2	2	5	1	1	6	6	2	2	0	0	27
d__Bacteria	k__norank_d__Bacteria	p__unclassified_k__norank_d__Bacteria	c__unclassified_k__norank_d__Bacteria	o__unclassified_k__norank_d__Bacteria	f__unclassified_k__norank_d__Bacteria	g__unclassified_k__norank_d__Bacteria	s__unclassified_k__norank_d__Bacteria	OTU1382	1	0	0	1	3	0	4	10	1	0	0	0	20
d__Bacteria	k__norank_d__Bacteria	p__Chloroflexi	c__Thermomicrobia	o__JG30-KF-CM45	f__norank_o__JG30-KF-CM45	g__norank_o__JG30-KF-CM45	s__unclassified_g__norank_o__JG30-KF-CM45	OTU468	5	5	2	3	3	4	5	6	5	4	8	1	51
d__Bacteria	k__norank_d__Bacteria	p__Actinobacteria	c__Actinobacteria	o__Solirubrobacterales	f__0319-6M6	g__norank_f__0319-6M6	s__unclassified_g__norank_f__0319-6M6	OTU922	6	4	3	14	9	15	15	6	6	61	28	42	209
d__Bacteria	k__norank_d__Bacteria	p__Actinobacteria	c__Actinobacteria	o__unclassified_c__Actinobacteria	f__unclassified_c__Actinobacteria	g__unclassified_c__Actinobacteria	s__unclassified_c__Actinobacteria	OTU2032	2	0	0	0	0	0	1	1	1	0	0	0	5
d__Bacteria	k__norank_d__Bacteria	p__Actinobacteria	c__Actinobacteria	o__Propionibacteriales	f__Nocardioidaceae	g__unclassified_f__Nocardioidaceae	s__unclassified_f__Nocardioidaceae	OTU334	0	1	0	1	1	1	0	0	1	0	0	0	5
d__Bacteria	k__norank_d__Bacteria	p__Latescibacteria	c__norank_p__Latescibacteria	o__norank_p__Latescibacteria	f__norank_p__Latescibacteria	g__norank_p__Latescibacteria	s__uncultured_soil_bacterium_g__norank_p__Latescibacteria	OTU487	7	1	6	0	0	0	3	3	2	0	0	0	22
d__Bacteria	k__norank_d__Bacteria	p__Chloroflexi	c__Anaerolineae	o__Anaerolineales	f__Anaerolineaceae	g__norank_f__Anaerolineaceae	s__unclassified_g__norank_f__Anaerolineaceae	OTU1684	1	9	1	3	5	1	6	1	3	0	0	0	30
d__Bacteria	k__norank_d__Bacteria	p__Acidobacteria	c__Acidobacteria	o__Subgroup_10	f__Sva0725	g__norank_f__Sva0725	s__unclassified_g__norank_f__Sva0725	OTU1584	16	13	11	32	28	33	31	10	9	3	0	2	188
d__Bacteria	k__norank_d__Bacteria	p__Chloroflexi	c__Anaerolineae	o__Anaerolineales	f__Anaerolineaceae	g__norank_f__Anaerolineaceae	s__unclassified_g__norank_f__Anaerolineaceae	OTU1680	1	0	1	2	1	0	2	0	0	0	0	0	7
d__Bacteria	k__norank_d__Bacteria	p__Saccharibacteria	c__norank_p__Saccharibacteria	o__norank_p__Saccharibacteria	f__norank_p__Saccharibacteria	g__norank_p__Saccharibacteria	s__unclassified_g__norank_p__Saccharibacteria	OTU2703	0	0	0	0	1	0	2	0	1	0	0	0	4
d__Bacteria	k__norank_d__Bacteria	p__Actinobacteria	c__Actinobacteria	o__Micrococcales	f__Intrasporangiaceae	g__Ornithinimicrobium	s__Ornithinimicrobium_pekingense	OTU435	1	3	3	33	17	28	0	2	0	2	0	1	90
d__Bacteria	k__norank_d__Bacteria	p__Proteobacteria	c__Deltaproteobacteria	o__Myxococcales	f__BIrii41	g__norank_f__BIrii41	s__uncultured_delta_proteobacterium_g__norank_f__BIrii41	OTU74	3	0	1	0	2	1	0	0	0	0	0	0	7
d__Bacteria	k__norank_d__Bacteria	p__Bacteroidetes	c__Cytophagia	o__Cytophagales	f__Cytophagaceae	g__norank_f__Cytophagaceae	s__uncultured_soil_bacterium_g__norank_f__Cytophagaceae	OTU331	0	10	0	3	16	0	0	0	0	0	1	0	30
d__Bacteria	k__norank_d__Bacteria	p__Proteobacteria	c__Alphaproteobacteria	o__Rhodospirillales	f__I-10	g__norank_f__I-10	s__unclassified_g__norank_f__I-10	OTU2634	7	4	5	15	10	2	9	9	8	0	2	3	74
d__Bacteria	k__norank_d__Bacteria	p__Actinobacteria	c__Actinobacteria	o__Gaiellales	f__norank_o__Gaiellales	g__norank_o__Gaiellales	s__uncultured_organism_g__norank_o__Gaiellales	OTU2585	1	3	1	15	4	12	8	3	2	11	5	11	76
d__Bacteria	k__norank_d__Bacteria	p__Chloroflexi	c__Anaerolineae	o__Anaerolineales	f__Anaerolineaceae	g__norank_f__Anaerolineaceae	s__unclassified_g__norank_f__Anaerolineaceae	OTU1337	1	0	1	0	0	0	0	4	1	0	0	1	8
d__Bacteria	k__norank_d__Bacteria	p__Proteobacteria	c__Deltaproteobacteria	o__Myxococcales	f__Sandaracinaceae	g__norank_f__Sandaracinaceae	s__unclassified_g__norank_f__Sandaracinaceae	OTU1341	2	0	0	0	0	1	1	2	0	0	0	0	6
d__Bacteria	k__norank_d__Bacteria	p__Chloroflexi	c__TK10	o__norank_c__TK10	f__norank_c__TK10	g__norank_c__TK10	s__Chloroflexi_bacterium_JEA33	OTU497	1	3	1	2	6	1	1	0	1	0	0	3	19
d__Bacteria	k__norank_d__Bacteria	p__Gemmatimonadetes	c__Gemmatimonadetes	o__Gemmatimonadales	f__Gemmatimonadaceae	g__norank_f__Gemmatimonadaceae	s__uncultured_Gemmatimonadales_bacterium_g__norank	OTU1521	5	4	4	7	6	5	6	1	2	0	0	1	41
d__Bacteria	k__norank_d__Bacteria	p__BRC1	c__norank_p__BRC1	o__norank_p__BRC1	f__norank_p__BRC1	g__norank_p__BRC1	s__unclassified_g__norank_p__BRC1	OTU69	0	0	2	0	0	0	0	1	0	0	0	0	3
d__Bacteria	k__norank_d__Bacteria	p__Chloroflexi	c__TK10	o__norank_c__TK10	f__norank_c__TK10	g__norank_c__TK10	s__uncultured_bacterium_g__norank_c__TK10	OTU2459	9	2	1	2	0	0	7	12	8	0	0	0	41
d__Bacteria	k__norank_d__Bacteria	p__Proteobacteria	c__Betaproteobacteria	o__Nitrosomonadales	f__Nitrosomonadaceae	g__Nitrosospira	s__unclassified_g__Nitrosospira	OTU379	297	415	198	410	651	785	77	34	32	16	9	8	2932
d__Bacteria	k__norank_d__Bacteria	p__Actinobacteria	c__Actinobacteria	o__Acidimicrobiales	f__Acidimicrobiaceae	g__norank_f__Acidimicrobiaceae	s__unclassified_g__norank_f__Acidimicrobiaceae	OTU3192	4	1	2	5	1	4	9	2	3	3	0	6	40
d__Bacteria	k__norank_d__Bacteria	p__Actinobacteria	c__Actinobacteria	o__Solirubrobacterales	f__Q3-6C1	g__norank_f__Q3-6C1	s__uncultured_bacterium_g__norank_f__Q3-6C1	OTU1344	20	12	11	25	17	24	38	21	18	3	3	8	200
d__Bacteria	k__norank_d__Bacteria	p__Planctomycetes	c__Planctomycetacia	o__Planctomycetales	f__Planctomycetaceae	g__unclassified_f__Planctomycetaceae	s__unclassified_f__Planctomycetaceae	OTU3118	0	0	1	1	3	0	0	0	0	0	0	0	5
d__Bacteria	k__norank_d__Bacteria	p__Planctomycetes	c__Planctomycetacia	o__Planctomycetales	f__Planctomycetaceae	g__unclassified_f__Planctomycetaceae	s__unclassified_f__Planctomycetaceae	OTU515	1	2	1	25	7	0	2	2	0	30	1	0	71
d__Bacteria	k__norank_d__Bacteria	p__Actinobacteria	c__Actinobacteria	o__Gaiellales	f__norank_o__Gaiellales	g__norank_o__Gaiellales	s__uncultured_organism_g__norank_o__Gaiellales	OTU2746	17	14	16	14	13	17	34	12	21	2	2	2	164
d__Bacteria	k__norank_d__Bacteria	p__Chloroflexi	c__Thermomicrobia	o__JG30-KF-CM45	f__norank_o__JG30-KF-CM45	g__norank_o__JG30-KF-CM45	s__uncultured_bacterium_g__norank_o__JG30-KF-CM45	OTU1010	0	3	0	0	1	0	1	2	2	1	0	0	10
d__Bacteria	k__norank_d__Bacteria	p__Actinobacteria	c__Actinobacteria	o__Solirubrobacterales	f__0319-6M6	g__norank_f__0319-6M6	s__unclassified_g__norank_f__0319-6M6	OTU1146	16	11	15	15	13	25	41	38	43	78	23	28	346
d__Bacteria	k__norank_d__Bacteria	p__Chloroflexi	c__Anaerolineae	o__Anaerolineales	f__Anaerolineaceae	g__norank_f__Anaerolineaceae	s__anaerobic_digester_metagenome_g__norank_f__Anaerolineaceae	OTU2701	2	0	0	1	1	0	10	1	1	0	0	0	16
d__Bacteria	k__norank_d__Bacteria	p__Actinobacteria	c__Actinobacteria	o__Solirubrobacterales	f__Elev-16S-1332	g__norank_f__Elev-16S-1332	s__uncultured_Rubrobacteraceae_bacterium_g__norank_f__Elev-16S-1332	OTU685	2	0	0	17	8	10	6	5	5	134	35	43	265
d__Bacteria	k__norank_d__Bacteria	p__Planctomycetes	c__Planctomycetacia	o__Planctomycetales	f__Planctomycetaceae	g__norank_f__Planctomycetaceae	s__unclassified_g__norank_f__Planctomycetaceae	OTU492	5	2	1	0	0	0	0	0	0	0	0	0	8
d__Bacteria	k__norank_d__Bacteria	p__Planctomycetes	c__Phycisphaerae	o__Tepidisphaerales	f__Tepidisphaeraceae	g__norank_f__Tepidisphaeraceae	s__uncultured_bacterium_g__norank_f__Tepidisphaeraceae	OTU464	2	1	1	3	0	0	1	2	1	0	0	0	11
d__Bacteria	k__norank_d__Bacteria	p__Firmicutes	c__Bacilli	o__Bacillales	f__Bacillaceae	g__unclassified_f__Bacillaceae	s__unclassified_f__Bacillaceae	OTU1114	3	0	0	1	2	0	1	3	1	0	0	0	11
d__Bacteria	k__norank_d__Bacteria	p__Actinobacteria	c__Actinobacteria	o__Streptosporangiales	f__Streptosporangiaceae	g__Thermopolyspora	s__uncultured_compost_bacterium_g__Thermopolyspora	OTU1444	3	0	0	0	1	1	0	4	1	0	0	0	10
d__Bacteria	k__norank_d__Bacteria	p__Firmicutes	c__Bacilli	o__Bacillales	f__Bacillaceae	g__unclassified_f__Bacillaceae	s__unclassified_f__Bacillaceae	OTU1111	1	5	0	1	7	2	2	5	2	0	0	0	25
d__Bacteria	k__norank_d__Bacteria	p__Planctomycetes	c__Phycisphaerae	o__Tepidisphaerales	f__Tepidisphaeraceae	g__norank_f__Tepidisphaeraceae	s__uncultured_soil_bacterium_g__norank_f__Tepidisphaeraceae	OTU1058	1	0	0	5	0	0	1	0	2	0	0	1	10
d__Bacteria	k__norank_d__Bacteria	p__Chloroflexi	c__Thermomicrobia	o__JG30-KF-CM45	f__norank_o__JG30-KF-CM45	g__norank_o__JG30-KF-CM45	s__unclassified_g__norank_o__JG30-KF-CM45	OTU726	1	0	0	0	1	1	1	1	1	1	0	4	11
d__Bacteria	k__norank_d__Bacteria	p__unclassified_k__norank_d__Bacteria	c__unclassified_k__norank_d__Bacteria	o__unclassified_k__norank_d__Bacteria	f__unclassified_k__norank_d__Bacteria	g__unclassified_k__norank_d__Bacteria	s__unclassified_k__norank_d__Bacteria	OTU1074	0	4	1	2	1	1	0	1	1	0	0	0	11
d__Bacteria	k__norank_d__Bacteria	p__Proteobacteria	c__Alphaproteobacteria	o__Caulobacterales	f__Caulobacteraceae	g__Brevundimonas	s__unclassified_g__Brevundimonas	OTU815	0	0	0	0	0	0	0	0	0	5	7	4	16
d__Bacteria	k__norank_d__Bacteria	p__Acidobacteria	c__Acidobacteria	o__Subgroup_7	f__norank_o__Subgroup_7	g__norank_o__Subgroup_7	s__unclassified_g__norank_o__Subgroup_7	OTU695	2	2	0	0	0	1	4	1	3	6	0	2	21
d__Bacteria	k__norank_d__Bacteria	p__Planctomycetes	c__Planctomycetacia	o__Planctomycetales	f__Planctomycetaceae	g__norank_f__Planctomycetaceae	s__unclassified_g__norank_f__Planctomycetaceae	OTU344	3	7	1	8	2	0	1	3	0	0	0	0	25
d__Bacteria	k__norank_d__Bacteria	p__Actinobacteria	c__Actinobacteria	o__Propionibacteriales	f__Nocardioidaceae	g__unclassified_f__Nocardioidaceae	s__unclassified_f__Nocardioidaceae	OTU3215	128	120	106	311	391	371	218	95	118	313	99	163	2433
d__Bacteria	k__norank_d__Bacteria	p__Proteobacteria	c__Deltaproteobacteria	o__Oligoflexales	f__0319-6G20	g__norank_f__0319-6G20	s__uncultured_Syntrophobacteraceae_bacterium_g__norank_f__0319-6G20	OTU1509	30	8	9	11	18	17	29	15	3	7	1	2	150
d__Bacteria	k__norank_d__Bacteria	p__Proteobacteria	c__Deltaproteobacteria	o__Bdellovibrionales	f__Bdellovibrionaceae	g__Bdellovibrio	s__uncultured_bacterium_g__Bdellovibrio	OTU1984	1	0	1	3	10	0	2	2	0	0	0	0	19
d__Bacteria	k__norank_d__Bacteria	p__Proteobacteria	c__Deltaproteobacteria	o__Desulfurellales	f__Desulfurellaceae	g__H16	s__unclassified_g__H16	OTU2349	42	25	13	26	19	24	40	19	32	0	1	0	241
d__Bacteria	k__norank_d__Bacteria	p__Proteobacteria	c__Alphaproteobacteria	o__Rhodospirillales	f__Rhodospirillales_Incertae_Sedis	g__Candidatus_Alysiosphaera	s__uncultured_alpha_proteobacterium_g__Candidatus_Alysiosphaera	OTU1821	8	7	1	13	12	11	18	5	6	1	0	0	82
d__Bacteria	k__norank_d__Bacteria	p__Gemmatimonadetes	c__Gemmatimonadetes	o__Gemmatimonadales	f__Gemmatimonadaceae	g__unclassified_f__Gemmatimonadaceae	s__unclassified_f__Gemmatimonadaceae	OTU1404	0	1	1	0	0	0	3	3	2	0	0	1	11
d__Bacteria	k__norank_d__Bacteria	p__Proteobacteria	c__Gammaproteobacteria	o__Xanthomonadales	f__Xanthomonadaceae	g__Lysobacter	s__Lysobacter_soli	OTU582	14	5	1	11	10	38	7	2	0	11	0	3	102
d__Bacteria	k__norank_d__Bacteria	p__Proteobacteria	c__Alphaproteobacteria	o__Rhodospirillales	f__Acetobacteraceae	g__norank_f__Acetobacteraceae	s__unclassified_g__norank_f__Acetobacteraceae	OTU2430	5	4	0	3	2	1	14	6	4	2	7	5	53
d__Bacteria	k__norank_d__Bacteria	p__Proteobacteria	c__Alphaproteobacteria	o__Caulobacterales	f__Caulobacteraceae	g__norank_f__Caulobacteraceae	s__Caulobacter_sp._JM6_2011_	OTU760	0	0	0	1	0	0	0	0	0	4	0	3	8
d__Bacteria	k__norank_d__Bacteria	p__Acidobacteria	c__Acidobacteria	o__Subgroup_10	f__ABS-19	g__norank_f__ABS-19	s__unclassified_g__norank_f__ABS-19	OTU2378	4	3	7	3	8	6	32	5	10	3	0	6	87
d__Bacteria	k__norank_d__Bacteria	p__Chloroflexi	c__TK10	o__norank_c__TK10	f__norank_c__TK10	g__norank_c__TK10	s__unclassified_g__norank_c__TK10	OTU2546	31	26	9	22	44	15	37	51	26	1	0	1	263
d__Bacteria	k__norank_d__Bacteria	p__Proteobacteria	c__Alphaproteobacteria	o__Rhodospirillales	f__Rhodospirillales_Incertae_Sedis	g__Geminicoccus	s__uncultured_bacterium_g__Geminicoccus	OTU2556	4	2	4	4	8	3	14	3	5	0	0	0	47
d__Bacteria	k__norank_d__Bacteria	p__Actinobacteria	c__Actinobacteria	o__Propionibacteriales	f__Nocardioidaceae	g__Aeromicrobium	s__uncultured_bacterium_g__Aeromicrobium	OTU2666	16	19	6	32	31	11	13	3	1	3	4	4	143
d__Bacteria	k__norank_d__Bacteria	p__Proteobacteria	c__Alphaproteobacteria	o__Rhizobiales	f__norank_o__Rhizobiales	g__norank_o__Rhizobiales	s__unclassified_g__norank_o__Rhizobiales	OTU868	2	3	4	15	7	34	3	5	3	60	35	39	210
d__Bacteria	k__norank_d__Bacteria	p__Proteobacteria	c__Alphaproteobacteria	o__Rhodospirillales	f__unclassified_o__Rhodospirillales	g__unclassified_o__Rhodospirillales	s__unclassified_o__Rhodospirillales	OTU575	1	0	0	6	1	7	1	2	0	42	6	6	72
d__Bacteria	k__norank_d__Bacteria	p__Bacteroidetes	c__Sphingobacteriia	o__Sphingobacteriales	f__Chitinophagaceae	g__Flavisolibacter	s__unclassified_g__Flavisolibacter	OTU502	7	4	2	4	10	5	11	6	6	6	1	1	63
d__Bacteria	k__norank_d__Bacteria	p__Proteobacteria	c__Alphaproteobacteria	o__Rhodobacterales	f__Rhodobacteraceae	g__Amaricoccus	s__uncultured_bacterium_g__Amaricoccus	OTU1866	2	6	5	9	6	13	7	0	4	0	1	2	55
d__Bacteria	k__norank_d__Bacteria	p__Chloroflexi	c__Chloroflexia	o__Kallotenuales	f__AKIW781	g__norank_f__AKIW781	s__unclassified_g__norank_f__AKIW781	OTU2964	1	3	2	1	1	4	4	3	0	4	0	0	23
d__Bacteria	k__norank_d__Bacteria	p__Chloroflexi	c__Anaerolineae	o__Anaerolineales	f__Anaerolineaceae	g__norank_f__Anaerolineaceae	s__unclassified_g__norank_f__Anaerolineaceae	OTU214	3	2	0	1	3	0	0	0	0	0	0	0	9
d__Bacteria	k__norank_d__Bacteria	p__Chloroflexi	c__Chloroflexia	o__Chloroflexales	f__Roseiflexaceae	g__Roseiflexus	s__unclassified_g__Roseiflexus	OTU210	2	0	0	0	2	0	2	1	0	0	0	0	7
d__Bacteria	k__norank_d__Bacteria	p__Chloroflexi	c__JG30-KF-CM66	o__norank_c__JG30-KF-CM66	f__norank_c__JG30-KF-CM66	g__norank_c__JG30-KF-CM66	s__unclassified_g__norank_c__JG30-KF-CM66	OTU2358	19	7	8	10	14	7	27	22	18	3	2	2	139
d__Bacteria	k__norank_d__Bacteria	p__Chloroflexi	c__Anaerolineae	o__Anaerolineales	f__Anaerolineaceae	g__norank_f__Anaerolineaceae	s__unclassified_g__norank_f__Anaerolineaceae	OTU2136	50	10	15	1	3	0	8	13	13	0	0	0	113
d__Bacteria	k__norank_d__Bacteria	p__Proteobacteria	c__Deltaproteobacteria	o__Myxococcales	f__Haliangiaceae	g__Haliangium	s__uncultured_bacterium_g__Haliangium	OTU1102	23	22	7	27	37	40	23	9	9	4	0	1	202
d__Bacteria	k__norank_d__Bacteria	p__Planctomycetes	c__Planctomycetacia	o__Planctomycetales	f__Planctomycetaceae	g__Planctomyces	s__uncultured_bacterium_g__Planctomyces	OTU2418	0	0	0	0	1	0	1	0	0	0	0	0	2
d__Bacteria	k__norank_d__Bacteria	p__Verrucomicrobia	c__OPB35_soil_group	o__norank_c__OPB35_soil_group	f__norank_c__OPB35_soil_group	g__norank_c__OPB35_soil_group	s__unclassified_g__norank_c__OPB35_soil_group	OTU149	4	0	1	0	0	0	1	0	0	0	0	0	6
d__Bacteria	k__norank_d__Bacteria	p__Planctomycetes	c__Planctomycetacia	o__Planctomycetales	f__Planctomycetaceae	g__unclassified_f__Planctomycetaceae	s__unclassified_f__Planctomycetaceae	OTU1183	2	0	0	2	2	0	3	2	2	1	0	0	14
d__Bacteria	k__norank_d__Bacteria	p__Proteobacteria	c__Alphaproteobacteria	o__Rhodospirillales	f__Rhodospirillaceae	g__Skermanella	s__unclassified_g__Skermanella	OTU1246	81	23	74	92	102	114	195	69	69	211	116	173	1319
d__Bacteria	k__norank_d__Bacteria	p__Proteobacteria	c__Alphaproteobacteria	o__Rhodospirillales	f__AKYH478	g__norank_f__AKYH478	s__uncultured_alpha_proteobacterium_g__norank_f__AKYH478	OTU652	0	0	0	0	0	0	0	0	0	10	0	8	18
d__Bacteria	k__norank_d__Bacteria	p__Proteobacteria	c__Deltaproteobacteria	o__Myxococcales	f__Haliangiaceae	g__Haliangium	s__unclassified_g__Haliangium	OTU2777	4	1	1	0	0	1	29	12	7	0	0	0	55
d__Bacteria	k__norank_d__Bacteria	p__Actinobacteria	c__Actinobacteria	o__Propionibacteriales	f__Nocardioidaceae	g__Nocardioides	s__unclassified_g__Nocardioides	OTU2823	40	32	31	52	79	46	105	42	57	129	53	74	740
d__Bacteria	k__norank_d__Bacteria	p__unclassified_k__norank_d__Bacteria	c__unclassified_k__norank_d__Bacteria	o__unclassified_k__norank_d__Bacteria	f__unclassified_k__norank_d__Bacteria	g__unclassified_k__norank_d__Bacteria	s__unclassified_k__norank_d__Bacteria	OTU2461	10	10	6	11	16	6	16	25	10	1	0	0	111
d__Bacteria	k__norank_d__Bacteria	p__Gemmatimonadetes	c__Gemmatimonadetes	o__norank_c__Gemmatimonadetes	f__norank_c__Gemmatimonadetes	g__norank_c__Gemmatimonadetes	s__unclassified_g__norank_c__Gemmatimonadetes	OTU2955	1	1	0	1	0	1	1	0	0	0	0	0	5
d__Bacteria	k__norank_d__Bacteria	p__Actinobacteria	c__Actinobacteria	o__Acidimicrobiales	f__unclassified_o__Acidimicrobiales	g__unclassified_o__Acidimicrobiales	s__unclassified_o__Acidimicrobiales	OTU521	0	0	0	0	0	0	0	0	1	6	2	7	16
d__Bacteria	k__norank_d__Bacteria	p__Planctomycetes	c__Phycisphaerae	o__Phycisphaerales	f__Phycisphaeraceae	g__SM1A02	s__uncultured_bacterium_g__SM1A02	OTU1573	1	0	0	1	0	0	3	0	0	0	1	0	6
d__Bacteria	k__norank_d__Bacteria	p__Actinobacteria	c__Actinobacteria	o__Acidimicrobiales	f__unclassified_o__Acidimicrobiales	g__unclassified_o__Acidimicrobiales	s__unclassified_o__Acidimicrobiales	OTU524	0	0	0	2	2	2	2	2	0	8	5	7	30
d__Bacteria	k__norank_d__Bacteria	p__Proteobacteria	c__Alphaproteobacteria	o__Rhodospirillales	f__MSB-1E8	g__norank_f__MSB-1E8	s__uncultured_bacterium_g__norank_f__MSB-1E8	OTU119	4	3	3	7	6	9	14	8	9	1	1	1	66
d__Bacteria	k__norank_d__Bacteria	p__Actinobacteria	c__Actinobacteria	o__Acidimicrobiales	f__unclassified_o__Acidimicrobiales	g__unclassified_o__Acidimicrobiales	s__unclassified_o__Acidimicrobiales	OTU527	2	0	1	1	2	0	7	0	2	27	5	17	64
d__Bacteria	k__norank_d__Bacteria	p__Planctomycetes	c__Planctomycetacia	o__Planctomycetales	f__Planctomycetaceae	g__norank_f__Planctomycetaceae	s__uncultured_bacterium_g__norank_f__Planctomycetaceae	OTU901	0	0	1	0	0	0	0	0	1	2	4	2	10
d__Bacteria	k__norank_d__Bacteria	p__Proteobacteria	c__Alphaproteobacteria	o__Rhodospirillales	f__Acetobacteraceae	g__Craurococcus	s__unclassified_g__Craurococcus	OTU2039	2	0	0	5	2	0	5	3	2	11	3	5	38
d__Bacteria	k__norank_d__Bacteria	p__Chloroflexi	c__Chloroflexia	o__Kallotenuales	f__AKIW781	g__norank_f__AKIW781	s__uncultured_bacterium_g__norank_f__AKIW781	OTU1201	1	0	0	0	2	0	0	7	4	0	0	0	14
d__Bacteria	k__norank_d__Bacteria	p__unclassified_k__norank_d__Bacteria	c__unclassified_k__norank_d__Bacteria	o__unclassified_k__norank_d__Bacteria	f__unclassified_k__norank_d__Bacteria	g__unclassified_k__norank_d__Bacteria	s__unclassified_k__norank_d__Bacteria	OTU3243	6	1	1	0	4	0	6	14	5	0	0	0	37
d__Bacteria	k__norank_d__Bacteria	p__Actinobacteria	c__Actinobacteria	o__Gaiellales	f__Gaiellaceae	g__Gaiella	s__unclassified_g__Gaiella	OTU917	3	4	0	8	3	12	8	7	10	34	14	28	131
d__Bacteria	k__norank_d__Bacteria	p__Nitrospirae	c__Nitrospira	o__norank_c__Nitrospira	f__norank_c__Nitrospira	g__Nitrospira	s__Nitrospira_japonica	OTU2793	163	102	74	66	117	122	163	73	75	16	4	8	983
d__Bacteria	k__norank_d__Bacteria	p__Planctomycetes	c__Planctomycetacia	o__Planctomycetales	f__Planctomycetaceae	g__norank_f__Planctomycetaceae	s__uncultured_bacterium_g__norank_f__Planctomycetaceae	OTU1284	6	7	0	14	4	0	10	12	7	1	0	0	61
d__Bacteria	k__norank_d__Bacteria	p__Planctomycetes	c__Planctomycetacia	o__Planctomycetales	f__Planctomycetaceae	g__Pirellula	s__unclassified_g__Pirellula	OTU964	3	4	0	2	1	0	2	3	2	1	0	0	18
d__Bacteria	k__norank_d__Bacteria	p__Gemmatimonadetes	c__Gemmatimonadetes	o__Gemmatimonadales	f__Gemmatimonadaceae	g__norank_f__Gemmatimonadaceae	s__uncultured_Gemmatimonadetes_bacterium_g__norank_f__Gemmatimonadaceae	OTU1954	18	30	18	49	67	21	48	17	18	0	0	0	286
d__Bacteria	k__norank_d__Bacteria	p__Planctomycetes	c__Planctomycetacia	o__Planctomycetales	f__Planctomycetaceae	g__norank_f__Planctomycetaceae	s__uncultured_Zavarzinella_sp._g__norank	OTU1961	11	5	4	2	1	0	7	6	1	0	0	0	37
d__Bacteria	k__norank_d__Bacteria	p__Tectomicrobia	c__Tectomicrobia_Incertae_Sedis	o__Unknown_Order_c__Tectomicrobia_Incertae_Sedis	f__Unknown_Family_o__Unknown_Order_c__Tectomicrobia_Incertae_Sedis	g__Candidatus_Entotheonella	s__uncultured_bacterium_g__Candidatus_Entotheonella	OTU1366	13	4	3	10	7	7	34	23	8	4	4	10	127
d__Bacteria	k__norank_d__Bacteria	p__Chloroflexi	c__Chloroflexia	o__Kallotenuales	f__AKIW781	g__norank_f__AKIW781	s__uncultured_bacterium_g__norank_f__AKIW781	OTU134	5	0	0	1	3	0	1	6	1	0	0	0	17
d__Bacteria	k__norank_d__Bacteria	p__Proteobacteria	c__Alphaproteobacteria	o__Rhodospirillales	f__Rhodospirillales_Incertae_Sedis	g__Candidatus_Alysiosphaera	s__uncultured_bacterium_g__Candidatus_Alysiosphaera	OTU3112	0	0	0	1	1	1	0	0	1	1	0	0	5
d__Bacteria	k__norank_d__Bacteria	p__Proteobacteria	c__Betaproteobacteria	o__TRA3-20	f__norank_o__TRA3-20	g__norank_o__TRA3-20	s__unclassified_g__norank_o__TRA3-20	OTU4	25	27	41	21	19	40	15	2	5	7	1	2	205
d__Bacteria	k__norank_d__Bacteria	p__Proteobacteria	c__Alphaproteobacteria	o__Rhodobacterales	f__Rhodobacteraceae	g__Rubellimicrobium	s__uncultured_bacterium_g__Rubellimicrobium	OTU2361	39	17	46	51	58	37	75	31	22	189	81	105	751
d__Bacteria	k__norank_d__Bacteria	p__Firmicutes	c__Bacilli	o__Bacillales	f__Bacillaceae	g__Bacillus	s__unclassified_g__Bacillus	OTU2518	11	11	5	26	35	25	19	14	6	0	0	0	152
d__Bacteria	k__norank_d__Bacteria	p__Chloroflexi	c__Thermomicrobia	o__JG30-KF-CM45	f__norank_o__JG30-KF-CM45	g__norank_o__JG30-KF-CM45	s__unclassified_g__norank_o__JG30-KF-CM45	OTU272	1	2	0	0	1	1	0	1	1	1	0	0	8
d__Bacteria	k__norank_d__Bacteria	p__Chloroflexi	c__TK10	o__norank_c__TK10	f__norank_c__TK10	g__norank_c__TK10	s__uncultured_bacterium_g__norank_c__TK10	OTU397	24	17	10	22	26	10	36	27	17	0	0	0	189
d__Bacteria	k__norank_d__Bacteria	p__Planctomycetes	c__Planctomycetacia	o__Planctomycetales	f__Planctomycetaceae	g__Gemmata	s__uncultured_bacterium_g__Gemmata	OTU1259	5	6	1	3	6	0	11	6	5	0	0	0	43
d__Bacteria	k__norank_d__Bacteria	p__Proteobacteria	c__Deltaproteobacteria	o__Myxococcales	f__unclassified_o__Myxococcales	g__unclassified_o__Myxococcales	s__unclassified_o__Myxococcales	OTU222	4	3	0	15	6	5	3	6	0	1	0	0	43
d__Bacteria	k__norank_d__Bacteria	p__Chloroflexi	c__Chloroflexia	o__Chloroflexales	f__Roseiflexaceae	g__Roseiflexus	s__uncultured_bacterium_g__Roseiflexus	OTU1034	3	4	2	1	1	0	6	1	2	0	0	0	20
d__Bacteria	k__norank_d__Bacteria	p__Planctomycetes	c__Phycisphaerae	o__Tepidisphaerales	f__Tepidisphaeraceae	g__norank_f__Tepidisphaeraceae	s__uncultured_bacterium_g__norank_f__Tepidisphaeraceae	OTU1299	1	2	0	1	2	0	0	1	1	2	1	0	11
d__Bacteria	k__norank_d__Bacteria	p__Actinobacteria	c__Actinobacteria	o__Solirubrobacterales	f__Solirubrobacteraceae	g__Solirubrobacter	s__unclassified_g__Solirubrobacter	OTU755	8	7	3	21	11	18	10	12	10	55	29	24	208
d__Bacteria	k__norank_d__Bacteria	p__unclassified_k__norank_d__Bacteria	c__unclassified_k__norank_d__Bacteria	o__unclassified_k__norank_d__Bacteria	f__unclassified_k__norank_d__Bacteria	g__unclassified_k__norank_d__Bacteria	s__unclassified_k__norank_d__Bacteria	OTU250	3	0	1	1	1	1	2	3	0	1	0	2	15
d__Bacteria	k__norank_d__Bacteria	p__unclassified_k__norank_d__Bacteria	c__unclassified_k__norank_d__Bacteria	o__unclassified_k__norank_d__Bacteria	f__unclassified_k__norank_d__Bacteria	g__unclassified_k__norank_d__Bacteria	s__unclassified_k__norank_d__Bacteria	OTU251	2	1	1	0	0	0	0	0	0	0	0	0	4
d__Bacteria	k__norank_d__Bacteria	p__Chloroflexi	c__TK10	o__norank_c__TK10	f__norank_c__TK10	g__norank_c__TK10	s__unclassified_g__norank_c__TK10	OTU2092	4	4	9	19	15	17	8	11	6	0	2	1	96
d__Bacteria	k__norank_d__Bacteria	p__Proteobacteria	c__Deltaproteobacteria	o__Myxococcales	f__norank_o__Myxococcales	g__norank_o__Myxococcales	s__uncultured_delta_proteobacterium_g__norank_o__Myxococcales	OTU634	0	0	1	0	0	0	0	0	0	3	1	0	5
d__Bacteria	k__norank_d__Bacteria	p__Chloroflexi	c__SBR2076	o__norank_c__SBR2076	f__norank_c__SBR2076	g__norank_c__SBR2076	s__uncultured_bacterium_UASB_TL14	OTU1661	6	0	1	0	5	0	18	8	6	0	0	0	44
d__Bacteria	k__norank_d__Bacteria	p__Proteobacteria	c__Gammaproteobacteria	o__Legionellales	f__Coxiellaceae	g__Aquicella	s__unclassified_g__Aquicella	OTU152	2	2	0	1	3	1	0	3	0	0	0	0	12
d__Bacteria	k__norank_d__Bacteria	p__Fibrobacteres	c__Fibrobacteria	o__Fibrobacterales	f__Fibrobacteraceae	g__possible_genus_04	s__uncultured_bacterium_g__possible_genus_04	OTU3283	1	1	1	1	3	0	0	1	0	0	0	0	8
d__Bacteria	k__norank_d__Bacteria	p__Planctomycetes	c__Planctomycetacia	o__Planctomycetales	f__Planctomycetaceae	g__norank_f__Planctomycetaceae	s__unclassified_g__norank_f__Planctomycetaceae	OTU3146	0	0	2	2	0	0	0	0	0	0	0	0	4
d__Bacteria	k__norank_d__Bacteria	p__Proteobacteria	c__Alphaproteobacteria	o__Rhizobiales	f__Phyllobacteriaceae	g__Mesorhizobium	s__unclassified_g__Mesorhizobium	OTU1254	25	20	20	46	27	53	32	42	29	73	50	67	484
d__Bacteria	k__norank_d__Bacteria	p__Acidobacteria	c__Acidobacteria	o__Subgroup_10	f__Sva0725	g__norank_f__Sva0725	s__unclassified_g__norank_f__Sva0725	OTU2271	15	19	9	38	10	12	59	13	14	2	7	4	202
d__Bacteria	k__norank_d__Bacteria	p__Actinobacteria	c__Actinobacteria	o__Corynebacteriales	f__Mycobacteriaceae	g__Mycobacterium	s__unclassified_g__Mycobacterium	OTU806	13	2	6	5	12	9	12	7	8	72	59	37	242
d__Bacteria	k__norank_d__Bacteria	p__Proteobacteria	c__Gammaproteobacteria	o__Xanthomonadales	f__norank_o__Xanthomonadales	g__norank_o__Xanthomonadales	s__uncultured_Ectothiorhodospiraceae_bacterium_g__norank_o__Xanthomonadales	OTU494	0	2	0	1	2	4	0	0	0	1	2	0	12
d__Bacteria	k__norank_d__Bacteria	p__Planctomycetes	c__Phycisphaerae	o__Phycisphaerales	f__Phycisphaeraceae	g__AKYG587	s__uncultured_bacterium_g__AKYG587	OTU1012	2	0	0	1	3	0	2	3	4	0	0	0	15
d__Bacteria	k__norank_d__Bacteria	p__Tectomicrobia	c__Tectomicrobia_Incertae_Sedis	o__Unknown_Order_c__Tectomicrobia_Incertae_Sedis	f__Unknown_Family_o__Unknown_Order_c__Tectomicrobia_Incertae_Sedis	g__Candidatus_Entotheonella	s__unclassified_g__Candidatus_Entotheonella	OTU200	21	9	5	11	19	11	47	21	21	6	5	2	178
d__Bacteria	k__norank_d__Bacteria	p__Actinobacteria	c__Actinobacteria	o__Acidimicrobiales	f__norank_o__Acidimicrobiales	g__norank_o__Acidimicrobiales	s__unclassified_g__norank_o__Acidimicrobiales	OTU667	0	0	0	0	0	0	0	0	0	9	3	7	19
d__Bacteria	k__norank_d__Bacteria	p__Planctomycetes	c__Phycisphaerae	o__Tepidisphaerales	f__Tepidisphaeraceae	g__norank_f__Tepidisphaeraceae	s__uncultured_planctomycete_g__norank_f__Tepidisphaeraceae	OTU1523	0	1	1	3	1	0	2	2	2	0	0	0	12
d__Bacteria	k__norank_d__Bacteria	p__Chloroflexi	c__Chloroflexia	o__Kallotenuales	f__AKIW781	g__norank_f__AKIW781	s__unclassified_g__norank_f__AKIW781	OTU2708	12	7	3	12	4	4	18	26	7	2	0	2	97
d__Bacteria	k__norank_d__Bacteria	p__Proteobacteria	c__Alphaproteobacteria	o__Rhizobiales	f__Phyllobacteriaceae	g__Mesorhizobium	s__unclassified_g__Mesorhizobium	OTU2693	55	24	43	71	48	89	98	67	33	134	72	66	800
d__Bacteria	k__norank_d__Bacteria	p__Acidobacteria	c__Acidobacteria	o__norank_c__Acidobacteria	f__norank_c__Acidobacteria	g__norank_c__Acidobacteria	s__unclassified_g__norank_c__Acidobacteria	OTU160	18	5	3	1	4	1	5	9	2	0	0	1	49
d__Bacteria	k__norank_d__Bacteria	p__Actinobacteria	c__Actinobacteria	o__norank_c__Actinobacteria	f__norank_c__Actinobacteria	g__norank_c__Actinobacteria	s__unclassified_g__norank_c__Actinobacteria	OTU578	2	0	0	0	0	1	0	0	0	10	1	5	19
d__Bacteria	k__norank_d__Bacteria	p__Gemmatimonadetes	c__Gemmatimonadetes	o__Gemmatimonadales	f__Gemmatimonadaceae	g__unclassified_f__Gemmatimonadaceae	s__unclassified_f__Gemmatimonadaceae	OTU970	3	0	0	1	4	2	1	1	1	1	0	2	16
d__Bacteria	k__norank_d__Bacteria	p__Proteobacteria	c__Alphaproteobacteria	o__Sphingomonadales	f__Sphingomonadaceae	g__Sphingomonas	s__unclassified_g__Sphingomonas	OTU739	1	0	5	3	3	1	1	1	1	78	46	61	201
d__Bacteria	k__norank_d__Bacteria	p__Proteobacteria	c__Deltaproteobacteria	o__Myxococcales	f__Haliangiaceae	g__Haliangium	s__unclassified_g__Haliangium	OTU1992	2	0	2	5	4	1	8	3	2	0	0	0	27
d__Bacteria	k__norank_d__Bacteria	p__Chloroflexi	c__TK10	o__norank_c__TK10	f__norank_c__TK10	g__norank_c__TK10	s__unclassified_g__norank_c__TK10	OTU2786	69	36	15	58	67	27	60	123	44	15	6	11	531
d__Bacteria	k__norank_d__Bacteria	p__Verrucomicrobia	c__Verrucomicrobiae	o__Verrucomicrobiales	f__Verrucomicrobiaceae	g__Roseimicrobium	s__uncultured_bacterium_g__Roseimicrobium	OTU1519	0	2	0	2	1	0	3	1	1	0	2	0	12
d__Bacteria	k__norank_d__Bacteria	p__Proteobacteria	c__Gammaproteobacteria	o__Salinisphaerales	f__Salinisphaeraceae	g__norank_f__Salinisphaeraceae	s__uncultured_bacterium_g__norank_f__Salinisphaeraceae	OTU740	6	1	1	3	2	8	1	4	2	12	10	11	61
d__Bacteria	k__norank_d__Bacteria	p__Acidobacteria	c__Acidobacteria	o__norank_c__Acidobacteria	f__norank_c__Acidobacteria	g__norank_c__Acidobacteria	s__unclassified_g__norank_c__Acidobacteria	OTU2551	90	62	54	131	22	6	57	38	40	4	4	4	512
d__Bacteria	k__norank_d__Bacteria	p__Bacteroidetes	c__Sphingobacteriia	o__Sphingobacteriales	f__env.OPS_17	g__norank_f__env.OPS_17	s__uncultured_bacterium_g__norank_f__env.OPS_17	OTU1245	0	0	0	0	2	0	1	1	0	0	0	0	4
d__Bacteria	k__norank_d__Bacteria	p__Chloroflexi	c__Caldilineae	o__Caldilineales	f__Caldilineaceae	g__norank_f__Caldilineaceae	s__uncultured_bacterium_g__norank_f__Caldilineaceae	OTU1262	0	1	2	2	2	2	0	1	0	2	0	1	13
d__Bacteria	k__norank_d__Bacteria	p__Proteobacteria	c__Alphaproteobacteria	o__Caulobacterales	f__Caulobacteraceae	g__Phenylobacterium	s__unclassified_g__Phenylobacterium	OTU1845	4	3	2	7	3	2	12	3	6	15	1	3	61
d__Bacteria	k__norank_d__Bacteria	p__Bacteroidetes	c__Sphingobacteriia	o__Sphingobacteriales	f__Chitinophagaceae	g__norank_f__Chitinophagaceae	s__uncultured_Bacteroidetes_bacterium_g__norank_f__Chitinophagaceae	OTU3066	0	0	3	3	1	1	0	2	0	0	2	1	13
d__Bacteria	k__norank_d__Bacteria	p__Proteobacteria	c__Alphaproteobacteria	o__Rhodospirillales	f__Acetobacteraceae	g__Craurococcus	s__unclassified_g__Craurococcus	OTU2926	1	0	0	2	2	1	1	0	0	0	0	0	7
d__Bacteria	k__norank_d__Bacteria	p__Actinobacteria	c__Actinobacteria	o__Micromonosporales	f__Micromonosporaceae	g__unclassified_f__Micromonosporaceae	s__unclassified_f__Micromonosporaceae	OTU483	10	3	2	7	4	8	6	11	3	6	4	1	65
d__Bacteria	k__norank_d__Bacteria	p__Chloroflexi	c__Ardenticatenia	o__norank_c__Ardenticatenia	f__norank_c__Ardenticatenia	g__norank_c__Ardenticatenia	s__unclassified_g__norank_c__Ardenticatenia	OTU336	1	4	0	0	3	0	0	1	0	0	0	0	9
d__Bacteria	k__norank_d__Bacteria	p__Actinobacteria	c__Actinobacteria	o__Acidimicrobiales	f__unclassified_o__Acidimicrobiales	g__unclassified_o__Acidimicrobiales	s__unclassified_o__Acidimicrobiales	OTU3176	1	2	0	2	1	1	2	2	2	0	0	0	13
d__Bacteria	k__norank_d__Bacteria	p__Gemmatimonadetes	c__Gemmatimonadetes	o__Gemmatimonadales	f__Gemmatimonadaceae	g__norank_f__Gemmatimonadaceae	s__unclassified_g__norank_f__Gemmatimonadaceae	OTU1582	4	1	0	0	0	0	2	0	0	0	0	0	7
d__Bacteria	k__norank_d__Bacteria	p__Actinobacteria	c__Actinobacteria	o__Acidimicrobiales	f__unclassified_o__Acidimicrobiales	g__unclassified_o__Acidimicrobiales	s__unclassified_o__Acidimicrobiales	OTU3173	3	2	1	6	3	11	4	3	0	6	2	5	46
d__Bacteria	k__norank_d__Bacteria	p__Chloroflexi	c__unclassified_p__Chloroflexi	o__unclassified_p__Chloroflexi	f__unclassified_p__Chloroflexi	g__unclassified_p__Chloroflexi	s__unclassified_p__Chloroflexi	OTU2761	19	21	12	23	29	18	39	44	34	3	3	0	245
d__Bacteria	k__norank_d__Bacteria	p__Actinobacteria	c__Actinobacteria	o__Solirubrobacterales	f__0319-6M6	g__norank_f__0319-6M6	s__unclassified_g__norank_f__0319-6M6	OTU2648	1	0	0	1	5	2	4	2	2	0	0	0	17
d__Bacteria	k__norank_d__Bacteria	p__Proteobacteria	c__Alphaproteobacteria	o__Rhizobiales	f__JG34-KF-361	g__norank_f__JG34-KF-361	s__uncultured_bacterium_g__norank_f__JG34-KF-361	OTU1379	33	23	21	53	35	52	64	32	25	91	29	33	491
d__Bacteria	k__norank_d__Bacteria	p__Planctomycetes	c__Planctomycetacia	o__Planctomycetales	f__Planctomycetaceae	g__norank_f__Planctomycetaceae	s__unclassified_g__norank_f__Planctomycetaceae	OTU2956	0	0	2	1	2	1	0	0	0	1	0	0	7
d__Bacteria	k__norank_d__Bacteria	p__Planctomycetes	c__Planctomycetacia	o__Planctomycetales	f__Planctomycetaceae	g__Gemmata	s__uncultured_Planctomycetales_bacterium_g__Gemmata	OTU328	1	1	0	2	1	0	2	1	0	1	0	0	9
d__Bacteria	k__norank_d__Bacteria	p__Chloroflexi	c__NLS2-31	o__norank_c__NLS2-31	f__norank_c__NLS2-31	g__norank_c__NLS2-31	s__uncultured_bacterium_g__norank_c__NLS2-31	OTU1843	4	2	1	9	17	3	2	1	0	0	0	0	39
d__Bacteria	k__norank_d__Bacteria	p__Planctomycetes	c__Planctomycetacia	o__Planctomycetales	f__Planctomycetaceae	g__unclassified_f__Planctomycetaceae	s__unclassified_f__Planctomycetaceae	OTU707	1	4	1	2	1	0	0	2	1	1	1	5	19
d__Bacteria	k__norank_d__Bacteria	p__Bacteroidetes	c__Sphingobacteriia	o__Sphingobacteriales	f__Chitinophagaceae	g__norank_f__Chitinophagaceae	s__unclassified_g__norank_f__Chitinophagaceae	OTU553	0	1	0	3	0	2	0	0	0	3	0	1	10
d__Bacteria	k__norank_d__Bacteria	p__Planctomycetes	c__Planctomycetacia	o__Planctomycetales	f__Planctomycetaceae	g__Planctomyces	s__unclassified_g__Planctomyces	OTU3063	0	1	1	3	0	0	0	1	0	0	0	0	6
d__Bacteria	k__norank_d__Bacteria	p__Chloroflexi	c__Chloroflexia	o__Chloroflexales	f__Roseiflexaceae	g__Roseiflexus	s__unclassified_g__Roseiflexus	OTU1331	50	53	20	39	68	27	10	22	6	0	0	0	295
d__Bacteria	k__norank_d__Bacteria	p__Proteobacteria	c__Deltaproteobacteria	o__Oligoflexales	f__Oligoflexaceae	g__norank_f__Oligoflexaceae	s__uncultured_bacterium_g__norank_f__Oligoflexaceae	OTU3208	0	0	0	0	3	0	0	0	0	0	0	0	3
d__Bacteria	k__norank_d__Bacteria	p__Actinobacteria	c__Actinobacteria	o__unclassified_c__Actinobacteria	f__unclassified_c__Actinobacteria	g__unclassified_c__Actinobacteria	s__unclassified_c__Actinobacteria	OTU2110	1	1	0	0	0	0	4	0	1	0	0	0	7
d__Bacteria	k__norank_d__Bacteria	p__Chloroflexi	c__Gitt-GS-136	o__norank_c__Gitt-GS-136	f__norank_c__Gitt-GS-136	g__norank_c__Gitt-GS-136	s__unclassified_g__norank_c__Gitt-GS-136	OTU749	5	1	1	0	1	1	2	2	5	29	12	13	72
d__Bacteria	k__norank_d__Bacteria	p__Actinobacteria	c__Actinobacteria	o__Micrococcales	f__Microbacteriaceae	g__Lysinimonas	s__unclassified_g__Lysinimonas	OTU442	7	134	7	148	167	32	4	3	2	67	95	87	753
d__Bacteria	k__norank_d__Bacteria	p__Firmicutes	c__Bacilli	o__Bacillales	f__Thermoactinomycetaceae	g__Thermoflavimicrobium	s__uncultured_Bacillales_bacterium_g__Thermoflavimicrobium	OTU1125	2	0	0	7	2	3	0	5	12	0	0	0	31
d__Bacteria	k__norank_d__Bacteria	p__Gemmatimonadetes	c__Gemmatimonadetes	o__norank_c__Gemmatimonadetes	f__norank_c__Gemmatimonadetes	g__norank_c__Gemmatimonadetes	s__unclassified_g__norank_c__Gemmatimonadetes	OTU2901	1	1	1	3	3	5	0	0	0	0	2	0	16
d__Bacteria	k__norank_d__Bacteria	p__Firmicutes	c__Clostridia	o__Clostridiales	f__Eubacteriaceae	g__Garciella	s__uncultured_bacterium_g__Garciella	OTU1647	3	1	1	11	3	4	2	3	1	0	0	1	30
d__Bacteria	k__norank_d__Bacteria	p__Gemmatimonadetes	c__Gemmatimonadetes	o__norank_c__Gemmatimonadetes	f__norank_c__Gemmatimonadetes	g__norank_c__Gemmatimonadetes	s__unclassified_g__norank_c__Gemmatimonadetes	OTU2905	0	0	1	0	1	9	0	0	0	11	4	0	26
d__Bacteria	k__norank_d__Bacteria	p__Actinobacteria	c__Actinobacteria	o__Acidimicrobiales	f__unclassified_o__Acidimicrobiales	g__unclassified_o__Acidimicrobiales	s__unclassified_o__Acidimicrobiales	OTU2911	7	5	2	9	14	21	11	12	5	17	1	6	110
d__Bacteria	k__norank_d__Bacteria	p__Proteobacteria	c__Betaproteobacteria	o__Nitrosomonadales	f__Nitrosomonadaceae	g__norank_f__Nitrosomonadaceae	s__uncultured_Burkholderiaceae_bacterium_g__norank_f__Nitrosomonadaceae	OTU2150	54	89	39	159	101	129	72	33	24	20	29	28	777
d__Bacteria	k__norank_d__Bacteria	p__Planctomycetes	c__unclassified_p__Planctomycetes	o__unclassified_p__Planctomycetes	f__unclassified_p__Planctomycetes	g__unclassified_p__Planctomycetes	s__unclassified_p__Planctomycetes	OTU882	1	0	1	1	1	2	2	1	0	0	1	0	10
d__Bacteria	k__norank_d__Bacteria	p__Gemmatimonadetes	c__Gemmatimonadetes	o__Gemmatimonadales	f__Gemmatimonadaceae	g__unclassified_f__Gemmatimonadaceae	s__unclassified_f__Gemmatimonadaceae	OTU1643	4	3	0	3	1	2	16	3	6	0	0	8	46
d__Bacteria	k__norank_d__Bacteria	p__Actinobacteria	c__Actinobacteria	o__Acidimicrobiales	f__unclassified_o__Acidimicrobiales	g__unclassified_o__Acidimicrobiales	s__unclassified_o__Acidimicrobiales	OTU2824	5	3	4	2	1	3	22	2	11	0	0	0	53
d__Bacteria	k__norank_d__Bacteria	p__Planctomycetes	c__Phycisphaerae	o__Tepidisphaerales	f__Tepidisphaeraceae	g__norank_f__Tepidisphaeraceae	s__unclassified_g__norank_f__Tepidisphaeraceae	OTU1455	0	0	0	3	1	1	2	3	0	0	0	0	10
d__Bacteria	k__norank_d__Bacteria	p__Gemmatimonadetes	c__Gemmatimonadetes	o__Gemmatimonadales	f__Gemmatimonadaceae	g__Gemmatirosa	s__uncultured_bacterium_g__Gemmatirosa	OTU1881	2	0	2	1	2	5	9	2	4	10	2	11	50
d__Bacteria	k__norank_d__Bacteria	p__Planctomycetes	c__Planctomycetacia	o__Planctomycetales	f__Planctomycetaceae	g__Gemmata	s__uncultured_bacterium_g__Gemmata	OTU2239	8	0	1	0	0	0	2	0	1	1	0	0	13
d__Bacteria	k__norank_d__Bacteria	p__Proteobacteria	c__Betaproteobacteria	o__SC-I-84	f__norank_o__SC-I-84	g__norank_o__SC-I-84	s__unclassified_g__norank_o__SC-I-84	OTU2748	122	62	80	104	78	113	194	60	43	17	5	6	884
d__Bacteria	k__norank_d__Bacteria	p__Proteobacteria	c__Alphaproteobacteria	o__Rhodospirillales	f__DA111	g__norank_f__DA111	s__unclassified_g__norank_f__DA111	OTU255	2	3	1	7	4	3	8	7	3	0	1	0	39
d__Bacteria	k__norank_d__Bacteria	p__Chloroflexi	c__Chloroflexia	o__Chloroflexales	f__FFCH7168	g__norank_f__FFCH7168	s__uncultured_bacterium_g__norank_f__FFCH7168	OTU1967	5	1	1	5	2	0	3	6	0	0	0	0	23
d__Bacteria	k__norank_d__Bacteria	p__Planctomycetes	c__Planctomycetacia	o__Planctomycetales	f__Planctomycetaceae	g__Gemmata	s__unclassified_g__Gemmata	OTU348	2	1	1	2	0	0	2	3	2	0	0	2	15
d__Bacteria	k__norank_d__Bacteria	p__Proteobacteria	c__Deltaproteobacteria	o__Myxococcales	f__Haliangiaceae	g__Haliangium	s__unclassified_g__Haliangium	OTU2504	0	0	0	0	0	0	5	1	3	0	0	0	9
d__Bacteria	k__norank_d__Bacteria	p__Chloroflexi	c__Anaerolineae	o__Anaerolineales	f__Anaerolineaceae	g__norank_f__Anaerolineaceae	s__unclassified_g__norank_f__Anaerolineaceae	OTU982	2	0	0	3	1	0	4	0	1	0	0	0	11
d__Bacteria	k__norank_d__Bacteria	p__Proteobacteria	c__Alphaproteobacteria	o__Rhodobacterales	f__Rhodobacteraceae	g__unclassified_f__Rhodobacteraceae	s__unclassified_f__Rhodobacteraceae	OTU807	0	3	2	10	5	12	1	3	0	227	174	185	622
d__Bacteria	k__norank_d__Bacteria	p__Acidobacteria	c__Acidobacteria	o__Blastocatellales	f__Blastocatellaceae__Subgroup_4_	g__11-24	s__uncultured_bacterium_g__11-24	OTU391	0	1	1	0	2	0	1	0	0	0	0	0	5
d__Bacteria	k__norank_d__Bacteria	p__Actinobacteria	c__Actinobacteria	o__Solirubrobacterales	f__unclassified_o__Solirubrobacterales	g__unclassified_o__Solirubrobacterales	s__unclassified_o__Solirubrobacterales	OTU1428	7	4	6	8	6	9	16	14	12	6	1	2	91
d__Bacteria	k__norank_d__Bacteria	p__unclassified_k__norank_d__Bacteria	c__unclassified_k__norank_d__Bacteria	o__unclassified_k__norank_d__Bacteria	f__unclassified_k__norank_d__Bacteria	g__unclassified_k__norank_d__Bacteria	s__unclassified_k__norank_d__Bacteria	OTU117	1	1	1	0	0	2	3	9	3	0	0	0	20
d__Bacteria	k__norank_d__Bacteria	p__Firmicutes	c__Bacilli	o__Bacillales	f__Bacillaceae	g__Gracilibacillus	s__Gracilibacillus_dipsosauri	OTU3143	3	2	1	14	4	4	2	6	0	0	0	1	37
d__Bacteria	k__norank_d__Bacteria	p__Elusimicrobia	c__Elusimicrobia	o__MVP-88	f__norank_o__MVP-88	g__norank_o__MVP-88	s__uncultured_bacterium_g__norank_o__MVP-88	OTU1345	0	0	0	0	0	0	0	2	0	0	0	0	2
d__Bacteria	k__norank_d__Bacteria	p__Verrucomicrobia	c__Opitutae	o__Opitutales	f__Opitutaceae	g__Alterococcus	s__uncultured_bacterium_g__Alterococcus	OTU602	0	0	1	1	0	0	1	0	0	4	5	2	14
d__Bacteria	k__norank_d__Bacteria	p__Armatimonadetes	c__norank_p__Armatimonadetes	o__norank_p__Armatimonadetes	f__norank_p__Armatimonadetes	g__norank_p__Armatimonadetes	s__unclassified_g__norank_p__Armatimonadetes	OTU71	3	6	2	2	3	8	2	1	1	1	0	0	29
d__Bacteria	k__norank_d__Bacteria	p__Actinobacteria	c__Actinobacteria	o__Acidimicrobiales	f__unclassified_o__Acidimicrobiales	g__unclassified_o__Acidimicrobiales	s__unclassified_o__Acidimicrobiales	OTU890	0	0	0	0	0	0	0	0	0	12	2	3	17
d__Bacteria	k__norank_d__Bacteria	p__Planctomycetes	c__Phycisphaerae	o__Tepidisphaerales	f__Tepidisphaeraceae	g__norank_f__Tepidisphaeraceae	s__uncultured_planctomycete_g__norank_f__Tepidisphaeraceae	OTU2384	4	1	0	6	0	0	7	2	4	1	0	0	25
d__Bacteria	k__norank_d__Bacteria	p__Actinobacteria	c__Actinobacteria	o__Solirubrobacterales	f__0319-6M6	g__norank_f__0319-6M6	s__unclassified_g__norank_f__0319-6M6	OTU2510	14	8	13	17	8	9	30	12	16	11	4	7	149
d__Bacteria	k__norank_d__Bacteria	p__Acidobacteria	c__Acidobacteria	o__Solibacterales	f__Solibacteraceae__Subgroup_3_	g__Bryobacter	s__unclassified_g__Bryobacter	OTU2099	5	3	5	3	5	3	10	6	1	4	0	0	45
d__Bacteria	k__norank_d__Bacteria	p__Acidobacteria	c__Acidobacteria	o__Subgroup_7	f__norank_o__Subgroup_7	g__norank_o__Subgroup_7	s__unclassified_g__norank_o__Subgroup_7	OTU577	0	0	0	0	1	2	0	0	0	1	0	2	6
d__Bacteria	k__norank_d__Bacteria	p__Proteobacteria	c__Alphaproteobacteria	o__unclassified_c__Alphaproteobacteria	f__unclassified_c__Alphaproteobacteria	g__unclassified_c__Alphaproteobacteria	s__unclassified_c__Alphaproteobacteria	OTU2883	0	0	2	3	4	6	1	2	4	0	0	0	22
d__Bacteria	k__norank_d__Bacteria	p__Planctomycetes	c__Phycisphaerae	o__Tepidisphaerales	f__Tepidisphaeraceae	g__norank_f__Tepidisphaeraceae	s__uncultured_bacterium_g__norank_f__Tepidisphaeraceae	OTU3060	3	1	0	4	1	0	0	1	1	0	0	0	11
d__Bacteria	k__norank_d__Bacteria	p__Chloroflexi	c__Chloroflexia	o__Chloroflexales	f__Roseiflexaceae	g__Roseiflexus	s__uncultured_bacterium_g__Roseiflexus	OTU2210	95	66	37	81	90	33	147	113	80	1	1	0	744
d__Bacteria	k__norank_d__Bacteria	p__Chloroflexi	c__TK10	o__norank_c__TK10	f__norank_c__TK10	g__norank_c__TK10	s__Chloroflexi_bacterium_OLB14	OTU985	0	0	0	0	1	1	1	0	1	2	0	0	6
d__Bacteria	k__norank_d__Bacteria	p__Firmicutes	c__Bacilli	o__Bacillales	f__Bacillaceae	g__Bacillus	s__unclassified_g__Bacillus	OTU2228	70	39	17	43	40	34	85	46	48	3	2	1	428
d__Bacteria	k__norank_d__Bacteria	p__Actinobacteria	c__Actinobacteria	o__unclassified_c__Actinobacteria	f__unclassified_c__Actinobacteria	g__unclassified_c__Actinobacteria	s__unclassified_c__Actinobacteria	OTU621	0	0	0	0	1	1	4	0	1	11	3	10	31
d__Bacteria	k__norank_d__Bacteria	p__Planctomycetes	c__BD7-11	o__norank_c__BD7-11	f__norank_c__BD7-11	g__norank_c__BD7-11	s__uncultured_Planctomycetaceae_bacterium_g__norank_c__BD7-11	OTU3279	4	1	2	0	2	0	1	2	0	0	1	1	14
d__Bacteria	k__norank_d__Bacteria	p__Actinobacteria	c__Actinobacteria	o__Streptosporangiales	f__Streptosporangiaceae	g__unclassified_f__Streptosporangiaceae	s__unclassified_f__Streptosporangiaceae	OTU1743	9	9	3	20	20	6	6	4	2	0	1	0	80
d__Bacteria	k__norank_d__Bacteria	p__Chloroflexi	c__Anaerolineae	o__Anaerolineales	f__Anaerolineaceae	g__norank_f__Anaerolineaceae	s__uncultured_Gemmatimonadetes_bacterium_g__norank_f__Anaerolineaceae	OTU463	6	8	3	5	5	2	2	1	3	0	0	0	35
d__Bacteria	k__norank_d__Bacteria	p__Actinobacteria	c__Actinobacteria	o__Acidimicrobiales	f__unclassified_o__Acidimicrobiales	g__unclassified_o__Acidimicrobiales	s__unclassified_o__Acidimicrobiales	OTU940	2	0	4	5	2	5	9	2	2	12	7	18	68
d__Bacteria	k__norank_d__Bacteria	p__Armatimonadetes	c__norank_p__Armatimonadetes	o__norank_p__Armatimonadetes	f__norank_p__Armatimonadetes	g__norank_p__Armatimonadetes	s__uncultured_bacterium_g__norank_p__Armatimonadetes	OTU372	0	1	0	2	1	0	1	3	0	0	0	0	8
d__Bacteria	k__norank_d__Bacteria	p__Proteobacteria	c__Alphaproteobacteria	o__Sphingomonadales	f__Erythrobacteraceae	g__Altererythrobacter	s__Altererythrobacter_troitsensis	OTU587	1	2	1	2	1	5	1	1	0	27	13	25	79
d__Bacteria	k__norank_d__Bacteria	p__unclassified_k__norank_d__Bacteria	c__unclassified_k__norank_d__Bacteria	o__unclassified_k__norank_d__Bacteria	f__unclassified_k__norank_d__Bacteria	g__unclassified_k__norank_d__Bacteria	s__unclassified_k__norank_d__Bacteria	OTU2426	70	6	15	16	14	7	4	3	3	0	0	0	138
d__Bacteria	k__norank_d__Bacteria	p__Bacteroidetes	c__Cytophagia	o__Cytophagales	f__Cytophagaceae	g__Adhaeribacter	s__unclassified_g__Adhaeribacter	OTU3216	2	1	0	0	2	0	4	0	0	0	0	0	9
d__Bacteria	k__norank_d__Bacteria	p__Acidobacteria	c__Acidobacteria	o__norank_c__Acidobacteria	f__norank_c__Acidobacteria	g__norank_c__Acidobacteria	s__Acidobacteria_bacterium_CB_286306	OTU249	272	131	82	34	82	5	106	108	89	33	19	15	976
d__Bacteria	k__norank_d__Bacteria	p__Proteobacteria	c__Gammaproteobacteria	o__unclassified_c__Gammaproteobacteria	f__unclassified_c__Gammaproteobacteria	g__unclassified_c__Gammaproteobacteria	s__unclassified_c__Gammaproteobacteria	OTU2123	0	0	0	1	0	1	3	7	0	0	0	0	12
d__Bacteria	k__norank_d__Bacteria	p__Armatimonadetes	c__norank_p__Armatimonadetes	o__norank_p__Armatimonadetes	f__norank_p__Armatimonadetes	g__norank_p__Armatimonadetes	s__unclassified_g__norank_p__Armatimonadetes	OTU994	1	2	1	2	1	0	1	3	3	2	2	0	18
d__Bacteria	k__norank_d__Bacteria	p__Bacteroidetes	c__Sphingobacteriia	o__Sphingobacteriales	f__env.OPS_17	g__norank_f__env.OPS_17	s__uncultured_bacterium_g__norank_f__env.OPS_17	OTU2301	0	0	0	0	1	0	9	0	0	0	0	0	10
d__Bacteria	k__norank_d__Bacteria	p__Bacteroidetes	c__Cytophagia	o__Cytophagales	f__Cytophagaceae	g__norank_f__Cytophagaceae	s__uncultured_Flexibacter_sp._g__norank_f__Cytophagaceae	OTU2261	0	0	0	0	0	0	7	0	1	0	0	0	8
d__Bacteria	k__norank_d__Bacteria	p__Proteobacteria	c__Gammaproteobacteria	o__Legionellales	f__Coxiellaceae	g__Coxiella	s__unclassified_g__Coxiella	OTU699	0	0	0	0	0	0	0	0	0	0	0	9	9
d__Bacteria	k__norank_d__Bacteria	p__Planctomycetes	c__Phycisphaerae	o__Phycisphaerales	f__Phycisphaeraceae	g__SM1A02	s__uncultured_bacterium_g__SM1A02	OTU1539	3	0	2	2	6	0	9	8	2	0	0	0	32
d__Bacteria	k__norank_d__Bacteria	p__Planctomycetes	c__Phycisphaerae	o__Tepidisphaerales	f__Tepidisphaeraceae	g__norank_f__Tepidisphaeraceae	s__unclassified_g__norank_f__Tepidisphaeraceae	OTU2230	4	2	0	17	4	0	16	8	3	0	1	0	55
d__Bacteria	k__norank_d__Bacteria	p__Proteobacteria	c__Gammaproteobacteria	o__Xanthomonadales	f__Xanthomonadales_Incertae_Sedis	g__norank_f__Xanthomonadales_Incertae_Sedis	s__unclassified_g__norank_f__Xanthomonadales_Incertae_Sedis	OTU2023	0	0	1	0	2	0	1	0	0	0	0	0	4
d__Bacteria	k__norank_d__Bacteria	p__Proteobacteria	c__Alphaproteobacteria	o__Rhizobiales	f__unclassified_o__Rhizobiales	g__unclassified_o__Rhizobiales	s__unclassified_o__Rhizobiales	OTU596	3	2	2	8	9	6	14	5	1	5	1	4	60
d__Bacteria	k__norank_d__Bacteria	p__Planctomycetes	c__Phycisphaerae	o__Phycisphaerales	f__Phycisphaeraceae	g__AKYG587	s__uncultured_bacterium_g__AKYG587	OTU1761	3	1	1	3	2	0	5	3	3	0	0	0	21
d__Bacteria	k__norank_d__Bacteria	p__Chloroflexi	c__Caldilineae	o__Caldilineales	f__Caldilineaceae	g__Litorilinea	s__uncultured_bacterium_g__Litorilinea	OTU1530	2	3	3	24	1	9	8	3	4	0	0	5	62
d__Bacteria	k__norank_d__Bacteria	p__Proteobacteria	c__Betaproteobacteria	o__Nitrosomonadales	f__Nitrosomonadaceae	g__norank_f__Nitrosomonadaceae	s__unclassified_g__norank_f__Nitrosomonadaceae	OTU950	3	4	2	14	8	8	8	6	5	4	3	1	66
d__Bacteria	k__norank_d__Bacteria	p__Chloroflexi	c__TK10	o__norank_c__TK10	f__norank_c__TK10	g__norank_c__TK10	s__uncultured_gamma_proteobacterium_g__norank_c__TK10	OTU168	2	1	1	5	2	0	0	0	0	2	0	6	19
d__Bacteria	k__norank_d__Bacteria	p__Verrucomicrobia	c__OPB35_soil_group	o__norank_c__OPB35_soil_group	f__norank_c__OPB35_soil_group	g__norank_c__OPB35_soil_group	s__unclassified_g__norank_c__OPB35_soil_group	OTU1758	0	0	0	0	0	0	2	0	0	0	0	0	2
d__Bacteria	k__norank_d__Bacteria	p__Chloroflexi	c__Chloroflexia	o__Kallotenuales	f__AKIW781	g__norank_f__AKIW781	s__uncultured_soil_bacterium_g__norank_f__AKIW781	OTU1031	5	0	0	0	0	1	2	2	2	4	0	0	16
d__Bacteria	k__norank_d__Bacteria	p__Planctomycetes	c__Planctomycetacia	o__Planctomycetales	f__Planctomycetaceae	g__norank_f__Planctomycetaceae	s__unclassified_g__norank_f__Planctomycetaceae	OTU395	11	2	3	0	2	0	2	1	2	0	0	0	23
d__Bacteria	k__norank_d__Bacteria	p__Acidobacteria	c__Acidobacteria	o__norank_c__Acidobacteria	f__norank_c__Acidobacteria	g__norank_c__Acidobacteria	s__unclassified_g__norank_c__Acidobacteria	OTU1759	39	29	19	129	28	4	10	14	13	9	2	4	300
d__Bacteria	k__norank_d__Bacteria	p__Actinobacteria	c__Actinobacteria	o__Micromonosporales	f__Micromonosporaceae	g__Catellatospora	s__Catellatospora_citrea	OTU2527	27	15	16	84	31	40	84	41	48	33	21	73	513
d__Bacteria	k__norank_d__Bacteria	p__Bacteroidetes	c__Cytophagia	o__Cytophagales	f__Cytophagaceae	g__Rhodocytophaga	s__uncultured_Bacteroidetes_bacterium_g__Rhodocytophaga	OTU1626	4	2	8	3	9	5	11	14	5	11	2	5	79
d__Bacteria	k__norank_d__Bacteria	p__Gemmatimonadetes	c__Gemmatimonadetes	o__Gemmatimonadales	f__Gemmatimonadaceae	g__norank_f__Gemmatimonadaceae	s__uncultured_bacterium_g__norank_f__Gemmatimonadaceae	OTU387	7	5	1	8	2	3	5	1	5	2	0	2	41
d__Bacteria	k__norank_d__Bacteria	p__Proteobacteria	c__Gammaproteobacteria	o__Xanthomonadales	f__Xanthomonadaceae	g__unclassified_f__Xanthomonadaceae	s__unclassified_f__Xanthomonadaceae	OTU1636	14	74	9	51	90	67	2	4	1	37	23	12	384
d__Bacteria	k__norank_d__Bacteria	p__Bacteroidetes	c__Cytophagia	o__Cytophagales	f__Cytophagaceae	g__Pontibacter	s__unclassified_g__Pontibacter	OTU2234	19	27	12	35	50	30	25	17	9	0	1	0	225
d__Bacteria	k__norank_d__Bacteria	p__Actinobacteria	c__Actinobacteria	o__Acidimicrobiales	f__Acidimicrobiales_Incertae_Sedis	g__Aciditerrimonas	s__uncultured_Aciditerrimonas_sp._g__Aciditerrimonas	OTU1085	4	1	1	4	2	11	13	4	7	1	0	0	48
d__Bacteria	k__norank_d__Bacteria	p__Chloroflexi	c__TK10	o__norank_c__TK10	f__norank_c__TK10	g__norank_c__TK10	s__unclassified_g__norank_c__TK10	OTU2895	8	3	0	6	6	5	12	16	8	1	0	3	68
d__Bacteria	k__norank_d__Bacteria	p__Chloroflexi	c__unclassified_p__Chloroflexi	o__unclassified_p__Chloroflexi	f__unclassified_p__Chloroflexi	g__unclassified_p__Chloroflexi	s__unclassified_p__Chloroflexi	OTU997	4	5	1	1	5	3	4	7	7	4	2	0	43
d__Bacteria	k__norank_d__Bacteria	p__Actinobacteria	c__Actinobacteria	o__Streptosporangiales	f__Streptosporangiales_Incertae_Sedis	g__Motilibacter	s__uncultured_bacterium_g__Motilibacter	OTU825	1	0	0	0	1	1	1	0	0	9	4	1	18
d__Bacteria	k__norank_d__Bacteria	p__Armatimonadetes	c__norank_p__Armatimonadetes	o__norank_p__Armatimonadetes	f__norank_p__Armatimonadetes	g__norank_p__Armatimonadetes	s__unclassified_g__norank_p__Armatimonadetes	OTU1169	1	2	0	3	10	1	4	2	3	5	0	0	31
d__Bacteria	k__norank_d__Bacteria	p__Chloroflexi	c__unclassified_p__Chloroflexi	o__unclassified_p__Chloroflexi	f__unclassified_p__Chloroflexi	g__unclassified_p__Chloroflexi	s__unclassified_p__Chloroflexi	OTU226	2	0	0	1	0	1	1	1	0	0	0	0	6
d__Bacteria	k__norank_d__Bacteria	p__Planctomycetes	c__Planctomycetacia	o__Planctomycetales	f__Planctomycetaceae	g__Planctomyces	s__uncultured_Planctomycetales_bacterium_g__Planctomyces	OTU511	9	8	5	1	13	0	4	2	3	1	0	0	46
d__Bacteria	k__norank_d__Bacteria	p__Proteobacteria	c__Alphaproteobacteria	o__Sphingomonadales	f__Erythrobacteraceae	g__Altererythrobacter	s__unclassified_g__Altererythrobacter	OTU2945	2	0	0	0	0	5	1	0	0	1	1	1	11
d__Bacteria	k__norank_d__Bacteria	p__Planctomycetes	c__Planctomycetacia	o__Planctomycetales	f__Planctomycetaceae	g__Planctomyces	s__Planctomyces_sp._SCGC_AG-212-M04	OTU1141	7	12	3	29	9	2	9	8	7	5	1	4	96
d__Bacteria	k__norank_d__Bacteria	p__Planctomycetes	c__Planctomycetacia	o__Planctomycetales	f__Planctomycetaceae	g__Planctomyces	s__unclassified_g__Planctomyces	OTU3117	2	2	0	10	0	0	0	0	0	0	0	0	14
d__Bacteria	k__norank_d__Bacteria	p__Verrucomicrobia	c__Opitutae	o__Opitutales	f__Opitutaceae	g__Opitutus	s__uncultured_Verrucomicrobia_bacterium_g__Opitutus	OTU111	3	8	6	1	3	9	12	2	8	2	3	0	57
d__Bacteria	k__norank_d__Bacteria	p__Planctomycetes	c__Planctomycetacia	o__Planctomycetales	f__Planctomycetaceae	g__Gemmata	s__uncultured_Gemmata_sp._g__Gemmata	OTU3102	0	0	0	11	3	0	0	0	0	1	0	0	15
d__Bacteria	k__norank_d__Bacteria	p__Planctomycetes	c__Planctomycetacia	o__Planctomycetales	f__Planctomycetaceae	g__Gemmata	s__uncultured_endolithic_bacterium_g__Gemmata	OTU1898	9	11	4	36	8	0	19	12	9	1	0	3	112
d__Bacteria	k__norank_d__Bacteria	p__Chloroflexi	c__Anaerolineae	o__Anaerolineales	f__Anaerolineaceae	g__norank_f__Anaerolineaceae	s__unclassified_g__norank_f__Anaerolineaceae	OTU1306	5	10	3	3	7	0	3	4	5	2	0	0	42
d__Bacteria	k__norank_d__Bacteria	p__Proteobacteria	c__Deltaproteobacteria	o__Myxococcales	f__Sandaracinaceae	g__norank_f__Sandaracinaceae	s__unclassified_g__norank_f__Sandaracinaceae	OTU2826	4	3	3	8	9	6	7	3	3	6	1	3	56
d__Bacteria	k__norank_d__Bacteria	p__Gemmatimonadetes	c__Gemmatimonadetes	o__norank_c__Gemmatimonadetes	f__norank_c__Gemmatimonadetes	g__norank_c__Gemmatimonadetes	s__unclassified_g__norank_c__Gemmatimonadetes	OTU3188	0	3	2	7	6	6	2	2	0	0	0	0	28
d__Bacteria	k__norank_d__Bacteria	p__Planctomycetes	c__Planctomycetacia	o__Planctomycetales	f__Planctomycetaceae	g__Gemmata	s__unclassified_g__Gemmata	OTU1322	1	3	1	1	3	0	8	5	2	0	0	0	24
d__Bacteria	k__norank_d__Bacteria	p__Chloroflexi	c__unclassified_p__Chloroflexi	o__unclassified_p__Chloroflexi	f__unclassified_p__Chloroflexi	g__unclassified_p__Chloroflexi	s__unclassified_p__Chloroflexi	OTU185	1	0	0	2	2	0	2	0	1	0	0	0	8
d__Bacteria	k__norank_d__Bacteria	p__Proteobacteria	c__Deltaproteobacteria	o__Myxococcales	f__Sandaracinaceae	g__norank_f__Sandaracinaceae	s__uncultured_soil_bacterium_g__norank_f__Sandaracinaceae	OTU2620	2	4	4	8	3	12	4	7	2	12	12	14	84
d__Bacteria	k__norank_d__Bacteria	p__Planctomycetes	c__Planctomycetacia	o__Planctomycetales	f__Planctomycetaceae	g__norank_f__Planctomycetaceae	s__unclassified_g__norank_f__Planctomycetaceae	OTU983	6	6	9	1	5	0	7	6	1	4	1	2	48
d__Bacteria	k__norank_d__Bacteria	p__Bacteroidetes	c__Sphingobacteriia	o__Sphingobacteriales	f__Chitinophagaceae	g__Niastella	s__unclassified_g__Niastella	OTU709	0	7	1	6	4	3	11	3	2	3	2	1	43
d__Bacteria	k__norank_d__Bacteria	p__Planctomycetes	c__Planctomycetacia	o__Planctomycetales	f__Planctomycetaceae	g__norank_f__Planctomycetaceae	s__uncultured_bacterium_g__norank_f__Planctomycetaceae	OTU1346	4	3	1	1	0	0	1	4	1	0	0	0	15
d__Bacteria	k__norank_d__Bacteria	p__Acidobacteria	c__Acidobacteria	o__Subgroup_7	f__norank_o__Subgroup_7	g__norank_o__Subgroup_7	s__uncultured_Acidobacterium_sp._g__norank_o__Subgroup_7	OTU1312	101	83	71	119	90	148	229	76	61	34	9	15	1036
d__Bacteria	k__norank_d__Bacteria	p__Proteobacteria	c__Alphaproteobacteria	o__Rhizobiales	f__Methylobacteriaceae	g__Microvirga	s__unclassified_g__Microvirga	OTU2162	125	88	72	136	106	134	261	143	102	56	22	15	1260
d__Bacteria	k__norank_d__Bacteria	p__Chloroflexi	c__Chloroflexia	o__Chloroflexales	f__Roseiflexaceae	g__Roseiflexus	s__uncultured_Chloroflexi_bacterium_g__Roseiflexus	OTU2579	8	9	4	2	2	0	8	1	6	0	0	0	40
d__Bacteria	k__norank_d__Bacteria	p__Tectomicrobia	c__norank_p__Tectomicrobia	o__norank_p__Tectomicrobia	f__norank_p__Tectomicrobia	g__norank_p__Tectomicrobia	s__unclassified_g__norank_p__Tectomicrobia	OTU1268	0	3	0	1	0	0	2	2	2	0	1	3	14
d__Bacteria	k__norank_d__Bacteria	p__Proteobacteria	c__Deltaproteobacteria	o__Desulfurellales	f__Desulfurellaceae	g__H16	s__unclassified_g__H16	OTU2576	14	7	8	26	9	19	30	17	12	3	2	1	148
d__Bacteria	k__norank_d__Bacteria	p__Armatimonadetes	c__norank_p__Armatimonadetes	o__norank_p__Armatimonadetes	f__norank_p__Armatimonadetes	g__norank_p__Armatimonadetes	s__unclassified_g__norank_p__Armatimonadetes	OTU1179	3	7	3	3	4	3	2	4	4	1	0	0	34
d__Bacteria	k__norank_d__Bacteria	p__Chloroflexi	c__Ardenticatenia	o__Ardenticatenales	f__norank_o__Ardenticatenales	g__norank_o__Ardenticatenales	s__unclassified_g__norank_o__Ardenticatenales	OTU3290	0	1	0	3	5	8	0	0	0	0	0	0	17
d__Bacteria	k__norank_d__Bacteria	p__Planctomycetes	c__Planctomycetacia	o__Planctomycetales	f__Planctomycetaceae	g__Rhodopirellula	s__unclassified_g__Rhodopirellula	OTU619	1	2	2	0	0	0	0	0	0	2	1	0	8
d__Bacteria	k__norank_d__Bacteria	p__Proteobacteria	c__Alphaproteobacteria	o__Rhodospirillales	f__Rhodospirillales_Incertae_Sedis	g__Candidatus_Alysiosphaera	s__uncultured_alpha_proteobacterium_g__Candidatus_Alysiosphaera	OTU228	3	0	0	6	3	3	1	0	1	0	0	0	17
d__Bacteria	k__norank_d__Bacteria	p__Actinobacteria	c__Actinobacteria	o__Propionibacteriales	f__Nocardioidaceae	g__Kribbella	s__unclassified_g__Kribbella	OTU838	1	0	0	1	0	0	1	1	0	10	2	1	17
d__Bacteria	k__norank_d__Bacteria	p__Proteobacteria	c__Gammaproteobacteria	o__Legionellales	f__Legionellaceae	g__Legionella	s__Legionella_donaldsonii	OTU768	0	0	0	0	0	0	0	0	0	3	1	2	6
d__Bacteria	k__norank_d__Bacteria	p__Proteobacteria	c__Gammaproteobacteria	o__Xanthomonadales	f__norank_o__Xanthomonadales	g__norank_o__Xanthomonadales	s__unclassified_g__norank_o__Xanthomonadales	OTU1506	32	47	32	58	33	62	24	27	12	15	14	12	368
d__Bacteria	k__norank_d__Bacteria	p__Tectomicrobia	c__norank_p__Tectomicrobia	o__norank_p__Tectomicrobia	f__norank_p__Tectomicrobia	g__norank_p__Tectomicrobia	s__uncultured_bacterium_g__norank_p__Tectomicrobia	OTU1849	5	1	4	10	3	4	7	7	4	1	0	0	46
d__Bacteria	k__norank_d__Bacteria	p__Proteobacteria	c__Deltaproteobacteria	o__Myxococcales	f__BIrii41	g__norank_f__BIrii41	s__uncultured_delta_proteobacterium_g__norank_f__BIrii41	OTU2155	2	0	6	9	14	6	7	16	5	7	3	3	78
d__Bacteria	k__norank_d__Bacteria	p__Chloroflexi	c__Thermomicrobia	o__AKYG1722	f__norank_o__AKYG1722	g__norank_o__AKYG1722	s__unclassified_g__norank_o__AKYG1722	OTU448	1	2	2	3	2	4	0	0	0	0	0	1	15
d__Bacteria	k__norank_d__Bacteria	p__Actinobacteria	c__Actinobacteria	o__Acidimicrobiales	f__norank_o__Acidimicrobiales	g__norank_o__Acidimicrobiales	s__unclassified_g__norank_o__Acidimicrobiales	OTU1694	0	1	0	6	5	8	6	2	3	37	12	21	101
d__Bacteria	k__norank_d__Bacteria	p__Proteobacteria	c__Deltaproteobacteria	o__Myxococcales	f__mle1-27	g__norank_f__mle1-27	s__unclassified_g__norank_f__mle1-27	OTU2865	1	1	0	0	0	0	1	1	0	0	0	0	4
d__Bacteria	k__norank_d__Bacteria	p__Proteobacteria	c__Alphaproteobacteria	o__Rhodospirillales	f__Rhodospirillaceae	g__Skermanella	s__unclassified_g__Skermanella	OTU317	189	39	122	190	214	213	299	147	121	143	83	230	1990
d__Bacteria	k__norank_d__Bacteria	p__Planctomycetes	c__Planctomycetacia	o__Planctomycetales	f__Planctomycetaceae	g__norank_f__Planctomycetaceae	s__uncultured_forest_soil_bacterium_g__norank_f__Planctomycetaceae	OTU1619	13	2	13	3	5	0	7	2	2	11	1	1	60
d__Bacteria	k__norank_d__Bacteria	p__Actinobacteria	c__Actinobacteria	o__Acidimicrobiales	f__unclassified_o__Acidimicrobiales	g__unclassified_o__Acidimicrobiales	s__unclassified_o__Acidimicrobiales	OTU1101	0	0	0	0	0	1	5	2	2	1	0	0	11
d__Bacteria	k__norank_d__Bacteria	p__Actinobacteria	c__Actinobacteria	o__Micromonosporales	f__Micromonosporaceae	g__Actinoplanes	s__unclassified_g__Actinoplanes	OTU1093	5	5	3	25	15	33	15	9	9	5	4	3	131
d__Bacteria	k__norank_d__Bacteria	p__Proteobacteria	c__Deltaproteobacteria	o__Myxococcales	f__Haliangiaceae	g__Haliangium	s__unclassified_g__Haliangium	OTU1298	1	2	0	0	1	0	8	5	1	0	0	0	18
d__Bacteria	k__norank_d__Bacteria	p__Actinobacteria	c__Actinobacteria	o__Gaiellales	f__unclassified_o__Gaiellales	g__unclassified_o__Gaiellales	s__unclassified_o__Gaiellales	OTU2768	119	30	47	102	79	116	193	130	156	10	6	2	990
d__Bacteria	k__norank_d__Bacteria	p__Proteobacteria	c__Alphaproteobacteria	o__Sphingomonadales	f__Erythrobacteraceae	g__Altererythrobacter	s__uncultured_alpha_proteobacterium_g__Altererythrobacter	OTU3238	3	10	1	1	8	3	3	5	1	7	4	2	48
d__Bacteria	k__norank_d__Bacteria	p__Proteobacteria	c__Deltaproteobacteria	o__Myxococcales	f__unclassified_o__Myxococcales	g__unclassified_o__Myxococcales	s__unclassified_o__Myxococcales	OTU969	2	0	4	13	9	9	5	14	11	2	0	2	71
d__Bacteria	k__norank_d__Bacteria	p__Actinobacteria	c__Actinobacteria	o__norank_c__Actinobacteria	f__norank_c__Actinobacteria	g__norank_c__Actinobacteria	s__unclassified_g__norank_c__Actinobacteria	OTU2334	3	0	0	1	0	0	4	4	1	0	0	0	13
d__Bacteria	k__norank_d__Bacteria	p__Proteobacteria	c__Alphaproteobacteria	o__Caulobacterales	f__Caulobacteraceae	g__Brevundimonas	s__Brevundimonas_alba	OTU802	2	0	3	0	0	2	2	0	1	68	58	52	188
d__Bacteria	k__norank_d__Bacteria	p__Chloroflexi	c__Chloroflexia	o__Kallotenuales	f__AKIW781	g__norank_f__AKIW781	s__unclassified_g__norank_f__AKIW781	OTU1328	3	2	0	2	1	4	3	6	3	12	3	3	42
d__Bacteria	k__norank_d__Bacteria	p__Chloroflexi	c__Chloroflexia	o__Kallotenuales	f__AKIW781	g__norank_f__AKIW781	s__unclassified_g__norank_f__AKIW781	OTU2918	1	2	1	4	4	3	1	0	0	0	0	0	16
d__Bacteria	k__norank_d__Bacteria	p__Planctomycetes	c__Phycisphaerae	o__Tepidisphaerales	f__Tepidisphaeraceae	g__norank_f__Tepidisphaeraceae	s__uncultured_bacterium_g__norank_f__Tepidisphaeraceae	OTU1578	6	9	7	33	3	1	5	3	2	0	0	0	69
d__Bacteria	k__norank_d__Bacteria	p__Gemmatimonadetes	c__Gemmatimonadetes	o__Gemmatimonadales	f__Gemmatimonadaceae	g__unclassified_f__Gemmatimonadaceae	s__unclassified_f__Gemmatimonadaceae	OTU2812	1	1	0	2	0	0	4	3	3	1	0	0	15
d__Bacteria	k__norank_d__Bacteria	p__Planctomycetes	c__Planctomycetacia	o__Planctomycetales	f__Planctomycetaceae	g__Gemmata	s__unclassified_g__Gemmata	OTU2100	8	4	2	0	1	0	4	1	2	2	1	1	26
d__Bacteria	k__norank_d__Bacteria	p__Chloroflexi	c__Chloroflexia	o__Kallotenuales	f__AKIW781	g__norank_f__AKIW781	s__unclassified_g__norank_f__AKIW781	OTU2917	0	0	0	1	1	3	1	0	0	1	0	0	7
d__Bacteria	k__norank_d__Bacteria	p__Proteobacteria	c__Deltaproteobacteria	o__Myxococcales	f__Polyangiaceae	g__unclassified_f__Polyangiaceae	s__unclassified_f__Polyangiaceae	OTU3171	9	11	8	10	15	4	34	8	12	0	3	8	122
d__Bacteria	k__norank_d__Bacteria	p__Proteobacteria	c__Alphaproteobacteria	o__Sphingomonadales	f__Sphingomonadaceae	g__Sphingomonas	s__unclassified_g__Sphingomonas	OTU1273	13	2	7	9	11	41	13	5	5	69	65	30	270
d__Bacteria	k__norank_d__Bacteria	p__Actinobacteria	c__Actinobacteria	o__Solirubrobacterales	f__unclassified_o__Solirubrobacterales	g__unclassified_o__Solirubrobacterales	s__unclassified_o__Solirubrobacterales	OTU939	2	0	0	11	0	4	2	0	2	10	3	0	34
d__Bacteria	k__norank_d__Bacteria	p__Proteobacteria	c__Deltaproteobacteria	o__Myxococcales	f__Phaselicystidaceae	g__Phaselicystis	s__unclassified_g__Phaselicystis	OTU1314	5	3	2	7	4	4	8	5	4	0	1	0	43
d__Bacteria	k__norank_d__Bacteria	p__Proteobacteria	c__Alphaproteobacteria	o__Rhizobiales	f__unclassified_o__Rhizobiales	g__unclassified_o__Rhizobiales	s__unclassified_o__Rhizobiales	OTU2521	5	2	0	6	3	3	10	7	2	35	18	27	118
d__Bacteria	k__norank_d__Bacteria	p__Armatimonadetes	c__norank_p__Armatimonadetes	o__norank_p__Armatimonadetes	f__norank_p__Armatimonadetes	g__norank_p__Armatimonadetes	s__uncultured_Firmicutes_bacterium_g__norank_p__Armatimonadetes	OTU1042	7	7	2	5	2	8	6	4	5	1	2	2	51
d__Bacteria	k__norank_d__Bacteria	p__Proteobacteria	c__Alphaproteobacteria	o__Sphingomonadales	f__Sphingomonadaceae	g__Sphingopyxis	s__unclassified_g__Sphingopyxis	OTU847	0	0	0	5	2	0	0	1	0	4	22	13	47
d__Bacteria	k__norank_d__Bacteria	p__Tectomicrobia	c__Tectomicrobia_Incertae_Sedis	o__Unknown_Order_c__Tectomicrobia_Incertae_Sedis	f__Unknown_Family_o__Unknown_Order_c__Tectomicrobia_Incertae_Sedis	g__Candidatus_Entotheonella	s__uncultured_delta_proteobacterium_g__Candidatus_Entotheonella	OTU146	19	10	12	3	16	8	37	15	6	2	0	2	130
d__Bacteria	k__norank_d__Bacteria	p__Planctomycetes	c__Planctomycetacia	o__Planctomycetales	f__Planctomycetaceae	g__norank_f__Planctomycetaceae	s__unclassified_g__norank_f__Planctomycetaceae	OTU3135	1	1	0	6	0	0	1	0	0	2	0	1	12
d__Bacteria	k__norank_d__Bacteria	p__Bacteroidetes	c__Cytophagia	o__Cytophagales	f__Cytophagaceae	g__Rufibacter	s__uncultured_bacterium_g__Rufibacter	OTU690	1	1	0	0	0	0	2	2	0	5	5	6	22
d__Bacteria	k__norank_d__Bacteria	p__Planctomycetes	c__Phycisphaerae	o__Tepidisphaerales	f__Tepidisphaeraceae	g__norank_f__Tepidisphaeraceae	s__uncultured_planctomycete_g__norank_f__Tepidisphaeraceae	OTU444	1	1	1	1	1	0	0	0	0	0	0	0	5
d__Bacteria	k__norank_d__Bacteria	p__Proteobacteria	c__Betaproteobacteria	o__Nitrosomonadales	f__Nitrosomonadaceae	g__norank_f__Nitrosomonadaceae	s__unclassified_g__norank_f__Nitrosomonadaceae	OTU2815	105	146	82	151	225	137	166	50	64	11	18	12	1167
d__Bacteria	k__norank_d__Bacteria	p__Proteobacteria	c__Betaproteobacteria	o__Nitrosomonadales	f__Nitrosomonadaceae	g__norank_f__Nitrosomonadaceae	s__uncultured_Burkholderiaceae_bacterium_g__norank_f__Nitrosomonadaceae	OTU988	12	3	5	12	11	6	34	9	16	5	2	2	117
d__Bacteria	k__norank_d__Bacteria	p__Gemmatimonadetes	c__Gemmatimonadetes	o__Gemmatimonadales	f__Gemmatimonadaceae	g__Gemmatimonas	s__uncultured_bacterium_g__Gemmatimonas	OTU2019	6	13	4	9	4	3	4	2	2	2	1	0	50
d__Bacteria	k__norank_d__Bacteria	p__Acidobacteria	c__Acidobacteria	o__norank_c__Acidobacteria	f__norank_c__Acidobacteria	g__norank_c__Acidobacteria	s__unclassified_g__norank_c__Acidobacteria	OTU174	12	3	2	0	1	1	5	8	5	4	0	2	43
d__Bacteria	k__norank_d__Bacteria	p__Gemmatimonadetes	c__Gemmatimonadetes	o__Gemmatimonadales	f__Gemmatimonadaceae	g__norank_f__Gemmatimonadaceae	s__Gemmatimonadetes_bacterium_LX87	OTU3260	52	32	32	32	20	21	69	22	31	7	2	6	326
d__Bacteria	k__norank_d__Bacteria	p__Gemmatimonadetes	c__Gemmatimonadetes	o__Gemmatimonadales	f__Gemmatimonadaceae	g__Gemmatimonas	s__uncultured_bacterium_g__Gemmatimonas	OTU2010	3	4	2	5	6	3	7	1	1	0	0	0	32
d__Bacteria	k__norank_d__Bacteria	p__Actinobacteria	c__Actinobacteria	o__Solirubrobacterales	f__unclassified_o__Solirubrobacterales	g__unclassified_o__Solirubrobacterales	s__unclassified_o__Solirubrobacterales	OTU592	0	0	1	4	1	2	3	5	2	25	8	11	62
d__Bacteria	k__norank_d__Bacteria	p__Actinobacteria	c__Actinobacteria	o__Solirubrobacterales	f__Solirubrobacteraceae	g__Solirubrobacter	s__uncultured_Solirubrobacter_sp._g__Solirubrobacter	OTU1590	201	152	160	365	353	298	515	264	301	360	157	192	3318
d__Bacteria	k__norank_d__Bacteria	p__Chloroflexi	c__Ktedonobacteria	o__C0119	f__norank_o__C0119	g__norank_o__C0119	s__uncultured_soil_bacterium_g__norank_o__C0119	OTU778	1	0	0	0	1	0	0	0	1	32	3	8	46
d__Bacteria	k__norank_d__Bacteria	p__Proteobacteria	c__Deltaproteobacteria	o__Myxococcales	f__Polyangiaceae	g__unclassified_f__Polyangiaceae	s__unclassified_f__Polyangiaceae	OTU2332	9	0	1	0	3	3	9	14	3	0	0	0	42
d__Bacteria	k__norank_d__Bacteria	p__Acidobacteria	c__Acidobacteria	o__Subgroup_10	f__ABS-19	g__norank_f__ABS-19	s__unclassified_g__norank_f__ABS-19	OTU1243	5	10	8	12	7	8	28	11	4	3	2	1	99
d__Bacteria	k__norank_d__Bacteria	p__Firmicutes	c__Bacilli	o__Bacillales	f__Thermoactinomycetaceae	g__Planifilum	s__uncultured_compost_bacterium_g__Planifilum	OTU3007	2	1	0	33	2	11	2	8	2	0	0	0	61
d__Bacteria	k__norank_d__Bacteria	p__Bacteroidetes	c__Cytophagia	o__Cytophagales	f__Cytophagaceae	g__Ohtaekwangia	s__uncultured_Bacteroidetes_bacterium_g__Ohtaekwangia	OTU1664	7	2	2	4	3	0	26	1	5	0	0	1	51
d__Bacteria	k__norank_d__Bacteria	p__Proteobacteria	c__Alphaproteobacteria	o__Caulobacterales	f__Caulobacteraceae	g__Phenylobacterium	s__unclassified_g__Phenylobacterium	OTU2211	17	16	18	39	32	33	62	32	27	65	42	36	419
d__Bacteria	k__norank_d__Bacteria	p__Planctomycetes	c__Phycisphaerae	o__Tepidisphaerales	f__Tepidisphaeraceae	g__norank_f__Tepidisphaeraceae	s__unclassified_g__norank_f__Tepidisphaeraceae	OTU1700	14	4	7	43	5	1	9	8	2	2	1	0	96
d__Bacteria	k__norank_d__Bacteria	p__unclassified_k__norank_d__Bacteria	c__unclassified_k__norank_d__Bacteria	o__unclassified_k__norank_d__Bacteria	f__unclassified_k__norank_d__Bacteria	g__unclassified_k__norank_d__Bacteria	s__unclassified_k__norank_d__Bacteria	OTU1870	0	0	0	0	1	1	2	2	1	0	0	0	7
d__Bacteria	k__norank_d__Bacteria	p__Verrucomicrobia	c__OPB35_soil_group	o__norank_c__OPB35_soil_group	f__norank_c__OPB35_soil_group	g__norank_c__OPB35_soil_group	s__uncultured_bacterium_g__norank_c__OPB35_soil_group	OTU1632	1	0	1	2	1	0	2	2	0	0	0	0	9
d__Bacteria	k__norank_d__Bacteria	p__Chloroflexi	c__Anaerolineae	o__Anaerolineales	f__Anaerolineaceae	g__norank_f__Anaerolineaceae	s__unclassified_g__norank_f__Anaerolineaceae	OTU180	3	2	0	1	0	2	2	0	0	0	0	0	10
d__Bacteria	k__norank_d__Bacteria	p__Planctomycetes	c__Planctomycetacia	o__Planctomycetales	f__Planctomycetaceae	g__norank_f__Planctomycetaceae	s__unclassified_g__norank_f__Planctomycetaceae	OTU710	13	7	6	58	24	1	18	5	10	46	10	24	222
d__Bacteria	k__norank_d__Bacteria	p__Chloroflexi	c__Ardenticatenia	o__Ardenticatenales	f__norank_o__Ardenticatenales	g__norank_o__Ardenticatenales	s__uncultured_bacterium_g__norank_o__Ardenticatenales	OTU3151	2	0	0	2	2	1	8	4	0	0	0	0	19
d__Bacteria	k__norank_d__Bacteria	p__Actinobacteria	c__Actinobacteria	o__Micromonosporales	f__Micromonosporaceae	g__Dactylosporangium	s__uncultured_bacterium_g__Dactylosporangium	OTU3149	16	16	14	51	19	24	30	23	11	1	3	1	209
d__Bacteria	k__norank_d__Bacteria	p__Actinobacteria	c__Actinobacteria	o__unclassified_c__Actinobacteria	f__unclassified_c__Actinobacteria	g__unclassified_c__Actinobacteria	s__unclassified_c__Actinobacteria	OTU781	0	0	0	0	0	0	0	0	0	23	3	4	30
d__Bacteria	k__norank_d__Bacteria	p__Proteobacteria	c__Alphaproteobacteria	o__Rhizobiales	f__Xanthobacteraceae	g__Pseudolabrys	s__unclassified_g__Pseudolabrys	OTU2372	19	7	15	26	19	36	30	10	16	61	45	21	305
d__Bacteria	k__norank_d__Bacteria	p__Proteobacteria	c__Betaproteobacteria	o__Burkholderiales	f__Oxalobacteraceae	g__Massilia	s__unclassified_g__Massilia	OTU1194	16	23	32	25	29	44	32	27	8	33	18	30	317
d__Bacteria	k__norank_d__Bacteria	p__Chloroflexi	c__Chloroflexia	o__Kallotenuales	f__AKIW781	g__norank_f__AKIW781	s__unclassified_g__norank_f__AKIW781	OTU2172	13	13	3	16	21	7	11	34	7	0	0	0	125
d__Bacteria	k__norank_d__Bacteria	p__Chloroflexi	c__Thermomicrobia	o__JG30-KF-CM45	f__norank_o__JG30-KF-CM45	g__norank_o__JG30-KF-CM45	s__uncultured_bacterium_g__norank_o__JG30-KF-CM45	OTU2329	9	20	6	4	2	11	10	2	16	38	8	13	139
d__Bacteria	k__norank_d__Bacteria	p__Actinobacteria	c__Actinobacteria	o__norank_c__Actinobacteria	f__norank_c__Actinobacteria	g__norank_c__Actinobacteria	s__unclassified_g__norank_c__Actinobacteria	OTU1445	31	1	9	1	3	2	9	9	10	2	0	3	80
d__Bacteria	k__norank_d__Bacteria	p__Proteobacteria	c__Deltaproteobacteria	o__Syntrophobacterales	f__Syntrophaceae	g__norank_f__Syntrophaceae	s__Myxococcales_bacterium_enrichment_culture_clone_11380	OTU227	3	0	0	0	1	1	1	0	0	0	0	0	6
d__Bacteria	k__norank_d__Bacteria	p__Proteobacteria	c__Gammaproteobacteria	o__Xanthomonadales	f__Xanthomonadaceae	g__Pseudoxanthomonas	s__unclassified_g__Pseudoxanthomonas	OTU400	1	1	2	0	0	1	1	0	0	1	2	0	9
d__Bacteria	k__norank_d__Bacteria	p__Actinobacteria	c__Actinobacteria	o__unclassified_c__Actinobacteria	f__unclassified_c__Actinobacteria	g__unclassified_c__Actinobacteria	s__unclassified_c__Actinobacteria	OTU1913	0	0	0	2	0	0	6	1	2	4	0	0	15
d__Bacteria	k__norank_d__Bacteria	p__Actinobacteria	c__Actinobacteria	o__Acidimicrobiales	f__norank_o__Acidimicrobiales	g__norank_o__Acidimicrobiales	s__unclassified_g__norank_o__Acidimicrobiales	OTU1070	4	4	3	7	6	9	5	4	2	6	0	3	53
d__Bacteria	k__norank_d__Bacteria	p__Actinobacteria	c__Actinobacteria	o__Rubrobacterales	f__Rubrobacteriaceae	g__Rubrobacter	s__unclassified_g__Rubrobacter	OTU2169	27	3	9	7	4	2	33	17	21	6	0	3	132
d__Bacteria	k__norank_d__Bacteria	p__Proteobacteria	c__Deltaproteobacteria	o__43F-1404R	f__norank_o__43F-1404R	g__norank_o__43F-1404R	s__uncultured_Desulfuromonadales_bacterium_g__norank_o__43F-1404R	OTU899	2	0	0	1	1	2	1	2	0	6	2	5	22
d__Bacteria	k__norank_d__Bacteria	p__Planctomycetes	c__Planctomycetacia	o__Planctomycetales	f__Planctomycetaceae	g__norank_f__Planctomycetaceae	s__unclassified_g__norank_f__Planctomycetaceae	OTU1197	8	10	4	11	7	0	5	5	2	0	0	0	52
d__Bacteria	k__norank_d__Bacteria	p__Chloroflexi	c__unclassified_p__Chloroflexi	o__unclassified_p__Chloroflexi	f__unclassified_p__Chloroflexi	g__unclassified_p__Chloroflexi	s__unclassified_p__Chloroflexi	OTU2096	2	0	0	0	1	0	14	2	3	0	0	0	22
d__Bacteria	k__norank_d__Bacteria	p__Actinobacteria	c__Actinobacteria	o__Micromonosporales	f__Micromonosporaceae	g__unclassified_f__Micromonosporaceae	s__unclassified_f__Micromonosporaceae	OTU3032	63	43	18	158	69	132	120	80	72	185	97	94	1131
d__Bacteria	k__norank_d__Bacteria	p__Proteobacteria	c__Alphaproteobacteria	o__Rhizobiales	f__unclassified_o__Rhizobiales	g__unclassified_o__Rhizobiales	s__unclassified_o__Rhizobiales	OTU2744	18	18	15	35	31	35	45	24	24	43	20	20	328
d__Bacteria	k__norank_d__Bacteria	p__Chloroflexi	c__unclassified_p__Chloroflexi	o__unclassified_p__Chloroflexi	f__unclassified_p__Chloroflexi	g__unclassified_p__Chloroflexi	s__unclassified_p__Chloroflexi	OTU1216	1	3	0	3	3	1	1	2	2	0	1	1	18
d__Bacteria	k__norank_d__Bacteria	p__Actinobacteria	c__Actinobacteria	o__Solirubrobacterales	f__p35j06ok	g__norank_f__p35j06ok	s__uncultured_bacterium_g__norank_f__p35j06ok	OTU855	0	2	1	3	1	4	0	2	5	7	30	16	71
d__Bacteria	k__norank_d__Bacteria	p__Chloroflexi	c__Chloroflexia	o__Chloroflexales	f__Roseiflexaceae	g__Roseiflexus	s__uncultured_Chloroflexi_bacterium_g__Roseiflexus	OTU2402	88	52	44	58	70	11	94	42	30	1	0	0	490
d__Bacteria	k__norank_d__Bacteria	p__Chloroflexi	c__SBR2076	o__norank_c__SBR2076	f__norank_c__SBR2076	g__norank_c__SBR2076	s__uncultured_bacterium_g__norank_c__SBR2076	OTU2676	34	1	0	3	11	0	8	4	5	0	0	0	66
d__Bacteria	k__norank_d__Bacteria	p__Planctomycetes	c__Planctomycetacia	o__Planctomycetales	f__Planctomycetaceae	g__norank_f__Planctomycetaceae	s__unclassified_g__norank_f__Planctomycetaceae	OTU1972	0	1	1	2	0	0	4	1	0	0	0	0	9
d__Bacteria	k__norank_d__Bacteria	p__Planctomycetes	c__Planctomycetacia	o__Planctomycetales	f__Planctomycetaceae	g__norank_f__Planctomycetaceae	s__unclassified_g__norank_f__Planctomycetaceae	OTU1978	0	0	0	1	1	0	2	0	0	0	0	0	4
d__Bacteria	k__norank_d__Bacteria	p__unclassified_k__norank_d__Bacteria	c__unclassified_k__norank_d__Bacteria	o__unclassified_k__norank_d__Bacteria	f__unclassified_k__norank_d__Bacteria	g__unclassified_k__norank_d__Bacteria	s__unclassified_k__norank_d__Bacteria	OTU2816	26	6	17	7	6	4	8	5	1	5	0	1	86
d__Bacteria	k__norank_d__Bacteria	p__Gemmatimonadetes	c__Gemmatimonadetes	o__Longimicrobiales	f__Longimicrobiaceae	g__norank_f__Longimicrobiaceae	s__unclassified_g__norank_f__Longimicrobiaceae	OTU640	3	2	0	6	4	2	5	3	3	10	4	4	46
d__Bacteria	k__norank_d__Bacteria	p__Proteobacteria	c__Alphaproteobacteria	o__Rhizobiales	f__Methylobacteriaceae	g__Microvirga	s__unclassified_g__Microvirga	OTU725	40	22	17	48	44	38	112	63	50	38	19	28	519
d__Bacteria	k__norank_d__Bacteria	p__Actinobacteria	c__Actinobacteria	o__Frankiales	f__unclassified_o__Frankiales	g__unclassified_o__Frankiales	s__unclassified_o__Frankiales	OTU1902	3	0	9	9	8	9	4	0	13	58	9	13	135
d__Bacteria	k__norank_d__Bacteria	p__Verrucomicrobia	c__OPB35_soil_group	o__norank_c__OPB35_soil_group	f__norank_c__OPB35_soil_group	g__norank_c__OPB35_soil_group	s__Verrucomicrobia_bacterium_LX181	OTU1713	0	0	0	0	2	0	6	0	0	0	0	0	8
d__Bacteria	k__norank_d__Bacteria	p__Acidobacteria	c__Acidobacteria	o__Subgroup_10	f__ABS-19	g__norank_f__ABS-19	s__unclassified_g__norank_f__ABS-19	OTU3231	22	18	28	25	24	31	53	16	13	21	7	10	268
d__Bacteria	k__norank_d__Bacteria	p__Acidobacteria	c__Acidobacteria	o__norank_c__Acidobacteria	f__norank_c__Acidobacteria	g__norank_c__Acidobacteria	s__uncultured_bacterium_gp17	OTU2663	15	9	3	5	5	0	8	6	3	1	0	0	55
d__Bacteria	k__norank_d__Bacteria	p__Chloroflexi	c__JG30-KF-CM66	o__norank_c__JG30-KF-CM66	f__norank_c__JG30-KF-CM66	g__norank_c__JG30-KF-CM66	s__uncultured_bacterium_g__norank_c__JG30-KF-CM66	OTU377	3	6	3	1	5	1	1	6	0	0	0	0	26
d__Bacteria	k__norank_d__Bacteria	p__Chloroflexi	c__Anaerolineae	o__Anaerolineales	f__Anaerolineaceae	g__norank_f__Anaerolineaceae	s__unclassified_g__norank_f__Anaerolineaceae	OTU2616	61	63	20	20	35	4	7	6	2	0	0	1	219
d__Bacteria	k__norank_d__Bacteria	p__Planctomycetes	c__Planctomycetacia	o__Planctomycetales	f__Planctomycetaceae	g__Rhodopirellula	s__uncultured_Planctomycetaceae_bacterium_g__Rhodopirellula	OTU2065	1	1	0	15	4	0	3	3	1	7	4	2	41
d__Bacteria	k__norank_d__Bacteria	p__Acidobacteria	c__Acidobacteria	o__Blastocatellales	f__Blastocatellaceae__Subgroup_4_	g__DS-100	s__unclassified_g__DS-100	OTU2382	4	2	2	11	3	3	9	5	1	2	0	0	42
d__Bacteria	k__norank_d__Bacteria	p__Proteobacteria	c__Deltaproteobacteria	o__Bdellovibrionales	f__Bdellovibrionaceae	g__OM27_clade	s__uncultured_Myxococcales_bacterium_g__OM27_clade	OTU837	0	1	0	0	2	2	0	0	1	3	1	1	11
d__Bacteria	k__norank_d__Bacteria	p__Proteobacteria	c__Alphaproteobacteria	o__Caulobacterales	f__Caulobacteraceae	g__norank_f__Caulobacteraceae	s__uncultured_endolithic_bacterium_g__norank_f__Caulobacteraceae	OTU727	0	0	0	2	0	1	5	1	3	9	2	8	31
d__Bacteria	k__norank_d__Bacteria	p__Bacteroidetes	c__Cytophagia	o__Cytophagales	f__Cytophagaceae	g__Adhaeribacter	s__uncultured_bacterium_g__Adhaeribacter	OTU1959	0	1	0	2	1	0	2	2	0	2	0	2	12
d__Bacteria	k__norank_d__Bacteria	p__Chloroflexi	c__Thermomicrobia	o__JG30-KF-CM45	f__norank_o__JG30-KF-CM45	g__norank_o__JG30-KF-CM45	s__unclassified_g__norank_o__JG30-KF-CM45	OTU916	4	4	2	1	2	0	0	4	1	8	8	2	36
d__Bacteria	k__norank_d__Bacteria	p__Actinobacteria	c__Actinobacteria	o__Kineosporiales	f__Kineosporiaceae	g__unclassified_f__Kineosporiaceae	s__unclassified_f__Kineosporiaceae	OTU680	8	7	4	31	11	8	6	4	6	7	2	2	96
d__Bacteria	k__norank_d__Bacteria	p__Actinobacteria	c__Actinobacteria	o__Micrococcales	f__Microbacteriaceae	g__Agromyces	s__unclassified_g__Agromyces	OTU2515	10	8	16	12	14	9	16	10	6	16	3	1	121
d__Bacteria	k__norank_d__Bacteria	p__Firmicutes	c__Bacilli	o__Bacillales	f__Paenibacillaceae	g__Thermobacillus	s__unclassified_g__Thermobacillus	OTU2984	0	0	0	1	1	1	0	1	0	0	0	0	4
d__Bacteria	k__norank_d__Bacteria	p__Gemmatimonadetes	c__Gemmatimonadetes	o__Longimicrobiales	f__Longimicrobiaceae	g__norank_f__Longimicrobiaceae	s__unclassified_g__norank_f__Longimicrobiaceae	OTU3179	2	0	0	8	4	3	0	0	1	5	0	0	23
d__Bacteria	k__norank_d__Bacteria	p__Actinobacteria	c__Actinobacteria	o__norank_c__Actinobacteria	f__norank_c__Actinobacteria	g__norank_c__Actinobacteria	s__unclassified_g__norank_c__Actinobacteria	OTU1301	3	0	5	22	14	1	2	6	6	18	6	5	88
d__Bacteria	k__norank_d__Bacteria	p__Actinobacteria	c__Actinobacteria	o__Acidimicrobiales	f__norank_o__Acidimicrobiales	g__norank_o__Acidimicrobiales	s__unclassified_g__norank_o__Acidimicrobiales	OTU692	0	0	0	0	0	0	1	2	1	17	2	8	31
d__Bacteria	k__norank_d__Bacteria	p__Gemmatimonadetes	c__Gemmatimonadetes	o__norank_c__Gemmatimonadetes	f__norank_c__Gemmatimonadetes	g__norank_c__Gemmatimonadetes	s__uncultured_soil_bacterium_g__norank_c__Gemmatimonadetes	OTU2674	4	3	4	8	5	4	12	3	3	0	1	1	48
d__Bacteria	k__norank_d__Bacteria	p__Actinobacteria	c__Actinobacteria	o__Micromonosporales	f__Micromonosporaceae	g__Rhizocola	s__unclassified_g__Rhizocola	OTU1232	8	2	5	6	6	6	13	8	1	6	5	3	69
d__Bacteria	k__norank_d__Bacteria	p__Acidobacteria	c__Acidobacteria	o__Blastocatellales	f__Blastocatellaceae__Subgroup_4_	g__Blastocatella	s__uncultured_Acidobacteria_bacterium_g__Blastocatella	OTU1087	4	1	4	1	6	0	5	6	6	2	1	0	36
d__Bacteria	k__norank_d__Bacteria	p__Actinobacteria	c__Actinobacteria	o__Propionibacteriales	f__Nocardioidaceae	g__Nocardioides	s__unclassified_g__Nocardioides	OTU706	14	8	10	9	23	17	43	31	43	53	17	50	318
d__Bacteria	k__norank_d__Bacteria	p__Acidobacteria	c__Acidobacteria	o__Blastocatellales	f__Blastocatellaceae__Subgroup_4_	g__DS-100	s__uncultured_Acidobacteriales_bacterium_g__DS-100	OTU1505	0	1	0	0	1	0	6	6	6	0	0	0	20
d__Bacteria	k__norank_d__Bacteria	p__Chloroflexi	c__Thermomicrobia	o__JG30-KF-CM45	f__norank_o__JG30-KF-CM45	g__norank_o__JG30-KF-CM45	s__unclassified_g__norank_o__JG30-KF-CM45	OTU2622	23	24	9	20	14	15	30	32	22	3	0	0	192
d__Bacteria	k__norank_d__Bacteria	p__Proteobacteria	c__Alphaproteobacteria	o__Rhizobiales	f__Bradyrhizobiaceae	g__Bradyrhizobium	s__unclassified_g__Bradyrhizobium	OTU2200	241	122	182	280	224	257	236	167	135	184	121	93	2242
d__Bacteria	k__norank_d__Bacteria	p__Actinobacteria	c__Actinobacteria	o__Solirubrobacterales	f__Solirubrobacteraceae	g__Solirubrobacter	s__uncultured_Solirubrobacter_sp._g__Solirubrobacter	OTU1860	131	84	71	141	173	107	236	126	135	115	42	56	1417
d__Bacteria	k__norank_d__Bacteria	p__Bacteroidetes	c__Cytophagia	o__Cytophagales	f__Cytophagaceae	g__Nibribacter	s__uncultured_bacterium_g__Nibribacter	OTU658	0	0	0	0	1	0	0	0	1	7	5	5	19
d__Bacteria	k__norank_d__Bacteria	p__Nitrospirae	c__Nitrospira	o__norank_c__Nitrospira	f__norank_c__Nitrospira	g__Nitrospira	s__uncultured_Nitrospirales_bacterium	OTU1468	5	4	7	5	10	9	0	3	1	1	2	0	47
d__Bacteria	k__norank_d__Bacteria	p__Proteobacteria	c__Deltaproteobacteria	o__Myxococcales	f__Nannocystaceae	g__norank_f__Nannocystaceae	s__unclassified_g__norank_f__Nannocystaceae	OTU436	0	1	0	0	2	1	2	1	0	0	0	0	7
d__Bacteria	k__norank_d__Bacteria	p__Gemmatimonadetes	c__Gemmatimonadetes	o__Gemmatimonadales	f__Gemmatimonadaceae	g__norank_f__Gemmatimonadaceae	s__Gemmatimonadetes_bacterium_LX87	OTU158	2	0	0	9	2	3	1	0	0	3	0	2	22
d__Bacteria	k__norank_d__Bacteria	p__Proteobacteria	c__Gammaproteobacteria	o__unclassified_c__Gammaproteobacteria	f__unclassified_c__Gammaproteobacteria	g__unclassified_c__Gammaproteobacteria	s__unclassified_c__Gammaproteobacteria	OTU2680	0	0	0	0	0	0	2	0	0	0	0	0	2
d__Bacteria	k__norank_d__Bacteria	p__Planctomycetes	c__Planctomycetacia	o__Planctomycetales	f__Planctomycetaceae	g__norank_f__Planctomycetaceae	s__unclassified_g__norank_f__Planctomycetaceae	OTU237	3	2	1	14	3	0	1	1	5	2	0	0	32
d__Bacteria	k__norank_d__Bacteria	p__Proteobacteria	c__Deltaproteobacteria	o__Myxococcales	f__Polyangiaceae	g__Sorangium	s__uncultured_delta_proteobacterium_g__Sorangium	OTU1144	2	3	0	8	2	4	4	2	5	2	2	0	34
d__Bacteria	k__norank_d__Bacteria	p__Actinobacteria	c__Actinobacteria	o__Gaiellales	f__Gaiellaceae	g__Gaiella	s__unclassified_g__Gaiella	OTU2502	9	2	3	2	10	6	64	29	34	0	0	0	159
d__Bacteria	k__norank_d__Bacteria	p__Proteobacteria	c__Alphaproteobacteria	o__Rhodospirillales	f__Rhodospirillales_Incertae_Sedis	g__Candidatus_Alysiosphaera	s__uncultured_bacterium_g__Candidatus_Alysiosphaera	OTU2848	26	16	6	24	40	29	52	27	21	12	7	10	270
d__Bacteria	k__norank_d__Bacteria	p__TM6__Dependentiae_	c__norank_p__TM6__Dependentiae_	o__norank_p__TM6__Dependentiae_	f__norank_p__TM6__Dependentiae_	g__norank_p__TM6__Dependentiae_	s__uncultured_bacterium_g__norank_p__TM6__Dependentiae_	OTU1522	0	0	0	0	0	0	2	0	0	0	0	0	2
d__Bacteria	k__norank_d__Bacteria	p__Chloroflexi	c__S085	o__norank_c__S085	f__norank_c__S085	g__norank_c__S085	s__uncultured_bacterium_g__norank_c__S085	OTU1200	28	10	15	13	8	13	6	24	9	0	0	0	126
d__Bacteria	k__norank_d__Bacteria	p__Fibrobacteres	c__Fibrobacteria	o__Fibrobacterales	f__Fibrobacteraceae	g__norank_f__Fibrobacteraceae	s__unclassified_g__norank_f__Fibrobacteraceae	OTU1787	2	3	0	4	6	2	18	5	2	0	0	0	42
d__Bacteria	k__norank_d__Bacteria	p__Acidobacteria	c__Acidobacteria	o__Solibacterales	f__Solibacteraceae__Subgroup_3_	g__Elev-16S-1166	s__uncultured_bacterium_g__Elev-16S-1166	OTU1894	3	0	0	2	2	3	10	5	2	0	0	0	27
d__Bacteria	k__norank_d__Bacteria	p__Chloroflexi	c__Anaerolineae	o__Anaerolineales	f__Anaerolineaceae	g__norank_f__Anaerolineaceae	s__uncultured_Chloroflexi_bacterium_g__norank_f__Anaerolineaceae	OTU1534	1	0	1	0	0	0	3	1	0	0	0	0	6
d__Bacteria	k__norank_d__Bacteria	p__Actinobacteria	c__Actinobacteria	o__Micromonosporales	f__Micromonosporaceae	g__Actinoplanes	s__unclassified_g__Actinoplanes	OTU3003	21	16	33	30	19	25	18	15	14	35	8	6	240
d__Bacteria	k__norank_d__Bacteria	p__Actinobacteria	c__Actinobacteria	o__Acidimicrobiales	f__norank_o__Acidimicrobiales	g__norank_o__Acidimicrobiales	s__unclassified_g__norank_o__Acidimicrobiales	OTU3169	1	0	0	7	4	6	2	2	2	13	3	6	46
d__Bacteria	k__norank_d__Bacteria	p__Planctomycetes	c__Planctomycetacia	o__Planctomycetales	f__Planctomycetaceae	g__norank_f__Planctomycetaceae	s__uncultured_bacterium_g__norank_f__Planctomycetaceae	OTU1831	3	0	1	6	2	0	4	0	0	0	0	0	16
d__Bacteria	k__norank_d__Bacteria	p__unclassified_k__norank_d__Bacteria	c__unclassified_k__norank_d__Bacteria	o__unclassified_k__norank_d__Bacteria	f__unclassified_k__norank_d__Bacteria	g__unclassified_k__norank_d__Bacteria	s__unclassified_k__norank_d__Bacteria	OTU1258	0	0	0	0	0	0	0	1	1	0	0	0	2
d__Bacteria	k__norank_d__Bacteria	p__Planctomycetes	c__Phycisphaerae	o__Tepidisphaerales	f__Tepidisphaeraceae	g__norank_f__Tepidisphaeraceae	s__uncultured_Planctomycetales_bacterium_g__norank_f__Tepidisphaeraceae	OTU2871	11	8	5	12	2	0	16	3	2	0	0	0	59
d__Bacteria	k__norank_d__Bacteria	p__Actinobacteria	c__Actinobacteria	o__Glycomycetales	f__Glycomycetaceae	g__Glycomyces	s__Glycomyces_scopariae	OTU1056	0	0	0	0	0	1	2	2	4	1	1	0	11
d__Bacteria	k__norank_d__Bacteria	p__Actinobacteria	c__Actinobacteria	o__Propionibacteriales	f__Nocardioidaceae	g__Nocardioides	s__unclassified_g__Nocardioides	OTU2813	44	26	30	31	39	31	111	47	53	111	54	63	640
d__Bacteria	k__norank_d__Bacteria	p__Bacteroidetes	c__Cytophagia	o__Cytophagales	f__Cytophagaceae	g__Hymenobacter	s__unclassified_g__Hymenobacter	OTU1161	1	1	0	0	1	3	2	4	2	1	0	0	15
d__Bacteria	k__norank_d__Bacteria	p__Planctomycetes	c__Planctomycetacia	o__Planctomycetales	f__Planctomycetaceae	g__norank_f__Planctomycetaceae	s__uncultured_bacterium_g__norank_f__Planctomycetaceae	OTU3293	0	0	0	0	3	0	0	1	0	0	0	0	4
d__Bacteria	k__norank_d__Bacteria	p__Proteobacteria	c__Gammaproteobacteria	o__Xanthomonadales	f__Solimonadaceae	g__unclassified_f__Solimonadaceae	s__unclassified_f__Solimonadaceae	OTU1618	0	1	1	0	1	0	5	0	1	0	0	0	9
d__Bacteria	k__norank_d__Bacteria	p__Actinobacteria	c__Actinobacteria	o__Frankiales	f__Geodermatophilaceae	g__Modestobacter	s__uncultured_bacterium_g__Modestobacter	OTU2669	13	6	3	10	4	9	18	10	8	111	34	27	253
d__Bacteria	k__norank_d__Bacteria	p__Actinobacteria	c__Actinobacteria	o__Gaiellales	f__unclassified_o__Gaiellales	g__unclassified_o__Gaiellales	s__unclassified_o__Gaiellales	OTU1731	15	7	7	12	5	11	48	21	21	0	0	0	147
d__Bacteria	k__norank_d__Bacteria	p__Proteobacteria	c__Deltaproteobacteria	o__Desulfurellales	f__Desulfurellaceae	g__G55	s__uncultured_bacterium_g__G55	OTU1532	0	2	0	0	1	0	1	1	0	0	0	1	6
d__Bacteria	k__norank_d__Bacteria	p__Armatimonadetes	c__norank_p__Armatimonadetes	o__norank_p__Armatimonadetes	f__norank_p__Armatimonadetes	g__norank_p__Armatimonadetes	s__unclassified_g__norank_p__Armatimonadetes	OTU3089	1	0	0	3	1	1	0	3	2	0	0	0	11
d__Bacteria	k__norank_d__Bacteria	p__Chloroflexi	c__Thermomicrobia	o__JG30-KF-CM45	f__norank_o__JG30-KF-CM45	g__norank_o__JG30-KF-CM45	s__unclassified_g__norank_o__JG30-KF-CM45	OTU2711	15	32	4	10	14	15	9	12	10	13	7	5	146
d__Bacteria	k__norank_d__Bacteria	p__Chloroflexi	c__Chloroflexia	o__Kallotenuales	f__AKIW781	g__norank_f__AKIW781	s__uncultured_bacterium_g__norank_f__AKIW781	OTU1164	5	2	1	3	6	4	2	2	4	1	0	0	30
d__Bacteria	k__norank_d__Bacteria	p__Armatimonadetes	c__norank_p__Armatimonadetes	o__norank_p__Armatimonadetes	f__norank_p__Armatimonadetes	g__norank_p__Armatimonadetes	s__uncultured_bacterium_g__norank_p__Armatimonadetes	OTU2022	4	2	5	2	3	10	12	4	3	1	0	0	46
d__Bacteria	k__norank_d__Bacteria	p__Actinobacteria	c__Actinobacteria	o__Propionibacteriales	f__Nocardioidaceae	g__Nocardioides	s__unclassified_g__Nocardioides	OTU857	66	53	40	53	72	42	70	57	32	28	19	21	553
d__Bacteria	k__norank_d__Bacteria	p__Actinobacteria	c__Actinobacteria	o__Propionibacteriales	f__Nocardioidaceae	g__Nocardioides	s__unclassified_g__Nocardioides	OTU851	73	52	47	140	186	108	121	80	68	182	124	209	1390
d__Bacteria	k__norank_d__Bacteria	p__unclassified_k__norank_d__Bacteria	c__unclassified_k__norank_d__Bacteria	o__unclassified_k__norank_d__Bacteria	f__unclassified_k__norank_d__Bacteria	g__unclassified_k__norank_d__Bacteria	s__unclassified_k__norank_d__Bacteria	OTU301	1	0	1	0	0	0	0	0	3	0	0	0	5
d__Bacteria	k__norank_d__Bacteria	p__Planctomycetes	c__Planctomycetacia	o__Planctomycetales	f__Planctomycetaceae	g__norank_f__Planctomycetaceae	s__uncultured_bacterium_g__norank_f__Planctomycetaceae	OTU1545	4	2	1	0	0	0	8	8	3	0	0	0	26
d__Bacteria	k__norank_d__Bacteria	p__Proteobacteria	c__Alphaproteobacteria	o__Rhizobiales	f__Bradyrhizobiaceae	g__Bosea	s__Bosea_massiliensis	OTU1014	12	6	5	8	9	11	12	9	6	40	48	39	205
d__Bacteria	k__norank_d__Bacteria	p__Proteobacteria	c__Deltaproteobacteria	o__Myxococcales	f__unclassified_o__Myxococcales	g__unclassified_o__Myxococcales	s__unclassified_o__Myxococcales	OTU3214	146	88	84	310	314	228	272	174	118	64	17	55	1870
d__Bacteria	k__norank_d__Bacteria	p__Gemmatimonadetes	c__Gemmatimonadetes	o__Gemmatimonadales	f__Gemmatimonadaceae	g__unclassified_f__Gemmatimonadaceae	s__unclassified_f__Gemmatimonadaceae	OTU1383	0	0	0	2	2	0	0	1	0	0	0	0	5
d__Bacteria	k__norank_d__Bacteria	p__Gemmatimonadetes	c__Gemmatimonadetes	o__Longimicrobiales	f__Longimicrobiaceae	g__norank_f__Longimicrobiaceae	s__unclassified_g__norank_f__Longimicrobiaceae	OTU864	0	0	0	1	1	0	2	0	0	2	1	0	7
d__Bacteria	k__norank_d__Bacteria	p__Acidobacteria	c__Acidobacteria	o__Solibacterales	f__Solibacteraceae__Subgroup_3_	g__Bryobacter	s__unclassified_g__Bryobacter	OTU576	3	0	3	0	2	0	3	2	0	6	1	1	21
d__Bacteria	k__norank_d__Bacteria	p__Armatimonadetes	c__Fimbriimonadia	o__Fimbriimonadales	f__Fimbriimonadaceae	g__norank_f__Fimbriimonadaceae	s__unclassified_g__norank_f__Fimbriimonadaceae	OTU332	0	1	0	2	0	0	0	1	0	0	0	0	4
d__Bacteria	k__norank_d__Bacteria	p__Firmicutes	c__Clostridia	o__Clostridiales	f__Clostridiaceae_1	g__Clostridium_sensu_stricto_1	s__unclassified_g__Clostridium_sensu_stricto_1	OTU2581	0	2	1	2	0	2	2	0	2	0	0	0	11
d__Bacteria	k__norank_d__Bacteria	p__Proteobacteria	c__Deltaproteobacteria	o__Bdellovibrionales	f__Bdellovibrionaceae	g__OM27_clade	s__unclassified_g__OM27_clade	OTU438	1	2	0	0	0	2	2	1	0	0	0	0	8
d__Bacteria	k__norank_d__Bacteria	p__Proteobacteria	c__Deltaproteobacteria	o__Oligoflexales	f__0319-6G20	g__norank_f__0319-6G20	s__unclassified_g__norank_f__0319-6G20	OTU412	1	2	0	1	3	1	0	0	1	0	0	0	9
d__Bacteria	k__norank_d__Bacteria	p__Proteobacteria	c__Alphaproteobacteria	o__Rhizobiales	f__Xanthobacteraceae	g__Variibacter	s__unclassified_g__Variibacter	OTU2872	33	16	26	38	36	53	40	15	17	38	29	30	371
d__Bacteria	k__norank_d__Bacteria	p__Chloroflexi	c__Chloroflexia	o__Chloroflexales	f__Roseiflexaceae	g__Roseiflexus	s__uncultured_bacterium_g__Roseiflexus	OTU2751	6	9	6	7	5	1	13	3	0	1	1	4	56
d__Bacteria	k__norank_d__Bacteria	p__Armatimonadetes	c__Armatimonadia	o__Armatimonadales	f__unclassified_o__Armatimonadales	g__unclassified_o__Armatimonadales	s__unclassified_o__Armatimonadales	OTU3286	1	0	0	1	2	3	0	0	0	2	1	1	11
d__Bacteria	k__norank_d__Bacteria	p__Chloroflexi	c__KD4-96	o__norank_c__KD4-96	f__norank_c__KD4-96	g__norank_c__KD4-96	s__uncultured_Chloroflexi_bacterium_g__norank_c__KD4-96	OTU1478	124	53	117	52	27	7	48	47	71	27	4	9	586
d__Bacteria	k__norank_d__Bacteria	p__Planctomycetes	c__Planctomycetacia	o__Planctomycetales	f__Planctomycetaceae	g__norank_f__Planctomycetaceae	s__uncultured_bacterium_g__norank_f__Planctomycetaceae	OTU2587	1	2	2	1	6	0	4	1	3	1	1	0	22
d__Bacteria	k__norank_d__Bacteria	p__Saccharibacteria	c__norank_p__Saccharibacteria	o__norank_p__Saccharibacteria	f__norank_p__Saccharibacteria	g__norank_p__Saccharibacteria	s__unclassified_g__norank_p__Saccharibacteria	OTU878	0	0	0	0	0	0	0	1	0	0	19	0	20
d__Bacteria	k__norank_d__Bacteria	p__Firmicutes	c__Bacilli	o__Bacillales	f__Bacillaceae	g__norank_f__Bacillaceae	s__uncultured_bacterium_g__norank_f__Bacillaceae	OTU1036	0	0	0	4	4	0	0	1	2	0	0	0	11
d__Bacteria	k__norank_d__Bacteria	p__Proteobacteria	c__Alphaproteobacteria	o__Rhodospirillales	f__Acetobacteraceae	g__Craurococcus	s__unclassified_g__Craurococcus	OTU2114	2	1	0	0	1	2	5	2	1	3	3	1	21
d__Bacteria	k__norank_d__Bacteria	p__Gemmatimonadetes	c__Gemmatimonadetes	o__Longimicrobiales	f__Longimicrobiaceae	g__norank_f__Longimicrobiaceae	s__unclassified_g__norank_f__Longimicrobiaceae	OTU2888	0	0	0	8	6	6	5	1	5	14	5	7	57
d__Bacteria	k__norank_d__Bacteria	p__Cyanobacteria	c__Cyanobacteria	o__SubsectionIII	f__FamilyI_o__SubsectionIII	g__norank_f__FamilyI_o__SubsectionIII	s__uncultured_bacterium_g__norank_f__FamilyI_o__SubsectionIII	OTU13	0	1	17	0	0	0	0	0	0	0	0	0	18
d__Bacteria	k__norank_d__Bacteria	p__Proteobacteria	c__Gammaproteobacteria	o__Xanthomonadales	f__Xanthomonadales_Incertae_Sedis	g__norank_f__Xanthomonadales_Incertae_Sedis	s__uncultured_Steroidobacter_sp._g__norank	OTU2189	19	9	15	12	15	9	55	22	15	0	0	2	173
d__Bacteria	k__norank_d__Bacteria	p__Gemmatimonadetes	c__Gemmatimonadetes	o__Longimicrobiales	f__Longimicrobiaceae	g__norank_f__Longimicrobiaceae	s__unclassified_g__norank_f__Longimicrobiaceae	OTU2881	2	1	0	5	5	5	3	0	1	7	1	1	31
d__Bacteria	k__norank_d__Bacteria	p__Planctomycetes	c__Planctomycetacia	o__Planctomycetales	f__Planctomycetaceae	g__norank_f__Planctomycetaceae	s__uncultured_sludge_bacterium_A17	OTU1875	3	3	4	5	5	0	3	2	0	6	1	2	34
d__Bacteria	k__norank_d__Bacteria	p__Gemmatimonadetes	c__Gemmatimonadetes	o__norank_c__Gemmatimonadetes	f__norank_c__Gemmatimonadetes	g__norank_c__Gemmatimonadetes	s__uncultured_bacterium_g__norank_c__Gemmatimonadetes	OTU129	11	8	6	11	9	3	14	3	3	2	1	0	71
d__Bacteria	k__norank_d__Bacteria	p__Gemmatimonadetes	c__Gemmatimonadetes	o__Gemmatimonadales	f__Gemmatimonadaceae	g__norank_f__Gemmatimonadaceae	s__unclassified_g__norank_f__Gemmatimonadaceae	OTU70	30	21	19	36	28	28	18	12	9	2	3	2	208
d__Bacteria	k__norank_d__Bacteria	p__Proteobacteria	c__Alphaproteobacteria	o__Rhodospirillales	f__DA111	g__norank_f__DA111	s__unclassified_g__norank_f__DA111	OTU1491	20	6	11	16	18	15	27	9	13	8	3	6	152
d__Bacteria	k__norank_d__Bacteria	p__Acidobacteria	c__Acidobacteria	o__Solibacterales	f__Solibacteraceae__Subgroup_3_	g__Candidatus_Solibacter	s__unclassified_g__Candidatus_Solibacter	OTU2723	12	13	5	6	6	4	32	17	6	0	0	0	101
d__Bacteria	k__norank_d__Bacteria	p__Chloroflexi	c__Chloroflexia	o__Chloroflexales	f__Roseiflexaceae	g__Roseiflexus	s__uncultured_bacterium_g__Roseiflexus	OTU1128	6	9	10	3	3	3	18	3	9	0	0	0	64
d__Bacteria	k__norank_d__Bacteria	p__Bacteroidetes	c__Cytophagia	o__Cytophagales	f__Cytophagaceae	g__Adhaeribacter	s__uncultured_Bacteroidetes_bacterium_g__Adhaeribacter	OTU1400	5	3	6	7	6	3	25	10	3	7	5	7	87
d__Bacteria	k__norank_d__Bacteria	p__Actinobacteria	c__Actinobacteria	o__Acidimicrobiales	f__norank_o__Acidimicrobiales	g__norank_o__Acidimicrobiales	s__unclassified_g__norank_o__Acidimicrobiales	OTU1689	40	23	7	59	57	43	116	36	36	35	10	25	487
d__Bacteria	k__norank_d__Bacteria	p__Actinobacteria	c__Actinobacteria	o__Frankiales	f__Geodermatophilaceae	g__Modestobacter	s__unclassified_g__Modestobacter	OTU1288	53	22	27	92	63	86	135	90	53	549	227	322	1719
d__Bacteria	k__norank_d__Bacteria	p__Chloroflexi	c__KD4-96	o__norank_c__KD4-96	f__norank_c__KD4-96	g__norank_c__KD4-96	s__uncultured_Chloroflexi_bacterium_g__norank_c__KD4-96	OTU1271	104	49	91	28	28	6	41	30	73	23	4	8	485
d__Bacteria	k__norank_d__Bacteria	p__Firmicutes	c__Bacilli	o__Bacillales	f__Bacillaceae	g__Caldalkalibacillus	s__uncultured_bacterium_g__Caldalkalibacillus	OTU1375	0	0	0	1	0	0	0	1	0	0	0	0	2
d__Bacteria	k__norank_d__Bacteria	p__Firmicutes	c__Bacilli	o__Bacillales	f__Paenibacillaceae	g__Paenibacillus	s__unclassified_g__Paenibacillus	OTU2362	2	1	1	0	0	0	2	0	0	0	0	0	6
d__Bacteria	k__norank_d__Bacteria	p__Actinobacteria	c__Actinobacteria	o__Micromonosporales	f__Micromonosporaceae	g__norank_f__Micromonosporaceae	s__uncultured_actinobacterium_g__norank_f__Micromonosporaceae	OTU1804	24	27	5	90	33	42	39	47	24	74	12	187	604
d__Bacteria	k__norank_d__Bacteria	p__Chloroflexi	c__Thermomicrobia	o__JG30-KF-CM45	f__norank_o__JG30-KF-CM45	g__norank_o__JG30-KF-CM45	s__uncultured_bacterium_g__norank_o__JG30-KF-CM45	OTU588	0	0	1	3	1	10	1	2	2	32	6	4	62
d__Bacteria	k__norank_d__Bacteria	p__Actinobacteria	c__Actinobacteria	o__Acidimicrobiales	f__unclassified_o__Acidimicrobiales	g__unclassified_o__Acidimicrobiales	s__unclassified_o__Acidimicrobiales	OTU1956	3	0	2	2	1	4	7	3	4	2	2	5	35
d__Bacteria	k__norank_d__Bacteria	p__Proteobacteria	c__Betaproteobacteria	o__Nitrosomonadales	f__Nitrosomonadaceae	g__norank_f__Nitrosomonadaceae	s__unclassified_g__norank_f__Nitrosomonadaceae	OTU482	11	5	4	16	8	16	1	6	4	5	3	5	84
d__Bacteria	k__norank_d__Bacteria	p__Chloroflexi	c__Anaerolineae	o__Anaerolineales	f__Anaerolineaceae	g__norank_f__Anaerolineaceae	s__uncultured_Gemmatimonadetes_bacterium_g__norank_f__Anaerolineaceae	OTU2188	27	91	15	19	27	0	75	6	28	0	0	0	288
d__Bacteria	k__norank_d__Bacteria	p__Gemmatimonadetes	c__Gemmatimonadetes	o__Gemmatimonadales	f__Gemmatimonadaceae	g__Gemmatimonas	s__unclassified_g__Gemmatimonas	OTU2043	3	4	0	2	1	2	17	1	6	3	1	4	44
d__Bacteria	k__norank_d__Bacteria	p__Planctomycetes	c__Planctomycetacia	o__Planctomycetales	f__Planctomycetaceae	g__Planctomyces	s__uncultured_Planctomycetaceae_bacterium_g__Planctomyces	OTU946	11	11	8	46	12	2	11	8	4	3	0	4	120
d__Bacteria	k__norank_d__Bacteria	p__Acidobacteria	c__Acidobacteria	o__Blastocatellales	f__Blastocatellaceae__Subgroup_4_	g__11-24	s__unclassified_g__11-24	OTU1122	4	0	1	4	1	0	1	0	2	0	0	0	13
d__Bacteria	k__norank_d__Bacteria	p__Proteobacteria	c__Alphaproteobacteria	o__Sphingomonadales	f__Erythrobacteraceae	g__Altererythrobacter	s__unclassified_g__Altererythrobacter	OTU925	0	1	0	1	2	4	2	1	0	10	5	8	34
d__Bacteria	k__norank_d__Bacteria	p__Latescibacteria	c__norank_p__Latescibacteria	o__norank_p__Latescibacteria	f__norank_p__Latescibacteria	g__norank_p__Latescibacteria	s__uncultured_Fibrobacteres_bacterium_g__norank	OTU41	5	2	2	2	0	0	0	2	0	0	0	0	13
d__Bacteria	k__norank_d__Bacteria	p__Proteobacteria	c__Gammaproteobacteria	o__unclassified_c__Gammaproteobacteria	f__unclassified_c__Gammaproteobacteria	g__unclassified_c__Gammaproteobacteria	s__unclassified_c__Gammaproteobacteria	OTU289	1	3	2	7	10	4	0	0	0	0	0	0	27
d__Bacteria	k__norank_d__Bacteria	p__Gemmatimonadetes	c__Gemmatimonadetes	o__Longimicrobiales	f__Longimicrobiaceae	g__norank_f__Longimicrobiaceae	s__unclassified_g__norank_f__Longimicrobiaceae	OTU1046	12	7	6	30	20	16	39	20	19	28	34	6	237
d__Bacteria	k__norank_d__Bacteria	p__Proteobacteria	c__Alphaproteobacteria	o__Rhodospirillales	f__MSB-1E8	g__norank_f__MSB-1E8	s__uncultured_bacterium_g__norank_f__MSB-1E8	OTU2187	52	37	24	45	53	71	123	56	34	4	2	4	505
d__Bacteria	k__norank_d__Bacteria	p__Chloroflexi	c__JG30-KF-CM66	o__norank_c__JG30-KF-CM66	f__norank_c__JG30-KF-CM66	g__norank_c__JG30-KF-CM66	s__uncultured_Chloroflexi_bacterium_g__norank_c__JG30-KF-CM66	OTU1237	9	1	1	6	6	3	11	12	8	1	0	1	59
d__Bacteria	k__norank_d__Bacteria	p__Actinobacteria	c__Actinobacteria	o__Euzebyales	f__Euzebyaceae	g__norank_f__Euzebyaceae	s__uncultured_bacterium_g__norank_f__Euzebyaceae	OTU2650	0	0	0	0	0	4	5	1	1	2	0	2	15
d__Bacteria	k__norank_d__Bacteria	p__Actinobacteria	c__Actinobacteria	o__Frankiales	f__Geodermatophilaceae	g__Blastococcus	s__unclassified_g__Blastococcus	OTU631	4	1	1	12	5	12	8	4	4	124	33	37	245
d__Bacteria	k__norank_d__Bacteria	p__unclassified_k__norank_d__Bacteria	c__unclassified_k__norank_d__Bacteria	o__unclassified_k__norank_d__Bacteria	f__unclassified_k__norank_d__Bacteria	g__unclassified_k__norank_d__Bacteria	s__unclassified_k__norank_d__Bacteria	OTU1049	17	15	10	25	17	1	4	2	1	0	0	0	92
d__Bacteria	k__norank_d__Bacteria	p__Actinobacteria	c__Actinobacteria	o__Acidimicrobiales	f__norank_o__Acidimicrobiales	g__norank_o__Acidimicrobiales	s__bacterium_YC-ZSS-LKJ199	OTU711	0	0	0	1	0	2	1	0	0	5	9	9	27
d__Bacteria	k__norank_d__Bacteria	p__Acidobacteria	c__Acidobacteria	o__Solibacterales	f__Solibacteraceae__Subgroup_3_	g__Candidatus_Solibacter	s__unclassified_g__Candidatus_Solibacter	OTU2128	1	2	1	1	2	0	3	0	1	0	0	0	11
d__Bacteria	k__norank_d__Bacteria	p__Chloroflexi	c__TK10	o__norank_c__TK10	f__norank_c__TK10	g__norank_c__TK10	s__unclassified_g__norank_c__TK10	OTU2323	6	2	1	1	0	0	3	1	1	0	0	0	15
d__Bacteria	k__norank_d__Bacteria	p__Acidobacteria	c__Acidobacteria	o__norank_c__Acidobacteria	f__norank_c__Acidobacteria	g__norank_c__Acidobacteria	s__unclassified_g__norank_c__Acidobacteria	OTU144	8	5	3	10	1	0	2	2	2	0	0	0	33
d__Bacteria	k__norank_d__Bacteria	p__Proteobacteria	c__Deltaproteobacteria	o__Desulfurellales	f__Desulfurellaceae	g__G55	s__uncultured_bacterium_g__G55	OTU1886	3	2	5	1	4	3	9	8	3	0	0	0	38
d__Bacteria	k__norank_d__Bacteria	p__Chloroflexi	c__Chloroflexia	o__Chloroflexales	f__Roseiflexaceae	g__Roseiflexus	s__unclassified_g__Roseiflexus	OTU1551	8	9	0	3	11	0	17	6	2	0	0	0	56
d__Bacteria	k__norank_d__Bacteria	p__Verrucomicrobia	c__Spartobacteria	o__Chthoniobacterales	f__DA101_soil_group	g__norank_f__DA101_soil_group	s__Verrucomicrobia_bacterium_OR-59	OTU3059	2	4	2	7	3	0	0	2	0	0	0	0	20
d__Bacteria	k__norank_d__Bacteria	p__Proteobacteria	c__Deltaproteobacteria	o__Myxococcales	f__norank_o__Myxococcales	g__norank_o__Myxococcales	s__uncultured_Cystobacteraceae_bacterium_g__norank_o__Myxococcales	OTU2916	0	2	0	1	3	1	2	1	1	0	0	0	11
d__Bacteria	k__norank_d__Bacteria	p__Proteobacteria	c__Gammaproteobacteria	o__unclassified_c__Gammaproteobacteria	f__unclassified_c__Gammaproteobacteria	g__unclassified_c__Gammaproteobacteria	s__unclassified_c__Gammaproteobacteria	OTU1747	0	0	0	1	0	0	3	0	0	1	0	0	5
d__Bacteria	k__norank_d__Bacteria	p__Planctomycetes	c__Planctomycetacia	o__Planctomycetales	f__Planctomycetaceae	g__norank_f__Planctomycetaceae	s__unclassified_g__norank_f__Planctomycetaceae	OTU1987	2	2	0	6	1	0	4	0	3	0	0	0	18
d__Bacteria	k__norank_d__Bacteria	p__Proteobacteria	c__Deltaproteobacteria	o__Myxococcales	f__Haliangiaceae	g__Haliangium	s__unclassified_g__Haliangium	OTU1510	3	0	2	10	10	2	21	12	4	3	0	0	67
d__Bacteria	k__norank_d__Bacteria	p__Gemmatimonadetes	c__Gemmatimonadetes	o__Gemmatimonadales	f__Gemmatimonadaceae	g__norank_f__Gemmatimonadaceae	s__uncultured_bacterium_g__norank_f__Gemmatimonadaceae	OTU2740	2	0	2	4	1	3	6	4	1	0	0	1	24
d__Bacteria	k__norank_d__Bacteria	p__Chloroflexi	c__Ardenticatenia	o__Ardenticatenales	f__norank_o__Ardenticatenales	g__norank_o__Ardenticatenales	s__uncultured_bacterium_g__norank_o__Ardenticatenales	OTU2497	3	0	0	1	2	3	3	2	0	0	0	0	14
d__Bacteria	k__norank_d__Bacteria	p__Firmicutes	c__Bacilli	o__Bacillales	f__Bacillaceae	g__unclassified_f__Bacillaceae	s__unclassified_f__Bacillaceae	OTU100	2	1	2	0	0	0	1	0	0	0	0	0	6
d__Bacteria	k__norank_d__Bacteria	p__Actinobacteria	c__Actinobacteria	o__Acidimicrobiales	f__norank_o__Acidimicrobiales	g__norank_o__Acidimicrobiales	s__unclassified_g__norank_o__Acidimicrobiales	OTU873	2	3	1	10	0	5	4	3	5	11	7	4	55
d__Bacteria	k__norank_d__Bacteria	p__Actinobacteria	c__Actinobacteria	o__Micrococcales	f__Micrococcaceae	g__Pseudarthrobacter	s__unclassified_g__Pseudarthrobacter	OTU184	1352	501	603	2186	1527	666	1459	677	1589	4056	2562	2164	19342
d__Bacteria	k__norank_d__Bacteria	p__Proteobacteria	c__Alphaproteobacteria	o__Rhizobiales	f__Phyllobacteriaceae	g__Mesorhizobium	s__unclassified_g__Mesorhizobium	OTU700	15	21	9	16	15	18	14	8	4	113	72	65	370
d__Bacteria	k__norank_d__Bacteria	p__Actinobacteria	c__Actinobacteria	o__Acidimicrobiales	f__norank_o__Acidimicrobiales	g__norank_o__Acidimicrobiales	s__unclassified_g__norank_o__Acidimicrobiales	OTU1663	12	2	6	13	5	7	11	8	7	5	6	7	89
d__Bacteria	k__norank_d__Bacteria	p__Planctomycetes	c__Planctomycetacia	o__Planctomycetales	f__Planctomycetaceae	g__Gemmata	s__unclassified_g__Gemmata	OTU826	0	4	2	4	1	0	2	1	0	0	1	0	15
d__Bacteria	k__norank_d__Bacteria	p__Planctomycetes	c__Planctomycetacia	o__Planctomycetales	f__Planctomycetaceae	g__norank_f__Planctomycetaceae	s__unclassified_g__norank_f__Planctomycetaceae	OTU2988	0	2	0	1	1	0	0	1	3	0	0	0	8
d__Bacteria	k__norank_d__Bacteria	p__Planctomycetes	c__Planctomycetacia	o__Planctomycetales	f__Planctomycetaceae	g__norank_f__Planctomycetaceae	s__unclassified_g__norank_f__Planctomycetaceae	OTU2320	4	6	1	6	3	0	3	4	1	1	0	1	30
d__Bacteria	k__norank_d__Bacteria	p__Actinobacteria	c__Actinobacteria	o__Pseudonocardiales	f__Pseudonocardiaceae	g__Pseudonocardia	s__unclassified_g__Pseudonocardia	OTU869	56	34	20	113	63	64	101	58	44	201	103	72	929
d__Bacteria	k__norank_d__Bacteria	p__Proteobacteria	c__Gammaproteobacteria	o__Oceanospirillales	f__Oceanospirillaceae	g__Pseudohongiella	s__unclassified_g__Pseudohongiella	OTU756	0	0	0	0	0	0	0	0	0	1	2	7	10
d__Bacteria	k__norank_d__Bacteria	p__Planctomycetes	c__Planctomycetacia	o__Planctomycetales	f__Planctomycetaceae	g__norank_f__Planctomycetaceae	s__unclassified_g__norank_f__Planctomycetaceae	OTU2987	3	2	0	2	2	0	0	0	0	1	0	0	10
d__Bacteria	k__norank_d__Bacteria	p__Chloroflexi	c__Anaerolineae	o__Anaerolineales	f__Anaerolineaceae	g__norank_f__Anaerolineaceae	s__uncultured_Gemmatimonadetes_bacterium_g__norank_f__Anaerolineaceae	OTU2505	3	3	3	3	4	1	13	4	2	0	0	0	36
d__Bacteria	k__norank_d__Bacteria	p__Actinobacteria	c__Actinobacteria	o__Acidimicrobiales	f__Iamiaceae	g__Iamia	s__unclassified_g__Iamia	OTU2451	9	5	8	7	7	13	23	12	9	3	1	3	100
d__Bacteria	k__norank_d__Bacteria	p__Proteobacteria	c__Deltaproteobacteria	o__Myxococcales	f__Polyangiaceae	g__Sorangium	s__unclassified_g__Sorangium	OTU3224	1	0	0	5	3	2	1	1	1	0	1	0	15
d__Bacteria	k__norank_d__Bacteria	p__Proteobacteria	c__Alphaproteobacteria	o__Rhizobiales	f__unclassified_o__Rhizobiales	g__unclassified_o__Rhizobiales	s__unclassified_o__Rhizobiales	OTU2685	136	76	100	195	119	180	200	124	95	182	135	121	1663
d__Bacteria	k__norank_d__Bacteria	p__Proteobacteria	c__Deltaproteobacteria	o__Oligoflexales	f__0319-6G20	g__norank_f__0319-6G20	s__uncultured_Syntrophobacteraceae_bacterium_g__norank_f__0319-6G20	OTU2276	3	0	1	3	4	3	5	4	2	0	0	2	27
d__Bacteria	k__norank_d__Bacteria	p__Firmicutes	c__Bacilli	o__Bacillales	f__Planococcaceae	g__unclassified_f__Planococcaceae	s__unclassified_f__Planococcaceae	OTU2011	25	16	7	32	23	32	25	12	8	27	31	29	267
d__Bacteria	k__norank_d__Bacteria	p__Proteobacteria	c__Gammaproteobacteria	o__Xanthomonadales	f__Xanthomonadaceae	g__Pseudoxanthomonas	s__Pseudoxanthomonas_dokdonensis	OTU909	3	7	2	32	7	4	1	5	1	33	58	7	160
d__Bacteria	k__norank_d__Bacteria	p__Acidobacteria	c__Acidobacteria	o__norank_c__Acidobacteria	f__norank_c__Acidobacteria	g__norank_c__Acidobacteria	s__unclassified_g__norank_c__Acidobacteria	OTU367	18	18	6	24	11	3	13	14	6	0	0	1	114
d__Bacteria	k__norank_d__Bacteria	p__Proteobacteria	c__Deltaproteobacteria	o__Myxococcales	f__Polyangiaceae	g__Jahnella	s__Jahnella_thaxteri	OTU903	0	1	0	0	2	7	0	2	0	2	2	2	18
d__Bacteria	k__norank_d__Bacteria	p__Bacteroidetes	c__Sphingobacteriia	o__Sphingobacteriales	f__AKYH767	g__norank_f__AKYH767	s__unclassified_g__norank_f__AKYH767	OTU2379	2	1	3	2	4	0	6	1	0	1	0	1	21
d__Bacteria	k__norank_d__Bacteria	p__Actinobacteria	c__Actinobacteria	o__unclassified_c__Actinobacteria	f__unclassified_c__Actinobacteria	g__unclassified_c__Actinobacteria	s__unclassified_c__Actinobacteria	OTU2302	7	1	1	11	3	3	24	8	7	13	7	10	95
d__Bacteria	k__norank_d__Bacteria	p__Planctomycetes	c__Planctomycetacia	o__Planctomycetales	f__Planctomycetaceae	g__norank_f__Planctomycetaceae	s__unclassified_g__norank_f__Planctomycetaceae	OTU1185	2	1	1	5	0	0	4	1	2	0	0	0	16
d__Bacteria	k__norank_d__Bacteria	p__Planctomycetes	c__Planctomycetacia	o__Planctomycetales	f__Planctomycetaceae	g__unclassified_f__Planctomycetaceae	s__unclassified_f__Planctomycetaceae	OTU414	1	3	2	3	1	0	0	2	2	1	0	0	15
d__Bacteria	k__norank_d__Bacteria	p__Chloroflexi	c__Chloroflexia	o__Kallotenuales	f__AKIW781	g__norank_f__AKIW781	s__uncultured_bacterium_g__norank_f__AKIW781	OTU3067	0	1	0	2	5	5	0	0	0	0	0	0	13
d__Bacteria	k__norank_d__Bacteria	p__Proteobacteria	c__Alphaproteobacteria	o__Rhizobiales	f__unclassified_o__Rhizobiales	g__unclassified_o__Rhizobiales	s__unclassified_o__Rhizobiales	OTU2757	22	5	5	22	22	15	36	22	26	10	4	4	193
d__Bacteria	k__norank_d__Bacteria	p__Actinobacteria	c__Actinobacteria	o__Gaiellales	f__norank_o__Gaiellales	g__norank_o__Gaiellales	s__unclassified_g__norank_o__Gaiellales	OTU2834	10	4	2	3	4	5	45	19	17	4	5	4	122
d__Bacteria	k__norank_d__Bacteria	p__Acidobacteria	c__Acidobacteria	o__Blastocatellales	f__Blastocatellaceae__Subgroup_4_	g__norank_f__Blastocatellaceae__Subgroup_4_	s__unclassified_g__norank_f__Blastocatellaceae__Subgroup_4_	OTU2449	92	47	49	107	45	2	73	88	32	2	1	4	542
d__Bacteria	k__norank_d__Bacteria	p__Proteobacteria	c__Deltaproteobacteria	o__Bdellovibrionales	f__Bdellovibrionaceae	g__OM27_clade	s__unclassified_g__OM27_clade	OTU3020	1	0	0	3	2	0	0	0	0	0	0	0	6
d__Bacteria	k__norank_d__Bacteria	p__Proteobacteria	c__Alphaproteobacteria	o__Rhizobiales	f__JG35-K1-AG5	g__norank_f__JG35-K1-AG5	s__uncultured_bacterium_g__norank_f__JG35-K1-AG5	OTU107	2	3	9	0	0	0	1	1	0	0	0	0	16
d__Bacteria	k__norank_d__Bacteria	p__Proteobacteria	c__Betaproteobacteria	o__Burkholderiales	f__Oxalobacteraceae	g__Massilia	s__unclassified_g__Massilia	OTU2739	33	31	88	23	31	40	50	31	21	109	82	171	710
d__Bacteria	k__norank_d__Bacteria	p__Proteobacteria	c__Alphaproteobacteria	o__Rhodospirillales	f__Acetobacteraceae	g__Roseomonas	s__unclassified_g__Roseomonas	OTU853	0	0	0	0	0	0	0	0	0	5	8	5	18
d__Bacteria	k__norank_d__Bacteria	p__Actinobacteria	c__Actinobacteria	o__Acidimicrobiales	f__norank_o__Acidimicrobiales	g__norank_o__Acidimicrobiales	s__unclassified_g__norank_o__Acidimicrobiales	OTU2894	12	7	7	37	16	15	20	9	11	3	2	2	141
d__Bacteria	k__norank_d__Bacteria	p__Elusimicrobia	c__Elusimicrobia	o__Lineage_IIa	f__norank_o__Lineage_IIa	g__norank_o__Lineage_IIa	s__unclassified_g__norank_o__Lineage_IIa	OTU3087	2	0	0	1	0	0	0	0	1	0	0	0	4
d__Bacteria	k__norank_d__Bacteria	p__Proteobacteria	c__Deltaproteobacteria	o__Myxococcales	f__Phaselicystidaceae	g__Phaselicystis	s__Myxobacteria_bacterium_UTMC_4097	OTU240	2	1	1	0	0	4	6	0	2	0	0	0	16
d__Bacteria	k__norank_d__Bacteria	p__Proteobacteria	c__Gammaproteobacteria	o__Pseudomonadales	f__Moraxellaceae	g__Acinetobacter	s__unclassified_g__Acinetobacter	OTU538	1	0	0	1	0	0	0	0	0	6	3	1	12
d__Bacteria	k__norank_d__Bacteria	p__Acidobacteria	c__Acidobacteria	o__norank_c__Acidobacteria	f__norank_c__Acidobacteria	g__norank_c__Acidobacteria	s__unclassified_g__norank_c__Acidobacteria	OTU215	5	1	1	10	2	1	1	2	1	2	0	2	28
d__Bacteria	k__norank_d__Bacteria	p__Armatimonadetes	c__norank_p__Armatimonadetes	o__norank_p__Armatimonadetes	f__norank_p__Armatimonadetes	g__norank_p__Armatimonadetes	s__unclassified_g__norank_p__Armatimonadetes	OTU1240	1	2	0	0	2	1	1	2	1	0	0	0	10
d__Bacteria	k__norank_d__Bacteria	p__Firmicutes	c__Bacilli	o__Bacillales	f__Bacillaceae	g__unclassified_f__Bacillaceae	s__unclassified_f__Bacillaceae	OTU1286	0	0	0	2	1	1	1	2	1	0	0	0	8
d__Bacteria	k__norank_d__Bacteria	p__Proteobacteria	c__Alphaproteobacteria	o__Caulobacterales	f__Caulobacteraceae	g__norank_f__Caulobacteraceae	s__uncultured_endolithic_bacterium_g__norank_f__Caulobacteraceae	OTU1613	1	0	0	1	2	3	16	8	5	15	5	4	60
d__Bacteria	k__norank_d__Bacteria	p__Proteobacteria	c__Alphaproteobacteria	o__Rhizobiales	f__Hyphomicrobiaceae	g__Hyphomicrobium	s__uncultured_Hyphomicrobiaceae_bacterium_g__Hyphomicrobium	OTU2541	53	37	44	84	56	82	50	45	38	73	70	63	695
d__Bacteria	k__norank_d__Bacteria	p__Proteobacteria	c__Betaproteobacteria	o__SC-I-84	f__norank_o__SC-I-84	g__norank_o__SC-I-84	s__unclassified_g__norank_o__SC-I-84	OTU23	3	12	3	14	11	38	2	0	0	0	0	0	83
d__Bacteria	k__norank_d__Bacteria	p__Actinobacteria	c__Actinobacteria	o__norank_c__Actinobacteria	f__norank_c__Actinobacteria	g__norank_c__Actinobacteria	s__uncultured_Actinomycetales_bacterium_g__norank_c__Actinobacteria	OTU1005	35	5	18	4	5	1	3	3	4	1	1	5	85
d__Bacteria	k__norank_d__Bacteria	p__Chloroflexi	c__Caldilineae	o__Caldilineales	f__Caldilineaceae	g__norank_f__Caldilineaceae	s__uncultured_bacterium_g__norank_f__Caldilineaceae	OTU28	8	36	12	9	24	16	5	3	1	13	5	2	134
d__Bacteria	k__norank_d__Bacteria	p__Elusimicrobia	c__Elusimicrobia	o__Lineage_IIa	f__norank_o__Lineage_IIa	g__norank_o__Lineage_IIa	s__unclassified_g__norank_o__Lineage_IIa	OTU581	1	0	1	0	0	0	0	0	0	1	0	0	3
d__Bacteria	k__norank_d__Bacteria	p__Bacteroidetes	c__Bacteroidetes_Incertae_Sedis	o__Order_II	f__Rhodothermaceae	g__norank_f__Rhodothermaceae	s__unclassified_g__norank_f__Rhodothermaceae	OTU2015	0	1	0	0	1	0	1	1	0	1	0	0	5
d__Bacteria	k__norank_d__Bacteria	p__Actinobacteria	c__Actinobacteria	o__Acidimicrobiales	f__Acidimicrobiaceae	g__norank_f__Acidimicrobiaceae	s__unclassified_g__norank_f__Acidimicrobiaceae	OTU3159	11	11	8	25	8	15	19	16	14	13	11	9	160
d__Bacteria	k__norank_d__Bacteria	p__unclassified_k__norank_d__Bacteria	c__unclassified_k__norank_d__Bacteria	o__unclassified_k__norank_d__Bacteria	f__unclassified_k__norank_d__Bacteria	g__unclassified_k__norank_d__Bacteria	s__unclassified_k__norank_d__Bacteria	OTU2394	1	0	0	0	1	0	3	1	0	0	0	0	6
d__Bacteria	k__norank_d__Bacteria	p__Chloroflexi	c__Chloroflexia	o__Chloroflexales	f__unclassified_o__Chloroflexales	g__unclassified_o__Chloroflexales	s__unclassified_o__Chloroflexales	OTU1099	0	0	0	1	0	0	2	1	5	0	0	0	9
d__Bacteria	k__norank_d__Bacteria	p__Chloroflexi	c__TK10	o__norank_c__TK10	f__norank_c__TK10	g__norank_c__TK10	s__uncultured_bacterium_g__norank_c__TK10	OTU118	1	1	2	1	4	2	1	7	2	1	0	0	22
d__Bacteria	k__norank_d__Bacteria	p__Chloroflexi	c__Caldilineae	o__Caldilineales	f__Caldilineaceae	g__Litorilinea	s__uncultured_bacterium_g__Litorilinea	OTU2995	0	8	0	1	1	0	0	0	0	1	0	0	11
d__Bacteria	k__norank_d__Bacteria	p__Gemmatimonadetes	c__Gemmatimonadetes	o__norank_c__Gemmatimonadetes	f__norank_c__Gemmatimonadetes	g__norank_c__Gemmatimonadetes	s__unclassified_g__norank_c__Gemmatimonadetes	OTU2912	0	1	1	1	7	8	2	3	2	8	5	5	43
d__Bacteria	k__norank_d__Bacteria	p__Proteobacteria	c__Deltaproteobacteria	o__Desulfurellales	f__Desulfurellaceae	g__H16	s__uncultured_Desulfuromonas_sp._g__H16	OTU3024	12	3	6	27	8	22	6	4	7	1	0	2	98
d__Bacteria	k__norank_d__Bacteria	p__Actinobacteria	c__Actinobacteria	o__norank_c__Actinobacteria	f__norank_c__Actinobacteria	g__norank_c__Actinobacteria	s__uncultured_bacterium_g__norank_c__Actinobacteria	OTU821	0	0	0	0	0	0	0	0	0	0	2	1	3
d__Bacteria	k__norank_d__Bacteria	p__Chloroflexi	c__Chloroflexia	o__Chloroflexales	f__Roseiflexaceae	g__Roseiflexus	s__unclassified_g__Roseiflexus	OTU2168	164	97	65	78	136	30	111	80	75	3	3	0	842
d__Bacteria	k__norank_d__Bacteria	p__Chloroflexi	c__Chloroflexia	o__Chloroflexales	f__unclassified_o__Chloroflexales	g__unclassified_o__Chloroflexales	s__unclassified_o__Chloroflexales	OTU1325	4	2	2	7	7	0	9	18	5	0	0	0	54
d__Bacteria	k__norank_d__Bacteria	p__Actinobacteria	c__Actinobacteria	o__Solirubrobacterales	f__Elev-16S-1332	g__norank_f__Elev-16S-1332	s__uncultured_Rubrobacteria_bacterium_g__norank_f__Elev-16S-1332	OTU2335	5	4	4	5	15	10	6	6	1	4	0	0	60
d__Bacteria	k__norank_d__Bacteria	p__Firmicutes	c__Bacilli	o__Bacillales	f__Bacillaceae	g__Bacillus	s__unclassified_g__Bacillus	OTU2209	129	73	42	112	118	126	259	81	105	29	20	35	1129
d__Bacteria	k__norank_d__Bacteria	p__Chloroflexi	c__Anaerolineae	o__Anaerolineales	f__Anaerolineaceae	g__norank_f__Anaerolineaceae	s__unclassified_g__norank_f__Anaerolineaceae	OTU1030	15	9	3	3	2	2	8	4	4	1	0	0	51
d__Bacteria	k__norank_d__Bacteria	p__unclassified_k__norank_d__Bacteria	c__unclassified_k__norank_d__Bacteria	o__unclassified_k__norank_d__Bacteria	f__unclassified_k__norank_d__Bacteria	g__unclassified_k__norank_d__Bacteria	s__unclassified_k__norank_d__Bacteria	OTU2727	30	32	14	16	23	14	65	26	19	17	12	11	279
d__Bacteria	k__norank_d__Bacteria	p__Armatimonadetes	c__norank_p__Armatimonadetes	o__norank_p__Armatimonadetes	f__norank_p__Armatimonadetes	g__norank_p__Armatimonadetes	s__unclassified_g__norank_p__Armatimonadetes	OTU371	0	2	1	1	0	1	0	1	1	0	0	0	7
d__Bacteria	k__norank_d__Bacteria	p__Chloroflexi	c__Anaerolineae	o__Anaerolineales	f__Anaerolineaceae	g__norank_f__Anaerolineaceae	s__unclassified_g__norank_f__Anaerolineaceae	OTU1814	2	7	0	2	7	0	5	0	2	0	0	2	27
d__Bacteria	k__norank_d__Bacteria	p__Chloroflexi	c__Thermomicrobia	o__JG30-KF-CM45	f__norank_o__JG30-KF-CM45	g__norank_o__JG30-KF-CM45	s__unclassified_g__norank_o__JG30-KF-CM45	OTU2639	0	0	0	0	1	1	1	1	0	0	0	0	4
d__Bacteria	k__norank_d__Bacteria	p__Proteobacteria	c__Alphaproteobacteria	o__Rhizobiales	f__JG34-KF-361	g__norank_f__JG34-KF-361	s__uncultured_proteobacterium_g__norank_f__JG34-KF-361	OTU2721	15	1	3	10	10	11	32	10	11	7	4	4	118
d__Bacteria	k__norank_d__Bacteria	p__Planctomycetes	c__Planctomycetacia	o__Planctomycetales	f__Planctomycetaceae	g__norank_f__Planctomycetaceae	s__unclassified_g__norank_f__Planctomycetaceae	OTU220	4	0	0	0	0	0	0	1	1	0	0	0	6
d__Bacteria	k__norank_d__Bacteria	p__Planctomycetes	c__Planctomycetacia	o__Planctomycetales	f__Planctomycetaceae	g__norank_f__Planctomycetaceae	s__unclassified_g__norank_f__Planctomycetaceae	OTU221	1	0	0	3	0	0	0	0	0	0	0	0	4
d__Bacteria	k__norank_d__Bacteria	p__Acidobacteria	c__Acidobacteria	o__Solibacterales	f__Solibacteraceae__Subgroup_3_	g__Bryobacter	s__unclassified_g__Bryobacter	OTU1265	0	0	0	1	1	0	0	2	0	0	0	0	4
d__Bacteria	k__norank_d__Bacteria	p__Planctomycetes	c__Planctomycetacia	o__Planctomycetales	f__Planctomycetaceae	g__norank_f__Planctomycetaceae	s__unclassified_g__norank_f__Planctomycetaceae	OTU224	1	1	1	2	0	0	1	0	1	2	1	1	11
d__Bacteria	k__norank_d__Bacteria	p__Bacteroidetes	c__Cytophagia	o__Cytophagales	f__Cytophagaceae	g__unclassified_f__Cytophagaceae	s__unclassified_f__Cytophagaceae	OTU1750	1	0	0	0	5	1	13	11	3	0	0	0	34
d__Bacteria	k__norank_d__Bacteria	p__Gemmatimonadetes	c__Gemmatimonadetes	o__norank_c__Gemmatimonadetes	f__norank_c__Gemmatimonadetes	g__norank_c__Gemmatimonadetes	s__unclassified_g__norank_c__Gemmatimonadetes	OTU1488	20	25	14	39	30	20	52	13	10	4	1	0	228
d__Bacteria	k__norank_d__Bacteria	p__Proteobacteria	c__Deltaproteobacteria	o__Myxococcales	f__Haliangiaceae	g__Haliangium	s__uncultured_bacterium_g__Haliangium	OTU2934	3	1	1	13	4	10	8	4	4	6	2	2	58
d__Bacteria	k__norank_d__Bacteria	p__Chloroflexi	c__Chloroflexia	o__Kallotenuales	f__AKIW781	g__norank_f__AKIW781	s__uncultured_bacterium_g__norank_f__AKIW781	OTU1017	8	7	6	8	14	9	9	17	7	0	0	1	86
d__Bacteria	k__norank_d__Bacteria	p__Actinobacteria	c__Actinobacteria	o__Acidimicrobiales	f__norank_o__Acidimicrobiales	g__norank_o__Acidimicrobiales	s__unclassified_g__norank_o__Acidimicrobiales	OTU518	0	0	0	0	0	0	0	0	0	9	5	8	22
d__Bacteria	k__norank_d__Bacteria	p__Planctomycetes	c__Phycisphaerae	o__Tepidisphaerales	f__Tepidisphaeraceae	g__norank_f__Tepidisphaeraceae	s__unclassified_g__norank_f__Tepidisphaeraceae	OTU1879	59	46	27	215	43	4	52	38	36	7	2	3	532
d__Bacteria	k__norank_d__Bacteria	p__Verrucomicrobia	c__OPB35_soil_group	o__norank_c__OPB35_soil_group	f__norank_c__OPB35_soil_group	g__norank_c__OPB35_soil_group	s__uncultured_subdivision_3_bacterium	OTU2403	9	2	4	11	3	0	28	11	5	0	0	0	73
d__Bacteria	k__norank_d__Bacteria	p__Chloroflexi	c__S085	o__norank_c__S085	f__norank_c__S085	g__norank_c__S085	s__uncultured_Chloroflexi_bacterium_g__norank_c__S085	OTU54	33	7	9	21	16	14	15	17	17	4	1	9	163
d__Bacteria	k__norank_d__Bacteria	p__Actinobacteria	c__Actinobacteria	o__Solirubrobacterales	f__Elev-16S-1332	g__norank_f__Elev-16S-1332	s__uncultured_bacterium_g__norank_f__Elev-16S-1332	OTU2088	20	3	4	3	9	2	36	20	19	10	4	12	142
d__Bacteria	k__norank_d__Bacteria	p__Chloroflexi	c__Thermomicrobia	o__JG30-KF-CM45	f__norank_o__JG30-KF-CM45	g__norank_o__JG30-KF-CM45	s__uncultured_Chloroflexi_bacterium_g__norank_o__JG30-KF-CM45	OTU654	3	7	1	1	2	5	1	1	4	63	30	34	152
d__Bacteria	k__norank_d__Bacteria	p__unclassified_k__norank_d__Bacteria	c__unclassified_k__norank_d__Bacteria	o__unclassified_k__norank_d__Bacteria	f__unclassified_k__norank_d__Bacteria	g__unclassified_k__norank_d__Bacteria	s__unclassified_k__norank_d__Bacteria	OTU2830	2	1	0	2	2	0	2	5	3	1	0	0	18
d__Bacteria	k__norank_d__Bacteria	p__Actinobacteria	c__Actinobacteria	o__Gaiellales	f__norank_o__Gaiellales	g__norank_o__Gaiellales	s__unclassified_g__norank_o__Gaiellales	OTU2205	15	7	9	14	20	24	70	42	53	12	2	4	272
d__Bacteria	k__norank_d__Bacteria	p__Acidobacteria	c__Acidobacteria	o__Blastocatellales	f__Blastocatellaceae__Subgroup_4_	g__Stenotrophobacter	s__uncultured_soil_bacterium_g__Stenotrophobacter	OTU1354	4	1	2	1	2	0	7	4	2	2	0	0	25
d__Bacteria	k__norank_d__Bacteria	p__Proteobacteria	c__Deltaproteobacteria	o__Oligoflexales	f__Oligoflexaceae	g__norank_f__Oligoflexaceae	s__uncultured_soil_bacterium_g__norank_f__Oligoflexaceae	OTU3053	0	1	0	1	0	1	0	0	0	1	0	0	4
d__Bacteria	k__norank_d__Bacteria	p__Actinobacteria	c__Actinobacteria	o__Acidimicrobiales	f__Iamiaceae	g__Iamia	s__uncultured_bacterium_g__Iamia	OTU1686	32	33	29	83	90	93	75	27	30	13	7	8	520
d__Bacteria	k__norank_d__Bacteria	p__Firmicutes	c__Bacilli	o__Bacillales	f__Alicyclobacillaceae	g__Tumebacillus	s__unclassified_g__Tumebacillus	OTU124	4	4	9	6	5	27	8	9	9	6	0	1	88
d__Bacteria	k__norank_d__Bacteria	p__Planctomycetes	c__Planctomycetacia	o__Planctomycetales	f__Planctomycetaceae	g__norank_f__Planctomycetaceae	s__unclassified_g__norank_f__Planctomycetaceae	OTU132	1	1	1	0	0	0	0	0	1	0	0	0	4
d__Bacteria	k__norank_d__Bacteria	p__Chloroflexi	c__unclassified_p__Chloroflexi	o__unclassified_p__Chloroflexi	f__unclassified_p__Chloroflexi	g__unclassified_p__Chloroflexi	s__unclassified_p__Chloroflexi	OTU550	4	3	1	6	4	0	3	3	0	10	4	4	42
d__Bacteria	k__norank_d__Bacteria	p__Chloroflexi	c__Chloroflexia	o__Chloroflexales	f__Chloroflexaceae	g__Chloronema	s__uncultured_bacterium_g__Chloronema	OTU1805	5	4	3	4	9	3	7	8	9	0	0	0	52
d__Bacteria	k__norank_d__Bacteria	p__Chloroflexi	c__Thermomicrobia	o__JG30-KF-CM45	f__norank_o__JG30-KF-CM45	g__norank_o__JG30-KF-CM45	s__unclassified_g__norank_o__JG30-KF-CM45	OTU2706	6	2	3	2	2	1	23	19	44	0	0	0	102
d__Bacteria	k__norank_d__Bacteria	p__Actinobacteria	c__Actinobacteria	o__Gaiellales	f__norank_o__Gaiellales	g__norank_o__Gaiellales	s__unidentified_marine_bacterioplankton_g__norank	OTU1778	2	2	1	2	0	1	9	4	9	0	1	0	31
d__Bacteria	k__norank_d__Bacteria	p__Chloroflexi	c__Ktedonobacteria	o__C0119	f__norank_o__C0119	g__norank_o__C0119	s__unclassified_g__norank_o__C0119	OTU1559	45	10	9	4	6	1	13	22	7	3	1	1	122
d__Bacteria	k__norank_d__Bacteria	p__Gemmatimonadetes	c__Gemmatimonadetes	o__Longimicrobiales	f__Longimicrobiaceae	g__norank_f__Longimicrobiaceae	s__unclassified_g__norank_f__Longimicrobiaceae	OTU2983	0	2	0	4	3	0	0	0	0	0	0	0	9
d__Bacteria	k__norank_d__Bacteria	p__Actinobacteria	c__Actinobacteria	o__Acidimicrobiales	f__norank_o__Acidimicrobiales	g__norank_o__Acidimicrobiales	s__unclassified_g__norank_o__Acidimicrobiales	OTU1447	2	3	7	14	3	3	0	3	0	0	0	0	35
d__Bacteria	k__norank_d__Bacteria	p__Chloroflexi	c__Thermomicrobia	o__JG30-KF-CM45	f__norank_o__JG30-KF-CM45	g__norank_o__JG30-KF-CM45	s__uncultured_bacterium_g__norank_o__JG30-KF-CM45	OTU2679	5	12	0	0	4	5	3	3	4	0	1	0	37
d__Bacteria	k__norank_d__Bacteria	p__Proteobacteria	c__Alphaproteobacteria	o__Sphingomonadales	f__Sphingomonadaceae	g__Sphingobium	s__unclassified_g__Sphingobium	OTU14	0	2	1	2	0	0	0	0	0	0	0	0	5
d__Bacteria	k__norank_d__Bacteria	p__Actinobacteria	c__Actinobacteria	o__Propionibacteriales	f__Nocardioidaceae	g__Nocardioides	s__unclassified_g__Nocardioides	OTU1334	10	4	14	9	10	17	18	27	14	14	6	26	169
d__Bacteria	k__norank_d__Bacteria	p__Firmicutes	c__Bacilli	o__Bacillales	f__Planococcaceae	g__unclassified_f__Planococcaceae	s__unclassified_f__Planococcaceae	OTU835	73	146	13	82	94	105	61	32	35	20	18	15	694
d__Bacteria	k__norank_d__Bacteria	p__Actinobacteria	c__Actinobacteria	o__norank_c__Actinobacteria	f__norank_c__Actinobacteria	g__norank_c__Actinobacteria	s__uncultured_bacterium_0425-2M17	OTU1853	7	1	0	1	0	0	2	3	1	0	0	0	15
d__Bacteria	k__norank_d__Bacteria	p__Actinobacteria	c__Actinobacteria	o__Solirubrobacterales	f__unclassified_o__Solirubrobacterales	g__unclassified_o__Solirubrobacterales	s__unclassified_o__Solirubrobacterales	OTU188	2	0	2	2	1	1	0	0	0	0	0	0	8
d__Bacteria	k__norank_d__Bacteria	p__Cyanobacteria	c__Cyanobacteria	o__SubsectionIII	f__FamilyI_o__SubsectionIII	g__norank_f__FamilyI_o__SubsectionIII	s__Oscillatoriales_cyanobacterium_KSU-AQIQ-8	OTU96	0	1	12	0	0	0	1	6	0	0	0	0	20
d__Bacteria	k__norank_d__Bacteria	p__Proteobacteria	c__Alphaproteobacteria	o__Rhizobiales	f__unclassified_o__Rhizobiales	g__unclassified_o__Rhizobiales	s__unclassified_o__Rhizobiales	OTU898	10	8	7	4	2	4	10	3	0	20	19	16	103
d__Bacteria	k__norank_d__Bacteria	p__Proteobacteria	c__Deltaproteobacteria	o__Myxococcales	f__BIrii41	g__norank_f__BIrii41	s__uncultured_bacterium_g__norank_f__BIrii41	OTU1728	2	0	2	1	2	1	7	3	0	0	0	0	18
d__Bacteria	k__norank_d__Bacteria	p__Nitrospirae	c__Nitrospira	o__norank_c__Nitrospira	f__norank_c__Nitrospira	g__Nitrospira	s__unclassified_g__Nitrospira	OTU402	1	5	3	0	1	1	2	1	0	0	0	0	14
d__Bacteria	k__norank_d__Bacteria	p__Actinobacteria	c__Actinobacteria	o__unclassified_c__Actinobacteria	f__unclassified_c__Actinobacteria	g__unclassified_c__Actinobacteria	s__unclassified_c__Actinobacteria	OTU2874	13	2	2	10	7	3	17	17	9	9	3	5	97
d__Bacteria	k__norank_d__Bacteria	p__Chloroflexi	c__SAR202_clade	o__norank_c__SAR202_clade	f__norank_c__SAR202_clade	g__norank_c__SAR202_clade	s__unclassified_g__norank_c__SAR202_clade	OTU1612	1	4	0	2	3	1	5	6	2	0	0	0	24
d__Bacteria	k__norank_d__Bacteria	p__Acidobacteria	c__Acidobacteria	o__Blastocatellales	f__Blastocatellaceae__Subgroup_4_	g__Stenotrophobacter	s__unclassified_g__Stenotrophobacter	OTU440	5	5	1	20	8	0	2	0	1	1	1	1	45
d__Bacteria	k__norank_d__Bacteria	p__Chloroflexi	c__Chloroflexia	o__Chloroflexales	f__Roseiflexaceae	g__Roseiflexus	s__uncultured_Chloroflexi_bacterium_g__Roseiflexus	OTU279	1	0	0	0	0	2	0	2	2	0	0	0	7
d__Bacteria	k__norank_d__Bacteria	p__Planctomycetes	c__Planctomycetacia	o__Planctomycetales	f__Planctomycetaceae	g__norank_f__Planctomycetaceae	s__uncultured_bacterium_g__norank_f__Planctomycetaceae	OTU2597	23	7	7	9	8	0	11	5	11	4	1	1	87
d__Bacteria	k__norank_d__Bacteria	p__Verrucomicrobia	c__OPB35_soil_group	o__norank_c__OPB35_soil_group	f__norank_c__OPB35_soil_group	g__norank_c__OPB35_soil_group	s__unclassified_g__norank_c__OPB35_soil_group	OTU1990	2	0	2	0	1	0	2	0	3	0	0	0	10
d__Bacteria	k__norank_d__Bacteria	p__Planctomycetes	c__Planctomycetacia	o__Planctomycetales	f__Planctomycetaceae	g__norank_f__Planctomycetaceae	s__uncultured_bacterium_g__norank_f__Planctomycetaceae	OTU2594	9	1	0	4	3	1	7	3	4	1	0	0	33
d__Bacteria	k__norank_d__Bacteria	p__Verrucomicrobia	c__OPB35_soil_group	o__norank_c__OPB35_soil_group	f__norank_c__OPB35_soil_group	g__norank_c__OPB35_soil_group	s__unclassified_g__norank_c__OPB35_soil_group	OTU1995	0	1	2	7	5	1	9	2	1	0	0	0	28
d__Bacteria	k__norank_d__Bacteria	p__Proteobacteria	c__Alphaproteobacteria	o__Rhizobiales	f__Phyllobacteriaceae	g__Mesorhizobium	s__Mesorhizobium_alhagi	OTU1850	38	87	18	108	139	110	46	29	11	116	72	90	864
d__Bacteria	k__norank_d__Bacteria	p__Proteobacteria	c__Alphaproteobacteria	o__Rhodobacterales	f__Rhodobacteraceae	g__unclassified_f__Rhodobacteraceae	s__unclassified_f__Rhodobacteraceae	OTU484	1	5	3	15	9	17	1	3	1	1	2	3	61
d__Bacteria	k__norank_d__Bacteria	p__Proteobacteria	c__Deltaproteobacteria	o__Myxococcales	f__Polyangiaceae	g__norank_f__Polyangiaceae	s__unclassified_g__norank_f__Polyangiaceae	OTU1878	0	3	1	8	0	1	4	8	0	0	0	1	26
d__Bacteria	k__norank_d__Bacteria	p__Actinobacteria	c__Actinobacteria	o__Solirubrobacterales	f__FFCH13075	g__norank_f__FFCH13075	s__uncultured_bacterium_g__norank_f__FFCH13075	OTU1709	4	2	5	17	17	13	18	4	7	19	9	6	121
d__Bacteria	k__norank_d__Bacteria	p__Proteobacteria	c__Deltaproteobacteria	o__Myxococcales	f__BIrii41	g__norank_f__BIrii41	s__uncultured_bacterium_g__norank_f__BIrii41	OTU2564	2	1	1	0	0	1	6	2	1	2	2	0	18
d__Bacteria	k__norank_d__Bacteria	p__Nitrospirae	c__Nitrospira	o__norank_c__Nitrospira	f__norank_c__Nitrospira	g__Nitrospira	s__unclassified_g__Nitrospira	OTU64	13	6	8	3	4	9	1	12	5	1	1	0	63
d__Bacteria	k__norank_d__Bacteria	p__Cyanobacteria	c__Cyanobacteria	o__SubsectionIII	f__FamilyI_o__SubsectionIII	g__norank_f__FamilyI_o__SubsectionIII	s__uncultured_soil_bacterium_g__norank_f__FamilyI	OTU1531	0	0	1	0	0	0	7	1	2	0	0	0	11
d__Bacteria	k__norank_d__Bacteria	p__Actinobacteria	c__Actinobacteria	o__Solirubrobacterales	f__0319-6M6	g__norank_f__0319-6M6	s__uncultured_bacterium_g__norank_f__0319-6M6	OTU1869	9	2	1	6	3	6	37	11	16	2	1	1	95
d__Bacteria	k__norank_d__Bacteria	p__Chloroflexi	c__Ardenticatenia	o__Ardenticatenales	f__norank_o__Ardenticatenales	g__norank_o__Ardenticatenales	s__unclassified_g__norank_o__Ardenticatenales	OTU427	2	1	0	1	3	0	0	0	0	0	0	0	7
d__Bacteria	k__norank_d__Bacteria	p__Proteobacteria	c__Alphaproteobacteria	o__Sphingomonadales	f__Sphingomonadaceae	g__Sphingomonas	s__unclassified_g__Sphingomonas	OTU1241	16	9	6	12	10	6	6	4	5	6	1	5	86
d__Bacteria	k__norank_d__Bacteria	p__Actinobacteria	c__Actinobacteria	o__Micromonosporales	f__Micromonosporaceae	g__Actinoplanes	s__unclassified_g__Actinoplanes	OTU2839	24	13	20	9	3	23	32	24	27	14	4	23	216
d__Bacteria	k__norank_d__Bacteria	p__unclassified_k__norank_d__Bacteria	c__unclassified_k__norank_d__Bacteria	o__unclassified_k__norank_d__Bacteria	f__unclassified_k__norank_d__Bacteria	g__unclassified_k__norank_d__Bacteria	s__unclassified_k__norank_d__Bacteria	OTU2907	2	0	0	1	0	1	0	0	0	0	0	0	4
d__Bacteria	k__norank_d__Bacteria	p__Gemmatimonadetes	c__Gemmatimonadetes	o__Gemmatimonadales	f__Gemmatimonadaceae	g__norank_f__Gemmatimonadaceae	s__unclassified_g__norank_f__Gemmatimonadaceae	OTU2752	75	53	37	50	36	52	102	64	46	4	0	0	519
d__Bacteria	k__norank_d__Bacteria	p__Proteobacteria	c__Alphaproteobacteria	o__Rhizobiales	f__DUNssu044	g__norank_f__DUNssu044	s__unclassified_g__norank_f__DUNssu044	OTU1633	11	4	3	4	4	6	8	6	5	3	0	2	56
d__Bacteria	k__norank_d__Bacteria	p__Proteobacteria	c__Deltaproteobacteria	o__Oligoflexales	f__0319-6G20	g__norank_f__0319-6G20	s__unclassified_g__norank_f__0319-6G20	OTU2083	0	0	0	0	1	0	1	0	0	0	0	0	2
d__Bacteria	k__norank_d__Bacteria	p__Proteobacteria	c__Alphaproteobacteria	o__Rhizobiales	f__JG34-KF-361	g__norank_f__JG34-KF-361	s__unclassified_g__norank_f__JG34-KF-361	OTU1874	8	5	11	40	20	16	20	17	10	9	16	10	182
d__Bacteria	k__norank_d__Bacteria	p__Actinobacteria	c__Actinobacteria	o__Solirubrobacterales	f__Elev-16S-1332	g__norank_f__Elev-16S-1332	s__unclassified_g__norank_f__Elev-16S-1332	OTU989	3	2	2	7	4	3	25	11	5	37	8	8	115
d__Bacteria	k__norank_d__Bacteria	p__Gemmatimonadetes	c__Gemmatimonadetes	o__Gemmatimonadales	f__Gemmatimonadaceae	g__norank_f__Gemmatimonadaceae	s__unclassified_g__norank_f__Gemmatimonadaceae	OTU2759	90	66	49	62	33	38	94	38	61	3	4	10	548
d__Bacteria	k__norank_d__Bacteria	p__Planctomycetes	c__unclassified_p__Planctomycetes	o__unclassified_p__Planctomycetes	f__unclassified_p__Planctomycetes	g__unclassified_p__Planctomycetes	s__unclassified_p__Planctomycetes	OTU1588	3	1	2	0	1	0	3	1	1	0	0	0	12
d__Bacteria	k__norank_d__Bacteria	p__Actinobacteria	c__Actinobacteria	o__Pseudonocardiales	f__Pseudonocardiaceae	g__Pseudonocardia	s__unclassified_g__Pseudonocardia	OTU1431	32	21	14	69	46	51	65	47	40	154	52	65	656
d__Bacteria	k__norank_d__Bacteria	p__Actinobacteria	c__Actinobacteria	o__Acidimicrobiales	f__Acidimicrobiaceae	g__norank_f__Acidimicrobiaceae	s__unclassified_g__norank_f__Acidimicrobiaceae	OTU93	41	23	25	36	44	34	107	57	56	6	9	13	451
d__Bacteria	k__norank_d__Bacteria	p__Gemmatimonadetes	c__Gemmatimonadetes	o__Gemmatimonadales	f__Gemmatimonadaceae	g__Gemmatirosa	s__uncultured_bacterium_g__Gemmatirosa	OTU2122	2	0	1	0	0	0	2	1	2	2	0	0	10
d__Bacteria	k__norank_d__Bacteria	p__Proteobacteria	c__Betaproteobacteria	o__Burkholderiales	f__Alcaligenaceae	g__unclassified_f__Alcaligenaceae	s__unclassified_f__Alcaligenaceae	OTU456	2	45	1	33	76	60	0	0	0	0	2	4	223
d__Bacteria	k__norank_d__Bacteria	p__Chloroflexi	c__Anaerolineae	o__Anaerolineales	f__Anaerolineaceae	g__norank_f__Anaerolineaceae	s__unclassified_g__norank_f__Anaerolineaceae	OTU2443	1	4	2	7	3	1	28	3	1	0	1	0	51
d__Bacteria	k__norank_d__Bacteria	p__Chloroflexi	c__Chloroflexia	o__Kallotenuales	f__AKIW781	g__norank_f__AKIW781	s__unclassified_g__norank_f__AKIW781	OTU1377	1	0	0	1	1	2	0	2	0	2	0	1	10
d__Bacteria	k__norank_d__Bacteria	p__Firmicutes	c__Bacilli	o__Bacillales	f__Paenibacillaceae	g__Paenibacillus	s__unclassified_g__Paenibacillus	OTU451	1	2	3	0	0	0	2	1	2	0	0	0	11
d__Bacteria	k__norank_d__Bacteria	p__Proteobacteria	c__Deltaproteobacteria	o__Myxococcales	f__BIrii41	g__norank_f__BIrii41	s__uncultured_bacterium_g__norank_f__BIrii41	OTU2163	29	16	28	52	36	41	43	23	15	1	0	0	284
d__Bacteria	k__norank_d__Bacteria	p__Bacteroidetes	c__Sphingobacteriia	o__Sphingobacteriales	f__unclassified_o__Sphingobacteriales	g__unclassified_o__Sphingobacteriales	s__unclassified_o__Sphingobacteriales	OTU2000	0	0	0	0	0	1	2	0	0	0	0	0	3
d__Bacteria	k__norank_d__Bacteria	p__Bacteroidetes	c__Sphingobacteriia	o__Sphingobacteriales	f__Chitinophagaceae	g__Chitinophaga	s__unclassified_g__Chitinophaga	OTU541	0	1	0	0	0	1	0	0	0	4	2	1	9
d__Bacteria	k__norank_d__Bacteria	p__Proteobacteria	c__Gammaproteobacteria	o__unclassified_c__Gammaproteobacteria	f__unclassified_c__Gammaproteobacteria	g__unclassified_c__Gammaproteobacteria	s__unclassified_c__Gammaproteobacteria	OTU116	3	0	4	4	2	5	0	2	2	7	9	27	65
d__Bacteria	k__norank_d__Bacteria	p__unclassified_k__norank_d__Bacteria	c__unclassified_k__norank_d__Bacteria	o__unclassified_k__norank_d__Bacteria	f__unclassified_k__norank_d__Bacteria	g__unclassified_k__norank_d__Bacteria	s__unclassified_k__norank_d__Bacteria	OTU572	4	0	0	1	1	0	6	2	2	2	0	2	20
d__Bacteria	k__norank_d__Bacteria	p__Gemmatimonadetes	c__Gemmatimonadetes	o__Longimicrobiales	f__Longimicrobiaceae	g__norank_f__Longimicrobiaceae	s__unclassified_g__norank_f__Longimicrobiaceae	OTU1998	1	1	0	7	0	3	11	2	3	2	2	0	32
d__Bacteria	k__norank_d__Bacteria	p__Proteobacteria	c__Alphaproteobacteria	o__Caulobacterales	f__Caulobacteraceae	g__Brevundimonas	s__unclassified_g__Brevundimonas	OTU598	0	1	0	0	1	1	0	1	0	13	13	23	53
d__Bacteria	k__norank_d__Bacteria	p__Chloroflexi	c__Thermomicrobia	o__AKYG1722	f__norank_o__AKYG1722	g__norank_o__AKYG1722	s__unclassified_g__norank_o__AKYG1722	OTU3075	3	0	0	4	2	12	0	0	0	4	0	6	31
d__Bacteria	k__norank_d__Bacteria	p__Planctomycetes	c__Planctomycetacia	o__Planctomycetales	f__Planctomycetaceae	g__norank_f__Planctomycetaceae	s__uncultured_bacterium_g__norank_f__Planctomycetaceae	OTU1625	2	2	2	1	0	0	3	1	0	2	0	1	14
d__Bacteria	k__norank_d__Bacteria	p__Chloroflexi	c__Anaerolineae	o__Anaerolineales	f__Anaerolineaceae	g__norank_f__Anaerolineaceae	s__unclassified_g__norank_f__Anaerolineaceae	OTU1922	0	0	0	2	2	0	2	1	0	0	0	0	7
d__Bacteria	k__norank_d__Bacteria	p__Proteobacteria	c__Deltaproteobacteria	o__Myxococcales	f__Polyangiaceae	g__unclassified_f__Polyangiaceae	s__unclassified_f__Polyangiaceae	OTU2559	5	2	0	3	2	1	9	5	3	0	0	0	30
d__Bacteria	k__norank_d__Bacteria	p__Proteobacteria	c__Betaproteobacteria	o__Burkholderiales	f__Burkholderiaceae	g__Cupriavidus	s__unclassified_g__Cupriavidus	OTU686	1	0	0	0	2	11	0	1	1	6	0	6	28
d__Bacteria	k__norank_d__Bacteria	p__Proteobacteria	c__Deltaproteobacteria	o__Myxococcales	f__Haliangiaceae	g__Haliangium	s__unclassified_g__Haliangium	OTU1088	0	2	0	2	3	3	13	8	2	0	0	1	34
d__Bacteria	k__norank_d__Bacteria	p__Actinobacteria	c__Actinobacteria	o__Frankiales	f__Nakamurellaceae	g__Nakamurella	s__uncultured_organism_g__Nakamurella	OTU930	5	1	1	4	1	3	7	3	1	27	13	21	87
d__Bacteria	k__norank_d__Bacteria	p__Chloroflexi	c__Anaerolineae	o__Anaerolineales	f__Anaerolineaceae	g__norank_f__Anaerolineaceae	s__unclassified_g__norank_f__Anaerolineaceae	OTU2593	4	1	1	9	1	0	13	3	3	1	0	0	36
d__Bacteria	k__norank_d__Bacteria	p__Planctomycetes	c__Planctomycetacia	o__Planctomycetales	f__Planctomycetaceae	g__norank_f__Planctomycetaceae	s__unclassified_g__norank_f__Planctomycetaceae	OTU2555	8	6	6	11	4	1	5	2	3	0	0	0	46
d__Bacteria	k__norank_d__Bacteria	p__Chloroflexi	c__Anaerolineae	o__Anaerolineales	f__Anaerolineaceae	g__norank_f__Anaerolineaceae	s__unclassified_g__norank_f__Anaerolineaceae	OTU2596	1	2	1	0	0	0	4	0	0	0	0	0	8
d__Bacteria	k__norank_d__Bacteria	p__Nitrospirae	c__Nitrospira	o__norank_c__Nitrospira	f__norank_c__Nitrospira	g__Nitrospira	s__unclassified_g__Nitrospira	OTU2417	10	12	19	6	7	5	28	12	38	0	0	0	137
d__Bacteria	k__norank_d__Bacteria	p__Planctomycetes	c__Planctomycetacia	o__Planctomycetales	f__Planctomycetaceae	g__Pir4_lineage	s__unclassified_g__Pir4_lineage	OTU2965	2	3	1	3	1	0	0	1	1	2	0	3	17
d__Bacteria	k__norank_d__Bacteria	p__Tectomicrobia	c__norank_p__Tectomicrobia	o__norank_p__Tectomicrobia	f__norank_p__Tectomicrobia	g__norank_p__Tectomicrobia	s__uncultured_bacterium_g__norank_p__Tectomicrobia	OTU2638	31	16	8	10	21	9	54	33	20	6	2	4	214
d__Bacteria	k__norank_d__Bacteria	p__Planctomycetes	c__Planctomycetacia	o__Planctomycetales	f__Planctomycetaceae	g__unclassified_f__Planctomycetaceae	s__unclassified_f__Planctomycetaceae	OTU817	1	1	0	0	1	0	1	0	0	9	3	2	18
d__Bacteria	k__norank_d__Bacteria	p__Proteobacteria	c__Alphaproteobacteria	o__Rhodospirillales	f__MSB-1E8	g__norank_f__MSB-1E8	s__uncultured_bacterium_g__norank_f__MSB-1E8	OTU1483	28	10	3	17	13	25	46	14	19	0	0	2	177
d__Bacteria	k__norank_d__Bacteria	p__Bacteroidetes	c__Sphingobacteriia	o__Sphingobacteriales	f__Chitinophagaceae	g__Flavisolibacter	s__unclassified_g__Flavisolibacter	OTU2431	10	2	4	3	8	4	12	10	5	0	1	1	60
d__Bacteria	k__norank_d__Bacteria	p__Proteobacteria	c__Alphaproteobacteria	o__Rhizobiales	f__Rhizobiales_Incertae_Sedis	g__Rhizomicrobium	s__unclassified_g__Rhizomicrobium	OTU568	0	0	0	1	0	0	0	0	0	4	4	2	11
d__Bacteria	k__norank_d__Bacteria	p__Actinobacteria	c__Actinobacteria	o__Propionibacteriales	f__Nocardioidaceae	g__Nocardioides	s__unclassified_g__Nocardioides	OTU542	0	0	0	0	0	0	0	0	0	26	3	6	35
d__Bacteria	k__norank_d__Bacteria	p__Actinobacteria	c__Actinobacteria	o__Gaiellales	f__norank_o__Gaiellales	g__norank_o__Gaiellales	s__unclassified_g__norank_o__Gaiellales	OTU2446	29	4	9	2	4	3	40	20	40	5	1	3	160
d__Bacteria	k__norank_d__Bacteria	p__Actinobacteria	c__Actinobacteria	o__Gaiellales	f__norank_o__Gaiellales	g__norank_o__Gaiellales	s__unclassified_g__norank_o__Gaiellales	OTU2445	26	15	4	15	20	37	71	54	50	21	2	13	328
d__Bacteria	k__norank_d__Bacteria	p__Proteobacteria	c__Deltaproteobacteria	o__Myxococcales	f__unclassified_o__Myxococcales	g__unclassified_o__Myxococcales	s__unclassified_o__Myxococcales	OTU2700	2	1	0	2	1	0	19	2	3	0	0	0	30
d__Bacteria	k__norank_d__Bacteria	p__Acidobacteria	c__Acidobacteria	o__Subgroup_7	f__norank_o__Subgroup_7	g__norank_o__Subgroup_7	s__unclassified_g__norank_o__Subgroup_7	OTU399	2	1	0	0	0	0	1	0	0	0	0	0	4
d__Bacteria	k__norank_d__Bacteria	p__Gemmatimonadetes	c__Gemmatimonadetes	o__Gemmatimonadales	f__Gemmatimonadaceae	g__Gemmatimonas	s__uncultured_bacterium_g__Gemmatimonas	OTU369	0	6	5	0	1	1	2	2	1	1	0	0	19
d__Bacteria	k__norank_d__Bacteria	p__Firmicutes	c__Bacilli	o__Bacillales	f__Paenibacillaceae	g__unclassified_f__Paenibacillaceae	s__unclassified_f__Paenibacillaceae	OTU3207	1	0	0	3	1	2	0	1	0	0	0	0	8
d__Bacteria	k__norank_d__Bacteria	p__Actinobacteria	c__Actinobacteria	o__Corynebacteriales	f__Nocardiaceae	g__Rhodococcus	s__Rhodococcus_fascians	OTU863	2	3	4	0	0	2	0	0	0	5	11	23	50
d__Bacteria	k__norank_d__Bacteria	p__Chloroflexi	c__Anaerolineae	o__Anaerolineales	f__Anaerolineaceae	g__norank_f__Anaerolineaceae	s__uncultured_Caldilineaceae_bacterium_g__norank_f__Anaerolineaceae	OTU422	5	5	0	1	3	1	3	0	3	0	0	0	21
d__Bacteria	k__norank_d__Bacteria	p__Planctomycetes	c__Planctomycetacia	o__Planctomycetales	f__Planctomycetaceae	g__norank_f__Planctomycetaceae	s__uncultured_bacterium_g__norank_f__Planctomycetaceae	OTU281	8	3	6	1	3	0	8	10	3	0	1	0	43
d__Bacteria	k__norank_d__Bacteria	p__Acidobacteria	c__Acidobacteria	o__Blastocatellales	f__Blastocatellaceae__Subgroup_4_	g__RB41	s__uncultured_organism_g__RB41	OTU78	6	2	3	1	0	0	1	1	0	7	3	0	24
d__Bacteria	k__norank_d__Bacteria	p__unclassified_k__norank_d__Bacteria	c__unclassified_k__norank_d__Bacteria	o__unclassified_k__norank_d__Bacteria	f__unclassified_k__norank_d__Bacteria	g__unclassified_k__norank_d__Bacteria	s__unclassified_k__norank_d__Bacteria	OTU1452	1	0	1	2	5	1	8	11	4	1	0	0	34
d__Bacteria	k__norank_d__Bacteria	p__Planctomycetes	c__Planctomycetacia	o__Planctomycetales	f__Planctomycetaceae	g__Pir4_lineage	s__uncultured_Planctomycetaceae_bacterium_g__Pir4_lineage	OTU2557	134	83	42	53	76	11	56	79	48	74	17	9	682
d__Bacteria	k__norank_d__Bacteria	p__Bacteroidetes	c__Bacteroidetes_Incertae_Sedis	o__Order_II	f__Rhodothermaceae	g__norank_f__Rhodothermaceae	s__unclassified_g__norank_f__Rhodothermaceae	OTU1798	7	2	3	9	15	11	13	6	5	7	1	1	80
d__Bacteria	k__norank_d__Bacteria	p__unclassified_k__norank_d__Bacteria	c__unclassified_k__norank_d__Bacteria	o__unclassified_k__norank_d__Bacteria	f__unclassified_k__norank_d__Bacteria	g__unclassified_k__norank_d__Bacteria	s__unclassified_k__norank_d__Bacteria	OTU1457	0	0	0	0	0	0	0	2	1	2	0	1	6
d__Bacteria	k__norank_d__Bacteria	p__Actinobacteria	c__Actinobacteria	o__norank_c__Actinobacteria	f__norank_c__Actinobacteria	g__norank_c__Actinobacteria	s__uncultured_Actinomycetales_bacterium_g__norank_c__Actinobacteria	OTU2277	14	4	3	16	18	0	22	6	9	4	1	1	98
d__Bacteria	k__norank_d__Bacteria	p__Bacteroidetes	c__Sphingobacteriia	o__Sphingobacteriales	f__Chitinophagaceae	g__norank_f__Chitinophagaceae	s__unclassified_g__norank_f__Chitinophagaceae	OTU2190	9	29	6	1	8	5	25	9	4	0	1	0	97
d__Bacteria	k__norank_d__Bacteria	p__Planctomycetes	c__Phycisphaerae	o__Tepidisphaerales	f__Tepidisphaeraceae	g__norank_f__Tepidisphaeraceae	s__uncultured_bacterium_g__norank_f__Tepidisphaeraceae	OTU2174	34	39	10	87	27	2	25	19	9	2	0	0	254
d__Bacteria	k__norank_d__Bacteria	p__Actinobacteria	c__Actinobacteria	o__Acidimicrobiales	f__OM1_clade	g__norank_f__OM1_clade	s__uncultured_compost_bacterium_g__norank_f__OM1_clade	OTU2893	1	3	1	11	7	33	1	3	3	8	3	7	81
d__Bacteria	k__norank_d__Bacteria	p__Proteobacteria	c__Alphaproteobacteria	o__Rhodospirillales	f__Rhodospirillales_Incertae_Sedis	g__Geminicoccus	s__unclassified_g__Geminicoccus	OTU1854	5	6	3	3	4	6	6	3	10	52	29	21	148
d__Bacteria	k__norank_d__Bacteria	p__Actinobacteria	c__Actinobacteria	o__norank_c__Actinobacteria	f__norank_c__Actinobacteria	g__norank_c__Actinobacteria	s__unclassified_g__norank_c__Actinobacteria	OTU705	2	0	0	0	0	0	1	4	2	21	5	12	47
d__Bacteria	k__norank_d__Bacteria	p__Firmicutes	c__Limnochordia	o__Limnochordales	f__Limnochordaceae	g__Limnochorda	s__unclassified_g__Limnochorda	OTU1450	0	0	0	0	0	0	0	2	0	0	0	0	2
d__Bacteria	k__norank_d__Bacteria	p__Proteobacteria	c__Alphaproteobacteria	o__Rhizobiales	f__Rhodobiaceae	g__norank_f__Rhodobiaceae	s__uncultured_Rhizobiales_bacterium_g__norank_f__Rhodobiaceae	OTU2263	108	62	68	148	114	125	160	90	85	48	29	32	1069
d__Bacteria	k__norank_d__Bacteria	p__Planctomycetes	c__Planctomycetacia	o__Planctomycetales	f__Planctomycetaceae	g__Gemmata	s__unclassified_g__Gemmata	OTU1554	2	1	1	5	1	0	5	1	1	2	0	1	20
d__Bacteria	k__norank_d__Bacteria	p__Chloroflexi	c__Thermomicrobia	o__JG30-KF-CM45	f__norank_o__JG30-KF-CM45	g__norank_o__JG30-KF-CM45	s__uncultured_Chloroflexi_bacterium_g__norank_o__JG30-KF-CM45	OTU2305	31	26	5	15	11	29	23	38	35	13	3	2	231
d__Bacteria	k__norank_d__Bacteria	p__Verrucomicrobia	c__OPB35_soil_group	o__norank_c__OPB35_soil_group	f__norank_c__OPB35_soil_group	g__norank_c__OPB35_soil_group	s__unclassified_g__norank_c__OPB35_soil_group	OTU2506	32	2	4	3	10	0	27	11	2	1	1	1	94
d__Bacteria	k__norank_d__Bacteria	p__Firmicutes	c__Clostridia	o__Clostridiales	f__Clostridiaceae_3	g__Brassicibacter	s__Brassicibacter_mesophilus	OTU1473	0	0	0	1	0	0	1	1	0	0	0	0	3
d__Bacteria	k__norank_d__Bacteria	p__Proteobacteria	c__Deltaproteobacteria	o__Myxococcales	f__Sandaracinaceae	g__norank_f__Sandaracinaceae	s__unclassified_g__norank_f__Sandaracinaceae	OTU702	0	0	0	0	0	1	0	0	0	6	5	25	37
d__Bacteria	k__norank_d__Bacteria	p__Actinobacteria	c__Actinobacteria	o__Acidimicrobiales	f__OM1_clade	g__norank_f__OM1_clade	s__unclassified_g__norank_f__OM1_clade	OTU823	0	0	0	0	0	1	0	0	0	7	2	4	14
d__Bacteria	k__norank_d__Bacteria	p__Proteobacteria	c__Deltaproteobacteria	o__Myxococcales	f__Polyangiaceae	g__Polyangium	s__unclassified_g__Polyangium	OTU954	1	0	1	1	4	3	11	2	3	0	0	0	26
d__Bacteria	k__norank_d__Bacteria	p__Bacteroidetes	c__Sphingobacteriia	o__Sphingobacteriales	f__Chitinophagaceae	g__unclassified_f__Chitinophagaceae	s__unclassified_f__Chitinophagaceae	OTU1239	2	0	0	0	1	1	5	1	1	1	0	0	12
d__Bacteria	k__norank_d__Bacteria	p__Proteobacteria	c__Alphaproteobacteria	o__Rhizobiales	f__Hyphomicrobiaceae	g__Hyphomicrobium	s__unclassified_g__Hyphomicrobium	OTU1309	49	32	47	67	43	64	63	53	48	38	20	31	555
d__Bacteria	k__norank_d__Bacteria	p__Proteobacteria	c__Alphaproteobacteria	o__Rhizobiales	f__Xanthobacteraceae	g__Pseudolabrys	s__uncultured_bacterium_g__Pseudolabrys	OTU856	0	0	0	0	0	1	0	0	0	1	2	14	18
d__Bacteria	k__norank_d__Bacteria	p__Actinobacteria	c__Actinobacteria	o__Micrococcales	f__Intrasporangiaceae	g__Phycicoccus	s__unclassified_g__Phycicoccus	OTU1120	13	10	17	21	13	7	27	25	42	24	10	8	217
d__Bacteria	k__norank_d__Bacteria	p__Proteobacteria	c__Deltaproteobacteria	o__Myxococcales	f__P3OB-42	g__norank_f__P3OB-42	s__unclassified_g__norank_f__P3OB-42	OTU1863	4	0	4	4	3	2	9	5	6	2	1	1	41
d__Bacteria	k__norank_d__Bacteria	p__Planctomycetes	c__Planctomycetacia	o__Planctomycetales	f__Planctomycetaceae	g__norank_f__Planctomycetaceae	s__unclassified_g__norank_f__Planctomycetaceae	OTU2999	1	2	2	2	3	0	1	2	0	0	1	2	16
d__Bacteria	k__norank_d__Bacteria	p__Chlamydiae	c__Chlamydiae	o__Chlamydiales	f__Parachlamydiaceae	g__unclassified_f__Parachlamydiaceae	s__unclassified_f__Parachlamydiaceae	OTU1593	0	0	0	0	0	0	2	0	0	0	0	0	2
d__Bacteria	k__norank_d__Bacteria	p__Chloroflexi	c__unclassified_p__Chloroflexi	o__unclassified_p__Chloroflexi	f__unclassified_p__Chloroflexi	g__unclassified_p__Chloroflexi	s__unclassified_p__Chloroflexi	OTU614	0	0	0	0	0	0	0	0	0	2	0	0	2
d__Bacteria	k__norank_d__Bacteria	p__Actinobacteria	c__Actinobacteria	o__Micrococcales	f__Cellulomonadaceae	g__Cellulomonas	s__unclassified_g__Cellulomonas	OTU2437	21	12	19	88	49	21	28	17	48	332	184	156	975
d__Bacteria	k__norank_d__Bacteria	p__Actinobacteria	c__Actinobacteria	o__Kineosporiales	f__Kineosporiaceae	g__Angustibacter	s__uncultured_bacterium_g__Angustibacter	OTU3058	0	12	0	5	3	1	2	2	5	2	0	0	32
d__Bacteria	k__norank_d__Bacteria	p__Proteobacteria	c__Alphaproteobacteria	o__Rhizobiales	f__Hyphomicrobiaceae	g__Devosia	s__Devosia_submarina	OTU801	0	1	0	0	1	0	0	0	0	19	15	23	59
d__Bacteria	k__norank_d__Bacteria	p__Proteobacteria	c__Deltaproteobacteria	o__Myxococcales	f__Nannocystaceae	g__Nannocystis	s__uncultured_bacterium_g__Nannocystis	OTU1001	3	3	1	1	8	2	0	3	3	0	4	3	31
d__Bacteria	k__norank_d__Bacteria	p__Proteobacteria	c__Alphaproteobacteria	o__Rhodospirillales	f__Rhodospirillaceae	g__Ferrovibrio	s__unclassified_g__Ferrovibrio	OTU715	0	0	0	0	0	0	0	0	0	0	4	7	11
d__Bacteria	k__norank_d__Bacteria	p__Proteobacteria	c__Alphaproteobacteria	o__Rhodospirillales	f__unclassified_o__Rhodospirillales	g__unclassified_o__Rhodospirillales	s__unclassified_o__Rhodospirillales	OTU2142	1	3	3	6	1	3	5	0	3	16	3	8	52
d__Bacteria	k__norank_d__Bacteria	p__Proteobacteria	c__Betaproteobacteria	o__Nitrosomonadales	f__Gallionellaceae	g__Candidatus_Nitrotoga	s__unclassified_g__Candidatus_Nitrotoga	OTU2884	2	1	2	0	0	9	0	0	0	0	0	0	14
d__Bacteria	k__norank_d__Bacteria	p__Actinobacteria	c__Actinobacteria	o__Acidimicrobiales	f__norank_o__Acidimicrobiales	g__norank_o__Acidimicrobiales	s__unclassified_g__norank_o__Acidimicrobiales	OTU1059	2	1	0	4	8	12	5	6	3	21	4	6	72
d__Bacteria	k__norank_d__Bacteria	p__Actinobacteria	c__Actinobacteria	o__Frankiales	f__Sporichthyaceae	g__Sporichthya	s__unclassified_g__Sporichthya	OTU562	0	1	1	0	3	0	0	0	1	3	0	2	11
d__Bacteria	k__norank_d__Bacteria	p__Proteobacteria	c__Betaproteobacteria	o__Nitrosomonadales	f__Nitrosomonadaceae	g__Nitrosomonas	s__Nitrosomonas_communis	OTU20	3	13	9	4	4	12	1	1	2	0	0	0	49
d__Bacteria	k__norank_d__Bacteria	p__Chloroflexi	c__TK10	o__norank_c__TK10	f__norank_c__TK10	g__norank_c__TK10	s__Chloroflexi_bacterium_OLB14	OTU2220	15	27	11	23	16	10	14	12	3	6	6	7	150
d__Bacteria	k__norank_d__Bacteria	p__Actinobacteria	c__Actinobacteria	o__Solirubrobacterales	f__unclassified_o__Solirubrobacterales	g__unclassified_o__Solirubrobacterales	s__unclassified_o__Solirubrobacterales	OTU1656	1	0	0	1	0	0	2	1	0	12	2	0	19
d__Bacteria	k__norank_d__Bacteria	p__Proteobacteria	c__Deltaproteobacteria	o__Myxococcales	f__Polyangiaceae	g__Sorangium	s__uncultured_soil_bacterium_g__Sorangium	OTU1321	1	1	2	2	1	0	4	2	2	0	0	0	15
d__Bacteria	k__norank_d__Bacteria	p__Bacteroidetes	c__Sphingobacteriia	o__Sphingobacteriales	f__Chitinophagaceae	g__Parafilimonas	s__uncultured_Bacteroidetes_bacterium_g__Parafilimonas	OTU3077	1	5	2	16	11	10	0	0	0	0	0	0	45
d__Bacteria	k__norank_d__Bacteria	p__Chloroflexi	c__Thermomicrobia	o__JG30-KF-CM45	f__norank_o__JG30-KF-CM45	g__norank_o__JG30-KF-CM45	s__uncultured_bacterium_g__norank_o__JG30-KF-CM45	OTU828	9	64	6	45	24	55	5	10	4	8	7	3	240
d__Bacteria	k__norank_d__Bacteria	p__Bacteroidetes	c__Sphingobacteriia	o__Sphingobacteriales	f__Chitinophagaceae	g__Flavisolibacter	s__Flavisolibacter_ginsengisoli_g__Flavisolibacter	OTU1674	9	4	9	15	20	7	32	6	10	7	0	1	120
d__Bacteria	k__norank_d__Bacteria	p__Actinobacteria	c__Actinobacteria	o__Gaiellales	f__norank_o__Gaiellales	g__norank_o__Gaiellales	s__unclassified_g__norank_o__Gaiellales	OTU1402	3	1	3	6	6	4	2	1	5	5	4	5	45
d__Bacteria	k__norank_d__Bacteria	p__Planctomycetes	c__Planctomycetacia	o__Planctomycetales	f__Planctomycetaceae	g__norank_f__Planctomycetaceae	s__unclassified_g__norank_f__Planctomycetaceae	OTU1220	2	0	0	2	1	0	1	1	2	0	0	0	9
d__Bacteria	k__norank_d__Bacteria	p__Gemmatimonadetes	c__Gemmatimonadetes	o__Gemmatimonadales	f__Gemmatimonadaceae	g__Gemmatimonas	s__unclassified_g__Gemmatimonas	OTU3072	0	0	1	7	8	3	1	0	0	1	0	1	22
d__Bacteria	k__norank_d__Bacteria	p__Planctomycetes	c__Planctomycetacia	o__Planctomycetales	f__Planctomycetaceae	g__norank_f__Planctomycetaceae	s__unclassified_g__norank_f__Planctomycetaceae	OTU1730	13	7	4	7	3	1	7	7	7	3	0	0	59
d__Bacteria	k__norank_d__Bacteria	p__Planctomycetes	c__Planctomycetacia	o__Planctomycetales	f__Planctomycetaceae	g__norank_f__Planctomycetaceae	s__unclassified_g__norank_f__Planctomycetaceae	OTU1223	1	4	0	2	2	0	3	3	2	0	0	0	17
d__Bacteria	k__norank_d__Bacteria	p__Proteobacteria	c__Alphaproteobacteria	o__Rhodospirillales	f__Acetobacteraceae	g__Craurococcus	s__unclassified_g__Craurococcus	OTU1022	1	0	4	2	5	1	6	3	4	1	0	1	28
d__Bacteria	k__norank_d__Bacteria	p__Actinobacteria	c__Actinobacteria	o__Pseudonocardiales	f__Pseudonocardiaceae	g__Lentzea	s__unclassified_g__Lentzea	OTU1024	155	121	212	211	154	136	360	211	123	152	57	66	1958
d__Bacteria	k__norank_d__Bacteria	p__Actinobacteria	c__Actinobacteria	o__Propionibacteriales	f__Nocardioidaceae	g__unclassified_f__Nocardioidaceae	s__unclassified_f__Nocardioidaceae	OTU1006	9	6	6	11	3	4	8	12	12	109	41	33	254
d__Bacteria	k__norank_d__Bacteria	p__Proteobacteria	c__Gammaproteobacteria	o__Legionellales	f__Coxiellaceae	g__Aquicella	s__unclassified_g__Aquicella	OTU1683	0	0	0	0	0	0	4	0	0	0	0	0	4
d__Bacteria	k__norank_d__Bacteria	p__Elusimicrobia	c__Elusimicrobia	o__Lineage_IIa	f__norank_o__Lineage_IIa	g__norank_o__Lineage_IIa	s__unclassified_g__norank_o__Lineage_IIa	OTU2108	11	0	3	2	1	0	5	0	1	0	0	0	23
d__Bacteria	k__norank_d__Bacteria	p__Proteobacteria	c__Betaproteobacteria	o__Methylophilales	f__Methylophilaceae	g__Methylotenera	s__uncultured_Methylophilaceae_bacterium_g__Methylotenera	OTU523	0	1	0	0	0	0	0	0	0	8	0	0	9
d__Bacteria	k__norank_d__Bacteria	p__Cyanobacteria	c__Cyanobacteria	o__SubsectionIII	f__FamilyI_o__SubsectionIII	g__Phormidium	s__unclassified_g__Phormidium	OTU1062	1	0	2	0	1	0	1	1	1	0	0	0	7
d__Bacteria	k__norank_d__Bacteria	p__Chlorobi	c__Chlorobia	o__Chlorobiales	f__OPB56	g__norank_f__OPB56	s__unclassified_g__norank_f__OPB56	OTU3124	0	1	1	4	2	1	3	0	0	1	0	2	15
d__Bacteria	k__norank_d__Bacteria	p__Chloroflexi	c__KD4-96	o__norank_c__KD4-96	f__norank_c__KD4-96	g__norank_c__KD4-96	s__unclassified_g__norank_c__KD4-96	OTU663	6	1	1	5	3	0	3	2	1	22	4	7	55
d__Bacteria	k__norank_d__Bacteria	p__Acidobacteria	c__Acidobacteria	o__Blastocatellales	f__Blastocatellaceae__Subgroup_4_	g__unclassified_f__Blastocatellaceae__Subgroup_4_	s__unclassified_f__Blastocatellaceae__Subgroup_4_	OTU1097	1	0	3	6	1	1	1	3	1	0	0	0	17
d__Bacteria	k__norank_d__Bacteria	p__Actinobacteria	c__Actinobacteria	o__Gaiellales	f__Gaiellaceae	g__Gaiella	s__unclassified_g__Gaiella	OTU797	58	27	27	51	42	55	126	74	99	62	19	40	680
d__Bacteria	k__norank_d__Bacteria	p__Chloroflexi	c__Ardenticatenia	o__norank_c__Ardenticatenia	f__norank_c__Ardenticatenia	g__norank_c__Ardenticatenia	s__unclassified_g__norank_c__Ardenticatenia	OTU353	0	2	1	4	0	0	2	1	0	0	0	0	10
d__Bacteria	k__norank_d__Bacteria	p__Proteobacteria	c__Deltaproteobacteria	o__Desulfurellales	f__Desulfurellaceae	g__H16	s__unclassified_g__H16	OTU3277	1	1	1	3	3	2	0	1	0	0	0	0	12
d__Bacteria	k__norank_d__Bacteria	p__Proteobacteria	c__Alphaproteobacteria	o__Rhodospirillales	f__Rhodospirillaceae	g__Tagaea	s__uncultured_alpha_proteobacterium_g__Tagaea	OTU1165	2	3	3	6	2	10	2	2	2	4	0	2	38
d__Bacteria	k__norank_d__Bacteria	p__Chloroflexi	c__Thermomicrobia	o__JG30-KF-CM45	f__norank_o__JG30-KF-CM45	g__norank_o__JG30-KF-CM45	s__uncultured_bacterium_g__norank_o__JG30-KF-CM45	OTU918	1	1	2	1	0	1	0	0	1	52	20	27	106
d__Bacteria	k__norank_d__Bacteria	p__Chloroflexi	c__Anaerolineae	o__Anaerolineales	f__Anaerolineaceae	g__norank_f__Anaerolineaceae	s__unclassified_g__norank_f__Anaerolineaceae	OTU1768	4	5	2	3	10	0	8	2	1	5	1	1	42
d__Bacteria	k__norank_d__Bacteria	p__Proteobacteria	c__Deltaproteobacteria	o__Myxococcales	f__Sandaracinaceae	g__unclassified_f__Sandaracinaceae	s__unclassified_f__Sandaracinaceae	OTU3163	1	0	0	2	4	0	0	0	0	0	0	0	7
d__Bacteria	k__norank_d__Bacteria	p__Chloroflexi	c__Chloroflexia	o__Kallotenuales	f__AKIW781	g__norank_f__AKIW781	s__unclassified_g__norank_f__AKIW781	OTU392	2	6	0	2	6	1	0	2	2	2	0	0	23
d__Bacteria	k__norank_d__Bacteria	p__Proteobacteria	c__Alphaproteobacteria	o__Rhodospirillales	f__Rhodospirillales_Incertae_Sedis	g__Candidatus_Alysiosphaera	s__unclassified_g__Candidatus_Alysiosphaera	OTU1454	11	9	7	12	11	5	18	15	11	6	3	2	110
d__Bacteria	k__norank_d__Bacteria	p__Proteobacteria	c__Gammaproteobacteria	o__Xanthomonadales	f__norank_o__Xanthomonadales	g__norank_o__Xanthomonadales	s__uncultured_soil_bacterium_g__norank_o__Xanthomonadales	OTU757	0	0	0	1	3	2	0	0	1	3	3	3	16
d__Bacteria	k__norank_d__Bacteria	p__Actinobacteria	c__Actinobacteria	o__Micromonosporales	f__Micromonosporaceae	g__unclassified_f__Micromonosporaceae	s__unclassified_f__Micromonosporaceae	OTU2910	182	161	92	435	243	330	351	184	169	514	205	204	3070
d__Bacteria	k__norank_d__Bacteria	p__Actinobacteria	c__Actinobacteria	o__Kineosporiales	f__Kineosporiaceae	g__unclassified_f__Kineosporiaceae	s__unclassified_f__Kineosporiaceae	OTU780	1	3	1	2	2	0	3	0	0	5	8	9	34
d__Bacteria	k__norank_d__Bacteria	p__Chloroflexi	c__Anaerolineae	o__Anaerolineales	f__Anaerolineaceae	g__norank_f__Anaerolineaceae	s__unclassified_g__norank_f__Anaerolineaceae	OTU1560	0	0	0	0	0	0	8	0	0	0	0	0	8
d__Bacteria	k__norank_d__Bacteria	p__Planctomycetes	c__Planctomycetacia	o__Planctomycetales	f__Planctomycetaceae	g__unclassified_f__Planctomycetaceae	s__unclassified_f__Planctomycetaceae	OTU678	5	2	3	5	1	0	3	4	3	2	0	0	28
d__Bacteria	k__norank_d__Bacteria	p__Proteobacteria	c__Alphaproteobacteria	o__Sphingomonadales	f__Sphingomonadaceae	g__Sphingomonas	s__unclassified_g__Sphingomonas	OTU2120	135	73	81	48	83	58	251	110	91	23	9	15	977
d__Bacteria	k__norank_d__Bacteria	p__Chloroflexi	c__TK10	o__norank_c__TK10	f__norank_c__TK10	g__norank_c__TK10	s__unclassified_g__norank_c__TK10	OTU2851	19	17	11	2	6	0	22	10	5	0	0	0	92
d__Bacteria	k__norank_d__Bacteria	p__Proteobacteria	c__Alphaproteobacteria	o__Rhizobiales	f__Hyphomicrobiaceae	g__Devosia	s__unclassified_g__Devosia	OTU774	59	64	48	70	57	83	94	60	32	234	236	168	1205
d__Bacteria	k__norank_d__Bacteria	p__Chloroflexi	c__Chloroflexia	o__Kallotenuales	f__AKIW781	g__norank_f__AKIW781	s__unclassified_g__norank_f__AKIW781	OTU1784	12	4	4	12	6	3	31	22	11	1	2	2	110
d__Bacteria	k__norank_d__Bacteria	p__Proteobacteria	c__Deltaproteobacteria	o__Myxococcales	f__Blfdi19	g__norank_f__Blfdi19	s__unclassified_g__norank_f__Blfdi19	OTU1285	0	0	0	0	0	1	1	5	1	0	0	0	8
d__Bacteria	k__norank_d__Bacteria	p__Proteobacteria	c__Alphaproteobacteria	o__Rhodobacterales	f__Rhodobacteraceae	g__Rubellimicrobium	s__unclassified_g__Rubellimicrobium	OTU2352	42	32	40	72	49	53	80	46	52	116	53	50	685
d__Bacteria	k__norank_d__Bacteria	p__Planctomycetes	c__Planctomycetacia	o__Planctomycetales	f__Planctomycetaceae	g__norank_f__Planctomycetaceae	s__uncultured_Singulisphaera_sp._g__norank	OTU390	0	2	0	7	2	0	0	0	0	2	0	1	14
d__Bacteria	k__norank_d__Bacteria	p__Bacteroidetes	c__Sphingobacteriia	o__Sphingobacteriales	f__Chitinophagaceae	g__Flavisolibacter	s__unclassified_g__Flavisolibacter	OTU2327	16	15	22	20	26	12	43	18	9	11	2	4	198
d__Bacteria	k__norank_d__Bacteria	p__Verrucomicrobia	c__Spartobacteria	o__Chthoniobacterales	f__Chthoniobacteraceae	g__Chthoniobacter	s__uncultured_Verrucomicrobia_bacterium_g__Chthoniobacter	OTU2401	15	5	5	25	6	1	14	8	5	1	0	0	85
d__Bacteria	k__norank_d__Bacteria	p__Actinobacteria	c__Actinobacteria	o__Gaiellales	f__norank_o__Gaiellales	g__norank_o__Gaiellales	s__uncultured_microorganism_g__norank_o__Gaiellales	OTU206	13	8	8	4	14	3	17	9	11	9	2	10	108
d__Bacteria	k__norank_d__Bacteria	p__Actinobacteria	c__Actinobacteria	o__Acidimicrobiales	f__norank_o__Acidimicrobiales	g__norank_o__Acidimicrobiales	s__unclassified_g__norank_o__Acidimicrobiales	OTU1485	24	14	18	38	12	20	45	15	32	6	2	3	229
d__Bacteria	k__norank_d__Bacteria	p__Actinobacteria	c__Actinobacteria	o__Propionibacteriales	f__Nocardioidaceae	g__Nocardioides	s__uncultured_organism_g__Nocardioides	OTU920	0	0	1	1	1	0	3	1	1	11	8	10	37
d__Bacteria	k__norank_d__Bacteria	p__Bacteroidetes	c__Sphingobacteriia	o__Sphingobacteriales	f__Chitinophagaceae	g__Flavisolibacter	s__unclassified_g__Flavisolibacter	OTU2899	0	0	0	2	0	4	1	1	1	1	0	0	10
d__Bacteria	k__norank_d__Bacteria	p__Planctomycetes	c__Planctomycetacia	o__Planctomycetales	f__Planctomycetaceae	g__Gemmata	s__unclassified_g__Gemmata	OTU1639	1	0	0	5	0	0	3	2	0	0	0	0	11
d__Bacteria	k__norank_d__Bacteria	p__Acidobacteria	c__Acidobacteria	o__norank_c__Acidobacteria	f__norank_c__Acidobacteria	g__norank_c__Acidobacteria	s__uncultured_Saccharibacillus_sp.	OTU1191	23	24	23	51	9	0	17	17	16	9	7	4	200
d__Bacteria	k__norank_d__Bacteria	p__unclassified_k__norank_d__Bacteria	c__unclassified_k__norank_d__Bacteria	o__unclassified_k__norank_d__Bacteria	f__unclassified_k__norank_d__Bacteria	g__unclassified_k__norank_d__Bacteria	s__unclassified_k__norank_d__Bacteria	OTU2355	8	1	3	1	1	0	5	2	1	0	0	1	23
d__Bacteria	k__norank_d__Bacteria	p__Proteobacteria	c__Alphaproteobacteria	o__Rhodobacterales	f__Rhodobacteraceae	g__unclassified_f__Rhodobacteraceae	s__unclassified_f__Rhodobacteraceae	OTU1343	0	1	0	1	0	0	5	1	0	0	0	0	8
d__Bacteria	k__norank_d__Bacteria	p__Actinobacteria	c__Actinobacteria	o__Acidimicrobiales	f__norank_o__Acidimicrobiales	g__norank_o__Acidimicrobiales	s__unclassified_g__norank_o__Acidimicrobiales	OTU429	4	6	4	6	3	2	5	3	2	10	5	5	55
d__Bacteria	k__norank_d__Bacteria	p__Proteobacteria	c__Alphaproteobacteria	o__Rhodospirillales	f__DA111	g__norank_f__DA111	s__unclassified_g__norank_f__DA111	OTU2124	0	1	1	6	1	6	7	2	0	2	0	1	27
d__Bacteria	k__norank_d__Bacteria	p__Chloroflexi	c__Thermomicrobia	o__JG30-KF-CM45	f__norank_o__JG30-KF-CM45	g__norank_o__JG30-KF-CM45	s__unclassified_g__norank_o__JG30-KF-CM45	OTU600	0	5	1	6	11	11	0	1	1	126	28	31	221
d__Bacteria	k__norank_d__Bacteria	p__Actinobacteria	c__Actinobacteria	o__Solirubrobacterales	f__FFCH11085	g__norank_f__FFCH11085	s__uncultured_bacterium_g__norank_f__FFCH11085	OTU2573	13	4	14	25	18	14	52	27	55	221	112	102	657
d__Bacteria	k__norank_d__Bacteria	p__Firmicutes	c__Clostridia	o__Clostridiales	f__Clostridiaceae_2	g__Alkaliphilus	s__uncultured_Alkaliphilus_sp._g__Alkaliphilus	OTU3178	1	2	0	7	3	1	1	0	1	0	0	0	16
d__Bacteria	k__norank_d__Bacteria	p__Actinobacteria	c__Actinobacteria	o__Solirubrobacterales	f__Parviterribacteraceae	g__Parviterribacter	s__uncultured_bacterium_g__Parviterribacter	OTU3084	31	29	25	72	41	46	72	28	39	28	10	8	429
d__Bacteria	k__norank_d__Bacteria	p__Acidobacteria	c__Acidobacteria	o__Subgroup_7	f__norank_o__Subgroup_7	g__norank_o__Subgroup_7	s__unclassified_g__norank_o__Subgroup_7	OTU944	16	19	6	6	10	18	15	15	11	3	0	0	119
d__Bacteria	k__norank_d__Bacteria	p__Chloroflexi	c__Anaerolineae	o__Anaerolineales	f__Anaerolineaceae	g__norank_f__Anaerolineaceae	s__uncultured_Caldilineaceae_bacterium_g__norank_f__Anaerolineaceae	OTU1602	2	1	0	2	4	0	8	8	4	7	3	2	41
d__Bacteria	k__norank_d__Bacteria	p__Proteobacteria	c__Deltaproteobacteria	o__Bdellovibrionales	f__Bdellovibrionaceae	g__Bdellovibrio	s__unclassified_g__Bdellovibrio	OTU1991	0	0	0	1	6	0	3	1	0	0	0	0	11
d__Bacteria	k__norank_d__Bacteria	p__Proteobacteria	c__Deltaproteobacteria	o__Myxococcales	f__Polyangiaceae	g__Polyangium	s__uncultured_bacterium_g__Polyangium	OTU2265	5	4	5	6	13	14	11	8	8	1	0	0	75
d__Bacteria	k__norank_d__Bacteria	p__Chloroflexi	c__S085	o__norank_c__S085	f__norank_c__S085	g__norank_c__S085	s__unclassified_g__norank_c__S085	OTU2434	16	23	8	7	9	7	31	29	22	3	1	9	165
d__Bacteria	k__norank_d__Bacteria	p__Chloroflexi	c__Ktedonobacteria	o__C0119	f__norank_o__C0119	g__norank_o__C0119	s__unclassified_g__norank_o__C0119	OTU2453	3	3	0	0	1	0	15	11	7	0	0	0	40
d__Bacteria	k__norank_d__Bacteria	p__Gemmatimonadetes	c__Gemmatimonadetes	o__Gemmatimonadales	f__Gemmatimonadaceae	g__norank_f__Gemmatimonadaceae	s__unclassified_g__norank_f__Gemmatimonadaceae	OTU3092	1	1	0	4	0	2	0	0	0	2	1	0	11
d__Bacteria	k__norank_d__Bacteria	p__Proteobacteria	c__Gammaproteobacteria	o__Legionellales	f__Legionellaceae	g__Legionella	s__unclassified_g__Legionella	OTU252	1	1	1	0	0	0	0	0	0	0	0	0	3
d__Bacteria	k__norank_d__Bacteria	p__Planctomycetes	c__Planctomycetacia	o__Planctomycetales	f__Planctomycetaceae	g__unclassified_f__Planctomycetaceae	s__unclassified_f__Planctomycetaceae	OTU1372	2	1	3	5	0	0	0	3	2	0	0	0	16
d__Bacteria	k__norank_d__Bacteria	p__Planctomycetes	c__Planctomycetacia	o__Planctomycetales	f__Planctomycetaceae	g__Pir4_lineage	s__unclassified_g__Pir4_lineage	OTU1671	20	7	10	6	6	1	2	8	3	4	6	2	75
d__Bacteria	k__norank_d__Bacteria	p__Proteobacteria	c__Deltaproteobacteria	o__Myxococcales	f__VHS-B3-70	g__norank_f__VHS-B3-70	s__uncultured_bacterium_g__norank_f__VHS-B3-70	OTU2406	4	6	3	7	2	4	14	7	4	0	0	0	51
d__Bacteria	k__norank_d__Bacteria	p__Bacteroidetes	c__Sphingobacteriia	o__Sphingobacteriales	f__Chitinophagaceae	g__Flavisolibacter	s__unclassified_g__Flavisolibacter	OTU1517	0	0	0	0	0	0	13	2	6	0	1	0	22
d__Bacteria	k__norank_d__Bacteria	p__Chloroflexi	c__TK10	o__norank_c__TK10	f__norank_c__TK10	g__norank_c__TK10	s__uncultured_bacterium_g__norank_c__TK10	OTU1336	2	1	0	6	0	7	4	6	4	0	0	1	31
d__Bacteria	k__norank_d__Bacteria	p__Proteobacteria	c__Deltaproteobacteria	o__Oligoflexales	f__0319-6G20	g__norank_f__0319-6G20	s__unclassified_g__norank_f__0319-6G20	OTU623	0	1	0	1	1	0	1	0	0	1	1	0	6
d__Bacteria	k__norank_d__Bacteria	p__Proteobacteria	c__Gammaproteobacteria	o__Xanthomonadales	f__unclassified_o__Xanthomonadales	g__unclassified_o__Xanthomonadales	s__unclassified_o__Xanthomonadales	OTU1847	6	2	2	5	6	3	5	6	1	5	3	0	44
d__Bacteria	k__norank_d__Bacteria	p__Planctomycetes	c__Planctomycetacia	o__Planctomycetales	f__Planctomycetaceae	g__Pir4_lineage	s__uncultured_bacterium_g__Pir4_lineage	OTU1456	36	20	15	24	13	1	10	8	10	31	13	8	189
d__Bacteria	k__norank_d__Bacteria	p__Planctomycetes	c__Planctomycetacia	o__Planctomycetales	f__Planctomycetaceae	g__norank_f__Planctomycetaceae	s__unclassified_g__norank_f__Planctomycetaceae	OTU104	1	0	1	3	3	0	1	0	1	0	0	0	10
d__Bacteria	k__norank_d__Bacteria	p__Planctomycetes	c__Planctomycetacia	o__Planctomycetales	f__Planctomycetaceae	g__norank_f__Planctomycetaceae	s__unclassified_g__norank_f__Planctomycetaceae	OTU108	1	1	3	2	0	0	1	2	0	1	0	0	11
d__Bacteria	k__norank_d__Bacteria	p__Chloroflexi	c__Ardenticatenia	o__Ardenticatenales	f__norank_o__Ardenticatenales	g__norank_o__Ardenticatenales	s__uncultured_bacterium_g__norank_o__Ardenticatenales	OTU2762	3	1	2	1	4	0	3	1	0	0	0	0	15
d__Bacteria	k__norank_d__Bacteria	p__Proteobacteria	c__Betaproteobacteria	o__Burkholderiales	f__Comamonadaceae	g__unclassified_f__Comamonadaceae	s__unclassified_f__Comamonadaceae	OTU1893	1	1	2	1	1	2	9	4	4	0	0	1	26
d__Bacteria	k__norank_d__Bacteria	p__Proteobacteria	c__Alphaproteobacteria	o__Rhizobiales	f__Hyphomicrobiaceae	g__Devosia	s__Devosia_submarina	OTU2805	15	5	4	6	12	12	18	24	10	21	18	8	153
d__Bacteria	k__norank_d__Bacteria	p__Actinobacteria	c__Actinobacteria	o__Solirubrobacterales	f__TM146	g__norank_f__TM146	s__uncultured_bacterium_g__norank_f__TM146	OTU551	0	0	0	0	0	0	0	0	0	10	4	9	23
d__Bacteria	k__norank_d__Bacteria	p__Proteobacteria	c__Alphaproteobacteria	o__Rhodospirillales	f__Rhodospirillales_Incertae_Sedis	g__Candidatus_Alysiosphaera	s__uncultured_bacterium_g__Candidatus_Alysiosphaera	OTU1493	0	2	1	3	4	3	3	2	2	0	1	0	21
d__Bacteria	k__norank_d__Bacteria	p__Chloroflexi	c__Thermomicrobia	o__JG30-KF-CM45	f__norank_o__JG30-KF-CM45	g__norank_o__JG30-KF-CM45	s__unclassified_g__norank_o__JG30-KF-CM45	OTU846	1	1	2	0	3	2	3	2	0	12	8	2	36
d__Bacteria	k__norank_d__Bacteria	p__Planctomycetes	c__Planctomycetacia	o__Planctomycetales	f__Planctomycetaceae	g__unclassified_f__Planctomycetaceae	s__unclassified_f__Planctomycetaceae	OTU2574	1	0	0	0	0	0	2	1	0	0	2	2	8
d__Bacteria	k__norank_d__Bacteria	p__Actinobacteria	c__Actinobacteria	o__Solirubrobacterales	f__unclassified_o__Solirubrobacterales	g__unclassified_o__Solirubrobacterales	s__unclassified_o__Solirubrobacterales	OTU2226	10	8	13	31	23	37	21	21	18	29	10	17	238
d__Bacteria	k__norank_d__Bacteria	p__Chloroflexi	c__Anaerolineae	o__Anaerolineales	f__Anaerolineaceae	g__norank_f__Anaerolineaceae	s__unclassified_g__norank_f__Anaerolineaceae	OTU2338	14	11	9	1	7	0	9	8	1	0	1	2	63
d__Bacteria	k__norank_d__Bacteria	p__Acidobacteria	c__Acidobacteria	o__Solibacterales	f__Solibacteraceae__Subgroup_3_	g__Bryobacter	s__unclassified_g__Bryobacter	OTU2857	48	37	16	25	46	32	92	23	18	10	6	11	364
d__Bacteria	k__norank_d__Bacteria	p__Proteobacteria	c__Alphaproteobacteria	o__Rickettsiales	f__Anaplasmataceae	g__Wolbachia	s__unclassified_g__Wolbachia	OTU717	0	0	0	0	0	0	0	0	0	3	5	6	14
d__Bacteria	k__norank_d__Bacteria	p__Actinobacteria	c__Actinobacteria	o__Frankiales	f__Sporichthyaceae	g__norank_f__Sporichthyaceae	s__uncultured_bacterium_g__norank_f__Sporichthyaceae	OTU2235	14	6	9	16	16	16	26	18	14	1	0	0	136
d__Bacteria	k__norank_d__Bacteria	p__Gemmatimonadetes	c__Gemmatimonadetes	o__Gemmatimonadales	f__Gemmatimonadaceae	g__Gemmatirosa	s__uncultured_bacterium_g__Gemmatirosa	OTU2738	0	0	0	1	0	0	4	1	2	4	0	2	14
d__Bacteria	k__norank_d__Bacteria	p__Firmicutes	c__Clostridia	o__Halanaerobiales	f__Halanaerobiaceae	g__Halocella	s__uncultured_Firmicutes_bacterium_g__Halocella	OTU1296	1	0	0	5	2	0	0	6	1	0	0	0	15
d__Bacteria	k__norank_d__Bacteria	p__unclassified_k__norank_d__Bacteria	c__unclassified_k__norank_d__Bacteria	o__unclassified_k__norank_d__Bacteria	f__unclassified_k__norank_d__Bacteria	g__unclassified_k__norank_d__Bacteria	s__unclassified_k__norank_d__Bacteria	OTU2224	5	5	1	9	7	6	6	3	2	0	0	1	45
d__Bacteria	k__norank_d__Bacteria	p__Proteobacteria	c__Deltaproteobacteria	o__Myxococcales	f__Phaselicystidaceae	g__Phaselicystis	s__uncultured_Polyangiaceae_bacterium_g__Phaselicystis	OTU2479	10	5	12	9	12	14	14	7	5	1	0	4	93
d__Bacteria	k__norank_d__Bacteria	p__Proteobacteria	c__Alphaproteobacteria	o__Rhodospirillales	f__Rhodospirillales_Incertae_Sedis	g__Reyranella	s__unclassified_g__Reyranella	OTU2641	23	9	11	34	37	17	25	30	9	16	19	22	252
d__Bacteria	k__norank_d__Bacteria	p__Proteobacteria	c__Alphaproteobacteria	o__Rhodospirillales	f__Rhodospirillales_Incertae_Sedis	g__Candidatus_Alysiosphaera	s__uncultured_bacterium_g__Candidatus_Alysiosphaera	OTU1274	13	8	3	10	15	19	25	18	12	8	6	4	141
d__Bacteria	k__norank_d__Bacteria	p__Acidobacteria	c__Acidobacteria	o__Subgroup_10	f__ABS-19	g__norank_f__ABS-19	s__unclassified_g__norank_f__ABS-19	OTU548	38	40	44	60	38	55	101	34	28	133	12	63	646
d__Bacteria	k__norank_d__Bacteria	p__Verrucomicrobia	c__OPB35_soil_group	o__norank_c__OPB35_soil_group	f__norank_c__OPB35_soil_group	g__norank_c__OPB35_soil_group	s__uncultured_subdivision_3_bacterium	OTU1813	8	6	6	31	40	1	17	6	3	0	1	0	119
d__Bacteria	k__norank_d__Bacteria	p__Actinobacteria	c__Actinobacteria	o__Gaiellales	f__Gaiellaceae	g__Gaiella	s__unclassified_g__Gaiella	OTU1075	2	3	4	8	5	6	13	14	12	2	1	5	75
d__Bacteria	k__norank_d__Bacteria	p__Proteobacteria	c__Deltaproteobacteria	o__Bdellovibrionales	f__Bdellovibrionaceae	g__Bdellovibrio	s__unclassified_g__Bdellovibrio	OTU2423	3	1	1	3	2	2	2	5	1	4	1	1	26
d__Bacteria	k__norank_d__Bacteria	p__Actinobacteria	c__Actinobacteria	o__Acidimicrobiales	f__norank_o__Acidimicrobiales	g__norank_o__Acidimicrobiales	s__unclassified_g__norank_o__Acidimicrobiales	OTU1086	7	6	8	25	8	15	13	10	15	12	3	6	128
d__Bacteria	k__norank_d__Bacteria	p__Chloroflexi	c__Chloroflexia	o__Chloroflexales	f__Chloroflexaceae	g__unclassified_f__Chloroflexaceae	s__unclassified_f__Chloroflexaceae	OTU452	4	2	4	4	3	1	4	5	3	0	0	0	30
d__Bacteria	k__norank_d__Bacteria	p__Actinobacteria	c__Actinobacteria	o__norank_c__Actinobacteria	f__norank_c__Actinobacteria	g__norank_c__Actinobacteria	s__unclassified_g__norank_c__Actinobacteria	OTU773	3	0	1	20	3	0	19	11	15	23	13	17	125
d__Bacteria	k__norank_d__Bacteria	p__Actinobacteria	c__Actinobacteria	o__Solirubrobacterales	f__FFCH13075	g__norank_f__FFCH13075	s__uncultured_bacterium_g__norank_f__FFCH13075	OTU2257	163	143	115	246	193	205	302	145	163	52	21	33	1781
d__Bacteria	k__norank_d__Bacteria	p__Proteobacteria	c__Alphaproteobacteria	o__Rhodospirillales	f__unclassified_o__Rhodospirillales	g__unclassified_o__Rhodospirillales	s__unclassified_o__Rhodospirillales	OTU2279	9	3	3	5	6	6	22	11	10	0	0	0	75
d__Bacteria	k__norank_d__Bacteria	p__Gemmatimonadetes	c__Gemmatimonadetes	o__Gemmatimonadales	f__Gemmatimonadaceae	g__norank_f__Gemmatimonadaceae	s__Gemmatimonadetes_bacterium_LX87	OTU493	1	3	2	0	1	1	0	2	0	0	0	0	10
d__Bacteria	k__norank_d__Bacteria	p__Proteobacteria	c__Alphaproteobacteria	o__Rhizobiales	f__unclassified_o__Rhizobiales	g__unclassified_o__Rhizobiales	s__unclassified_o__Rhizobiales	OTU712	1	0	0	0	1	1	0	0	0	29	10	34	76
d__Bacteria	k__norank_d__Bacteria	p__Acidobacteria	c__Acidobacteria	o__norank_c__Acidobacteria	f__norank_c__Acidobacteria	g__norank_c__Acidobacteria	s__unclassified_g__norank_c__Acidobacteria	OTU3010	3	2	1	12	2	0	3	2	1	2	0	1	29
d__Bacteria	k__norank_d__Bacteria	p__Proteobacteria	c__Deltaproteobacteria	o__unclassified_c__Deltaproteobacteria	f__unclassified_c__Deltaproteobacteria	g__unclassified_c__Deltaproteobacteria	s__unclassified_c__Deltaproteobacteria	OTU477	0	2	0	2	2	1	0	0	0	1	0	0	8
d__Bacteria	k__norank_d__Bacteria	p__Chloroflexi	c__KD4-96	o__norank_c__KD4-96	f__norank_c__KD4-96	g__norank_c__KD4-96	s__unclassified_g__norank_c__KD4-96	OTU472	2	5	5	2	3	2	1	5	1	5	2	4	37
d__Bacteria	k__norank_d__Bacteria	p__Acidobacteria	c__Acidobacteria	o__norank_c__Acidobacteria	f__norank_c__Acidobacteria	g__norank_c__Acidobacteria	s__unclassified_g__norank_c__Acidobacteria	OTU3017	0	2	1	39	3	5	0	0	0	1	1	0	52
d__Bacteria	k__norank_d__Bacteria	p__Planctomycetes	c__Planctomycetacia	o__Planctomycetales	f__Planctomycetaceae	g__norank_f__Planctomycetaceae	s__uncultured_bacterium_g__norank_f__Planctomycetaceae	OTU2690	0	0	0	1	0	0	2	1	0	0	1	0	5
d__Bacteria	k__norank_d__Bacteria	p__unclassified_k__norank_d__Bacteria	c__unclassified_k__norank_d__Bacteria	o__unclassified_k__norank_d__Bacteria	f__unclassified_k__norank_d__Bacteria	g__unclassified_k__norank_d__Bacteria	s__unclassified_k__norank_d__Bacteria	OTU1727	7	7	4	14	7	12	6	2	4	0	0	0	63
d__Bacteria	k__norank_d__Bacteria	p__Chloroflexi	c__JG30-KF-CM66	o__norank_c__JG30-KF-CM66	f__norank_c__JG30-KF-CM66	g__norank_c__JG30-KF-CM66	s__unclassified_g__norank_c__JG30-KF-CM66	OTU232	4	0	0	0	1	1	0	1	0	0	0	1	8
d__Bacteria	k__norank_d__Bacteria	p__Cyanobacteria	c__Cyanobacteria	o__SubsectionIII	f__FamilyI_o__SubsectionIII	g__unclassified_f__FamilyI_o__SubsectionIII	s__unclassified_f__FamilyI_o__SubsectionIII	OTU2429	33	8	9	0	4	0	41	3	0	0	0	0	98
d__Bacteria	k__norank_d__Bacteria	p__Proteobacteria	c__Alphaproteobacteria	o__Rhodospirillales	f__Rhodospirillales_Incertae_Sedis	g__Candidatus_Alysiosphaera	s__uncultured_bacterium_g__Candidatus_Alysiosphaera	OTU1872	30	14	14	32	36	34	72	35	30	39	13	27	376
d__Bacteria	k__norank_d__Bacteria	p__Chloroflexi	c__Chloroflexia	o__Kallotenuales	f__AKIW781	g__norank_f__AKIW781	s__unclassified_g__norank_f__AKIW781	OTU2754	1	2	4	4	5	7	2	0	3	0	0	0	28
d__Bacteria	k__norank_d__Bacteria	p__Actinobacteria	c__Actinobacteria	o__Euzebyales	f__Euzebyaceae	g__Euzebya	s__uncultured_bacterium_g__Euzebya	OTU558	0	1	0	0	0	3	1	0	1	8	0	0	14
d__Bacteria	k__norank_d__Bacteria	p__Armatimonadetes	c__norank_p__Armatimonadetes	o__norank_p__Armatimonadetes	f__norank_p__Armatimonadetes	g__norank_p__Armatimonadetes	s__unclassified_g__norank_p__Armatimonadetes	OTU2849	1	1	0	0	1	0	3	2	0	0	0	0	8
d__Bacteria	k__norank_d__Bacteria	p__Bacteroidetes	c__Cytophagia	o__Cytophagales	f__Cytophagaceae	g__norank_f__Cytophagaceae	s__unclassified_g__norank_f__Cytophagaceae	OTU2845	25	49	12	31	92	34	29	15	5	12	5	4	313
d__Bacteria	k__norank_d__Bacteria	p__Chloroflexi	c__Anaerolineae	o__Anaerolineales	f__Anaerolineaceae	g__norank_f__Anaerolineaceae	s__unclassified_g__norank_f__Anaerolineaceae	OTU2321	2	0	1	0	1	0	1	0	0	0	0	0	5
d__Bacteria	k__norank_d__Bacteria	p__Planctomycetes	c__Planctomycetacia	o__Planctomycetales	f__Planctomycetaceae	g__norank_f__Planctomycetaceae	s__unclassified_g__norank_f__Planctomycetaceae	OTU2601	2	1	0	1	1	0	3	1	2	0	0	0	11
d__Bacteria	k__norank_d__Bacteria	p__Bacteroidetes	c__Sphingobacteriia	o__Sphingobacteriales	f__Chitinophagaceae	g__Flavitalea	s__unclassified_g__Flavitalea	OTU3073	58	20	29	27	49	13	122	44	25	6	3	3	399
d__Bacteria	k__norank_d__Bacteria	p__Proteobacteria	c__Gammaproteobacteria	o__Xanthomonadales	f__Xanthomonadaceae	g__Lysobacter	s__uncultured_Lysobacter_sp._g__Lysobacter	OTU936	0	0	0	1	1	4	0	0	0	34	29	17	86
d__Bacteria	k__norank_d__Bacteria	p__Actinobacteria	c__Actinobacteria	o__Acidimicrobiales	f__norank_o__Acidimicrobiales	g__norank_o__Acidimicrobiales	s__unclassified_g__norank_o__Acidimicrobiales	OTU1933	0	0	0	0	0	0	3	2	1	0	0	0	6
d__Bacteria	k__norank_d__Bacteria	p__Chloroflexi	c__Chloroflexia	o__Chloroflexales	f__Roseiflexaceae	g__Roseiflexus	s__uncultured_bacterium_g__Roseiflexus	OTU1065	16	9	8	18	7	20	19	13	12	0	0	0	122
d__Bacteria	k__norank_d__Bacteria	p__Chloroflexi	c__Anaerolineae	o__Anaerolineales	f__Anaerolineaceae	g__norank_f__Anaerolineaceae	s__unclassified_g__norank_f__Anaerolineaceae	OTU140	3	1	0	0	3	0	1	1	0	0	0	0	9
d__Bacteria	k__norank_d__Bacteria	p__Proteobacteria	c__Deltaproteobacteria	o__Desulfurellales	f__Desulfurellaceae	g__H16	s__unclassified_g__H16	OTU366	3	1	5	7	5	2	2	1	0	1	0	0	27
d__Bacteria	k__norank_d__Bacteria	p__Actinobacteria	c__Actinobacteria	o__Solirubrobacterales	f__Solirubrobacteraceae	g__Solirubrobacter	s__unclassified_g__Solirubrobacter	OTU1766	4	0	1	5	5	2	5	1	6	4	1	1	35
d__Bacteria	k__norank_d__Bacteria	p__Acidobacteria	c__Acidobacteria	o__Subgroup_7	f__norank_o__Subgroup_7	g__norank_o__Subgroup_7	s__uncultured_soil_bacterium_g__norank_o__Subgroup_7	OTU1490	3	0	1	1	0	0	7	3	0	0	0	0	15
d__Bacteria	k__norank_d__Bacteria	p__Proteobacteria	c__Alphaproteobacteria	o__Sphingomonadales	f__Sphingomonadaceae	g__unclassified_f__Sphingomonadaceae	s__unclassified_f__Sphingomonadaceae	OTU753	0	0	0	1	0	0	0	0	0	7	7	6	21
d__Bacteria	k__norank_d__Bacteria	p__unclassified_k__norank_d__Bacteria	c__unclassified_k__norank_d__Bacteria	o__unclassified_k__norank_d__Bacteria	f__unclassified_k__norank_d__Bacteria	g__unclassified_k__norank_d__Bacteria	s__unclassified_k__norank_d__Bacteria	OTU3199	0	0	0	0	3	0	3	1	0	0	0	0	7
d__Bacteria	k__norank_d__Bacteria	p__unclassified_k__norank_d__Bacteria	c__unclassified_k__norank_d__Bacteria	o__unclassified_k__norank_d__Bacteria	f__unclassified_k__norank_d__Bacteria	g__unclassified_k__norank_d__Bacteria	s__unclassified_k__norank_d__Bacteria	OTU3195	0	1	0	0	2	0	3	0	0	0	0	0	6
d__Bacteria	k__norank_d__Bacteria	p__Proteobacteria	c__Deltaproteobacteria	o__Myxococcales	f__Polyangiaceae	g__Sorangium	s__unclassified_g__Sorangium	OTU1415	4	4	6	2	3	2	0	2	0	4	2	1	30
d__Bacteria	k__norank_d__Bacteria	p__Chloroflexi	c__KD4-96	o__norank_c__KD4-96	f__norank_c__KD4-96	g__norank_c__KD4-96	s__unclassified_g__norank_c__KD4-96	OTU895	2	9	1	3	7	0	7	5	6	15	4	5	64
d__Bacteria	k__norank_d__Bacteria	p__Planctomycetes	c__Phycisphaerae	o__Tepidisphaerales	f__Tepidisphaeraceae	g__norank_f__Tepidisphaeraceae	s__uncultured_planctomycete_g__norank_f__Tepidisphaeraceae	OTU2998	27	28	11	98	23	0	21	9	6	4	0	0	227
d__Bacteria	k__norank_d__Bacteria	p__Actinobacteria	c__Actinobacteria	o__Frankiales	f__Geodermatophilaceae	g__Geodermatophilus	s__unclassified_g__Geodermatophilus	OTU2820	25	29	20	111	90	117	72	41	40	149	57	57	808
d__Bacteria	k__norank_d__Bacteria	p__Gemmatimonadetes	c__Gemmatimonadetes	o__Longimicrobiales	f__Longimicrobiaceae	g__norank_f__Longimicrobiaceae	s__uncultured_bacterium_g__norank_f__Longimicrobiaceae	OTU302	4	2	0	9	2	12	7	5	7	0	0	1	49
d__Bacteria	k__norank_d__Bacteria	p__Chloroflexi	c__Ktedonobacteria	o__C0119	f__norank_o__C0119	g__norank_o__C0119	s__uncultured_bacterium_g__norank_o__C0119	OTU303	1	0	0	0	1	0	0	0	0	0	0	0	2
d__Bacteria	k__norank_d__Bacteria	p__Bacteroidetes	c__Cytophagia	o__Cytophagales	f__Cytophagaceae	g__Rhodocytophaga	s__uncultured_Rhodocytophaga_sp.	OTU2346	5	1	6	4	13	2	32	17	3	2	0	1	86
d__Bacteria	k__norank_d__Bacteria	p__Planctomycetes	c__Pla3_lineage	o__norank_c__Pla3_lineage	f__norank_c__Pla3_lineage	g__norank_c__Pla3_lineage	s__uncultured_bacterium_g__norank_c__Pla3_lineage	OTU1783	7	1	4	0	0	0	4	1	1	0	0	0	18
d__Bacteria	k__norank_d__Bacteria	p__Proteobacteria	c__Alphaproteobacteria	o__Sphingomonadales	f__unclassified_o__Sphingomonadales	g__unclassified_o__Sphingomonadales	s__unclassified_o__Sphingomonadales	OTU591	6	8	2	8	10	10	15	12	9	57	31	23	191
d__Bacteria	k__norank_d__Bacteria	p__Actinobacteria	c__Actinobacteria	o__Corynebacteriales	f__Mycobacteriaceae	g__Mycobacterium	s__unclassified_g__Mycobacterium	OTU924	7	4	5	10	6	10	3	6	3	72	53	63	242
d__Bacteria	k__norank_d__Bacteria	p__Saccharibacteria	c__norank_p__Saccharibacteria	o__norank_p__Saccharibacteria	f__norank_p__Saccharibacteria	g__norank_p__Saccharibacteria	s__uncultured_bacterium_g__norank_p__Saccharibacteria	OTU1749	1	1	0	0	2	1	4	6	0	0	0	0	15
d__Bacteria	k__norank_d__Bacteria	p__Acidobacteria	c__Acidobacteria	o__Solibacterales	f__Solibacteraceae__Subgroup_3_	g__Bryobacter	s__unclassified_g__Bryobacter	OTU1520	2	1	3	2	4	1	11	11	4	3	0	0	42
d__Bacteria	k__norank_d__Bacteria	p__Proteobacteria	c__Alphaproteobacteria	o__Rhizobiales	f__JG34-KF-361	g__norank_f__JG34-KF-361	s__unclassified_g__norank_f__JG34-KF-361	OTU556	0	0	1	1	1	0	0	0	0	18	6	7	34
d__Bacteria	k__norank_d__Bacteria	p__Proteobacteria	c__Gammaproteobacteria	o__Xanthomonadales	f__Xanthomonadaceae	g__unclassified_f__Xanthomonadaceae	s__unclassified_f__Xanthomonadaceae	OTU2090	3	2	3	6	1	1	3	3	2	0	2	6	32
d__Bacteria	k__norank_d__Bacteria	p__Planctomycetes	c__Planctomycetacia	o__Planctomycetales	f__Planctomycetaceae	g__norank_f__Planctomycetaceae	s__unclassified_g__norank_f__Planctomycetaceae	OTU1800	10	2	3	1	0	0	6	4	1	0	0	0	27
d__Bacteria	k__norank_d__Bacteria	p__Verrucomicrobia	c__OPB35_soil_group	o__norank_c__OPB35_soil_group	f__norank_c__OPB35_soil_group	g__norank_c__OPB35_soil_group	s__unclassified_g__norank_c__OPB35_soil_group	OTU2347	5	0	1	6	3	1	17	2	2	0	0	0	37
d__Bacteria	k__norank_d__Bacteria	p__Verrucomicrobia	c__OPB35_soil_group	o__norank_c__OPB35_soil_group	f__norank_c__OPB35_soil_group	g__norank_c__OPB35_soil_group	s__unclassified_g__norank_c__OPB35_soil_group	OTU2340	52	9	23	23	18	5	54	18	14	0	0	1	217
d__Bacteria	k__norank_d__Bacteria	p__BRC1	c__norank_p__BRC1	o__norank_p__BRC1	f__norank_p__BRC1	g__norank_p__BRC1	s__unclassified_g__norank_p__BRC1	OTU3019	3	1	0	6	2	1	2	0	0	2	0	1	18
d__Bacteria	k__norank_d__Bacteria	p__Proteobacteria	c__Gammaproteobacteria	o__Xanthomonadales	f__Xanthomonadaceae	g__Arenimonas	s__unclassified_g__Arenimonas	OTU1791	7	8	9	9	7	13	13	8	7	17	6	3	107
d__Bacteria	k__norank_d__Bacteria	p__Chloroflexi	c__Anaerolineae	o__Anaerolineales	f__Anaerolineaceae	g__norank_f__Anaerolineaceae	s__unclassified_g__norank_f__Anaerolineaceae	OTU2219	16	18	2	11	11	1	38	4	12	0	0	0	113
d__Bacteria	k__norank_d__Bacteria	p__Chloroflexi	c__Anaerolineae	o__Anaerolineales	f__Anaerolineaceae	g__norank_f__Anaerolineaceae	s__unclassified_g__norank_f__Anaerolineaceae	OTU2217	12	2	4	4	7	0	27	12	9	0	1	0	78
d__Bacteria	k__norank_d__Bacteria	p__Chloroflexi	c__Anaerolineae	o__Anaerolineales	f__Anaerolineaceae	g__norank_f__Anaerolineaceae	s__unclassified_g__norank_f__Anaerolineaceae	OTU2212	14	31	3	0	2	0	5	11	2	0	0	0	68
d__Bacteria	k__norank_d__Bacteria	p__Proteobacteria	c__Deltaproteobacteria	o__Myxococcales	f__Haliangiaceae	g__Haliangium	s__unclassified_g__Haliangium	OTU1897	4	6	1	8	4	2	16	4	4	0	1	2	52
d__Bacteria	k__norank_d__Bacteria	p__Actinobacteria	c__Actinobacteria	o__Acidimicrobiales	f__norank_o__Acidimicrobiales	g__norank_o__Acidimicrobiales	s__unclassified_g__norank_o__Acidimicrobiales	OTU1946	2	0	0	1	0	1	5	4	2	8	1	1	25
d__Bacteria	k__norank_d__Bacteria	p__Proteobacteria	c__Alphaproteobacteria	o__Rhizobiales	f__JG34-KF-361	g__norank_f__JG34-KF-361	s__unclassified_g__norank_f__JG34-KF-361	OTU2368	7	5	1	16	5	5	17	4	5	22	3	2	92
d__Bacteria	k__norank_d__Bacteria	p__Proteobacteria	c__Alphaproteobacteria	o__Rhodospirillales	f__Rhodospirillaceae	g__unclassified_f__Rhodospirillaceae	s__unclassified_f__Rhodospirillaceae	OTU1576	1	0	0	1	1	1	3	0	0	1	0	0	8
d__Bacteria	k__norank_d__Bacteria	p__Acidobacteria	c__Acidobacteria	o__Subgroup_10	f__ABS-19	g__norank_f__ABS-19	s__unclassified_g__norank_f__ABS-19	OTU943	14	8	8	19	14	10	12	1	2	13	3	5	109
d__Bacteria	k__norank_d__Bacteria	p__Planctomycetes	c__OM190	o__norank_c__OM190	f__norank_c__OM190	g__norank_c__OM190	s__uncultured_bacterium_g__norank_c__OM190	OTU3246	8	3	7	1	2	0	0	2	1	0	0	0	24
d__Bacteria	k__norank_d__Bacteria	p__unclassified_k__norank_d__Bacteria	c__unclassified_k__norank_d__Bacteria	o__unclassified_k__norank_d__Bacteria	f__unclassified_k__norank_d__Bacteria	g__unclassified_k__norank_d__Bacteria	s__unclassified_k__norank_d__Bacteria	OTU2915	0	0	0	1	1	3	0	0	0	0	0	0	5
d__Bacteria	k__norank_d__Bacteria	p__Proteobacteria	c__Gammaproteobacteria	o__unclassified_c__Gammaproteobacteria	f__unclassified_c__Gammaproteobacteria	g__unclassified_c__Gammaproteobacteria	s__unclassified_c__Gammaproteobacteria	OTU291	1	0	0	0	1	0	0	0	0	0	0	0	2
d__Bacteria	k__norank_d__Bacteria	p__Planctomycetes	c__Planctomycetacia	o__Planctomycetales	f__Planctomycetaceae	g__norank_f__Planctomycetaceae	s__unclassified_g__norank_f__Planctomycetaceae	OTU2420	1	0	1	11	1	0	1	1	1	8	0	2	27
d__Bacteria	k__norank_d__Bacteria	p__Proteobacteria	c__Deltaproteobacteria	o__Myxococcales	f__Haliangiaceae	g__Haliangium	s__unclassified_g__Haliangium	OTU2530	36	25	19	43	39	28	53	13	19	0	1	1	277
d__Bacteria	k__norank_d__Bacteria	p__Chloroflexi	c__unclassified_p__Chloroflexi	o__unclassified_p__Chloroflexi	f__unclassified_p__Chloroflexi	g__unclassified_p__Chloroflexi	s__unclassified_p__Chloroflexi	OTU2687	4	8	0	2	4	0	3	2	3	4	0	0	30
d__Bacteria	k__norank_d__Bacteria	p__Proteobacteria	c__unclassified_p__Proteobacteria	o__unclassified_p__Proteobacteria	f__unclassified_p__Proteobacteria	g__unclassified_p__Proteobacteria	s__unclassified_p__Proteobacteria	OTU1113	0	0	0	1	0	0	2	0	1	0	0	0	4
d__Bacteria	k__norank_d__Bacteria	p__Proteobacteria	c__Alphaproteobacteria	o__Sphingomonadales	f__Sphingomonadaceae	g__Novosphingobium	s__unclassified_g__Novosphingobium	OTU638	3	1	0	1	0	2	1	3	2	23	22	18	76
d__Bacteria	k__norank_d__Bacteria	p__Proteobacteria	c__Deltaproteobacteria	o__Myxococcales	f__Haliangiaceae	g__Haliangium	s__unclassified_g__Haliangium	OTU2539	2	0	0	2	2	1	4	0	0	1	0	0	12
d__Bacteria	k__norank_d__Bacteria	p__Proteobacteria	c__Deltaproteobacteria	o__Oligoflexales	f__Oligoflexaceae	g__norank_f__Oligoflexaceae	s__uncultured_bacterium_g__norank_f__Oligoflexaceae	OTU1459	2	0	4	0	3	1	1	1	0	0	1	1	14
d__Bacteria	k__norank_d__Bacteria	p__Actinobacteria	c__Actinobacteria	o__Propionibacteriales	f__Propionibacteriaceae	g__Friedmanniella	s__uncultured_bacterium_g__Friedmanniella	OTU2481	3	4	7	4	1	5	5	1	8	38	22	24	122
d__Bacteria	k__norank_d__Bacteria	p__Actinobacteria	c__Actinobacteria	o__unclassified_c__Actinobacteria	f__unclassified_c__Actinobacteria	g__unclassified_c__Actinobacteria	s__unclassified_c__Actinobacteria	OTU1924	0	0	0	2	0	0	1	0	4	0	0	0	7
d__Bacteria	k__norank_d__Bacteria	p__Actinobacteria	c__Actinobacteria	o__Solirubrobacterales	f__unclassified_o__Solirubrobacterales	g__unclassified_o__Solirubrobacterales	s__unclassified_o__Solirubrobacterales	OTU2221	31	25	24	47	39	30	67	36	59	21	16	17	412
d__Bacteria	k__norank_d__Bacteria	p__Proteobacteria	c__Deltaproteobacteria	o__NB1-j	f__norank_o__NB1-j	g__norank_o__NB1-j	s__uncultured_Myxococcales_bacterium_g__norank_o__NB1-j	OTU1349	3	0	2	12	9	3	2	4	0	0	0	0	35
d__Bacteria	k__norank_d__Bacteria	p__Firmicutes	c__Clostridia	o__Clostridiales	f__Ruminococcaceae	g__Ruminiclostridium_5	s__unclassified_g__Ruminiclostridium_5	OTU462	0	5	0	0	1	2	0	0	0	0	0	0	8
d__Bacteria	k__norank_d__Bacteria	p__Actinobacteria	c__Actinobacteria	o__unclassified_c__Actinobacteria	f__unclassified_c__Actinobacteria	g__unclassified_c__Actinobacteria	s__unclassified_c__Actinobacteria	OTU2528	1	0	0	1	1	0	2	0	0	6	5	9	25
d__Bacteria	k__norank_d__Bacteria	p__Planctomycetes	c__Planctomycetacia	o__Planctomycetales	f__Planctomycetaceae	g__Pirellula	s__unclassified_g__Pirellula	OTU1121	17	17	10	43	10	1	10	7	5	0	0	0	120
d__Bacteria	k__norank_d__Bacteria	p__Firmicutes	c__Bacilli	o__Bacillales	f__Paenibacillaceae	g__Paenibacillus	s__uncultured_Firmicutes_bacterium_g__Paenibacillus	OTU1071	1	2	0	0	0	3	0	0	2	9	6	0	23
d__Bacteria	k__norank_d__Bacteria	p__Chloroflexi	c__Thermomicrobia	o__JG30-KF-CM45	f__norank_o__JG30-KF-CM45	g__norank_o__JG30-KF-CM45	s__unclassified_g__norank_o__JG30-KF-CM45	OTU615	0	0	0	0	0	0	0	0	0	4	0	0	4
d__Bacteria	k__norank_d__Bacteria	p__Actinobacteria	c__Actinobacteria	o__Solirubrobacterales	f__Elev-16S-1332	g__norank_f__Elev-16S-1332	s__uncultured_actinobacterium_g__norank_f__Elev-16S-1332	OTU2516	7	17	3	13	10	10	23	7	12	17	5	6	130
d__Bacteria	k__norank_d__Bacteria	p__Gemmatimonadetes	c__Gemmatimonadetes	o__Gemmatimonadales	f__Gemmatimonadaceae	g__Gemmatimonas	s__unclassified_g__Gemmatimonas	OTU1889	9	7	7	22	16	18	26	6	13	0	3	0	127
d__Bacteria	k__norank_d__Bacteria	p__Gemmatimonadetes	c__Gemmatimonadetes	o__norank_c__Gemmatimonadetes	f__norank_c__Gemmatimonadetes	g__norank_c__Gemmatimonadetes	s__uncultured_bacterium_g__norank_c__Gemmatimonadetes	OTU3144	0	1	0	3	0	2	0	0	0	0	1	1	8
d__Bacteria	k__norank_d__Bacteria	p__Parcubacteria	c__unclassified_p__Parcubacteria	o__unclassified_p__Parcubacteria	f__unclassified_p__Parcubacteria	g__unclassified_p__Parcubacteria	s__unclassified_p__Parcubacteria	OTU3049	0	0	0	3	1	0	0	0	0	0	0	0	4
d__Bacteria	k__norank_d__Bacteria	p__Proteobacteria	c__Alphaproteobacteria	o__Rhodospirillales	f__DA111	g__norank_f__DA111	s__uncultured_alpha_proteobacterium_g__norank_f__DA111	OTU2386	0	0	1	0	2	1	2	2	1	4	0	0	13
d__Bacteria	k__norank_d__Bacteria	p__Planctomycetes	c__Planctomycetacia	o__Planctomycetales	f__Planctomycetaceae	g__Pir4_lineage	s__unclassified_g__Pir4_lineage	OTU257	4	1	1	0	3	0	0	0	0	2	1	1	13
d__Bacteria	k__norank_d__Bacteria	p__Actinobacteria	c__Actinobacteria	o__Frankiales	f__Geodermatophilaceae	g__Blastococcus	s__uncultured_Blastococcus_sp._g__Blastococcus	OTU833	739	462	393	858	804	764	1557	774	844	1342	575	616	9728
d__Bacteria	k__norank_d__Bacteria	p__Actinobacteria	c__Actinobacteria	o__Acidimicrobiales	f__Acidimicrobiales_Incertae_Sedis	g__Aciditerrimonas	s__uncultured_soil_bacterium_g__Aciditerrimonas	OTU2986	1	1	0	6	5	4	1	1	2	4	0	2	27
d__Bacteria	k__norank_d__Bacteria	p__Actinobacteria	c__Actinobacteria	o__norank_c__Actinobacteria	f__norank_c__Actinobacteria	g__norank_c__Actinobacteria	s__uncultured_bacterium_0425-2M17	OTU198	7	3	0	19	6	3	2	5	2	1	0	2	50
d__Bacteria	k__norank_d__Bacteria	p__Actinobacteria	c__Actinobacteria	o__norank_c__Actinobacteria	f__norank_c__Actinobacteria	g__norank_c__Actinobacteria	s__unclassified_g__norank_c__Actinobacteria	OTU1182	2	0	1	0	0	0	1	2	1	0	0	0	7
d__Bacteria	k__norank_d__Bacteria	p__Acidobacteria	c__Acidobacteria	o__norank_c__Acidobacteria	f__norank_c__Acidobacteria	g__norank_c__Acidobacteria	s__unclassified_g__norank_c__Acidobacteria	OTU893	0	0	0	3	0	0	1	2	0	0	1	1	8
d__Bacteria	k__norank_d__Bacteria	p__Proteobacteria	c__Alphaproteobacteria	o__Rhodospirillales	f__MSB-1E8	g__norank_f__MSB-1E8	s__uncultured_Rhodospirillales_bacterium_g__norank_f__MSB-1E8	OTU241	16	13	13	18	16	14	46	22	16	1	1	0	176
d__Bacteria	k__norank_d__Bacteria	p__unclassified_k__norank_d__Bacteria	c__unclassified_k__norank_d__Bacteria	o__unclassified_k__norank_d__Bacteria	f__unclassified_k__norank_d__Bacteria	g__unclassified_k__norank_d__Bacteria	s__unclassified_k__norank_d__Bacteria	OTU1119	1	0	0	0	1	2	1	0	1	0	0	0	6
d__Bacteria	k__norank_d__Bacteria	p__Cyanobacteria	c__Cyanobacteria	o__SubsectionIV	f__FamilyI_o__SubsectionIV	g__norank_f__FamilyI_o__SubsectionIV	s__unclassified_g__norank_f__FamilyI_o__SubsectionIV	OTU2281	0	0	0	2	0	0	32	0	2	0	0	0	36
d__Bacteria	k__norank_d__Bacteria	p__Gemmatimonadetes	c__Gemmatimonadetes	o__norank_c__Gemmatimonadetes	f__norank_c__Gemmatimonadetes	g__norank_c__Gemmatimonadetes	s__uncultured_Gemmatimonadetes_bacterium_g__norank_c__Gemmatimonadetes	OTU2937	5	0	0	18	3	63	1	0	1	0	0	0	91
d__Bacteria	k__norank_d__Bacteria	p__Proteobacteria	c__Alphaproteobacteria	o__Rhodospirillales	f__Rhodospirillaceae	g__Skermanella	s__uncultured_bacterium_g__Skermanella	OTU1015	97	32	76	140	127	166	193	100	85	51	55	88	1210
d__Bacteria	k__norank_d__Bacteria	p__Verrucomicrobia	c__Spartobacteria	o__Chthoniobacterales	f__DA101_soil_group	g__norank_f__DA101_soil_group	s__unclassified_g__norank_f__DA101_soil_group	OTU420	1	5	0	13	6	0	2	2	3	0	0	0	32
d__Bacteria	k__norank_d__Bacteria	p__Actinobacteria	c__Actinobacteria	o__Gaiellales	f__norank_o__Gaiellales	g__norank_o__Gaiellales	s__unclassified_g__norank_o__Gaiellales	OTU886	28	10	6	34	22	36	84	53	40	8	5	3	329
d__Bacteria	k__norank_d__Bacteria	p__Gemmatimonadetes	c__Gemmatimonadetes	o__Gemmatimonadales	f__Gemmatimonadaceae	g__Gemmatirosa	s__unclassified_g__Gemmatirosa	OTU51	1	1	2	2	1	1	3	1	5	0	1	0	18
d__Bacteria	k__norank_d__Bacteria	p__Gemmatimonadetes	c__Gemmatimonadetes	o__Gemmatimonadales	f__Gemmatimonadaceae	g__unclassified_f__Gemmatimonadaceae	s__unclassified_f__Gemmatimonadaceae	OTU3299	0	0	0	1	2	1	2	1	0	0	0	0	7
d__Bacteria	k__norank_d__Bacteria	p__Actinobacteria	c__Actinobacteria	o__Solirubrobacterales	f__Elev-16S-1332	g__norank_f__Elev-16S-1332	s__unclassified_g__norank_f__Elev-16S-1332	OTU1952	0	0	1	2	0	0	1	0	0	2	2	2	10
d__Bacteria	k__norank_d__Bacteria	p__Proteobacteria	c__Alphaproteobacteria	o__Rhodospirillales	f__DA111	g__norank_f__DA111	s__unclassified_g__norank_f__DA111	OTU3281	0	1	0	3	1	2	2	1	0	0	0	1	11
d__Bacteria	k__norank_d__Bacteria	p__unclassified_k__norank_d__Bacteria	c__unclassified_k__norank_d__Bacteria	o__unclassified_k__norank_d__Bacteria	f__unclassified_k__norank_d__Bacteria	g__unclassified_k__norank_d__Bacteria	s__unclassified_k__norank_d__Bacteria	OTU1930	0	0	0	1	0	0	1	0	0	0	0	0	2
d__Bacteria	k__norank_d__Bacteria	p__Bacteroidetes	c__Sphingobacteriia	o__Sphingobacteriales	f__Chitinophagaceae	g__Ferruginibacter	s__uncultured_Chitinophagaceae_bacterium_g__Ferruginibacter	OTU845	33	7	17	14	19	11	82	32	23	14	11	10	273
d__Bacteria	k__norank_d__Bacteria	p__Bacteroidetes	c__Cytophagia	o__Cytophagales	f__Cytophagaceae	g__Pontibacter	s__uncultured_Pontibacter_sp.	OTU2944	1	2	2	34	16	29	0	0	1	0	0	0	85
d__Bacteria	k__norank_d__Bacteria	p__Bacteroidetes	c__Cytophagia	o__Cytophagales	f__Cytophagaceae	g__Ohtaekwangia	s__unclassified_g__Ohtaekwangia	OTU2319	8	6	3	2	6	1	31	9	5	3	1	0	75
d__Bacteria	k__norank_d__Bacteria	p__Proteobacteria	c__Deltaproteobacteria	o__Myxococcales	f__BIrii41	g__norank_f__BIrii41	s__unclassified_g__norank_f__BIrii41	OTU2289	15	9	10	24	25	16	11	6	6	1	3	4	130
d__Bacteria	k__norank_d__Bacteria	p__Gemmatimonadetes	c__Gemmatimonadetes	o__norank_c__Gemmatimonadetes	f__norank_c__Gemmatimonadetes	g__norank_c__Gemmatimonadetes	s__unclassified_g__norank_c__Gemmatimonadetes	OTU2935	0	0	0	0	0	5	0	0	0	0	0	1	6
d__Bacteria	k__norank_d__Bacteria	p__Bacteroidetes	c__Sphingobacteriia	o__Sphingobacteriales	f__Chitinophagaceae	g__norank_f__Chitinophagaceae	s__unclassified_g__norank_f__Chitinophagaceae	OTU2741	63	22	16	66	67	37	132	49	34	9	4	3	502
d__Bacteria	k__norank_d__Bacteria	p__Actinobacteria	c__Actinobacteria	o__Acidimicrobiales	f__norank_o__Acidimicrobiales	g__norank_o__Acidimicrobiales	s__uncultured_soil_bacterium_g__norank_o__Acidimicrobiales	OTU430	3	5	0	2	1	1	3	3	2	4	0	2	26
d__Bacteria	k__norank_d__Bacteria	p__Actinobacteria	c__Actinobacteria	o__Acidimicrobiales	f__Acidimicrobiaceae	g__norank_f__Acidimicrobiaceae	s__unclassified_g__norank_f__Acidimicrobiaceae	OTU3175	2	5	3	6	4	2	6	1	2	4	3	5	43
d__Bacteria	k__norank_d__Bacteria	p__Acidobacteria	c__Acidobacteria	o__norank_c__Acidobacteria	f__norank_c__Acidobacteria	g__norank_c__Acidobacteria	s__unclassified_g__norank_c__Acidobacteria	OTU1463	21	6	10	8	7	0	15	13	8	4	0	0	92
d__Bacteria	k__norank_d__Bacteria	p__Proteobacteria	c__Alphaproteobacteria	o__Rhizobiales	f__Hyphomicrobiaceae	g__unclassified_f__Hyphomicrobiaceae	s__unclassified_f__Hyphomicrobiaceae	OTU191	22	9	10	26	18	13	23	14	10	5	6	3	159
d__Bacteria	k__norank_d__Bacteria	p__Latescibacteria	c__norank_p__Latescibacteria	o__norank_p__Latescibacteria	f__norank_p__Latescibacteria	g__norank_p__Latescibacteria	s__uncultured_Acidobacterium_sp._g__norank_p__Latescibacteria	OTU238	7	0	2	0	0	0	0	0	2	0	0	0	11
d__Bacteria	k__norank_d__Bacteria	p__Acidobacteria	c__Acidobacteria	o__Solibacterales	f__Solibacteraceae__Subgroup_3_	g__Bryobacter	s__unclassified_g__Bryobacter	OTU2195	7	10	6	10	9	14	14	6	4	2	1	5	88
d__Bacteria	k__norank_d__Bacteria	p__Cyanobacteria	c__Cyanobacteria	o__norank_c__Cyanobacteria	f__norank_c__Cyanobacteria	g__norank_c__Cyanobacteria	s__unclassified_g__norank_c__Cyanobacteria	OTU1438	1	1	0	0	0	0	1	1	0	0	0	0	4
d__Bacteria	k__norank_d__Bacteria	p__Armatimonadetes	c__Armatimonadia	o__Armatimonadales	f__norank_o__Armatimonadales	g__norank_o__Armatimonadales	s__uncultured_bacterium_g__norank_o__Armatimonadales	OTU865	0	0	0	0	0	0	0	0	0	1	1	2	4
d__Bacteria	k__norank_d__Bacteria	p__Proteobacteria	c__Alphaproteobacteria	o__Rhizobiales	f__Rhizobiales_Incertae_Sedis	g__Bauldia	s__unclassified_g__Bauldia	OTU2399	3	3	2	6	4	0	11	2	0	1	0	0	32
d__Bacteria	k__norank_d__Bacteria	p__Actinobacteria	c__Actinobacteria	o__Solirubrobacterales	f__unclassified_o__Solirubrobacterales	g__unclassified_o__Solirubrobacterales	s__unclassified_o__Solirubrobacterales	OTU2822	83	31	35	81	65	27	209	81	137	3	2	2	756
d__Bacteria	k__norank_d__Bacteria	p__Proteobacteria	c__Alphaproteobacteria	o__Caulobacterales	f__Caulobacteraceae	g__Brevundimonas	s__unclassified_g__Brevundimonas	OTU789	0	0	0	0	0	0	0	0	0	25	17	39	81
d__Bacteria	k__norank_d__Bacteria	p__Proteobacteria	c__Deltaproteobacteria	o__Myxococcales	f__Haliangiaceae	g__Haliangium	s__unclassified_g__Haliangium	OTU1653	0	1	2	1	3	3	6	2	3	0	0	0	21
d__Bacteria	k__norank_d__Bacteria	p__Proteobacteria	c__Alphaproteobacteria	o__Caulobacterales	f__Caulobacteraceae	g__norank_f__Caulobacteraceae	s__unclassified_g__norank_f__Caulobacteraceae	OTU522	0	0	0	0	0	1	0	0	0	21	2	3	27
d__Bacteria	k__norank_d__Bacteria	p__Actinobacteria	c__Actinobacteria	o__Solirubrobacterales	f__YNPFFP1	g__norank_f__YNPFFP1	s__unclassified_g__norank_f__YNPFFP1	OTU2207	2	2	1	10	5	4	5	3	1	14	9	5	61
d__Bacteria	k__norank_d__Bacteria	p__Proteobacteria	c__Gammaproteobacteria	o__Legionellales	f__Coxiellaceae	g__Aquicella	s__unclassified_g__Aquicella	OTU3269	0	0	0	1	2	0	0	0	0	0	0	0	3
d__Bacteria	k__norank_d__Bacteria	p__Proteobacteria	c__Alphaproteobacteria	o__Rhodobacterales	f__Rhodobacteraceae	g__unclassified_f__Rhodobacteraceae	s__unclassified_f__Rhodobacteraceae	OTU2877	0	1	0	2	0	3	0	1	0	19	5	5	36
d__Bacteria	k__norank_d__Bacteria	p__Proteobacteria	c__Alphaproteobacteria	o__Rickettsiales	f__Mitochondria	g__norank_f__Mitochondria	s__unclassified_g__norank_f__Mitochondria	OTU1118	0	1	0	2	23	0	1	6	1	0	1	1	36
d__Bacteria	k__norank_d__Bacteria	p__Actinobacteria	c__Actinobacteria	o__Acidimicrobiales	f__norank_o__Acidimicrobiales	g__norank_o__Acidimicrobiales	s__unclassified_g__norank_o__Acidimicrobiales	OTU852	1	0	0	0	0	0	0	0	3	20	3	15	42
[truncated: 1,498 more rows]
