# Supplementary material for: Change of soil microbial community under long-term fertilization in a reclaimed sandy agricultural ecosystem
Source: PeerJ. 2019 Feb 27;7:e6497. doi: 10.7717/peerj.6497 (PMC6397634; doi:10.7717/peerj.6497)
Supplement: Table S3 — The OTU numbers of bacteria in different samples by using a threshold of 0.97. [file peerj-07-6497-s005.xls]

## Sheet: OTU表
Domain	Kingdom	Phylum	Class	Order	Family	Genus	Species	OTU	CK1	SUM
d__Eukaryota	k__Fungi	p__Basidiomycota	c__Agaricostilbomycetes	o__Agaricostilbales	f__Agaricostilbaceae	g__Bensingtonia	s__unclassified_g__Bensingtonia	OTU159	1	1
d__Eukaryota	k__unclassified_d__Eukaryota	p__unclassified_d__Eukaryota	c__unclassified_d__Eukaryota	o__unclassified_d__Eukaryota	f__unclassified_d__Eukaryota	g__unclassified_d__Eukaryota	s__unclassified_d__Eukaryota	OTU195	1	1
d__Eukaryota	k__Fungi	p__Chytridiomycota	c__norank_p__Chytridiomycota	o__norank_p__Chytridiomycota	f__norank_p__Chytridiomycota	g__norank_p__Chytridiomycota	s__uncultured_soil_fungus_g__norank_p__Chytridiomycota	OTU237	21	21
d__Eukaryota	k__Fungi	p__Ascomycota	c__unclassified_p__Ascomycota	o__unclassified_p__Ascomycota	f__unclassified_p__Ascomycota	g__unclassified_p__Ascomycota	s__unclassified_p__Ascomycota	OTU220	18	18
d__Eukaryota	k__Fungi	p__Basidiomycota	c__Tremellomycetes	o__unclassified_c__Tremellomycetes	f__unclassified_c__Tremellomycetes	g__unclassified_c__Tremellomycetes	s__unclassified_c__Tremellomycetes	OTU92	25	25
d__Eukaryota	k__Fungi	p__Ascomycota	c__Dothideomycetes	o__Pleosporales	f__unclassified_o__Pleosporales	g__unclassified_o__Pleosporales	s__unclassified_o__Pleosporales	OTU94	539	539
d__Eukaryota	k__norank	p__Choanoflagellida	c__Craspedida	o__unclassified_c__Craspedida	f__unclassified_c__Craspedida	g__unclassified_c__Craspedida	s__unclassified_c__Craspedida	OTU49	1	1
d__Eukaryota	k__Alveolata	p__Ciliophora	c__Intramacronucleata	o__Conthreep	f__Colpodea	g__Platyophrya	s__unclassified_g__Platyophrya	OTU98	2	2
d__Eukaryota	k__Fungi	p__norank_k__Fungi	c__norank_k__Fungi	o__norank_k__Fungi	f__norank_k__Fungi	g__norank_k__Fungi	s__uncultured_Eimeriidae_g__norank_k__Fungi	OTU163	87	87
d__Eukaryota	k__unclassified_d__Eukaryota	p__unclassified_d__Eukaryota	c__unclassified_d__Eukaryota	o__unclassified_d__Eukaryota	f__unclassified_d__Eukaryota	g__unclassified_d__Eukaryota	s__unclassified_d__Eukaryota	OTU89	189	189
d__Eukaryota	k__Fungi	p__Ascomycota	c__Leotiomycetes	o__Helotiales	f__norank_o__Helotiales	g__norank_o__Helotiales	s__Tetracladium_marchalianum	OTU80	996	996
d__Eukaryota	k__Fungi	p__Ascomycota	c__Eurotiomycetes	o__Onygenales	f__unclassified_o__Onygenales	g__unclassified_o__Onygenales	s__unclassified_o__Onygenales	OTU184	6	6
d__Eukaryota	k__unclassified_d__Eukaryota	p__unclassified_d__Eukaryota	c__unclassified_d__Eukaryota	o__unclassified_d__Eukaryota	f__unclassified_d__Eukaryota	g__unclassified_d__Eukaryota	s__unclassified_d__Eukaryota	OTU114	5	5
d__Eukaryota	k__Fungi	p__Ascomycota	c__Sordariomycetes	o__Hypocreales	f__norank_o__Hypocreales	g__norank_o__Hypocreales	s__Sphaerodes_sp._SMCD2220	OTU108	3	3
d__Eukaryota	k__Fungi	p__norank_k__Fungi	c__norank_k__Fungi	o__norank_k__Fungi	f__norank_k__Fungi	g__norank_k__Fungi	s__unclassified_g__norank_k__Fungi	OTU88	1	1
d__Eukaryota	k__Fungi	p__Basidiomycota	c__Exobasidiomycetes	o__Malasseziales	f__norank_o__Malasseziales	g__norank_o__Malasseziales	s__uncultured_fungus_g__norank_o__Malasseziales	OTU61	19	19
d__Eukaryota	k__Fungi	p__Ascomycota	c__Eurotiomycetes	o__Chaetothyriales	f__norank_o__Chaetothyriales	g__norank_o__Chaetothyriales	s__Knufia_perforans	OTU3	414	414
d__Eukaryota	k__Fungi	p__unclassified_k__Fungi	c__unclassified_k__Fungi	o__unclassified_k__Fungi	f__unclassified_k__Fungi	g__unclassified_k__Fungi	s__unclassified_k__Fungi	OTU81	3	3
d__Eukaryota	k__Fungi	p__Ascomycota	c__unclassified_p__Ascomycota	o__unclassified_p__Ascomycota	f__unclassified_p__Ascomycota	g__unclassified_p__Ascomycota	s__unclassified_p__Ascomycota	OTU93	2	2
d__Eukaryota	k__Fungi	p__unclassified_k__Fungi	c__unclassified_k__Fungi	o__unclassified_k__Fungi	f__unclassified_k__Fungi	g__unclassified_k__Fungi	s__unclassified_k__Fungi	OTU243	3	3
d__Eukaryota	k__Fungi	p__Ascomycota	c__Dothideomycetes	o__Pleosporales	f__Didymellaceae	g__Boeremia	s__Boeremia_exigua_var._exigua	OTU72	8674	8674
d__Eukaryota	k__Fungi	p__Basidiomycota	c__Agaricomycetes	o__norank_c__Agaricomycetes	f__norank_c__Agaricomycetes	g__norank_c__Agaricomycetes	s__unclassified_g__norank_c__Agaricomycetes	OTU172	119	119
d__Eukaryota	k__Fungi	p__norank_k__Fungi	c__norank_k__Fungi	o__norank_k__Fungi	f__norank_k__Fungi	g__norank_k__Fungi	s__unclassified_g__norank_k__Fungi	OTU206	20	20
d__Eukaryota	k__Fungi	p__Ascomycota	c__Sordariomycetes	o__Diaporthales	f__unclassified_o__Diaporthales	g__unclassified_o__Diaporthales	s__unclassified_o__Diaporthales	OTU95	23	23
d__Eukaryota	k__Fungi	p__Basidiomycota	c__Agaricomycetes	o__Trechisporales	f__Hydnodontaceae	g__norank_f__Hydnodontaceae	s__uncultured_soil_fungus_g__norank_f__Hydnodontaceae	OTU66	2	2
d__Eukaryota	k__Alveolata	p__Ciliophora	c__Intramacronucleata	o__Conthreep	f__Colpodea	g__Pseudoplatyophyra	s__Pseudoplatyophrya_nana	OTU77	406	406
d__Eukaryota	k__norank	p__Choanoflagellida	c__Craspedida	o__Codonosigidae	f__norank_o__Codonosigidae	g__Monosiga	s__unclassified_g__Monosiga	OTU78	5	5
d__Eukaryota	k__Fungi	p__Basidiomycota	c__Tremellomycetes	o__Tremellales	f__unclassified_o__Tremellales	g__unclassified_o__Tremellales	s__unclassified_o__Tremellales	OTU103	373	373
d__Eukaryota	k__unclassified_d__Eukaryota	p__unclassified_d__Eukaryota	c__unclassified_d__Eukaryota	o__unclassified_d__Eukaryota	f__unclassified_d__Eukaryota	g__unclassified_d__Eukaryota	s__unclassified_d__Eukaryota	OTU122	2	2
d__Eukaryota	k__unclassified_d__Eukaryota	p__unclassified_d__Eukaryota	c__unclassified_d__Eukaryota	o__unclassified_d__Eukaryota	f__unclassified_d__Eukaryota	g__unclassified_d__Eukaryota	s__unclassified_d__Eukaryota	OTU56	3	3
d__Eukaryota	k__Fungi	p__Ascomycota	c__Pezizomycetes	o__Pezizales	f__norank_o__Pezizales	g__norank_o__Pezizales	s__uncultured_Pezizaceae	OTU33	14	14
d__Eukaryota	k__Fungi	p__Ascomycota	c__norank_p__Ascomycota	o__norank_p__Ascomycota	f__norank_p__Ascomycota	g__norank_p__Ascomycota	s__Pseudogymnoascus_destructans_g__norank_p__Ascomycota	OTU105	163	163
d__Eukaryota	k__Amoebozoa	p__norank_k__Amoebozoa	c__norank_k__Amoebozoa	o__norank_k__Amoebozoa	f__norank_k__Amoebozoa	g__norank_k__Amoebozoa	s__Dictyamoeba_vorax	OTU22	6	6
d__Eukaryota	k__Fungi	p__Basidiomycota	c__Tremellomycetes	o__unclassified_c__Tremellomycetes	f__unclassified_c__Tremellomycetes	g__unclassified_c__Tremellomycetes	s__unclassified_c__Tremellomycetes	OTU138	1	1
d__Eukaryota	k__Fungi	p__Basidiomycota	c__Tremellomycetes	o__Tremellales	f__Tremellaceae	g__unclassified_f__Tremellaceae	s__unclassified_f__Tremellaceae	OTU101	8	8
d__Eukaryota	k__Cryptophyceae	p__norank_k__Cryptophyceae	c__norank_k__Cryptophyceae	o__norank_k__Cryptophyceae	f__norank_k__Cryptophyceae	g__Goniomonas	s__unclassified_g__Goniomonas	OTU57	5	5
d__Eukaryota	k__Fungi	p__Ascomycota	c__Leotiomycetes	o__Helotiales	f__unclassified_o__Helotiales	g__unclassified_o__Helotiales	s__unclassified_o__Helotiales	OTU130	4	4
d__Eukaryota	k__Alveolata	p__Ciliophora	c__Intramacronucleata	o__Conthreep	f__Colpodea	g__unclassified_f__Colpodea	s__unclassified_f__Colpodea	OTU111	3	3
d__Eukaryota	k__Fungi	p__Ascomycota	c__Dothideomycetes	o__Jahnulales	f__Aliquandostipitaceae	g__norank_f__Aliquandostipitaceae	s__unclassified_g__norank_f__Aliquandostipitaceae	OTU12	97	97
d__Eukaryota	k__Fungi	p__Ascomycota	c__Dothideomycetes	o__Pleosporales	f__Pleosporaceae	g__Cochliobolus	s__Bipolaris_sorokiniana	OTU171	748	748
d__Eukaryota	k__Alveolata	p__Ciliophora	c__Intramacronucleata	o__Conthreep	f__Nassophorea	g__Obertrumia	s__Obertrumia_georgiana	OTU74	73	73
d__Eukaryota	k__Alveolata	p__Ciliophora	c__Intramacronucleata	o__Conthreep	f__Colpodea	g__Bryometopus	s__unclassified_g__Bryometopus	OTU45	5	5
d__Eukaryota	k__Fungi	p__Ascomycota	c__Sordariomycetes	o__Sordariales	f__norank_o__Sordariales	g__norank_o__Sordariales	s__uncultured_fungus_g__norank_o__Sordariales	OTU200	472	472
d__Eukaryota	k__Fungi	p__Ascomycota	c__Eurotiomycetes	o__Eurotiales	f__Trichocomaceae	g__unclassified_f__Trichocomaceae	s__unclassified_f__Trichocomaceae	OTU147	1089	1089
d__Eukaryota	k__Fungi	p__Ascomycota	c__Dothideomycetes	o__Capnodiales	f__Davidiellaceae	g__Cladosporium	s__Cladosporium_herbarum	OTU64	80	80
d__Eukaryota	k__Fungi	p__Basidiomycota	c__Agaricomycetes	o__Cantharellales	f__unclassified_o__Cantharellales	g__unclassified_o__Cantharellales	s__unclassified_o__Cantharellales	OTU28	2	2
d__Eukaryota	k__unclassified_d__Eukaryota	p__unclassified_d__Eukaryota	c__unclassified_d__Eukaryota	o__unclassified_d__Eukaryota	f__unclassified_d__Eukaryota	g__unclassified_d__Eukaryota	s__unclassified_d__Eukaryota	OTU223	102	102
d__Eukaryota	k__Fungi	p__Basidiomycota	c__Microbotryomycetes	o__Sporidiobolales	f__norank_o__Sporidiobolales	g__norank_o__Sporidiobolales	s__Rhodotorula_glutinis_g__norank_o__Sporidiobolales	OTU143	6	6
d__Eukaryota	k__Fungi	p__Ascomycota	c__Dothideomycetes	o__Pleosporales	f__unclassified_o__Pleosporales	g__unclassified_o__Pleosporales	s__unclassified_o__Pleosporales	OTU41	38	38
d__Eukaryota	k__Fungi	p__Blastocladiomycota	c__norank_p__Blastocladiomycota	o__norank_p__Blastocladiomycota	f__norank_p__Blastocladiomycota	g__norank_p__Blastocladiomycota	s__unclassified_g__norank_p__Blastocladiomycota	OTU110	3	3
d__Eukaryota	k__Fungi	p__norank_k__Fungi	c__norank_k__Fungi	o__norank_k__Fungi	f__norank_k__Fungi	g__norank_k__Fungi	s__Rhizopus_oryzae	OTU65	4	4
d__Eukaryota	k__Alveolata	p__Ciliophora	c__Intramacronucleata	o__Conthreep	f__Colpodea	g__unclassified_f__Colpodea	s__unclassified_f__Colpodea	OTU186	28	28
d__Eukaryota	k__Fungi	p__Basidiomycota	c__Agaricomycetes	o__norank_c__Agaricomycetes	f__norank_c__Agaricomycetes	g__norank_c__Agaricomycetes	s__Rhizoctonia_solani_g__norank	OTU229	27	27
d__Eukaryota	k__Alveolata	p__Ciliophora	c__Intramacronucleata	o__Conthreep	f__Colpodea	g__unclassified_f__Colpodea	s__unclassified_f__Colpodea	OTU11	2	2
d__Eukaryota	k__Amoebozoa	p__unclassified_k__Amoebozoa	c__unclassified_k__Amoebozoa	o__unclassified_k__Amoebozoa	f__unclassified_k__Amoebozoa	g__unclassified_k__Amoebozoa	s__unclassified_k__Amoebozoa	OTU18	3	3
d__Eukaryota	k__Cryptophyceae	p__norank_k__Cryptophyceae	c__norank_k__Cryptophyceae	o__norank_k__Cryptophyceae	f__norank_k__Cryptophyceae	g__Goniomonas	s__Goniomonas_sp._SH-3	OTU73	3	3
d__Eukaryota	k__Fungi	p__Basidiomycota	c__Agaricomycetes	o__norank_c__Agaricomycetes	f__norank_c__Agaricomycetes	g__norank_c__Agaricomycetes	s__unclassified_g__norank_c__Agaricomycetes	OTU71	9	9
d__Eukaryota	k__Amoebozoa	p__Schizoplasmodiida	c__norank_p__Schizoplasmodiida	o__norank_p__Schizoplasmodiida	f__norank_p__Schizoplasmodiida	g__unclassified_f__norank_p__Schizoplasmodiida	s__unclassified_f__norank_p__Schizoplasmodiida	OTU232	11	11
d__Eukaryota	k__Alveolata	p__Ciliophora	c__Intramacronucleata	o__Spirotrichea	f__Hypotrichia	g__unclassified_f__Hypotrichia	s__unclassified_f__Hypotrichia	OTU84	16	16
d__Eukaryota	k__Amoebozoa	p__unclassified_k__Amoebozoa	c__unclassified_k__Amoebozoa	o__unclassified_k__Amoebozoa	f__unclassified_k__Amoebozoa	g__unclassified_k__Amoebozoa	s__unclassified_k__Amoebozoa	OTU125	4	4
d__Eukaryota	k__Fungi	p__Ascomycota	c__Sordariomycetes	o__Hypocreales	f__unclassified_o__Hypocreales	g__unclassified_o__Hypocreales	s__unclassified_o__Hypocreales	OTU155	697	697
d__Eukaryota	k__Fungi	p__Ascomycota	c__Eurotiomycetes	o__Onygenales	f__Onygenaceae	g__unclassified_f__Onygenaceae	s__unclassified_f__Onygenaceae	OTU7	15	15
d__Eukaryota	k__Fungi	p__Ascomycota	c__Pezizomycetes	o__Pezizales	f__norank_o__Pezizales	g__norank_o__Pezizales	s__unclassified_g__norank_o__Pezizales	OTU225	226	226
d__Eukaryota	k__Fungi	p__Basidiomycota	c__Tremellomycetes	o__Tremellales	f__unclassified_o__Tremellales	g__unclassified_o__Tremellales	s__unclassified_o__Tremellales	OTU86	33	33
d__Eukaryota	k__Alveolata	p__Ciliophora	c__Intramacronucleata	o__Conthreep	f__Colpodea	g__Bryometopus	s__Bryometopus_pseudochilodon	OTU69	8	8
d__Eukaryota	k__Fungi	p__Ascomycota	c__Dothideomycetes	o__Pleosporales	f__unclassified_o__Pleosporales	g__unclassified_o__Pleosporales	s__unclassified_o__Pleosporales	OTU198	108	108
d__Eukaryota	k__Fungi	p__Ascomycota	c__Sordariomycetes	o__Hypocreales	f__unclassified_o__Hypocreales	g__unclassified_o__Hypocreales	s__unclassified_o__Hypocreales	OTU31	27	27
d__Eukaryota	k__norank	p__norank_d__Eukaryota	c__norank_d__Eukaryota	o__norank_d__Eukaryota	f__norank_d__Eukaryota	g__norank_d__Eukaryota	s__Nutomonas_longa	OTU141	1	1
d__Eukaryota	k__norank	p__Choanoflagellida	c__Craspedida	o__Salpingoecidae	f__norank_o__Salpingoecidae	g__Salpingoeca	s__uncultured_eukaryote_g__Salpingoeca	OTU157	1	1
d__Eukaryota	k__unclassified_d__Eukaryota	p__unclassified_d__Eukaryota	c__unclassified_d__Eukaryota	o__unclassified_d__Eukaryota	f__unclassified_d__Eukaryota	g__unclassified_d__Eukaryota	s__unclassified_d__Eukaryota	OTU150	2	2
d__Eukaryota	k__Alveolata	p__Ciliophora	c__Intramacronucleata	o__Conthreep	f__Oligohymenophorea	g__Homalogastra	s__unclassified_g__Homalogastra	OTU26	3	3
d__Eukaryota	k__Discicristoidea	p__norank_k__Discicristoidea	c__norank_k__Discicristoidea	o__norank_k__Discicristoidea	f__norank_k__Discicristoidea	g__norank_k__Discicristoidea	s__uncultured_fungus_g__norank_k__Discicristoidea	OTU1	2	2
d__Eukaryota	k__Fungi	p__Ascomycota	c__Eurotiomycetes	o__Eurotiales	f__unclassified_o__Eurotiales	g__unclassified_o__Eurotiales	s__unclassified_o__Eurotiales	OTU70	32	32
d__Eukaryota	k__Fungi	p__unclassified_k__Fungi	c__unclassified_k__Fungi	o__unclassified_k__Fungi	f__unclassified_k__Fungi	g__unclassified_k__Fungi	s__unclassified_k__Fungi	OTU162	8	8
d__Eukaryota	k__Fungi	p__Blastocladiomycota	c__norank_p__Blastocladiomycota	o__norank_p__Blastocladiomycota	f__norank_p__Blastocladiomycota	g__norank_p__Blastocladiomycota	s__Catenaria_anguillulae	OTU76	49	49
d__Eukaryota	k__Fungi	p__Ascomycota	c__Sordariomycetes	o__Hypocreales	f__norank_o__Hypocreales	g__norank_o__Hypocreales	s__Geosmithia_putterillii	OTU55	100	100
d__Eukaryota	k__Fungi	p__Basidiomycota	c__Agaricostilbomycetes	o__Agaricostilbales	f__norank_o__Agaricostilbales	g__norank_o__Agaricostilbales	s__Kurtzmanomyces_insolitus	OTU82	1	1
d__Eukaryota	k__norank	p__Choanoflagellida	c__Craspedida	o__Salpingoecidae	f__norank_o__Salpingoecidae	g__Freshwater_Choanoflagellates_2	s__uncultured_freshwater_eukaryote_g__Freshwater_Choanoflagellates_2	OTU222	2	2
d__Eukaryota	k__Amoebozoa	p__unclassified_k__Amoebozoa	c__unclassified_k__Amoebozoa	o__unclassified_k__Amoebozoa	f__unclassified_k__Amoebozoa	g__unclassified_k__Amoebozoa	s__unclassified_k__Amoebozoa	OTU158	1	1
d__Eukaryota	k__norank	p__Choanoflagellida	c__Craspedida	o__Codosigidae	f__norank_o__Codosigidae	g__Freshwater_Choanoflagellates_1	s__uncultured_eukaryote_g__Freshwater_Choanoflagellates_1	OTU240	22	22
d__Eukaryota	k__unclassified_d__Eukaryota	p__unclassified_d__Eukaryota	c__unclassified_d__Eukaryota	o__unclassified_d__Eukaryota	f__unclassified_d__Eukaryota	g__unclassified_d__Eukaryota	s__unclassified_d__Eukaryota	OTU165	8	8
d__Eukaryota	k__Alveolata	p__Ciliophora	c__Intramacronucleata	o__Conthreep	f__Colpodea	g__Pseudoplatyophyra	s__uncultured_eukaryote_g__Pseudoplatyophyra	OTU129	46	46
d__Eukaryota	k__Fungi	p__Ascomycota	c__Sordariomycetes	o__unclassified_c__Sordariomycetes	f__unclassified_c__Sordariomycetes	g__unclassified_c__Sordariomycetes	s__unclassified_c__Sordariomycetes	OTU153	1	1
d__Eukaryota	k__Fungi	p__Chytridiomycota	c__norank_p__Chytridiomycota	o__norank_p__Chytridiomycota	f__norank_p__Chytridiomycota	g__norank_p__Chytridiomycota	s__unclassified_g__norank_p__Chytridiomycota	OTU189	22	22
d__Eukaryota	k__Fungi	p__Ascomycota	c__Sordariomycetes	o__Hypocreales	f__unclassified_o__Hypocreales	g__unclassified_o__Hypocreales	s__unclassified_o__Hypocreales	OTU233	21	21
d__Eukaryota	k__Fungi	p__Chytridiomycota	c__norank_p__Chytridiomycota	o__norank_p__Chytridiomycota	f__norank_p__Chytridiomycota	g__norank_p__Chytridiomycota	s__unclassified_g__norank_p__Chytridiomycota	OTU228	1	1
d__Eukaryota	k__Fungi	p__Ascomycota	c__unclassified_p__Ascomycota	o__unclassified_p__Ascomycota	f__unclassified_p__Ascomycota	g__unclassified_p__Ascomycota	s__unclassified_p__Ascomycota	OTU58	8	8
d__Eukaryota	k__norank	p__unclassified_k__norank	c__unclassified_k__norank	o__unclassified_k__norank	f__unclassified_k__norank	g__unclassified_k__norank	s__unclassified_k__norank	OTU67	3	3
d__Eukaryota	k__Alveolata	p__Ciliophora	c__Intramacronucleata	o__Conthreep	f__Colpodea	g__norank_f__Colpodea	s__uncultured_Eimeriidae_g__norank_f__Colpodea	OTU128	50	50
d__Eukaryota	k__Fungi	p__Chytridiomycota	c__norank_p__Chytridiomycota	o__norank_p__Chytridiomycota	f__norank_p__Chytridiomycota	g__norank_p__Chytridiomycota	s__unclassified_g__norank_p__Chytridiomycota	OTU135	117	117
d__Eukaryota	k__Fungi	p__Ascomycota	c__unclassified_p__Ascomycota	o__unclassified_p__Ascomycota	f__unclassified_p__Ascomycota	g__unclassified_p__Ascomycota	s__unclassified_p__Ascomycota	OTU211	1	1
d__Eukaryota	k__Fungi	p__Ascomycota	c__unclassified_p__Ascomycota	o__unclassified_p__Ascomycota	f__unclassified_p__Ascomycota	g__unclassified_p__Ascomycota	s__unclassified_p__Ascomycota	OTU217	19	19
d__Eukaryota	k__Fungi	p__Basidiomycota	c__Agaricomycetes	o__norank_c__Agaricomycetes	f__norank_c__Agaricomycetes	g__norank_c__Agaricomycetes	s__Rhizoctonia_solani_g__norank	OTU4	24	24
d__Eukaryota	k__Alveolata	p__Ciliophora	c__Intramacronucleata	o__Conthreep	f__Phyllopharyngea	g__unclassified_f__Phyllopharyngea	s__unclassified_f__Phyllopharyngea	OTU221	1	1
d__Eukaryota	k__Rhizaria	p__Cercozoa	c__Phytomyxea	o__norank_c__Phytomyxea	f__norank_c__Phytomyxea	g__Polymyxa	s__uncultured_plasmodiophorid_g__Polymyxa	OTU75	2	2
d__Eukaryota	k__norank	p__norank_d__Eukaryota	c__norank_d__Eukaryota	o__norank_d__Eukaryota	f__norank_d__Eukaryota	g__norank_d__Eukaryota	s__uncultured_Boletaceae_g__norank_d__Eukaryota	OTU152	1	1
d__Eukaryota	k__Rhizaria	p__Cercozoa	c__RM2-SGM58	o__norank_c__RM2-SGM58	f__norank_c__RM2-SGM58	g__norank_c__RM2-SGM58	s__Dimorpha-like_sp._ATCC_50522	OTU182	2	2
d__Eukaryota	k__Fungi	p__Basidiomycota	c__Pucciniomycetes	o__Pucciniales	f__norank_o__Pucciniales	g__norank_o__Pucciniales	s__unclassified_g__norank_o__Pucciniales	OTU90	10	10
d__Eukaryota	k__Fungi	p__Ascomycota	c__norank_p__Ascomycota	o__norank_p__Ascomycota	f__norank_p__Ascomycota	g__norank_p__Ascomycota	s__Ochroconis_tshawytschae	OTU201	76	76
d__Eukaryota	k__Fungi	p__Ascomycota	c__Dothideomycetes	o__Capnodiales	f__Davidiellaceae	g__Cladosporium	s__Cladosporium_herbarum	OTU106	10591	10591
d__Eukaryota	k__Fungi	p__Chytridiomycota	c__norank_p__Chytridiomycota	o__norank_p__Chytridiomycota	f__norank_p__Chytridiomycota	g__norank_p__Chytridiomycota	s__uncultured_Rhizophlyctis	OTU47	3	3
d__Eukaryota	k__Fungi	p__Ascomycota	c__Eurotiomycetes	o__Chaetothyriales	f__Herpotrichiellaceae	g__unclassified_f__Herpotrichiellaceae	s__unclassified_f__Herpotrichiellaceae	OTU118	222	222
d__Eukaryota	k__Fungi	p__unclassified_k__Fungi	c__unclassified_k__Fungi	o__unclassified_k__Fungi	f__unclassified_k__Fungi	g__unclassified_k__Fungi	s__unclassified_k__Fungi	OTU183	28	28
d__Eukaryota	k__Fungi	p__Ascomycota	c__Sordariomycetes	o__Ophiostomatales	f__unclassified_o__Ophiostomatales	g__unclassified_o__Ophiostomatales	s__unclassified_o__Ophiostomatales	OTU190	15	15
d__Eukaryota	k__Fungi	p__Ascomycota	c__Sordariomycetes	o__Microascales	f__Microascaceae	g__Pseudallescheria	s__Scedosporium_boydii	OTU59	1541	1541
d__Eukaryota	k__Fungi	p__Ascomycota	c__Dothideomycetes	o__Capnodiales	f__Davidiellaceae	g__Cladosporium	s__Cladosporium_herbarum	OTU25	84	84
d__Eukaryota	k__Fungi	p__Ascomycota	c__Sordariomycetes	o__unclassified_c__Sordariomycetes	f__unclassified_c__Sordariomycetes	g__unclassified_c__Sordariomycetes	s__unclassified_c__Sordariomycetes	OTU68	2	2
d__Eukaryota	k__Fungi	p__Ascomycota	c__Sordariomycetes	o__unclassified_c__Sordariomycetes	f__unclassified_c__Sordariomycetes	g__unclassified_c__Sordariomycetes	s__unclassified_c__Sordariomycetes	OTU63	56	56
d__Eukaryota	k__Fungi	p__Chytridiomycota	c__norank_p__Chytridiomycota	o__norank_p__Chytridiomycota	f__norank_p__Chytridiomycota	g__norank_p__Chytridiomycota	s__unclassified_g__norank_p__Chytridiomycota	OTU60	24	24
d__Eukaryota	k__Fungi	p__Basidiomycota	c__Tremellomycetes	o__Tremellales	f__norank_o__Tremellales	g__norank_o__Tremellales	s__unclassified_g__norank_o__Tremellales	OTU127	709	709
d__Eukaryota	k__Fungi	p__Ascomycota	c__norank_p__Ascomycota	o__norank_p__Ascomycota	f__norank_p__Ascomycota	g__norank_p__Ascomycota	s__ascomycete_sp._He1C	OTU62	30	30
d__Eukaryota	k__Alveolata	p__norank_k__Alveolata	c__norank_k__Alveolata	o__norank_k__Alveolata	f__norank_k__Alveolata	g__norank_k__Alveolata	s__unclassified_g__norank_k__Alveolata	OTU40	3	3
d__Eukaryota	k__Fungi	p__Basidiomycota	c__Cystobasidiomycetes	o__Cystobasidiales	f__Cystobasidiaceae	g__Occultifur	s__Occultifur_externus	OTU79	8	8
d__Eukaryota	k__Fungi	p__Ascomycota	c__unclassified_p__Ascomycota	o__unclassified_p__Ascomycota	f__unclassified_p__Ascomycota	g__unclassified_p__Ascomycota	s__unclassified_p__Ascomycota	OTU38	81	81
d__Eukaryota	k__Fungi	p__Chytridiomycota	c__norank_p__Chytridiomycota	o__norank_p__Chytridiomycota	f__norank_p__Chytridiomycota	g__norank_p__Chytridiomycota	s__uncultured_soil_fungus_g__norank_p__Chytridiomycota	OTU191	5	5
d__Eukaryota	k__Fungi	p__Ascomycota	c__Eurotiomycetes	o__Arachnomycetales	f__Arachnomycetaceae	g__Arachnomyces	s__unclassified_g__Arachnomyces	OTU236	42	42
d__Eukaryota	k__Fungi	p__Glomeromycota	c__norank_p__Glomeromycota	o__norank_p__Glomeromycota	f__norank_p__Glomeromycota	g__norank_p__Glomeromycota	s__uncultured_mycorrhizal_fungus	OTU169	1	1
d__Eukaryota	k__Fungi	p__unclassified_k__Fungi	c__unclassified_k__Fungi	o__unclassified_k__Fungi	f__unclassified_k__Fungi	g__unclassified_k__Fungi	s__unclassified_k__Fungi	OTU85	41	41
